# Supplementary material for: Changes in health in England, with analysis by English regions and areas of deprivation, 1990–2013: a systematic analysis for the Global Burden of Disease Study 2013
Source: PubMed Central journal article supplement (PMC4672153; doi:10.1016/s0140-6736(15)00195-6), 2015-12-05
Supplement: mmc1.pdf [file mmc1.pdf]

# THE LANCET

## **Supplementary appendix**

This appendix formed part of the original submission and has been peer reviewed. We post it as supplied by the authors.

Supplement to: Newton JN, Briggs ADM, Murray CJL, et al. Changes in health in England, with analysis by English regions and areas of deprivation, 1990–2013: a systematic analysis for the Global Burden of Disease Study 2013. *Lancet* 2015; published online September 15. [http://dx.doi.org/10.1016/S0140-6736\(15\)00195-6](http://dx.doi.org/10.1016/S0140-6736(15)00195-6).

# Appendix to Changes in health in England, with analysis by English regions, and areas of deprivation, 1990–2013: a systematic analysis for the Global Burden of Disease Study 2013

---

This appendix provides three supplementary figures and nine supplementary tables.

## Table of Contents

|                                       |   |
|---------------------------------------|---|
| Section 1. Supplementary figures..... | 1 |
| Section 2. Supplementary tables.....  | 4 |

**Web Figure 1: The 25 leading GBD level 3 causes of deaths in England, both sexes combined, 1990, 2005, and 2013, with age-standardized median percent change.** Ranks are based on the number of deaths. Mean rank across the 1000 draws of deaths are shown with 95% uncertainty intervals in ranks in parentheses. Changes in all age and in age-standardised deaths are also shown with 95% uncertainty intervals in parentheses. Communicable, maternal, neonatal, and nutritional disorders causes are shown in red, non-communicable causes in blue, and injuries in green.

| Rank 1990    | Leading causes 1990            | Leading causes 2005            | Rank 2005    | Age-standardized % change 1990-2005 | Leading causes 2013            | Rank 2013    | Age-standardized % change 2005-2013 |
|--------------|--------------------------------|--------------------------------|--------------|-------------------------------------|--------------------------------|--------------|-------------------------------------|
| 1.0 (1-1)    | 1 Ischemic heart disease       | 1 Ischemic heart disease       | 1.0 (1-1)    | -38% (-39 to -29%)                  | 1 Ischemic heart disease       | 1.0 (1-1)    | -14% (-18 to -8%)                   |
| 2.0 (2-2)    | 2 Cerebrovascular disease      | 2 Cerebrovascular disease      | 2.0 (2-2)    | -23% (-26 to -12%)                  | 2 Cerebrovascular disease      | 2.1 (2-3)    | -4% (-10 to 2%)                     |
| 3.1 (3-4)    | 3 Lung cancer                  | 3 Lower respiratory infections | 3.4 (3-4)    | 10% (-5 to 17%)                     | 3 Alzheimer disease            | 3.0 (2-4)    | 18% (5 to 32%)                      |
| 3.9 (3-4)    | 4 Lower respiratory infections | 4 Alzheimer disease            | 3.6 (3-4)    | 28% (13 to 47%)                     | 4 Lower respiratory infections | 4.0 (3-5)    | -5% (-12 to 7%)                     |
| 5.3 (5-6)    | 5 Alzheimer disease            | 5 Lung cancer                  | 5.1 (5-6)    | -14% (-21 to -11%)                  | 5 Lung cancer                  | 5.1 (4-6)    | 5% (-2 to 12%)                      |
| 5.7 (5-6)    | 6 COPD                         | 6 COPD                         | 5.9 (5-6)    | 2% (-3 to 19%)                      | 6 COPD                         | 5.8 (4-6)    | 5% (-2 to 13%)                      |
| 7.0 (7-7)    | 7 Colorectal cancer            | 7 Colorectal cancer            | 7.0 (7-7)    | -13% (-16 to -10%)                  | 7 Colorectal cancer            | 7.0 (7-7)    | 7% (0 to 13%)                       |
| 8.0 (8-8)    | 8 Breast cancer                | 8 Breast cancer                | 8.1 (8-9)    | -15% (-20 to -12%)                  | 8 Breast cancer                | 8.2 (8-10)   | -5% (-13 to 5%)                     |
| 9.2 (9-11)   | 9 Stomach cancer               | 9 Other cardiovascular         | 9.2 (8-11)   | 37% (-24 to 46%)                    | 9 Other cardiovascular         | 9.4 (8-13)   | -4% (-16 to 5%)                     |
| 10.4 (9-13)  | 10 Aortic aneurysm             | 10 Prostate cancer             | 10.1 (8-12)  | 16% (-10 to 32%)                    | 10 Prostate cancer             | 9.8 (8-14)   | 13% (-8 to 24%)                     |
| 11.0 (9-13)  | 11 Other cardiovascular        | 11 Aortic aneurysm             | 11.0 (10-14) | -4% (-17 to 1%)                     | 11 Pancreatic cancer           | 11.1 (10-12) | 13% (6 to 19%)                      |
| 11.8 (9-15)  | 12 Prostate cancer             | 12 Pancreatic cancer           | 12.0 (11-13) | 7% (2 to 10%)                       | 12 Aortic aneurysm             | 12.8 (10-16) | -10% (-17 to -1%)                   |
| 12.7 (11-13) | 13 Diabetes                    | 13 Stomach cancer              | 13.7 (11-16) | -31% (-37 to -27%)                  | 13 Esophageal cancer           | 13.8 (10-16) | 6% (-5 to 23%)                      |
| 13.9 (13-14) | 14 Pancreatic cancer           | 14 Esophageal cancer           | 14.0 (12-15) | 25% (20 to 30%)                     | 14 Urinary diseases            | 14.5 (11-27) | 14% (-4 to 25%)                     |
| 15.3 (15-18) | 15 Self-harm                   | 15 Urinary diseases            | 15.8 (13-27) | 150% (1 to 167%)                    | 15 Falls                       | 15.0 (13-21) | 10% (-1 to 21%)                     |
| 16.4 (15-21) | 16 Cardiomyopathy              | 16 Falls                       | 16.3 (15-20) | 72% (4 to 85%)                      | 16 Stomach cancer              | 15.3 (13-17) | -6% (-12 to 3%)                     |
| 17.0 (15-19) | 17 Esophageal cancer           | 17 Diabetes                    | 17.0 (15-18) | -29% (-33 to -23%)                  | 17 Other neoplasms             | 17.1 (15-21) | 9% (0 to 18%)                       |
| 18.5 (16-23) | 18 Bladder cancer              | 18 Other neoplasms             | 17.8 (16-21) | 33% (-1 to 39%)                     | 18 Diabetes                    | 18.4 (16-20) | -6% (-12 to 0%)                     |
| 19.3 (17-21) | 19 Road injuries               | 19 Lymphoma                    | 19.6 (16-27) | 37% (-11 to 42%)                    | 19 Lymphoma                    | 19.5 (15-29) | 7% (-14 to 17%)                     |
| 19.7 (17-24) | 20 Chronic kidney disease      | 20 Ovarian cancer              | 20.3 (18-23) | 5% (-5 to 9%)                       | 20 Chronic kidney disease      | 20.1 (16-23) | 19% (6 to 28%)                      |
| 21.4 (18-26) | 21 Peptic ulcer disease        | 21 Self-harm                   | 20.9 (17-23) | -27% (-29 to -12%)                  | 21 Parkinson disease           | 21.5 (18-27) | 12% (0 to 22%)                      |
| 22.3 (18-25) | 22 Other neoplasms             | 22 Parkinson disease           | 22.2 (19-29) | 14% (5 to 22%)                      | 22 Atrial fibrillation         | 22.5 (18-28) | 43% (25 to 63%)                     |
| 22.6 (20-25) | 23 Ovarian cancer              | 23 Chronic kidney disease      | 23.1 (17-26) | -17% (-21 to 9%)                    | 23 Ovarian cancer              | 23.7 (21-27) | 0% (-8 to 10%)                      |
| 24.8 (24-27) | 24 Leukemia                    | 24 Leukemia                    | 24.0 (22-26) | 7% (0 to 10%)                       | 24 Leukemia                    | 23.7 (21-26) | 9% (-2 to 16%)                      |
| 25.3 (17-27) | 25 Falls                       | 25 Bladder cancer              | 24.3 (19-27) | -22% (-25 to -11%)                  | 25 Bladder cancer              | 25.0 (20-29) | 5% (-6 to 14%)                      |
|              | 26 Parkinson disease           | 26 Peptic ulcer disease        |              |                                     | 26 Self-harm                   |              |                                     |
|              | 27 Lymphoma                    | 27 Road injuries               |              |                                     |                                |              |                                     |
|              | 29 Urinary diseases            | 30 Atrial fibrillation         |              |                                     |                                |              |                                     |
|              |                                | 32 Cardiomyopathy              |              |                                     |                                |              |                                     |

**Legend:**  
 Communicable, maternal, neonatal and nutritional  
 Non-communicable  
 Injuries

Web Figure 2 : Age-standardized rates of disability-adjusted life years (DALYs) for England relative to the deprivations in the nine regions for both sexes combined in 2013

|                                           | Low back & neck pain | ischemic heart disease | Cerebrovascular disease | COPD       | Lung cancer | Alzheimer disease | Sense organ diseases | Depressive disorders | Falls      | Skin diseases | Diabetes   | Lower respiratory infections | Chronic kidney disease | Colorectal cancer | Migraine   | Other musculoskeletal | Anxiety disorders | Breast cancer | Other cardiovascular | Drug use disorders | Congenital anomalies | Oral disorders | Neonatal preterm birth | Self-harm  | Iron-deficiency anemia |
|-------------------------------------------|----------------------|------------------------|-------------------------|------------|-------------|-------------------|----------------------|----------------------|------------|---------------|------------|------------------------------|------------------------|-------------------|------------|-----------------------|-------------------|---------------|----------------------|--------------------|----------------------|----------------|------------------------|------------|------------------------|
| East of England, Deprivation Level 5      | 2062                 | 843                    | 438                     | 387        | 391         | 371               | 514                  | 750                  | 463        | 730           | 430        | 248                          | 371                    | 270               | 473        | 366                   | 454               | 305           | 197                  | 238                | 334                  | 267            | 309                    | 184        | 336                    |
| South East England, Deprivation Level 5   | 2041                 | 778                    | 487                     | 401        | 382         | 421               | 509                  | 690                  | 463        | 688           | 404        | 289                          | 399                    | 282               | 495        | 366                   | 454               | 311           | 190                  | 220                | 327                  | 268            | 261                    | 196        | 339                    |
| South West England, Deprivation Level 5   | 2032                 | 857                    | 482                     | 378        | 395         | 397               | 578                  | 503                  | 406        | 713           | 433        | 258                          | 393                    | 293               | 472        | 373                   | 452               | 306           | 215                  | 237                | 333                  | 264            | 280                    | 217        | 340                    |
| East Midlands, Deprivation Level 5        | 1957                 | 911                    | 470                     | 390        | 400         | 373               | 589                  | 712                  | 436        | 742           | 413        | 273                          | 380                    | 297               | 484        | 359                   | 454               | 328           | 185                  | 221                | 372                  | 265            | 295                    | 192        | 340                    |
| North West England, Deprivation Level 5   | 1823                 | 955                    | 545                     | 374        | 442         | 334               | 582                  | 726                  | 372        | 726           | 353        | 320                          | 356                    | 295               | 466        | 370                   | 454               | 292           | 232                  | 207                | 401                  | 267            | 314                    | 206        | 338                    |
| North East England, Deprivation Level 5   | 2077                 | 956                    | 492                     | 329        | 461         | 302               | 577                  | 848                  | 401        | 689           | 289        | 279                          | 441                    | 277               | 478        | 380                   | 453               | 315           | 201                  | 204                | 460                  | 265            | 267                    | 152        | 338                    |
| Yorkshire and the Humber, Deprivation Lev | 2079                 | 999                    | 577                     | 378        | 423         | 371               | 574                  | 702                  | 435        | 746           | 448        | 290                          | 403                    | 291               | 485        | 354                   | 452               | 317           | 206                  | 169                | 392                  | 265            | 241                    | 192        | 367                    |
| West Midlands, Deprivation Level 5        | 2116                 | 861                    | 489                     | 365        | 369         | 354               | 579                  | 626                  | 435        | 852           | 414        | 248                          | 387                    | 278               | 482        | 362                   | 452               | 335           | 205                  | 277                | 437                  | 266            | 313                    | 207        | 344                    |
| South East England, Deprivation Level 4   | 2042                 | 931                    | 507                     | 496        | 467         | 414               | 508                  | 690                  | 475        | 696           | 426        | 295                          | 390                    | 302               | 495        | 374                   | 455               | 325           | 243                  | 270                | 333                  | 268            | 281                    | 228        | 340                    |
| Greater London, Deprivation Level 5       | 2103                 | 901                    | 478                     | 407        | 442         | 395               | 560                  | 691                  | 466        | 710           | 309        | 342                          | 488                    | 272               | 495        | 390                   | 454               | 304           | 212                  | 255                | 391                  | 262            | 235                    | 197        | 332                    |
| South West England, Deprivation Level 4   | 2032                 | 943                    | 558                     | 463        | 445         | 460               | 578                  | 504                  | 463        | 714           | 448        | 294                          | 405                    | 309               | 472        | 372                   | 453               | 331           | 244                  | 247                | 366                  | 264            | 339                    | 248        | 338                    |
| North West England, Deprivation Level 4   | 1824                 | 1122                   | 613                     | 478        | 523         | 362               | 581                  | 727                  | 403        | 737           | 384        | 352                          | 372                    | 297               | 466        | 364                   | 454               | 321           | 263                  | 222                | 463                  | 267            | 287                    | 235        | 342                    |
| East of England, Deprivation Level 4      | 2061                 | 1008                   | 533                     | 471        | 468         | 471               | 514                  | 750                  | 484        | 737           | 474        | 299                          | 422                    | 294               | 472        | 378                   | 453               | 330           | 226                  | 279                | 436                  | 267            | 303                    | 183        | 337                    |
| North East England, Deprivation Level 4   | 2076                 | 1040                   | 561                     | 432        | 582         | 397               | 577                  | 848                  | 449        | 688           | 372        | 307                          | 458                    | 293               | 476        | 381                   | 453               | 306           | 244                  | 275                | 385                  | 265            | 262                    | 197        | 341                    |
| Greater London, Deprivation Level 4       | 2103                 | 1004                   | 508                     | 477        | 487         | 383               | 560                  | 691                  | 502        | 715           | 388        | 353                          | 391                    | 285               | 493        | 382                   | 454               | 334           | 257                  | 240                | 385                  | 262            | 283                    | 155        | 334                    |
| East Midlands, Deprivation Level 4        | 1957                 | 1080                   | 551                     | 496        | 480         | 394               | 589                  | 711                  | 453        | 750           | 453        | 320                          | 395                    | 311               | 483        | 370                   | 453               | 333           | 243                  | 245                | 431                  | 265            | 307                    | 206        | 341                    |
| Yorkshire and the Humber, Deprivation Lev | 2079                 | 1139                   | 579                     | 496        | 549         | 397               | 574                  | 703                  | 451        | 750           | 481        | 320                          | 429                    | 311               | 486        | 356                   | 454               | 327           | 234                  | 286                | 358                  | 265            | 312                    | 219        | 365                    |
| West Midlands, Deprivation Level 4        | 2116                 | 1053                   | 644                     | 448        | 458         | 453               | 578                  | 625                  | 504        | 859           | 442        | 340                          | 402                    | 326               | 480        | 366                   | 452               | 326           | 243                  | 215                | 369                  | 266            | 381                    | 219        | 345                    |
| Greater London, Deprivation Level 3       | 2102                 | 1091                   | 544                     | 562        | 539         | 411               | 560                  | 691                  | 473        | 717           | 438        | 385                          | 409                    | 276               | 492        | 388                   | 453               | 318           | 264                  | 347                | 396                  | 262            | 333                    | 242        | 335                    |
| South West England, Deprivation Level 3   | 2032                 | 1095                   | 580                     | 568        | 511         | 427               | 578                  | 504                  | 480        | 721           | 489        | 301                          | 393                    | 319               | 472        | 373                   | 453               | 334           | 264                  | 350                | 438                  | 264            | 376                    | 306        | 339                    |
| South East England, Deprivation Level 3   | 2040                 | 1075                   | 578                     | 622        | 575         | 469               | 508                  | 690                  | 531        | 697           | 474        | 328                          | 400                    | 313               | 494        | 374                   | 454               | 346           | 268                  | 333                | 433                  | 268            | 323                    | 245        | 344                    |
| East of England, Deprivation Level 3      | 2062                 | 1165                   | 579                     | 587        | 577         | 488               | 513                  | 751                  | 510        | 745           | 519        | 328                          | 416                    | 332               | 473        | 382                   | 454               | 327           | 280                  | 367                | 445                  | 267            | 357                    | 232        | 337                    |
| North East England, Deprivation Level 3   | 2077                 | 1367                   | 569                     | 573        | 754         | 405               | 576                  | 848                  | 472        | 692           | 417        | 341                          | 402                    | 334               | 476        | 376                   | 453               | 308           | 271                  | 258                | 456                  | 265            | 206                    | 281        | 343                    |
| <b>England</b>                            | <b>2029</b>          | <b>1220</b>            | <b>598</b>              | <b>644</b> | <b>633</b>  | <b>442</b>        | <b>558</b>           | <b>688</b>           | <b>494</b> | <b>738</b>    | <b>480</b> | <b>344</b>                   | <b>411</b>             | <b>323</b>        | <b>481</b> | <b>372</b>            | <b>454</b>        | <b>323</b>    | <b>272</b>           | <b>391</b>         | <b>430</b>           | <b>266</b>     | <b>369</b>             | <b>257</b> | <b>342</b>             |
| East Midlands, Deprivation Level 3        | 1956                 | 1267                   | 659                     | 624        | 613         | 488               | 589                  | 711                  | 452        | 756           | 482        | 374                          | 425                    | 324               | 482        | 364                   | 453               | 329           | 269                  | 322                | 432                  | 265            | 401                    | 242        | 339                    |
| North West England, Deprivation Level 3   | 1824                 | 1281                   | 677                     | 578        | 653         | 440               | 581                  | 727                  | 475        | 735           | 422        | 399                          | 445                    | 354               | 465        | 370                   | 454               | 308           | 282                  | 305                | 466                  | 267            | 352                    | 269        | 340                    |
| Yorkshire and the Humber, Deprivation Lev | 2078                 | 1334                   | 662                     | 606        | 640         | 436               | 574                  | 702                  | 451        | 749           | 483        | 354                          | 399                    | 339               | 484        | 362                   | 453               | 334           | 268                  | 289                | 469                  | 265            | 376                    | 275        | 367                    |
| Greater London, Deprivation Level 2       | 2102                 | 1288                   | 570                     | 741        | 698         | 439               | 560                  | 691                  | 500        | 719           | 486        | 368                          | 402                    | 295               | 493        | 378                   | 454               | 306           | 312                  | 398                | 407                  | 262            | 364                    | 257        | 332                    |
| West Midlands, Deprivation Level 3        | 2116                 | 1225                   | 669                     | 579        | 570         | 505               | 578                  | 626                  | 524        | 858           | 521        | 370                          | 396                    | 328               | 480        | 368                   | 452               | 322           | 291                  | 380                | 517                  | 266            | 414                    | 250        | 348                    |
| South West England, Deprivation Level 2   | 2031                 | 1277                   | 621                     | 751        | 676         | 460               | 577                  | 504                  | 533        | 722           | 536        | 324                          | 436                    | 350               | 471        | 375                   | 453               | 326           | 311                  | 531                | 391                  | 264            | 376                    | 291        | 341                    |
| South East England, Deprivation Level 2   | 2040                 | 1269                   | 574                     | 831        | 736         | 468               | 508                  | 690                  | 505        | 699           | 504        | 342                          | 431                    | 347               | 493        | 375                   | 454               | 314           | 309                  | 594                | 422                  | 268            | 372                    | 259        | 340                    |
| East of England, Deprivation Level 2      | 2063                 | 1399                   | 627                     | 800        | 724         | 463               | 512                  | 751                  | 488        | 747           | 568        | 369                          | 415                    | 366               | 473        | 394                   | 454               | 361           | 296                  | 532                | 411                  | 267            | 444                    | 306        | 342                    |
| Yorkshire and the Humber, Deprivation Lev | 2078                 | 1554                   | 697                     | 840        | 888         | 471               | 574                  | 703                  | 491        | 757           | 536        | 408                          | 434                    | 321               | 484        | 354                   | 453               | 314           | 304                  | 447                | 425                  | 265            | 379                    | 293        | 364                    |
| East Midlands, Deprivation Level 2        | 1956                 | 1494                   | 673                     | 818        | 793         | 517               | 588                  | 712                  | 556        | 765           | 576        | 389                          | 423                    | 369               | 483        | 369                   | 453               | 327           | 297                  | 425                | 448                  | 265            | 471                    | 266        | 342                    |
| Greater London, Deprivation Level 1       | 2103                 | 1491                   | 642                     | 943        | 825         | 482               | 560                  | 691                  | 517        | 722           | 580        | 378                          | 421                    | 325               | 493        | 388                   | 454               | 289           | 364                  | 484                | 452                  | 262            | 403                    | 242        | 333                    |
| West Midlands, Deprivation Level 2        | 2116                 | 1450                   | 672                     | 813        | 760         | 458               | 577                  | 626                  | 543        | 858           | 592        | 408                          | 475                    | 372               | 480        | 371                   | 452               | 335           | 302                  | 400                | 523                  | 266            | 506                    | 278        | 350                    |
| North East England, Deprivation Level 2   | 2078                 | 1601                   | 794                     | 880        | 998         | 481               | 576                  | 849                  | 500        | 694           | 448        | 394                          | 415                    | 418               | 478        | 376                   | 454               | 345           | 303                  | 428                | 357                  | 265            | 304                    | 332        | 343                    |
| North West England, Deprivation Level 2   | 1823                 | 1636                   | 760                     | 892        | 864         | 562               | 581                  | 727                  | 549        | 740           | 491        | 441                          | 419                    | 353               | 464        | 372                   | 454               | 344           | 327                  | 451                | 448                  | 267            | 448                    | 334        | 341                    |
| South East England, Deprivation Level 1   | 2038                 | 1584                   | 643                     | 1136       | 976         | 448               | 508                  | 689                  | 611        | 713           | 576        | 364                          | 449                    | 357               | 492        | 380                   | 453               | 319           | 348                  | 867                | 435                  | 268            | 358                    | 365        | 340                    |
| West Midlands, Deprivation Level 1        | 2116                 | 1772                   | 724                     | 1087       | 931         | 475               | 578                  | 627                  | 583        | 863           | 750        | 416                          | 459                    | 375               | 481        | 373                   | 453               | 337           | 338                  | 491                | 594                  | 266            | 557                    | 278        | 348                    |
| East of England, Deprivation Level 1      | 2062                 | 1809                   | 658                     | 992        | 930         | 464               | 512                  | 751                  | 493        | 746           | 662        | 386                          | 498                    | 340               | 472        | 381                   | 453               | 336           | 356                  | 879                | 560                  | 267            | 403                    | 406        | 337                    |
| East Midlands, Deprivation Level 1        | 1956                 | 1803                   | 726                     | 1114       | 976         | 537               | 588                  | 712                  | 586        | 760           | 668        | 431                          | 503                    | 389               | 483        | 370                   | 454               | 337           | 394                  | 637                | 502                  | 265            | 476                    | 308        | 344                    |
| South West England, Deprivation Level 1   | 2030                 | 1623                   | 710                     | 1162       | 976         | 484               | 578                  | 504                  | 512        | 727           | 584        | 394                          | 487                    | 407               | 471        | 380                   | 453               | 333           | 384                  | 957                | 460                  | 264            | 421                    | 443        | 343                    |
| North East England, Deprivation Level 1   | 2077                 | 1967                   | 858                     | 1179       | 1339        | 575               | 576                  | 849                  | 584        | 687           | 509        | 445                          | 416                    | 431               | 478        | 380                   | 454               | 355           | 348                  | 663                | 420                  | 265            | 337                    | 404        | 341                    |
| Yorkshire and the Humber, Deprivation Lev | 2078                 | 2007                   | 758                     | 1219       | 1190        | 517               | 574                  | 703                  | 597        | 752           | 633        | 475                          | 414                    | 396               | 484        | 356                   | 453               | 329           | 357                  | 647                | 561                  | 264            | 450                    | 349        | 368                    |
| North West England, Deprivation Level 1   | 1823                 | 2028                   | 821                     | 1297       | 1284        | 524               | 581                  | 727                  | 671        | 743           | 573        | 501                          | 441                    | 412               | 465        | 371                   | 454               | 342           | 382                  | 672                | 507                  | 267            | 466                    | 381        | 342                    |

Significantly lower than mean

Indistinguishable from mean

Significantly higher than mean



**Web Table 1: Percentage by the Indices of Deprivation 2010 (ID2010) deprivation quintile, for regions in England, 2013**

| Region                 | Deprivation Quintile |      |      |      |                       |
|------------------------|----------------------|------|------|------|-----------------------|
|                        | 1<br>(most deprived) | 2    | 3    | 4    | 5<br>(least deprived) |
| North East England     | 32.5                 | 23.4 | 15.6 | 15.0 | 13.4                  |
| North West England     | 32.8                 | 18.9 | 16.6 | 16.8 | 14.9                  |
| Yorkshire & The Humber | 27.8                 | 19.8 | 18.1 | 19.6 | 14.7                  |
| East Midlands          | 17.0                 | 19.5 | 19.9 | 21.1 | 22.4                  |
| West Midlands          | 28.9                 | 18.8 | 20.1 | 18.2 | 13.9                  |
| East of England        | 7.7                  | 16.7 | 21.7 | 25.3 | 28.6                  |
| Greater London         | 27.7                 | 30.5 | 19.7 | 14.2 | 7.9                   |
| South East England     | 7.3                  | 15.1 | 20.2 | 22.6 | 34.8                  |
| South West England     | 9.1                  | 19.1 | 26.6 | 24.5 | 20.7                  |

Source: Public Health England, Office for National Statistics mid year population estimates





|                                                                                                                                                                                                                                                                                                                                                                                   |                              |   |
|-----------------------------------------------------------------------------------------------------------------------------------------------------------------------------------------------------------------------------------------------------------------------------------------------------------------------------------------------------------------------------------|------------------------------|---|
| United Kingdom Vital Registration - Deaths 1997 ICD9 as it appears in World Health Organization (WHO). WHO Mortality Database Versio February 2014. Geneva, Switzerland: World Health Organization (WHO), 2014.                                                                                                                                                                   | 1997                         | * |
| United Kingdom Vital Registration - Deaths 1998 ICD9 as it appears in World Health Organization (WHO). WHO Mortality Database Versio February 2014. Geneva, Switzerland: World Health Organization (WHO), 2014.                                                                                                                                                                   | 1998                         |   |
| United Kingdom Vital Registration - Deaths 1999 ICD9 as it appears in World Health Organization (WHO). WHO Mortality Database Versio February 2014. Geneva, Switzerland: World Health Organization (WHO), 2014.                                                                                                                                                                   | 1999                         |   |
| United Kingdom Vital Registration - Deaths 2000 ICD9 as it appears in World Health Organization (WHO). WHO Mortality Database Versio February 2014. Geneva, Switzerland: World Health Organization (WHO), 2014.                                                                                                                                                                   |                              |   |
| United Kingdom Vital Registration - Deaths 2001 ICD10 as it appears in World Health Organization (WHO). WHO Mortality Database Versio February 2014. Geneva, Switzerland: World Health Organization (WHO), 2014.                                                                                                                                                                  | 2001                         |   |
| United Kingdom Vital Registration - Deaths 2002 ICD10 as it appears in World Health Organization (WHO). WHO Mortality Database Versio February 2014. Geneva, Switzerland: World Health Organization (WHO), 2014.                                                                                                                                                                  | 2002                         |   |
| United Kingdom Vital Registration - Deaths 2003 ICD10 as it appears in World Health Organization (WHO). WHO Mortality Database Versio February 2014. Geneva, Switzerland: World Health Organization (WHO), 2014.                                                                                                                                                                  | 2003                         |   |
| United Kingdom Vital Registration - Deaths 2004 ICD10 as it appears in World Health Organization (WHO). WHO Mortality Database Versio February 2014. Geneva, Switzerland: World Health Organization (WHO), 2014.                                                                                                                                                                  | 2004                         | * |
| United Kingdom Vital Registration - Deaths 2005 ICD10 as it appears in World Health Organization (WHO). WHO Mortality Database Versio February 2014. Geneva, Switzerland: World Health Organization (WHO), 2014.                                                                                                                                                                  | 2005                         |   |
| United Kingdom Vital Registration - Deaths 2006 ICD10 as it appears in World Health Organization (WHO). WHO Mortality Database Versio February 2014. Geneva, Switzerland: World Health Organization (WHO), 2014.                                                                                                                                                                  | 2006                         |   |
| United Kingdom Vital Registration - Deaths 2007 ICD10 as it appears in World Health Organization (WHO). WHO Mortality Database Versio February 2014. Geneva, Switzerland: World Health Organization (WHO), 2014.                                                                                                                                                                  | 2007                         |   |
| Max Planck Institute for Demographic Research, University of California. Human Mortality Database. Berkeley, USA: University of Californ Rostock, Germany: Max Planck Institute for Demographic Research.                                                                                                                                                                         | 1950-2000                    |   |
| World Health Organization (WHO). United Kingdom World Health Survey 2004. Geneva, Switzerland: World Health Organization (WHO), 2005.                                                                                                                                                                                                                                             | 2004                         |   |
| United Kingdom General Household Survey 1998-1999 as it appears in P.N. Lee Statistics and Computing. International Mortality and Smokir Statistics.                                                                                                                                                                                                                              | 1998-1999                    |   |
| Office of Population Censuses and Surveys. Social Survey Division, Health Survey for England, 1991-1992: Combined Data File. Colchester, Esse UK Data Archive [distributor], October 1997. SN: 3238, <a href="http://dx.doi.org/10.5255/UKDA-SN-3238-1">http://dx.doi.org/10.5255/UKDA-SN-3238-1</a>                                                                              | 1991-1992                    |   |
| Office of Population Censuses and Surveys. Social Survey Division, Health Survey for England, 1993 [Computer file]. Colchester, Essex: UK Da Archive [distributor], April 1995. SN: 3316, <a href="http://dx.doi.org/10.5255/UKDA-SN-3316-1">http://dx.doi.org/10.5255/UKDA-SN-3316-1</a>                                                                                         | 1993                         |   |
| Joint Health Surveys Unit of Social and Community Planning Research and University College London, Health Survey for England, 1994 [computi file]. 4th ed. Colchester, Essex: UK Data Archive [distributor], 26 March 2001. SN: 3640.                                                                                                                                             | 1994-1995                    |   |
| Joint Health Surveys Unit of Social and Community Planning Research and University College London, Health Survey for England, 1995 [computi file]. 3rd ed. Colchester, Essex: UK Data Archive [distributor], 26 March 2001. SN: 3796.                                                                                                                                             | 1995-1996                    |   |
| Joint Health Surveys Unit of Social and Community Planning Research and University College London, Health Survey for England, 1996 [computi file]. 3rd ed. Colchester, Essex: UK Data Archive [distributor], March 2001. SN: 3886.                                                                                                                                                | 1996-1997                    |   |
| Joint Health Surveys Unit of Social and Community Planning Research and University College London, Health Survey for England, 1997 [computi file]. 2nd ed. Colchester, Essex: UK Data Archive [distributor], 4 December 2000. SN: 3979.                                                                                                                                           | 1997-1998                    |   |
| National Centre for Social Research, University College London Department of Epidemiology and Public Health, Health Survey for England, 199 [computer file]. 4th ed. Colchester, Essex: UK Data Archive [distributor], 30 November 2002. SN: 4150.                                                                                                                                | 1998-1999                    |   |
| National Centre for Social Research and University College London. Department of Epidemiology and Public Health, Health Survey for England, 1999 [computer file]. 3rd Edition. Colchester, Essex: UK Data Archive [distributor], February 2002. SN: 4365.                                                                                                                         | 1999-2000                    | * |
| National Centre for Social Research, University College London Department of Epidemiology and Public Health, Health Survey for England, 200 [computer file]. Colchester, Essex: UK Data Archive [distributor], 23 April 2002. SN: 4487.                                                                                                                                           | 2000-2001                    |   |
| National Centre for Social Research and University College London. Department of Epidemiology and Public Health, Health Survey for England, 200 [computer file]. 2nd Edition. Colchester, Essex: UK Data Archive [distributor], June 2004. SN: 4628.                                                                                                                              | 2001-2002                    |   |
| National Centre for Social Research and University College London. Department of Epidemiology and Public Health, Health Survey for England, 200 [computer file]. Colchester, Essex: UK Data Archive [distributor], May 2004. SN: 4912.                                                                                                                                            | 2002-2003                    |   |
| National Centre for Social Research and University College London. Department of Epidemiology and Public Health, Health Survey for England, 200 [computer file]. Colchester, Essex: UK Data Archive [distributor], March 2005. SN: 5098.                                                                                                                                          | 2003-2004                    |   |
| National Centre for Social Research and University College London. Department of Epidemiology and Public Health, Health Survey for England, 200 [computer file]. Colchester, Essex: UK Data Archive [distributor], July 2006. SN: 5439.                                                                                                                                           | 2004-2005                    | * |
| National Centre for Social Research and University College London. Department of Epidemiology and Public Health, Health Survey for England, 200 [computer file]. Colchester, Essex: UK Data Archive [distributor], July 2007. SN: 5675.                                                                                                                                           | 2005-2006                    |   |
| [computer file]. 4th Edition. Colchester, Essex: UK Data Archive [distributor], July 2011. SN: 5809, <a href="http://dx.doi.org/10.5255/UKDA-SN-5809-1">http://dx.doi.org/10.5255/UKDA-SN-5809-1</a>                                                                                                                                                                              | 2006-2007                    |   |
| Office of Population Censuses and Surveys (United Kingdom), Minnesota Population Center. United Kingdom Census 1991 from the Integrated Public Use Microdata Series, International: [Machine-readable database]. Minneapolis: University of Minnesota.                                                                                                                            | 1991                         |   |
| United Kingdom Vital Registration - Deaths 2009 ICD10 as it appears in World Health Organization (WHO). WHO Mortality Database Versio February 2014. Geneva, Switzerland: World Health Organization (WHO), 2014.                                                                                                                                                                  | 2009                         |   |
| United Kingdom Vital Registration - Deaths 2008 ICD10 as it appears in World Health Organization (WHO). WHO Mortality Database Versio February 2014. Geneva, Switzerland: World Health Organization (WHO), 2014.                                                                                                                                                                  | 2008                         | * |
| Institute for Social and Economic Research, University of Essex, GfK NOP, Office for National Statistics (ONS) (United Kingdom), Economic and Social Research Council (ESRC). United Kingdom British Household Panel Survey 1992-1993. Essex, United Kingdom: Institute for Social and Economic Research, University of Essex.                                                    | 1992-1993                    |   |
| Institute for Social and Economic Research, University of Essex, GfK NOP, Office for National Statistics (ONS) (United Kingdom), Economic and Social Research Council (ESRC). United Kingdom British Household Panel Survey 1993-1994. Essex, United Kingdom: Institute for Social and Economic Research, University of Essex.                                                    | 1993-1994                    |   |
| Institute for Social and Economic Research, University of Essex, GfK NOP, Office for National Statistics (ONS) (United Kingdom), Economic and Social Research Council (ESRC), Health Education Authority (HEA) (United Kingdom). United Kingdom British Household Panel Survey 1994-1995. Essex, United Kingdom: Institute for Social and Economic Research, University of Essex. | 1994-1995                    |   |
| Institute for Social and Economic Research, University of Essex, GfK NOP, Office for National Statistics (ONS) (United Kingdom), Economic and Social Research Council (ESRC), Health Education Authority (HEA) (United Kingdom). United Kingdom British Household Panel Survey 1995-1996. Essex, United Kingdom: Institute for Social and Economic Research, University of Essex. | 1995-1996                    |   |
| Institute for Social and Economic Research, University of Essex, GfK NOP, Office for National Statistics (ONS) (United Kingdom), Economic and Social Research Council (ESRC), Health Education Authority (HEA) (United Kingdom). United Kingdom British Household Panel Survey 1996-1997. Essex, United Kingdom: Institute for Social and Economic Research, University of Essex. | 1996-1997                    |   |
| Institute for Social and Economic Research, University of Essex, GfK NOP, Office for National Statistics (ONS) (United Kingdom), Economic and Social Research Council (ESRC), Health Education Authority (HEA) (United Kingdom). United Kingdom British Household Panel Survey 1997-1998. Essex, United Kingdom: Institute for Social and Economic Research, University of Essex. | 1997-1998                    |   |
| Institute for Social and Economic Research, University of Essex, GfK NOP, Office for National Statistics (ONS) (United Kingdom), Economic and Social Research Council (ESRC), Health Education Authority (HEA) (United Kingdom). United Kingdom British Household Panel Survey 1998-1999. Essex, United Kingdom: Institute for Social and Economic Research, University of Essex. | 1998-1999                    |   |
| Institute for Social and Economic Research, University of Essex, GfK NOP, Office for National Statistics (ONS) (United Kingdom), Economic and Social Research Council (ESRC), Health Education Authority (HEA) (United Kingdom). United Kingdom British Household Panel Survey 1999-2000. Essex, United Kingdom: Institute for Social and Economic Research, University of Essex. | 1999-2000                    |   |
| Institute for Social and Economic Research, University of Essex, GfK NOP, Office for National Statistics (ONS) (United Kingdom), Economic and Social Research Council (ESRC), Health Development Agency (United Kingdom). United Kingdom British Household Panel Survey 2000-2001. Essex, United Kingdom: Institute for Social and Economic Research, University of Essex.        | 2000-2001                    |   |
| Food and Agriculture Organization of the United Nations (FAO). United Kingdom FAOSTAT Food Balance Sheets. Rome, Italy: Food and Agriculture Organization of the United Nations (FAO).                                                                                                                                                                                            | 1990, 1995, 2000, 2005, 2009 |   |
| United Nations Children's Fund (UNICEF), World Health Organization (WHO). WHO and UNICEF Reported Disease Incidence Time Series Pertussis. Geneva, Switzerland: World Health Organization (WHO).                                                                                                                                                                                  | 1980-1998, 2000-2010         |   |



|                                                                                                                                                                                                                                                                                                                                                     |                            |   |
|-----------------------------------------------------------------------------------------------------------------------------------------------------------------------------------------------------------------------------------------------------------------------------------------------------------------------------------------------------|----------------------------|---|
| Royal College of General Practitioners. United Kingdom - England and Wales Weekly Returns Service Annual Report 2009. London, United Kingdom                                                                                                                                                                                                        | 2000                       |   |
| Royal College of General Practitioners.                                                                                                                                                                                                                                                                                                             |                            |   |
| Royal College of General Practitioners. United Kingdom - England and Wales Weekly Returns Service Annual Report 2005. London, United Kingdom                                                                                                                                                                                                        | 2005                       |   |
| Royal College of General Practitioners.                                                                                                                                                                                                                                                                                                             |                            |   |
| United Nations Office on Drugs and Crime (UNODC). United Nations Surveys on Crime Trends and the Operations of Criminal Justice Systems 1972-2006 as provided by Kavi Bhalla. [Unpublished].                                                                                                                                                        | 1981-1994                  |   |
| World Health Organization (WHO). Global Status Report on Road Safety 2009. Geneva, Switzerland: World Health Organization (WHO), 2009.                                                                                                                                                                                                              | 2007                       |   |
| United Kingdom Vital Registration - Deaths 2010 ICD10 as it appears in World Health Organization (WHO). WHO Mortality Database Versio February 2014. Geneva, Switzerland: World Health Organization (WHO), 2014.                                                                                                                                    | 2010                       | * |
| National Centre for Social Research and University College London. Department of Epidemiology and Public Health, Health Survey for England, 2007 [computer file]. 2nd Edition. Colchester, Essex: UK Data Archive [distributor], April 2010. SN: 6112, http://dx.doi.org/10.5255/UKDA-SN-6112-1                                                     | 2007-2008                  |   |
| National Centre for Social Research and University College London. Department of Epidemiology and Public Health, Health Survey for England, 2008 [computer file]. 3rd Edition. Colchester, Essex: UK Data Archive [distributor], July 2011. SN: 6397, http://dx.doi.org/10.5255/UKDA-SN-6397-1                                                      | 2008-2009                  |   |
| National Centre for Social Research and University College London. Department of Epidemiology and Public Health, Health Survey for England, 2009 [computer file]. 2nd Edition. Colchester, Essex: UK Data Archive [distributor], July 2011. SN: 6732, http://dx.doi.org/10.5255/UKDA-SN-6732-1                                                      | 2009-2010                  | * |
| NatCen Social Research and Royal Free and University College Medical School. Department of Epidemiology and Public Health, Health Survey for England, 2010 [computer file]. 2nd Edition. Colchester, Essex: UK Data Archive [distributor], July 2012. SN: 6986, http://dx.doi.org/10.5255/UKDA-SN-6986-2                                            | 2010                       | * |
| NatCen Social Research and University College London. Department of Epidemiology and Public Health, Health Survey for England, 2011 [computer file]. Colchester, Essex: UK Data Archive [distributor], April 2013. SN: 7260, http://dx.doi.org/10.5255/UKDA-SN-7260-1                                                                               | 2011-2012                  | * |
| Stewart S, Hart CL, Hole DJ, McMurray JJ. A population-based study of the long-term risks associated with atrial fibrillation: 20-year follow-up of the Renfrew/Paisley study. <i>Am J Med.</i> 2002; 113(5): 359-64.                                                                                                                               | 1980-1996                  |   |
| Lip GY, Golding DJ, Nazir M, Beevers DG, Child DL, Fletcher RI. A survey of atrial fibrillation in general practice: the West Birmingham Atrial Fibrillation Project. <i>Br J Gen Pract.</i> 1997; 47(418): 285-9.                                                                                                                                  | 1995                       |   |
| Lip GY, Bawden L, Hodson R, Rutland E, Snatchfold J, Beevers DG. Atrial fibrillation amongst the Indo-Asian general practice population: The West Birmingham Atrial Fibrillation Project. <i>Int J Cardiol.</i> 1998; 65(2): 187-92.                                                                                                                | 1996                       |   |
| O'Connell JE, Gray CS. Atrial Fibrillation and Stroke Prevention in the Community. <i>Age Ageing.</i> 1996; 25(4): 307-30                                                                                                                                                                                                                           | 1995                       |   |
| Riethbrock S, Heeley E, Plumb J, van Sta T. Chronic atrial fibrillation: incidence, prevalence, and prediction of stroke using the Congestive heart failure, Hypertension, Age >75, Diabetes mellitus, and prior Stroke or transient ischemic attack (CHADS2) risk stratification scheme. <i>Am Heart J.</i> 2008; 156(1): 57-64.                   | 1987-2005                  |   |
| Carroll K, Majeed A. Comorbidity associated with atrial fibrillation: a general practice-based study. <i>Br J Gen Pract.</i> 2001; 51(472): 884-91.                                                                                                                                                                                                 | 1999                       |   |
| Sudlow M, Thomson R, Thwaites B, Rodgers H, Kenny RA. Prevalence of atrial fibrillation and eligibility for anticoagulants in the community. <i>Lancet.</i> 1998; 352(9135): 1167-71.                                                                                                                                                               | 1996-1997                  |   |
| De Lusignan S, Van Vlymen J, Hague N, Thana L, Dzegah B, Chan T. Preventing stroke in people with atrial fibrillation: a cross-sectional study <i>Public Health (Oxf).</i> 2005; 27(1): 85-92.                                                                                                                                                      | 2004                       |   |
| Hill JD, Mottram EM, Killeen PD. Study of the prevalence of atrial fibrillation in general practice patients over 65 years of age. <i>J R Coll Gen Pract.</i> 1987; 37(297): 172-3.                                                                                                                                                                 | 1983-1984                  |   |
| Majeed A, Moser K, Carroll K. Trends in the prevalence and management of atrial fibrillation in general practice in England and Wales, 1994-1999: analysis of data from the general practice research database. <i>Heart.</i> 2001; 86(3): 284-288.                                                                                                 | 1994-1998                  |   |
| DeWilde S, Carey IM, Emmas C, Richards N, Cook DG. Trends in the prevalence of diagnosed atrial fibrillation, its treatment with anticoagulation and predictors of such treatment in UK primary care. <i>Heart.</i> 2006; 92(8): 1064-70.                                                                                                           | 1994-2003                  |   |
| Almeida AM, Henthorn JS, Davies SC. Neonatal screening for haemoglobinopathies: the results of a 10-year programme in an English Health Region <i>Br J Haematol.</i> 2001; 112(1): 32-5.                                                                                                                                                            | 1990-2000                  |   |
| Davies SC, Cronin E, Gill M, Greengross P, Hickman M, Normand C. Screening for sickle cell disease and thalassaemia: a systematic review with supplementary research. <i>Health Technol Assess.</i> 2000; 4(3): 1-99.                                                                                                                               | 1998                       |   |
| Mann JR. Sickle cell haemoglobinopathies in England. <i>Arch Dis Child.</i> 1981; 56(9): 676-83                                                                                                                                                                                                                                                     | 1969-1979                  |   |
| Modell B, Darlison M, Birgens H, Cario H, Faustino P, Giordano PC, Gulbis B, Hopmeier P, Lena-Russo D, Romao L, Theodorsson E. Epidemiology of haemoglobin disorders in Europe: an overview. <i>Scand J Clin Lab Invest.</i> 2007; 67(1): 39-69.                                                                                                    | 1988, 2006                 |   |
| Centre for Health Informatics and Multiprofessional Education, University College London. Modell's Haemoglobinopathologist's Almanac. London, United Kingdom: Centre for Health Informatics and Multiprofessional Education, University College London, 2008.                                                                                       | 1988, 2003, 2004-2007      |   |
| Streety A, Clarke M, Downing M, Farrar L, Foo Y, Hall K, Kemp H, Newbold J, Walsh P, Yates J, Henthorn J. Implementation of the newborn screening programme for sickle cell disease in England: results for 2003-2005. <i>J Med Screen.</i> 2008; 15(1): 9-13.                                                                                      | 2004-2007                  |   |
| Streety A, Latinovic R, Hall K, Henthorn J. Implementation of universal newborn bloodspot screening for sickle cell disease and other clinical significant haemoglobinopathies in England: screening results for 2005-7. <i>J Clin Pathol.</i> 2009; 62(1): 26-30.                                                                                  | 2005-2007                  |   |
| Weatherall D. Sickle Cell and Thalassemias Prevalence Data, Personal Correspondence with David Weatherall. [Unpublished]                                                                                                                                                                                                                            | 2009                       |   |
| Garraway WM, Collins GN, Lee RJ. High prevalence of benign prostatic hypertrophy in the community. <i>Lancet.</i> 1991; 338(8765): 469-71.                                                                                                                                                                                                          | 1990                       |   |
| Mair FS, Crowley TS, Bundred PE. Prevalence, aetiology and management of heart failure in general practice. <i>Br J Gen Pract.</i> 1996; 46(403): 77-9.                                                                                                                                                                                             | 1994                       |   |
| Berzon DB. Ear disease in a group general practice A review of world communities. <i>J Laryngol Otol.</i> 1983; 97(9): 817-2.                                                                                                                                                                                                                       | 1970-1976                  |   |
| Browning GG, Gatehouse S. The prevalence of middle ear disease in the adult British population. <i>Clin Otolaryngol Allied Sci.</i> 1992; 17(4): 317-21.                                                                                                                                                                                            | 1980-1986                  |   |
| Stathakis V, Kilkenny M, Marks R. Descriptive epidemiology of acne vulgaris in the community. <i>Australas J Dermatol.</i> 1997; 38(3): 115-23.                                                                                                                                                                                                     | 1987-1988                  |   |
| Williams H, Stewart A, Von Mutius E, Cookson W, Anderson HR. Is eczema really on the increase worldwide. <i>J Allergy Clin Immunol.</i> 2008; 121(4): 947-954.                                                                                                                                                                                      | 1992, 1995-1996, 2001-2002 |   |
| United Nations Office on Drugs and Crime (UNODC). United Nations Office on Drugs and Crime Global Study on Homicides 2011. Vienna, Austria: United Nations Office on Drugs and Crime (UNODC), 2011.                                                                                                                                                 | 1998-2010                  |   |
| Deshpande SA, Northern V. The clinical and health economic burden of respiratory syncytial virus disease among children under 2 years of age in defined geographical area. <i>Arch Dis Child.</i> 2003; 12(88): 1065-9.                                                                                                                             | 1996-1999                  |   |
| Fox KF, Cowie MR, Wood DA, Coats AJS, Gibbs JSR, Turner RM, Poole-Wilson PA, Davies SW, Sutton GC. Coronary artery disease as the cause of incident heart failure in the population. <i>Eur Heart J.</i> 2001; 22(3): 228-36.                                                                                                                       | 1998, 2000-2001            |   |
| de Giuli F, Khaw KT, Cowie MR, Sutton GC, Ferrari R, Poole-Wilson PA. Incidence and outcome of persons with a clinical diagnosis of heart failure in a general practice population of 696,884 in the United Kingdom. <i>Eur J Heart Fail.</i> 2005; 7(3): 295-302.                                                                                  | 1991-1994                  |   |
| Jones IR, Urwin G, Feldman RA, Banatvala N. Social deprivation and bacterial meningitis in north east Thames region: three year study using smc area statistics. <i>BMJ.</i> 1997; 314(7083): 794-5.                                                                                                                                                | 1991-1993                  |   |
| Forster J, Guarino A, Perez N, Moraga F, Román E, Mory O, Tozzi AE, de Aguilera AL, Wahn U, Graham C, Berner R, Ninan T, Barberousse C, Meyer N, Soriano-Gabarró M. Hospital-based surveillance to estimate the burden of rotavirus gastroenteritis among European children younger than 5 years of age. <i>Pediatrics.</i> 2009; 123(3): e393-400. | 2005-2006                  |   |
| Watson B, Ellis M, Mandal B, Dunbar E, Whale K, Brennan J. A comparison of the clinico-pathological features with stool pathogens in patient hospitalised with the symptom of diarrhoea. <i>J Infect Dis.</i> 1986; 18(6): 553-9.                                                                                                                   | 1981-1982                  |   |
| Lacey RJ, Lewis M, Sim J. Presentation of pain drawings in questionnaire surveys: influence on prevalence of neck and upper limb pain in the community. <i>Pain.</i> 2003; 105(1-2): 293-301.                                                                                                                                                       | 2000                       |   |
| Palmer KT, Walker-Bone K, Griffin MJ, Syddall H, Pannett B, Coggon D, Cooper C. Prevalence and occupational associations of neck pain in the British population. <i>Scand J Work Environ Health.</i> 2001; 27(1): 49-56.                                                                                                                            | 1997-1998                  |   |
| Sim J, Lacey RJ, Lewis M. The impact of workplace risk factors on the occurrence of neck and upper limb pain: a general population study. <i>BMJ Public Health.</i> 2006; 6(1): 234.                                                                                                                                                                | 2001-2002                  |   |
| Thomas E, Peat G, Harris L, Wilkie R, Croft PR. The prevalence of pain and pain interference in a general population of older adults: cross-sectional findings from the North Staffordshire Osteoarthritis Project (NorStOP). <i>Pain.</i> 2004; 110(1-2): 361-8.                                                                                   | 2001                       |   |
| Urwin M, Symmons D, Allison T, Brammah T, Busby H, Roxby M, Simmons A, Williams G. Estimating the burden of musculoskeletal disorders in the community: the comparative prevalence of symptoms at different anatomical sites, and the relation to social deprivation. <i>Ann Rheum Dis.</i> 1998; 57(11): 649-55.                                   | 1995                       |   |
| Webb R, Brammah T, Lunt M, Urwin M, Allison T, Symmons D. Prevalence and predictors of intense, chronic, and disabling neck and back pain in the UK general population. <i>Spine.</i> 2003; 28(11): 1195-202.                                                                                                                                       | 2000                       |   |
| Lampe FC, Whincup PH, Wannamethee SG, Shaper AG, Walker M, Ebrahim S. The natural history of prevalent ischaemic heart disease in middle-aged men. <i>Eur Heart J.</i> 2000; 21(13): 1052-62.                                                                                                                                                       | 1980-1995                  |   |

|                                                                                                                                                                                                                                                                                                                |                      |
|----------------------------------------------------------------------------------------------------------------------------------------------------------------------------------------------------------------------------------------------------------------------------------------------------------------|----------------------|
| Lampe F, Morris R, Whincup P, Walker M, Ebrahim S, Shaper A. Is the prevalence of coronary heart disease falling in British men? <i>Heart</i> . 2000; 86(5): 499-505.                                                                                                                                          | 1992, 1996           |
| Murphy NF, Stewart S, Hart CL, MacIntyre K, Hole D, McMurray JJV. A population study of the long-term consequences of Rose angina: 20-year follow-up of the Renfrew-Paisley study. <i>Heart</i> . 2006; 92(12): 1739-46.                                                                                       | 1980-1996            |
| Douglas KA, Redman CWG. Eclampsia in the United Kingdom. <i>BMJ</i> . 1994; 309(6966): 1395-400.                                                                                                                                                                                                               | 1992                 |
| Telfer P, Coen P, Chakravorty S, Wilkey O, Evans J, Newell H, Smalling B, Amos R, Stephens A, Rogers D, Kirkham F. Clinical outcomes in children with sickle cell disease living in England: a neonatal cohort in East London. <i>Haematologica</i> . 2007; 92(7): 905-12.                                     | 1983-2005            |
| Bath-Hextall F, Leonardi-Bee J, Smith C, Mead A, Hubbard R. Trends in incidence of skin basal cell carcinoma. Additional evidence from a UK primary care database study. <i>Int J Cancer</i> . 2007; 121(9): 2105-8.                                                                                           | 1996-2003            |
| Modell B, Khan M, Darlison M. Survival in beta-thalassaemia major in the UK. <i>Lancet</i> . 2000; 355(9220): 2051-2.                                                                                                                                                                                          | 1950-1998            |
| Modell B, Khan M, Darlison M, Westwood MA, Ingram D, Pennell DJ. Improved survival of thalassaemia major in the UK and relation to T2 cardiovascular magnetic resonance. <i>J Cardiovasc Magn Reson</i> . 2008; 10(1): 42.                                                                                     | 1960-2003            |
| World Health Organization (WHO). Yellow Fever Reported Cases, WHO Vaccine-Preventable Diseases: Monitoring System. Geneva, Switzerland: World Health Organization (WHO).                                                                                                                                       | 2000-2003, 2005-2009 |
| Mikulic TR, Farrar JT, Bilker WB, Fernandes S, Schumacher HR Jr, Saag KG. Gout epidemiology: results from the UK General Practice Research Database, 1990-1999. <i>Ann Rheum Dis</i> . 2005; 64(2): 267-72.                                                                                                    | 1990-1999            |
| Currie WJ. Prevalence and incidence of the diagnosis of gout in Great Britain. <i>Ann Rheum Dis</i> . 1979; 38(2): 101-4.                                                                                                                                                                                      | 1971-1975            |
| Cea Soriano L, Rothenbacher D, Choi HK, Garcia Rodriguez LA. Contemporary epidemiology of gout in the UK general population. <i>Arthritis Res Ther</i> . 2011; 13(2): R39.                                                                                                                                     | 2000-2007            |
| Annemans L, Spaepen E, Gaskin M, Bonnemaire M, Malier V, Gilbert T, Nuki G. Gout in the UK and Germany: prevalence, comorbidities and management in general practice 2000-2005. <i>Ann Rheum Dis</i> . 2008; 67(7): 960-6.                                                                                     | 2000-2005            |
| Harris CM, Lloyd DC, Lewis J. The prevalence and prophylaxis of gout in England. <i>J Clin Epidemiol</i> . 1995; 48(9): 1153-6.                                                                                                                                                                                | 1993                 |
| Gardner MJ, Power C, Barker DJ, Paddy R. The prevalence of gout in three English towns. <i>Int J Epidemiol</i> . 1982; 11(1): 71-.                                                                                                                                                                             | 1979                 |
| Gribbin J, Hubbard RB, Le Jeune I, Smith CJ, West J, Tata LJ. Incidence and mortality of idiopathic pulmonary fibrosis and sarcoidosis in the UK. <i>Thorax</i> . 2006; 61(11): 980-5.                                                                                                                         | 1991-2003            |
| Rice-Oxley M, Williams ES, Rees JE. A prevalence survey of multiple sclerosis in Sussex. <i>J Neurol Neurosurg Psychiatry</i> . 1995; 58(1): 27-30.                                                                                                                                                            | 1991                 |
| Sharpe G, Price SE, Last A, Thompson RJ. Multiple sclerosis in island populations: prevalence in the Bailiwicks of Guernsey and Jersey. <i>J Neurol Neurosurg Psychiatry</i> . 1995; 58(1): 22-6.                                                                                                              | 1991                 |
| Mumford CJ, Fraser MB, Wood NW, Compston DA. Multiple sclerosis in the Cambridge health district of east Anglia. <i>J Neurol Neurosurg Psychiatry</i> . 1992; 55(10): 877-82.                                                                                                                                  | 1989-1991            |
| Williams ES, McKernan RO. Prevalence of multiple sclerosis in a south London borough. <i>Br Med J (Clin Res Ed)</i> . 1986; 293(6541): 237-9.                                                                                                                                                                  | 1976-1985            |
| Lockyer MJ. Prevalence of multiple sclerosis in five rural Suffolk practices. <i>BMJ</i> . 1991; 303(6798): 347-3.                                                                                                                                                                                             | 1988                 |
| Shepherd DI, Summers A. Prevalence of multiple sclerosis in Rochdale. <i>J Neurol Neurosurg Psychiatry</i> . 1996; 61(4): 415-7.                                                                                                                                                                               | 1989                 |
| Ford HL, Gerry E, Airey CM, Vail A, Johnson MH, Williams DRR. The prevalence of multiple sclerosis in the Leeds Health Authority. <i>J Neurol Neurosurg Psychiatry</i> . 1998; 64(5): 605-10.                                                                                                                  | 1996                 |
| Roberts MH, Martin JP, McLellan DL, McIntosh-Michaelis SA, Spackman AJ. The prevalence of multiple sclerosis in the Southampton and South West Hampshire Health Authority. <i>J Neurol Neurosurg Psychiatry</i> . 1991; 54(1): 55-9.                                                                           | 1987                 |
| Worldwide variations in the prevalence of asthma symptoms: the International Study of Asthma and Allergies in Childhood (ISAAC). <i>Eur Respir J</i> . 1998; 12(2): 315-35.                                                                                                                                    | 1993-1995            |
| Lai CK, Beasley R, Crane J, Foliaki S, Shah J, Weiland S. Global variation in the prevalence and severity of asthma symptoms: phase three of the International Study of Asthma and Allergies in Childhood (ISAAC). <i>Thorax</i> . 2009; 64(6): 476-483.                                                       | 2002                 |
| Stamatakis E, Primates P. Department of Epidemiology and Public Health, University College London, National Centre for Social Research (NatCen). Health Survey for England 2001: Respiratory Symptoms, Atopic Conditions and Lung Function. London, United Kingdom: The Stationery Office, 2003.               | 2001                 |
| Tesfaye S, Stevens LK, Stephenson JM, Fuller JH, Plater M, Ionescu-Tirgoviste C, Nuber A, Pozza G, Ward JD. Prevalence of diabetic peripheral neuropathy and its relation to glycaemic control and potential risk factors: the EURODIAB IDDM Complications Study. <i>Diabetologia</i> . 1996; 39(11): 1377-84. | 1993-1995            |
| Young MJ, Boulton AJ, MacLeod AF, Williams DR, Sonksen PH. A multicentre study of the prevalence of diabetic peripheral neuropathy in the United Kingdom hospital clinic population. <i>Diabetologia</i> . 1993; 36(2): 150-4.                                                                                 | 1990                 |
| Sampson MJ, Shephson L, Greenwood RH, Harvey I, Humphries J, Heyburn PJ, Temple RC, Dole G. An integrated mobile foot and retinal screening programme for people with Type 2 diabetes managed in primary care. <i>Diabet Med</i> . 2002; 19(1): 74-6.                                                          | 1997-2001            |
| Walters DP, Gatling W, Mullee MA, Hill RD. The prevalence of diabetic distal sensory neuropathy in an English community. <i>Diabet Med</i> . 1992; 9(4): 349-53.                                                                                                                                               | 1989-1991            |
| World Health Organization (WHO). WHO MONICA Project Investigators 2000. MONICA Population Survey Data Book 1979-1997. Geneva Switzerland: World Health Organization (WHO), 2000.                                                                                                                               | 1984-1995            |
| United Kingdom Smoking and Drinking Among Adults 2007 as it appears in World Health Organization (WHO). WHO Global Info-base - Tobacco Use Prevalence.                                                                                                                                                         | 2003-2007            |
| United Kingdom General Household Survey 1992 as it appears in P.N. Lee Statistics and Computing. International Mortality and Smoking Statistics.                                                                                                                                                               | 1992                 |
| United Kingdom General Household Survey 1990 as it appears in P.N. Lee Statistics and Computing. International Mortality and Smoking Statistics.                                                                                                                                                               | 1990                 |
| United Kingdom General Household Survey 1988 as it appears in P.N. Lee Statistics and Computing. International Mortality and Smoking Statistics.                                                                                                                                                               | 1988                 |
| United Kingdom General Household Survey 1986 as it appears in P.N. Lee Statistics and Computing. International Mortality and Smoking Statistics.                                                                                                                                                               | 1986                 |
| United Kingdom General Household Survey 1982 as it appears in P.N. Lee Statistics and Computing. International Mortality and Smoking Statistics.                                                                                                                                                               | 1982                 |
| United Kingdom General Household Survey 1984 as it appears in P.N. Lee Statistics and Computing. International Mortality and Smoking Statistics.                                                                                                                                                               | 1984                 |
| United Kingdom General Household Survey 2001 as it appears in P.N. Lee Statistics and Computing. International Mortality and Smoking Statistics.                                                                                                                                                               | 2001                 |
| United Kingdom General Household Survey 2000 as it appears in P.N. Lee Statistics and Computing. International Mortality and Smoking Statistics.                                                                                                                                                               | 2000                 |
| United Kingdom General Household Survey 1996 as it appears in P.N. Lee Statistics and Computing. International Mortality and Smoking Statistics.                                                                                                                                                               | 1996                 |
| United Kingdom General Household Survey 1994 as it appears in P.N. Lee Statistics and Computing. International Mortality and Smoking Statistics.                                                                                                                                                               | 1994                 |
| Edmonds M, Boulton A, Buckenham T, Every N, Foster A, Freeman D, Gadsby R, Gibby O, Knowles A, Pooke M, Tovey F, Unwin N, Wolfe J. Rep of the Diabetic Foot and Amputation Group. <i>Diabet Med</i> . 1996; 13(9 Suppl 4): S27-42.                                                                             | 1993                 |
| Abbott CA, Malik RA, van Ross ER, Kulkarni J, Boulton AJ. Prevalence and characteristics of painful diabetic neuropathy in a large community-based diabetic population in the U.K. <i>Diabetes Care</i> . 2011; 34(10): 2220-4.                                                                                | 2006-2010            |
| Rubino A, Rousculp MD, Davis K, Wang J, Girach A. Diagnosed diabetic retinopathy in France, Italy, Spain, and the United Kingdom. <i>Prim Care Diabetes</i> . 2007; 1(2): 75-80.                                                                                                                               | 2006                 |
| Pannell RS, Fleming DM, Cross KW. The incidence of molluscum contagiosum, scabies and lichen planus. <i>Epidemiol Infect</i> . 2005; 133(6): 985-91.                                                                                                                                                           | 1994-2003            |
| DECODE Study Group. Age- and sex-specific prevalences of diabetes and impaired glucose regulation in 13 European cohorts. <i>Diabetes Care</i> . 2003; 26(1): 61-9.                                                                                                                                            | 1993                 |
| Swerdlow AJ, Jones ME. Mortality during 25 years of follow-up of a cohort with diabetes. <i>Int J Epidemiol</i> . 1996; 25(6): 1250-61.                                                                                                                                                                        | 1966-1992            |
| Laing SP, Swerdlow AJ, Slater SD, Botha JL, Burden AC, Waugh NR, Smith AW, Hill RD, Bingley PJ, Patterson CC, Qiao Z, Keen H. The British Diabetic Association Cohort Study. I: all-cause mortality in patients with insulin-treated diabetes mellitus. <i>Diabet Med</i> . 1999; 16(6): 459-65.               | 1972-1997            |
| Crosson SC, Burden AC, Bodington M, Botha JL. The prevalence of diabetes in elderly people. <i>Diabet Med</i> . 1991; 8(1): 28-3.                                                                                                                                                                              | 1987                 |
| Pierce MB, Zaninotto P, Steel N, Mindell J. Undiagnosed diabetes-data from the English longitudinal study of ageing. <i>Diabet Med</i> . 2009; 26(7): 67-85.                                                                                                                                                   | 2005                 |
| Abu-Arefeh I, Russell G. Prevalence of headache and migraine in schoolchildren. <i>BMJ</i> . 1994; 309(6957): 765-5.                                                                                                                                                                                           | 1991                 |
| Steiner TJ, Secher AI, Stewart WF, Kolodner K, Liberman J, Lipton RB. The prevalence and disability burden of adult migraine in England and the relationships to age, gender and ethnicity. <i>Cephalalgia</i> . 2003; 23(7): 519-27.                                                                          | 2000                 |
| Royal College of General Practitioners. United Kingdom - England and Wales Weekly Returns Service Annual Prevalence Report 2004. London United Kingdom: Royal College of General Practitioners.                                                                                                                | 2001                 |

|                                                                                                                                                                                                                                                                                                                                                                                                                          |                       |   |
|--------------------------------------------------------------------------------------------------------------------------------------------------------------------------------------------------------------------------------------------------------------------------------------------------------------------------------------------------------------------------------------------------------------------------|-----------------------|---|
| Nevitt GJ, Hutchinson PE. Psoriasis in the community: prevalence, severity and patients' beliefs and attitudes towards the disease. <i>Br J Dermatol</i> . 1993; 135(4): 533-7.                                                                                                                                                                                                                                          | 1995                  |   |
| Badley EM, Tennant A. Changing profile of joint disorders with age: findings from a postal survey of the population of Calderdale, West Yorkshire. <i>Ann Rheum Dis</i> . 1992; 51(3): 366-71.                                                                                                                                                                                                                           | 1986                  |   |
| Birrell F, Lunt M, Macfarlane G, Silman A. Association between pain in the hip region and radiographic changes of osteoarthritis: results from population-based study. <i>Rheumatology</i> . 2005; 44(3): 337-41.                                                                                                                                                                                                        | 2002                  |   |
| Croft P, Coggon D, Cruddas M, Cooper C. Osteoarthritis of the hip: an occupational disease in farmers. <i>BMJ</i> . 1992; 304(6837): 1269-72.                                                                                                                                                                                                                                                                            | 1989                  |   |
| Dawson J, Linsell L, Zondervan K, Rose P, Randall T, Carr A, Fitzpatrick R. Epidemiology of hip and knee pain and its impact on overall health status in older adults. <i>Rheumatology</i> . 2004; 43(4): 497-504.                                                                                                                                                                                                       | 2002                  |   |
| Nüesch E, Dieppe P, Reichenbach S, Williams S, Hf S, Jüni P. All cause and disease specific mortality in patients with knee or hip osteoarthritis: population based cohort study. <i>BMJ</i> . 2011; 342: d1165.                                                                                                                                                                                                         | 1994-2008             |   |
| Watson DJ, Rhodes T, Guess HA. All-cause mortality and vascular events among patients with rheumatoid arthritis, osteoarthritis, or no arthritis in the UK General Practice Research Database. <i>J Rheumatol</i> . 2003; 30(6): 1196-202.                                                                                                                                                                               | 1987-2000             |   |
| Konstantinou GN, Papadopoulos NG, Tavladaki T, Tsekoura T, Tsilimigaki A, Grattan CEH. Childhood acute urticaria in northern and southern Europe shows a similar epidemiological pattern and significant meteorological influences. <i>Pediatr Allergy Immunol</i> . 2011; 22(1 Pt 1): 36-42.                                                                                                                            | 2005-2007             | * |
| Jarvis D, Newson R, Lotvall J, Hastan D, Tomassen P, Keil T, Gjomarkaj M, Forsberg B, Gunnbjornsdottir M, Minov J, Brozek G, Dahlen SE, Toskala E, Kowalski ML, Olze H, Howarth P, Krämer U, Baclum J, Loureiro C, Kasper L, Bousquet PJ, Bousquet J, Bachert C, Fokkens W, Burney P. Asthma in adults and its association with chronic rhinosinusitis: the GA2LEN survey in Europe. <i>Allergy</i> . 2012; 67(1): 91-8. | 2008-2009             | * |
| Shiue I. Associated social factors of prevalent asthma in adults and the very old in the UK. <i>Allergy</i> . 2013; 68(3): 392.                                                                                                                                                                                                                                                                                          | 2009-2010             | * |
| Duncan R, Francis RM, Collerton J, Davies K, Jagger C, Kingston A, Kirkwood T, Robinson L, Birrell F. Prevalence of arthritis and joint pain in the oldest old: findings from the Newcastle 85+ study. <i>Age Ageing</i> . 2011; 40(6): 752-5.                                                                                                                                                                           | 2008-2010             | * |
| Leyland KM, Hart DJ, Javadi MK, Judge A, Kiran A, Soni A, Goulston LM, Cooper C, Spector TD, Arden NK. The natural history of radiographic knee osteoarthritis: a fourteen-year population-based cohort study. <i>Arthritis Rheum</i> . 2012; 64(7): 2243-51.                                                                                                                                                            | 1990-2004             | * |
| Fleming KM, Athal GP, Solaymani-Dodaran M, Card TR, West J. Incidence and prevalence of cirrhosis in the United Kingdom, 1992-2001: a general population-based study. <i>J Hepatol</i> . 2008; 49(5): 732-8.                                                                                                                                                                                                             | 1992-2001             |   |
| Mathur R, Pollara E, Hull S, Schofield P, Ashworth M, Robson J. Ethnicity and stroke risk in patients with atrial fibrillation. <i>Heart</i> . 2013; 99(15): 1089-92.                                                                                                                                                                                                                                                    | 2008-2011             | * |
| BMRB. Social Research, Infant Feeding Survey, 2005 [computer file]. Colchester, Essex: UK Data Archive [distributor], October 2007. SN: 5727 <a href="http://dx.doi.org/10.5255/UKDA-SN-5727-1">http://dx.doi.org/10.5255/UKDA-SN-5727-1</a>                                                                                                                                                                             | 2005                  |   |
| BMRB International and BMRB. Social Research, Infant Feeding Survey, 2000 [computer file]. Colchester, Essex: UK Data Archive [distributor] November 2003. SN: 4746. <a href="http://dx.doi.org/10.5255/UKDA-SN-4746-1">http://dx.doi.org/10.5255/UKDA-SN-4746-1</a>                                                                                                                                                     | 2000                  |   |
| Office of Population Censuses and Surveys. Social Survey Division, Infant Feeding Survey, 1995 [computer file]. Colchester, Essex: UK Data Archive [distributor], August 1998. SN: 3778. <a href="http://dx.doi.org/10.5255/UKDA-SN-3778-1">http://dx.doi.org/10.5255/UKDA-SN-3778-1</a>                                                                                                                                 | 1995                  |   |
| Mallen CD, Mottram S, Wynne-Jones G, Thomas E. Birth-related exposures and asthma and allergy in adulthood: a population-based cross-sectional study of young adults in North Staffordshire. <i>J Asthma</i> . 2008; 45(4): 309-12.                                                                                                                                                                                      | 2002                  | * |
| Simpson CR, Newton J, Hippisley-Cox J, Sheikh A. Trends in the epidemiology and prescribing of medication for eczema in England. <i>J R Soc Med</i> . 2009; 102(3): 108-17.                                                                                                                                                                                                                                              | 2001-2005             | * |
| Ziyab AH, Raza A, Karmaus W, Tongue N, Zhang H, Matthews S, Arshad SH, Roberts G. Trends in eczema in the first 18 years of life: results from the Isle of Wight 1989 birth cohort study. <i>Clin Exp Allergy</i> . 2010; 40(12): 1776-84.                                                                                                                                                                               | 1989-1990, 1993, 2007 | * |
| Davies GM, Jones CM, Monaghan N, Morgan MZ, Neville JS, Pitts NB. The caries experience of 11 to 12 year-old children in Scotland and Wales and 12 year-olds in England in 2008-2009: reports of co-ordinated surveys using BASCD methodology. <i>Community Dent Health</i> . 2012; 29(1): 8-13.                                                                                                                         | 2008-2009             | * |
| Davies GM, Jones CM, Monaghan N, Morgan MZ, Pine CM, Pitts NB, Neville JS, Rooney E. The caries experience of 5 year-old children in Scotland, Wales and England in 2007-2008 and the impact of consent arrangements. Reports of co-ordinated surveys using BASCD criteria. <i>Community Dent Health</i> . 2011; 28(1): 5-11.                                                                                            | 2007-2008             | * |
| Naftalin J, Hoo W, Pateman K, Mavrelis D, Holland T, Jurkovic D. How common is adenomyosis? A prospective study of prevalence using transvaginal ultrasound in a gynaecology clinic. <i>Hum Reprod</i> . 2012; 27(12): 3432-9.                                                                                                                                                                                           | 2009-2010             | * |
| Oakley L, Doyle P, Maconochie N. Lifetime prevalence of infertility and infertility treatment in the UK: results from a population-based survey reproduction. <i>Hum Reprod</i> . 2008; 23(2): 447-50.                                                                                                                                                                                                                   | 2001                  | * |
| Wilkes S, Chinn DJ, Murdoch A, Rubin G. Epidemiology and management of infertility: a population-based study in UK primary care. <i>Fam Pract</i> . 2006; 26(4): 269-74.                                                                                                                                                                                                                                                 | 2005-2006             | * |
| Day TG, Thein SL, Drasar E, Dick MC, Height SE, O'Driscoll S, Rees DC. Changing pattern of hospital admissions of children with sickle cell disease over the last 50 years. <i>J Pediatr Hematol Oncol</i> . 2011; 33(7): 491-5.                                                                                                                                                                                         | 2008-2009             |   |
| Huerta C, Rivero E, Rodriguez LAG. Incidence and risk factors for psoriasis in the general population. <i>Arch Dermatol</i> . 2007; 143(12): 1559-65.                                                                                                                                                                                                                                                                    | 1996-1997             | * |
| Emerson E. Deprivation, ethnicity and the prevalence of intellectual and developmental disabilities. <i>J Epidemiol Community Health</i> . 2012; 66(3): 212-4.                                                                                                                                                                                                                                                           | 2008                  | * |
| Zimmermann A, Bernuit D, Gerlinger C, Schaeffers M, Geppert K. Prevalence, symptoms and management of uterine fibroids: an international internet based survey of 21,746 women. <i>BMC Womens Health</i> . 2012; 12: 6.                                                                                                                                                                                                  | 2009                  | * |
| Macfarlane GJ, Beasley M, Jones EA, Prescott GJ, Docking R, Keeley P, McBeth J, Jones GT. The prevalence and management of low back pain across adulthood: Results from a population-based cross-sectional study (the MUSICIAN study). <i>Pain</i> . 2012; 153(1): 27-32.                                                                                                                                                | 2008                  | * |
| Docking RE, Fleming J, Brayne C, Zhao J, Macfarlane GJ, Jones GT, Cambridge City over-75s Cohort Study collaboration. Epidemiology of back pain in older adults: prevalence and risk factors for back pain onset. <i>Rheumatology</i> . 2011; 50(9): 1645-53.                                                                                                                                                            | 1988-1989, 1992-1993  | * |
| Giaquinto C, van Damme P, REVEAL Study Group. Age distribution of paediatric rotavirus gastroenteritis cases in Europe: the REVEAL study. <i>Scand J Infect Dis</i> . 2010; 42(2): 142-7.                                                                                                                                                                                                                                | 2004-2005             | * |
| Copeland JR, McCracken CF, Dewey ME, Wilson KC, Doran M, Gilmore C, Scott A, Larkin BA. Undifferentiated dementia, Alzheimer's disease and vascular dementia: age- and gender-related incidence in Liverpool. <i>The MRC-ALPHA Study</i> . <i>Br J Psychiatry</i> . 1999; 175(5): 433-8.                                                                                                                                 | 1989-1998             |   |
| Livingston G, Sax K, Willison J, Blizard B, Mann A. The Gospel Oak Study stage II: the diagnosis of dementia in the community. <i>Psychol Med</i> . 1995; 20(4): 881-91.                                                                                                                                                                                                                                                 | 1987-1989             |   |
| Davies AR, Grundy E, Nitsch D, Smeeth L. Constituent country inequalities in myocardial infarction incidence and case fatality in men and women in the United Kingdom, 1996-2005. <i>J Public Health (Oxf)</i> . 2011; 33(1): 131-8.                                                                                                                                                                                     | 1996, 2000, 2005      | * |
| Smolina K, Wright FL, Rayner M, Goldacre MJ. Incidence and 30-day case fatality for acute myocardial infarction in England in 2010: national-link database study. <i>Eur J Public Health</i> . 2012; 22(6): 848-53.                                                                                                                                                                                                      | 2010                  | * |
| Matthews FE, Arthur, Antony, Barnes, Linda E, Bond, John, Jagger, Carol, Robinson, Louise, Brayne, Carol. A two-decade comparison of prevalence of dementia in individuals aged 65 years and older from three geographical areas of England: results of the Cognitive Function and Ageing Study I and II. <i>Lancet</i> . 2013; 382(9902): 1405-1412.                                                                    | 1990-1993, 2008-2011  |   |
| Hart DJ, Spector TD. The relationship of obesity, fat distribution and osteoarthritis in women in the general population: the Chingford Study. <i>Rheumatol</i> . 1993; 20(2): 331-5.                                                                                                                                                                                                                                    | 1989-1993             |   |
| Cooper C, Snow S, McAlindon TE, Kellingray S, Stuart B, Coggon D, Dieppe PA. Risk factors for the incidence and progression of radiographic knee osteoarthritis. <i>Arthritis Rheum</i> . 2000; 43(5): 995-1000.                                                                                                                                                                                                         | 1991-1996             |   |
| Neame RL, Carr AJ, Muir K, Doherty M. UK community prevalence of knee chondrocalcinosis: evidence that correlation with osteoarthritis is through shared association with osteophyte. <i>Ann Rheum Dis</i> . 2003; 62(6): 513-8.                                                                                                                                                                                         | 2000                  |   |
| Symmons DP, Jones MA, Scott DL, Prior P. Longterm mortality outcome in patients with rheumatoid arthritis: early presenters continue to do well. <i>Rheumatol</i> . 1998; 25(6): 1072-7.                                                                                                                                                                                                                                 | 1982-1990             |   |
| Symmons DP, Prior P, Scott DL, Brown R, Hawkins CF. Factors influencing mortality in rheumatoid arthritis. <i>J Chronic Dis</i> . 1986; 39(2): 137-45.                                                                                                                                                                                                                                                                   | 1964-1981             |   |
| Chehata JC, Hassell AB, Clarke SA, Mathey DL, Jones MA, Jones PW, Dawes PT. Mortality in rheumatoid arthritis: relationship to single or composite measures of disease activity. <i>Rheumatology</i> . 2001; 40(4): 447-52.                                                                                                                                                                                              | 1981-1998             |   |
| Goodson N, Marks J, Lunt M, Symmons D. Cardiovascular admissions and mortality in an inception cohort of patients with rheumatoid arthritis with onset in the 1980s and 1990s. <i>Ann Rheum Dis</i> . 2005; 64(11): 1595-601.                                                                                                                                                                                            | 1981-2002             |   |
| Goodson NJ, Wiles NJ, Lunt M, Barrett EM, Silman AJ, Symmons DPM. Mortality in early inflammatory polyarthritis: cardiovascular mortality increased in seropositive patients. <i>Arthritis Rheum</i> . 2002; 46(8): 2010-9.                                                                                                                                                                                              | 1990-1999             |   |
| Young A, Koduri G, Batley M, Kulinskaya E, Gough A, Norton S, Dixey J. Mortality in rheumatoid arthritis. Increased in the early course of disease, ischaemic heart disease and in pulmonary fibrosis. <i>Rheumatology</i> . 2007; 46(2): 350-7.                                                                                                                                                                         | 1986-2004             |   |
| Symmons D, Turner G, Webb R, Asten P, Barrett E, Lunt M, Scott D, Silman A. The prevalence of rheumatoid arthritis in the United Kingdom: new estimates for a new century. <i>Rheumatology</i> . 2002; 41(7): 793-800.                                                                                                                                                                                                   | 1999                  |   |

|                                                                                                                                                                                                                                                                                                                                                                      |                      |  |
|----------------------------------------------------------------------------------------------------------------------------------------------------------------------------------------------------------------------------------------------------------------------------------------------------------------------------------------------------------------------|----------------------|--|
| Rodríguez LAG, Tolosa LB, Ruigómez A, Johansson S, Wallander M-A. Rheumatoid arthritis in UK primary care: incidence and prior morbidity. <i>Scand J Rheumatol</i> . 2009; 38(3): 173-7.                                                                                                                                                                             | 1996-1997            |  |
| Symmons DP, Barrett EM, Bankhead CR, Scott DG, Silman AJ. The incidence of rheumatoid arthritis in the United Kingdom: results from the Norfolk Arthritis Register. <i>Br J Rheumatol</i> . 1994; 33(8): 735-9.                                                                                                                                                      | 1990-1991            |  |
| Wiles N, Symmons DP, Harrison B, Barrett E, Barrett JH, Scott DG, Silman AJ. Estimating the incidence of rheumatoid arthritis: trying to hit a moving target? <i>Arthritis Rheum</i> . 1999; 42(7): 1339-46.                                                                                                                                                         | 1996                 |  |
| Davis A, Smith P, Ferguson M, Stephens D, Gianopoulos I. Acceptability, benefit and costs of early screening for hearing disability: a study of potential screening tests and models. <i>Health Technol Assess</i> . 2007; 11(42): 1-294.                                                                                                                            | 1996                 |  |
| Smith P, Davis A, Ferguson M, Lutman M. Hearing in Young Adults: Report to ISO/TC43/WG1. <i>Noise Health</i> . 1999; 1(4): 1-10.                                                                                                                                                                                                                                     | 1994                 |  |
| Davis AC. The prevalence of hearing impairment and reported hearing disability among adults in Great Britain. <i>Int J Epidemiol</i> . 1989; 18(4): 911-7.                                                                                                                                                                                                           | 1983                 |  |
| Office for National Statistics (United Kingdom). United Kingdom Adult Dental Health Survey 2009-2010 - ON.                                                                                                                                                                                                                                                           | 2009-2010            |  |
| Office for National Statistics (United Kingdom). United Kingdom Children's Dental Health Survey 2003 - ON.                                                                                                                                                                                                                                                           | 2003                 |  |
| European Commission (2012): Eurobarometer 72.3 (Oct 2009). TNS OPINION & SOCIAL, Brussels [Producer]. GESIS Data Archive, Cologne. ZA4977 Data file Version 2.0.0, doi:10.4232/1.11140                                                                                                                                                                               | 2009                 |  |
| European Commission (2012): Eurobarometer 66.2 (Oct-Nov 2006). TNS OPINION & SOCIAL, Brussels [Producer]. GESIS Data Archive, Cologne. ZA4527 Data file Version 1.0.1, doi:10.4232/1.10981                                                                                                                                                                           | 2006                 |  |
| European Commission (2012): Eurobarometer 64.3 (Nov-Dec 2005). TNS OPINION & SOCIAL, Brussels [Producer]. GESIS Data Archive, Cologne. ZA4415 Data file Version 1.0.1, doi:10.4232/1.10971                                                                                                                                                                           | 2005                 |  |
| European Commission (2012): Eurobarometer 58.2 (Oct-Dec 2002). European Opinion Research Group (EORG), Brussels. GESIS Data Archive, Cologne. ZA3886 Data file Version 1.0.1, doi:10.4232/1.10954                                                                                                                                                                    | 2002                 |  |
| Crocombe LA, Mejia GC, Koster CR, Slade GD. Comparison of adult oral health in Australia, the USA, Germany and the UK. <i>Aust Dent J</i> . 200 54(2): 147-53.                                                                                                                                                                                                       | 1998                 |  |
| Bolin AK, Bolin A, Koch G. Children's dental health in Europe: caries experience of 5- and 12-year-old children from eight EU countries. <i>Int J Paediatr Dent</i> . 1996; 6(3): 155-62.                                                                                                                                                                            | 1993                 |  |
| Anderson RJ, Bradnock G, James PM. The dental health of Guernsey school children 1984. <i>Br Dent J</i> . 1986; 160(9): 323-4                                                                                                                                                                                                                                        | 1984                 |  |
| Silver DH. Improvements in the dental health of 3-year-old Hertfordshire children after 8 years. <i>Br Dent J</i> . 1982; 153(5): 179-83.                                                                                                                                                                                                                            | 1973, 1981           |  |
| Jenkins P. West Midlands caries prevalence studies, 15 year old schoolchildren 1986. <i>Community Dent Health</i> . 1989; 6(1): 67-8.                                                                                                                                                                                                                                | 1986                 |  |
| Andlaw RJ, Burchell CK, Tucker GJ. Comparison of dental health of 11-year-old children in 1970 and 1979, and of 14-year-old children in 1973 and 1979: studies in Bristol, England. <i>Caries Res</i> . 1982; 16(3): 257-64.                                                                                                                                         | 1970-1973            |  |
| Zoiopoulos L, Athanassouli T, Gelbier S, Apostolopoulos A. Caries prevalence of 5-year-old children in Athens and in South London. <i>Int J Paediatr Dent</i> . 1996; 6(1): 3-6.                                                                                                                                                                                     | 1993                 |  |
| Holt RD, Winter GB, Downer MC, Bellis WJ, Hay IS. Caries in pre-school children in Camden 1993/94. <i>Br Dent J</i> . 1996; 181(11-12): 405-10.                                                                                                                                                                                                                      | 1986, 1993-1994      |  |
| Silver DH. A comparison of 3-year-olds' caries experience in 1973, 1981 and 1989 in a Hertfordshire town, related to family behaviour and social class. <i>Br Dent J</i> . 1992; 172(5): 191-7.                                                                                                                                                                      | 1973, 1981, 1989     |  |
| Jones SG, Nunn JH. The dental health of 3-year-old children in east Cumbria 1993. <i>Community Dent Health</i> . 1995; 12(3): 161-6.                                                                                                                                                                                                                                 | 1993                 |  |
| Davies GM, Worthington HV, Ellwood RP, Bentley EM, Blinkhorn AS, Taylor GO, Davies RM. A randomised controlled trial of the effectiveness of providing free fluoride toothpaste from the age of 12 months on reducing caries in 5-6 year old children. <i>Community Dent Health</i> . 2002; 19(3): 131-6.                                                            | 1993                 |  |
| Marchmont MD, Gray MM. A caries prevalence study of 5-year-old children in South-East Staffordshire in 1985 which resulted in the unexpected finding of a naturally fluoridated water supply to the town of Uttoxeter. <i>Community Dent Health</i> . 1987; 4(2): 117-9.                                                                                             | 1984-1986            |  |
| Davies GM, Blinkhorn FA, Duxbury JT. Caries among 3-year-olds in greater Manchester. <i>Br Dent J</i> . 2001; 190(7): 381-4                                                                                                                                                                                                                                          | 1999                 |  |
| Commission of the European Communities (2012): Eurobarometer 38.0 (Sep-Oct 1992). INRA, Brussels. GESIS Data Archive, Cologne. ZA229: Data file Version 1.1.0, doi:10.4232/1.10903                                                                                                                                                                                   | 1992                 |  |
| Commission of the European Communities (2012): Eurobarometer 36 (Oct-Nov 1991). INRA, Brussels. GESIS Data Archive, Cologne. ZA2081 Data file Version 1.1.0, doi:10.4232/1.10848                                                                                                                                                                                     | 1991                 |  |
| Commission of the European Communities (2012): Eurobarometer 32 (Oct-Nov 1989). INRA, Brussels. GESIS Data Archive, Cologne. ZA1752 Data file Version 1.1.0, doi:10.4232/1.10890                                                                                                                                                                                     | 1989                 |  |
| European Commission (2012): Eurobarometer 43.0 (Mar-Apr 1995). INRA, Brussels. GESIS Data Archive, Cologne. ZA2636 Data file Version 1.0.1, doi:10.4232/1.10912                                                                                                                                                                                                      | 1995                 |  |
| European Commission (2012): Eurobarometer 41.0 (Mar-May 1994). INRA, Brussels. GESIS Data Archive, Cologne. ZA2490 Data file Version 1.1.0, doi:10.4232/1.10909                                                                                                                                                                                                      | 1994                 |  |
| Commission of the European Communities (2012): Eurobarometer 27 (Mar-May 1987). Faits et Opinions, Paris. GESIS Data Archive, Cologne. ZA1712 Data file Version 1.0.1, doi:10.4232/1.10884                                                                                                                                                                           | 1987                 |  |
| Crisp AH, Callender JS, Halek C, Hsu LK. Long-term mortality in anorexia nervosa. A 20-year follow-up of the St George's and Aberdeen cohorts. <i>Br Psychiatry</i> . 1992; 161(1): 104-7.                                                                                                                                                                           | 1968-1990            |  |
| Ford T, Goodman R, Meltzer H. The British Child and Adolescent Mental Health Survey 1999: the prevalence of DSM-IV disorders. <i>J Am Acad Child Adolesc Psychiatry</i> . 2003; 42(10): 1203-11.                                                                                                                                                                     | 1999                 |  |
| Messer J, Goodman, Robert, Rowe, Richard, Meltzer, Howard, Maughan, Barbara. Preadolescent Conduct Problems in Girls and Boys. <i>J Am Acad Child Adolesc Psychiatry</i> . 2006; 45(2): 184-91.                                                                                                                                                                      | 1997                 |  |
| Kim-Cohen J, Arseneault L, Caspi A, Tomás MP, Taylor A, Moffitt TE. Validity of DSM-IV conduct disorder in 41/2-5-year-old children: longitudinal epidemiological study. <i>Am J Psychiatry</i> . 2005; 162(6): 1108-17.                                                                                                                                             | 1997                 |  |
| Elliott PM, Gimeno JR, Thaman R, Shah J, Ward D, Dickie S, Tome Esteban MT, McKenna WJ. Historical trends in reported survival rates in patients with hypertrophic cardiomyopathy. <i>Heart</i> . 2006; 92(6): 785-91.                                                                                                                                               | 1988-2002            |  |
| Office for National Statistics (United Kingdom). United Kingdom - England and Wales Mortality Data 1981-1994. Newport, United Kingdom: Office for National Statistics (United Kingdom). [Unpublished].                                                                                                                                                               | 1981-1994            |  |
| Office for National Statistics (United Kingdom). United Kingdom - England and Wales Mortality Data 1995-2000. Newport, United Kingdom: Office for National Statistics (United Kingdom). [Unpublished].                                                                                                                                                               | 1995-2000            |  |
| Office for National Statistics (United Kingdom). United Kingdom - England and Wales Mortality Data 2001-2012. Newport, United Kingdom: Office for National Statistics (United Kingdom). [Unpublished].                                                                                                                                                               | 2001-2012            |  |
| Robertson WG, Peacock M, Baker M, Marshall DH, Pearlman B, Speed R, Sergeant V, Smith A. Studies on the prevalence and epidemiology of uric acid stone disease in men in Leeds. <i>Br J Urol</i> . 1983; 55(6): 595-8.                                                                                                                                               | 1981-1983            |  |
| Ayuso-Mateos JL, Vázquez-Barquero JL, Dowrick C, Lehtinen V, Dalgard OS, Casey P, Wilkinson C, Lasa L, Page H, Dunn G, Wilkinson C. Depressive disorders in Europe: prevalence figures from the ODIN study. <i>Br J Psychiatry</i> . 2001; 179(4): 308-16.                                                                                                           | 1999-2001            |  |
| Skehan JD, Murray M, Mills PG. Infective endocarditis: incidence and mortality in the North East Thames Region. <i>Br Heart J</i> . 1988; 59(1): 62-8.                                                                                                                                                                                                               | 1982-1984            |  |
| Waterstone M, Bewley S, Wolfe C. Incidence and predictors of severe obstetric morbidity: case-control study. <i>BMJ</i> . 2001; 322(7294): 1089-94.                                                                                                                                                                                                                  | 1997-1998            |  |
| de Marco R, Accordini S, Cerveri I, Corsico A, Sunyer J, Neukirch F, Künzli N, Leynaert B, Janson C, Gislason T, Vermeire P, Svanes C, Anto JM, Burney P. European Community Respiratory Health Survey Study Group. An international survey of chronic obstructive pulmonary disease in young adults according to GOLD stages. <i>Thorax</i> . 2004; 59(2): 120-125. | 1991-1993            |  |
| Buist AS, McBurnie MA, Vollmer WM, Gillespie S, Burney P, Mannino DM, Menezes AM, Sullivan SD, Lee TA, Weiss KB, Jensen RL, Marks GB, Gulsvik A, Nizankowska-Mogilnicka E. BOLD Collaborative Research Group. International variation in the prevalence of COPD (the BOLD Study): a population-based prevalence study. <i>Lancet</i> . 2007; 9589(9589): 741-50.     | 1991-2000, 2005-2006 |  |
| Higham J, Kang J-Y, Majeed A. Recent trends in admissions and mortality due to peptic ulcer in England: increasing frequency of haemorrhage among older subjects. <i>Gut</i> . 2002; 50(4): 460-4.                                                                                                                                                                   | 1989-1998            |  |
| Chakrabarti S, Fombonne E. Pervasive developmental disorders in preschool children. <i>JAMA</i> . 2001; 285(24): 3093-9.                                                                                                                                                                                                                                             | 1998-2003            |  |
| Chakrabarti S, Fombonne E. Pervasive Developmental Disorders in Preschool Children: Confirmation of High Prevalence. <i>Am J Psychiatry</i> . 200; 162(6): 1133-41.                                                                                                                                                                                                  | 2000-2003            |  |
| Powell J, Edwards A, Edwards M, Pandit B, Sungum-Paliwal S, Whitehouse W. Changes in the incidence of childhood autism and other autistic spectrum disorders in preschool children from two areas of the West Midlands, UK. <i>Dev Med Child Neurol</i> . 2000; 42(9): 624-8.                                                                                        | 1991-1996            |  |
| Baird G, Simonoff E, Pickles A, Chandler S, Loucas T, Meldrum D, Charman T. Prevalence of disorders of the autism spectrum in a population cohort of children in South Thames: the Special Needs and Autism Project (SNAP). <i>Lancet</i> . 2006; 368(9531): 210-5.                                                                                                  | 2003                 |  |
| Selo-Ojeme D, Lawal O, Shah J, Mandal R, Pathak S, Selo-Ojeme U, Samuel D. The incidence of uterine leiomyoma and other pelvic ultrasonographic findings in 2,034 consecutive women in a north London hospital. <i>J Obstet Gynaecol</i> . 2008; 28(4): 421-3.                                                                                                       | 2005                 |  |

|                                                                                                                                                                                                                                                                                                                                                                                                     |                            |   |
|-----------------------------------------------------------------------------------------------------------------------------------------------------------------------------------------------------------------------------------------------------------------------------------------------------------------------------------------------------------------------------------------------------|----------------------------|---|
| Downes E, Sikirica V, Gilabert-Estelles J, Bolge SC, Dodd SL, Maroulis C, Subramanian D. The burden of uterine fibroids in five European countries. <i>Eur J Obstet Gynecol Reprod Biol.</i> 2010; 152(1): 96-102.                                                                                                                                                                                  | 2007                       |   |
| Stones W, Lim W, Al-Azzawi F, Kelly M. An investigation of maternal morbidity with identification of life-threatening 'near miss' episodes. <i>Hea Trends.</i> 1991; 23(1): 13-5.                                                                                                                                                                                                                   | 1986                       |   |
| Sehrie NJ, Jolly M, Harris JP, Wadsworth J, Joffe M, Beard RW, Regan L, Robinson S. Maternal obesity and pregnancy outcome: a study of 2872 pregnancies in London. <i>Int J Obes Relat Metab Disord.</i> 2001; 25(8): 1175-1182.                                                                                                                                                                    | 1989-1997                  |   |
| Goodman R FT, Richards H, Gatward R, Meltzer H. The Development and Well-Being Assessment: description and initial validation of an integrated assessment of child and adolescent psychopathology. <i>J Child Psychol Psychiatry.</i> 2000; 41(5): 645-55.                                                                                                                                          | 1998                       |   |
| McArdle P, Prosser J, Kolvin I. Prevalence of psychiatric disorder: with and without psychosocial impairment. <i>Eur Child Adolesc Psychiatry.</i> 20013(6): 347-53.                                                                                                                                                                                                                                | 2002                       |   |
| United States Renal Data System Coordinating Center. USRDS 2010 Annual Data Report: Atlas of Chronic Kidney Disease and End-Stage Renal Disease in the United States. Bethesda, United States: National Institute of Diabetes and Digestive and Kidney Diseases (NIDDK), National Institutes of Health, 2010.                                                                                       | 2004-2008                  |   |
| Human Nutrition Research, Medical Research Council, National Centre for Social Research (NatCen), Northern Ireland Statistics and Research Agency (NISRA), University College London Medical School. United Kingdom National Diet and Nutrition Survey 2008-2011 - Public Health England.                                                                                                           | 2008-2011                  | * |
| United States Renal Data System Coordinating Center. USRDS 2009 Annual Data Report: Atlas of Chronic Kidney Disease and End-Stage Renal Disease in the United States. Bethesda, United States: National Institute of Diabetes and Digestive and Kidney Diseases (NIDDK), National Institutes of Health, 2009.                                                                                       | 2000-2003                  |   |
| United States Renal Data System Coordinating Center. USRDS 2003 Annual Data Report: Atlas of End-Stage Renal Disease in the United States. Bethesda, United States: National Institute of Diabetes and Digestive and Kidney Diseases (NIDDK), National Institutes of Health, 2003.                                                                                                                  | 1998-1999                  |   |
| LaMontagne DS, Fenton KA, Randall S, Anderson S, Carter P. Establishing the National Chlamydia Screening Programme in England: results from the first full year of screening. <i>Sex Transm Infect.</i> 2004; 80(5): 335-41.                                                                                                                                                                        | 2004                       |   |
| NHS England. United Kingdom - England Hospital Episode Statistics 2002-2003                                                                                                                                                                                                                                                                                                                         | 2002                       |   |
| NHS England. United Kingdom - England Hospital Episode Statistics 2003-2004                                                                                                                                                                                                                                                                                                                         | 2003                       |   |
| NHS England. United Kingdom - England Hospital Episode Statistics 2004-2005                                                                                                                                                                                                                                                                                                                         | 2004-2005                  |   |
| NHS England. United Kingdom - England Hospital Episode Statistics 2005-2006                                                                                                                                                                                                                                                                                                                         | 2005                       |   |
| NHS England. United Kingdom - England Hospital Episode Statistics 2006-2007                                                                                                                                                                                                                                                                                                                         | 2006                       |   |
| NHS England. United Kingdom - England Hospital Episode Statistics 2007-2008                                                                                                                                                                                                                                                                                                                         | 1981-1990, 2005, 2007-2008 |   |
| NHS England. United Kingdom - England Hospital Episode Statistics 2008-2009                                                                                                                                                                                                                                                                                                                         | 2008                       |   |
| NHS England. United Kingdom - England Hospital Episode Statistics 2009-2010                                                                                                                                                                                                                                                                                                                         | 2009                       |   |
| NHS England. United Kingdom - England Hospital Episode Statistics 2010-2011                                                                                                                                                                                                                                                                                                                         | 2010                       |   |
| NHS England. United Kingdom - England Hospital Episode Statistics 2011-2012                                                                                                                                                                                                                                                                                                                         | 2011-2012                  |   |
| General Register Office for Scotland, Northern Ireland Statistics and Research Agency (NISRA), Office for National Statistics (United Kingdom) United Kingdom All-Cause Mortality Data 1950-2012. [Unpublished].                                                                                                                                                                                    | 1950-2012                  |   |
| United Kingdom Cancer Information Service (UKCIS). United Kingdom - England Cancer Incidence Data 1990-2010. [Unpublished].                                                                                                                                                                                                                                                                         | 1990-2010                  |   |
| Office of Population Censuses and Surveys. Social Survey Division. OPCS Surveys of Psychiatric Morbidity: Private Household Survey, 1993 [computer file]. Colchester, Essex: UK Data Archive [distributor], September 1996. SN: 3560, <a href="http://dx.doi.org/10.5255/UKDA-SN-3560-1">http://dx.doi.org/10.5255/UKDA-SN-3560-1</a>                                                               | 1993                       | * |
| Office for National Statistics. Psychiatric Morbidity among Adults Living in Private Households, 2000 [computer file]. Colchester, Essex: UK Data Archive [distributor], May 2003. SN: 4653, <a href="http://dx.doi.org/10.5255/UKDA-SN-4653-1">http://dx.doi.org/10.5255/UKDA-SN-4653-1</a>                                                                                                        | 2000                       |   |
| Foltnie T, Brayne CEG, Robbins TW, Barker RA. The cognitive ability of an incident cohort of Parkinson's patients in the UK. <i>The CamPaGN stud Brain.</i> 2004; 127(3): 550-60.                                                                                                                                                                                                                   | 2000-2003                  |   |
| Hobson P, Gallacher J, Meara J. Cross-sectional survey of Parkinson's disease and parkinsonism in a rural area of the United Kingdom. <i>Mov Disor</i> 2005; 20(8): 995-8.                                                                                                                                                                                                                          | 1998                       |   |
| Cockerell O, Goodridge DM, Brodie D, Sander JWA, Shorvon S. Neurological Disease in a Defined Population: The Results of a Pilot Study in Two General Practices. <i>Neuroepidemiology.</i> 1996; 15(2): 73-82.                                                                                                                                                                                      | 1993                       |   |
| Prettyman R. Extrapyramidal signs in cognitively intact elderly people. <i>Age Ageing.</i> 1998; 27(5): 557-61                                                                                                                                                                                                                                                                                      | 1995                       |   |
| Schrag A, Ben-Shlomo Y, Quinn NP. Cross sectional prevalence survey of idiopathic Parkinson's disease and parkinsonism in London. <i>BMJ.</i> 2000 321(7252): 21-2.                                                                                                                                                                                                                                 | 1997                       |   |
| Sutcliffe RL, Prior R, Mawby B, McQuillan WJ. Parkinson's disease in the district of the Northampton Health Authority, United Kingdom. A study of prevalence and disability. <i>Acta Neurol Scand.</i> 1985; 72(4): 363-79.                                                                                                                                                                         | 1982                       |   |
| Sutcliffe RL, Meara JR. Parkinson's disease epidemiology in the Northampton District, England, 1992. <i>Acta Neurol Scand.</i> 1995; 92(6): 443-50.                                                                                                                                                                                                                                                 | 1989                       |   |
| Wade DT, Hewer RL. Epidemiology of some neurological diseases with special reference to work load on the NHS. <i>Disabil Rehabil.</i> 1986; 8(3): 12-37.                                                                                                                                                                                                                                            | 1984                       |   |
| Goldacre M, Shiwach R, Yeates D. Estimating incidence and prevalence of treated psychiatric disorders from routine statistics: the example of schizophrenia in Oxfordshire. <i>J Epidemiol Community Health.</i> 1994; 48(3): 318-22.                                                                                                                                                               | 1986                       |   |
| McCreadie RG, Leese M, Tilak-Singh D, Loftus L, MacEwan T, Thornicroft G, Nithsdale, Nunhead and Norwood: similarities and differences in prevalence of schizophrenia and utilisation of services in rural and urban areas. <i>Br J Psychiatry.</i> 1997; 31-6.                                                                                                                                     | 1992-1993                  |   |
| Barnham JS, Freeman HL, Goldberg DP. Epidemiology of schizophrenia in Salford, 1974-84. Changes in an urban community over ten years. <i>Br Psychiatry.</i> 1991; 802-10.                                                                                                                                                                                                                           | 1983-1984                  |   |
| Jeffreys SE, Harvey CA, McNaught AS, Quayle AS, King MB, Bird AS. The Hampstead Schizophrenia Survey 1991. I. Prevalence and service use comparisons in an inner London health authority, 1986-1991. <i>Br J Psychiatry.</i> 1997; 301-6.                                                                                                                                                           | 1991                       |   |
| Harvey CA, Pantelis C, Taylor J, McCabe PJ, Lefevre K, Campbell PG, Hirsch SR. The Camden schizophrenia surveys. II. High prevalence of schizophrenia in an inner London borough and its relationship to socio-demographic factors. <i>Br J Psychiatry.</i> 1996; 168(4): 418-26.                                                                                                                   | 1981, 1985-1986            |   |
| King M, Coker E, Leavey G, Hoare A, Johnson-Sabine E. Incidence of psychotic illness in London: comparison of ethnic groups. <i>BMJ.</i> 199 309(6962): 1115-9.                                                                                                                                                                                                                                     | 1991-1992                  |   |
| McNaught AS, Jeffreys SE, Harvey CA, Quayle AS, King MB, Bird AS. The Hampstead Schizophrenia Survey 1991. II: Incidence and migration in inner London. <i>Br J Psychiatry.</i> 1997; 307-11.                                                                                                                                                                                                       | 1986-1991                  |   |
| Harrison G, Hopper K, Craig T, Laska E, Siegel C, Wanderling J, Dube KC, Ganey K, Giel R, van der Heiden W, Holmberg SK, Janca A, Lee PW, Leon CA, Malhotra S, Marsella AJ, Nakane Y, Sartorius N, Shen Y, Skoda C, Thara R, Tsirkin SJ, Varma VK, Walsh D, Wiersma D. Recovery from psychotic illness: a 15- and 25-year international follow-up study. <i>Br J Psychiatry.</i> 2001; 178: 506-17. | 1978-1993                  |   |
| European School Survey Project on Alcohol and Other Drugs (ESPAD), Pompidou Group, Council of Europe, Swedish Council for Information on Alcohol and Other Drugs (CAN). ESPAD Report 2003: Alcohol and Other Drug Use Among Students in 35 European Countries. Stockholm, Sweden: Swedish Council for Information on Alcohol and Other Drugs (CAN), 2004.                                           | 2003                       |   |
| Singleton N, Bumpstead R, O'Brien M, Lee A, Meltzer H. Psychiatric morbidity among adults living in private households, 2000. <i>Int Rev Psychiatr</i> 2003; 15(1-2): 65-73.                                                                                                                                                                                                                        | 2000                       |   |
| Department of Health (United Kingdom), Office for National Statistics (United Kingdom). The Prevalence of Back Pain in Great Britain in 1999. United Kingdom: Department of Health (United Kingdom), 1999.                                                                                                                                                                                          | 1998                       |   |
| Murphy S, Buckle P, Stubbs D. A cross-sectional study of self-reported back and neck pain among English schoolchildren and associated physical and psychological risk factors. <i>Arch Dis Child.</i> 2007; 38(6): 797-804.                                                                                                                                                                         | 2001                       |   |
| Palmer KT, Walsh K, Bendall H, Cooper C, Coggon D. Back pain in Britain: comparison of two prevalence surveys at an interval of 10 years. <i>BMJ.</i> 2000; 320(7249): 1577-8.                                                                                                                                                                                                                      | 1997-1998                  |   |
| Croft PR, Rigby AS. Socioeconomic influences on back problems in the community in Britain. <i>J Epidemiol Community Health.</i> 1994; 48(2): 166-70.                                                                                                                                                                                                                                                | 1984-1985, 1989, 1993      |   |
| Watson KD, Papageorgiou AC, Jones GT, Taylor S, Symmonds DPM, Silman AJ, Macfarlane GJ. Low back pain in schoolchildren: occurrence and characteristics. <i>Pain.</i> 2002; 97(1-2): 87-92.                                                                                                                                                                                                         | 1994-1997, 1999-2000       |   |
| Harkness EF, Macfarlane GJ, Silman AJ, McBeth J. Is musculoskeletal pain more common now than 40 years ago?: Two population-based cross-sectional studies. <i>Rheumatology.</i> 2005; 44(7): 890-5.                                                                                                                                                                                                 | 1994-1995                  |   |
| Papageorgiou AC, Croft PR, Ferry S, Jayson MI, Silman AJ. Estimating the prevalence of low back pain in the general population. Evidence from the South Manchester Back Pain Survey. <i>Spine.</i> 1995; 20(17): 1889-94.                                                                                                                                                                           | 1992                       |   |
| Wormald RP, Wright LA, Courtney P, Beaumont B, Haines AP. Visual problems in the elderly population and implications for services. <i>BMJ.</i> 199 304(6836): 1226-9.                                                                                                                                                                                                                               | 1989-1990                  |   |
| Van der Pols JC, Bates CJ, McGraw PV, Thompson JR, Reacher M, Prentice A, Finch S. Visual acuity measurements in a national sample of British elderly people. <i>Br J Ophthalmol.</i> 2000; 84(2): 165-70.                                                                                                                                                                                          | 1994-1995                  |   |
| Stewart-Brown S, Butler N. Visual acuity in a national sample of 10 year old children. <i>J Epidemiol Community Health.</i> 1985; 39(2): 107-12.                                                                                                                                                                                                                                                    | 1980                       |   |
| Gibson JM, Lavery JR, Rosenthal AR. Blindness and partial sight in an elderly population. <i>Br J Ophthalmol.</i> 1986; 70(9): 700-                                                                                                                                                                                                                                                                 | 1982-1984                  |   |



|                                                                                                                                                                                                                                                                                                                                                                    |                                  |   |
|--------------------------------------------------------------------------------------------------------------------------------------------------------------------------------------------------------------------------------------------------------------------------------------------------------------------------------------------------------------------|----------------------------------|---|
| Kangro HO, Osman HK, Lau YL, Heath RB, Yeung CY, Ng MH. Seroprevalence of antibodies to human herpesviruses in England and Hong Kong Med Virol. 1994; 43(1): 91-6.                                                                                                                                                                                                 | 1991                             |   |
| Vyse AJ, Gay NJ, Hesketh LM, Morgan-Capner P, Miller E. Seroprevalence of antibody to varicella zoster virus in England and Wales in children and young adults. Epidemiol Infect. 2004; 132(6): 1129-34.                                                                                                                                                           | 1996                             |   |
| Kudesia G, Partridge S, Farrington CP, Soltanpoor N. Changes in age related seroprevalence of antibody to varicella zoster virus: impact on vaccini strategy. J Clin Pathol. 2002; 55(2): 154-5.                                                                                                                                                                   | 1966-1992                        |   |
| Chandramouli K, Steer CD, Ellis M, Emond AM. Effects of early childhood lead exposure on academic performance and behaviour of school children. Arch Dis Child. 2009; 94(11): 844-8.                                                                                                                                                                               | 1991-1992                        |   |
| Taylor CM, Golding J, Hibbeln J, Emond AM. Environmental Factors Predicting Blood Lead Levels in Pregnant Women in the UK: The ALSPA Study. PLoS One. 2013; 8(9): e72371.                                                                                                                                                                                          | 1991-1992                        |   |
| European Monitoring Centre for Drugs and Drug Addiction (EMCDDA). European Monitoring Centre for Drugs and Drug Addiction Statistics: Bulletin 2008. Lisbon, Portugal: European Monitoring Centre for Drugs and Drug Addiction (EMCDDA).                                                                                                                           | 1994-1996, 1998-2007             |   |
| Home Office (United Kingdom). Drug Misuse Declared: Findings from the 2006/07 British Crime Survey England and Wales. London, United Kingdom: Home Office (United Kingdom), 2007.                                                                                                                                                                                  | 1996, 1998, 2000-2003, 2006-2007 |   |
| Das VK. Aetiology of bilateral sensorineural hearing impairment in children: a 10 year study. Arch Dis Child. 1996; 74(1): 8-1                                                                                                                                                                                                                                     | 1981-1994                        |   |
| European Monitoring Centre for Drugs and Drug Addiction (EMCDDA). European Monitoring Centre for Drugs and Drug Addiction Statistics: Bulletin 2013. Lisbon, Portugal: European Monitoring Centre for Drugs and Drug Addiction (EMCDDA).                                                                                                                           | 2003-2007, 2011-2012             |   |
| Home Office (United Kingdom). Drug Misuse Declared: Results of the 1994 British Crime Survey. London, United Kingdom: Home Office (United Kingdom), 1996.                                                                                                                                                                                                          | 1994                             |   |
| WHO Regional Office for Europe (EURO-WHO). Young People's Health in Context. Health Behaviour in School-aged Children (HBSC) Study: International Report from the 2001-2002 Survey. Copenhagen, Denmark: WHO Regional Office for Europe (EURO-WHO), 2004.                                                                                                          | 2001-2002                        |   |
| WHO Regional Office for Europe (EURO-WHO). Inequalities in Young People's Health: HBSC International Report from the 2005/2006 Survey. Copenhagen, Denmark: WHO Regional Office for Europe (EURO-WHO), 2008.                                                                                                                                                       | 2005-2006                        |   |
| ESPAD Report 1995: Alcohol and Other Drug Use Among Students in 26 European Countries as it appears in P.N. Lee Statistics and Computing International Mortality and Smoking Statistics.                                                                                                                                                                           | 1995                             |   |
| ESPAD Report 1999: Alcohol and Other Drug Use Among Students in 30 European Countries as it appears in P.N. Lee Statistics and Computing International Mortality and Smoking Statistics.                                                                                                                                                                           | 1999                             |   |
| United Kingdom National Diet and Nutrition Survey: Adults Aged 19 to 64 Years 2000-2001 as it appears in Global Dietary Database Consortium, Nutrition and Chronic Disease Expert Group (NutriCoDE). Global Dietary Database 1980-2011. [Unpublished].                                                                                                             | 2000-2001                        |   |
| Office for National Statistics. Social and Vital Statistics Division and Food Standards Agency. National Diet and Nutrition Survey: Adults Aged 19 to 64 Years, 2000-2001 [computer file]. Colchester, Essex: UK Data Archive [distributor], May 2005. SN: 5140, <a href="http://dx.doi.org/10.5255/UKDA-SN-5140-1">http://dx.doi.org/10.5255/UKDA-SN-5140-1</a> . | 2000-2001                        |   |
| United Kingdom Dietary and Nutritional Survey of British Adults 1986-1987 as it appears in Global Dietary Database Consortium, Nutrition and Chronic Disease Expert Group (NutriCoDE). Global Dietary Database 1980-2011. [Unpublished].                                                                                                                           | 1986-1987                        |   |
| Office of Population Censuses and Surveys. Social Survey Division. Dietary and Nutritional Survey of British Adults, 1986-1987 [computer file]. Colchester, Essex: UK Data Archive [distributor], September 1991. SN: 2836, <a href="http://dx.doi.org/10.5255/UKDA-SN-2836-1">http://dx.doi.org/10.5255/UKDA-SN-2836-1</a> .                                      | 1986-1987                        |   |
| Eltze CM, Chong WK, Cox T, Whitney A, Cortina-Borja M, Chin RFM, Scott RC, Cross JH. A population-based study of newly diagnosed epilepsy in infants. Epilepsia. 2013; 54(3): 437-45.                                                                                                                                                                              | 2005-2006                        | * |
| National Centre for Social Research (NatCen), National Foundation for Educational Research (NFER) (UK). United Kingdom - Smoking, Drinking and Drug Use Among Young People in England in 2006: Headline Figures. Leeds, England: Information Centre for Health and Social Care, NHS, 2007.                                                                         | 2001-2006                        |   |
| Hawkins NM, Scholes S, Bajekal M, Love H, O'Flaherty M, Raine R, Capewell S. Community care in England: reducing socioeconomic inequalities heart failure. Circulation. 2012; 126(9): 1050-7.                                                                                                                                                                      | 1999, 2007                       |   |
| The INTERSALT Co-operative Research Group. Appendix tables. Centre-specific results by age and sex. J Hum Hypertens 1989;3(5):331-407, as it appears in Global Dietary Database Consortium, Nutrition and Chronic Disease Expert Group (NutriCoDE). Global Dietary Database 1980-2011. [Unpublished].                                                              | 1985-1987                        |   |
| Tomkinson J, Turnbull A, Robson G, Dawson J, Cloake E, Adelstein AM, Ashley J. Report on confidential enquiries into maternal deaths in England and Wales 1976-1978. Rep Health Soc Subj (Lond). 1982; 26: 1-180.                                                                                                                                                  | 1976-1978                        | * |
| Turnbull AC, Tindall VR, Robson G, Dawson IM, Cloake EP, Ashley JS. Report on confidential enquiries into maternal deaths in England and Wales 1979-1981. Rep Health Soc Subj (Lond). 1986; 29: 1-147.                                                                                                                                                             | 1979-1981                        | * |
| Turnbull A, Tindall VR, Beard RW, Robson G, Dawson IM, Cloake EP, Ashley JS, Botting B. Report on Confidential Enquiries into Maternal Deaths in England and Wales 1982-1984. Rep Health Soc Subj (Lond). 1989; 34: 1-166.                                                                                                                                         | 1982-1984                        | * |
| Wildman K, Bouvier-Colle M-H, MOMS Group. Maternal mortality as an indicator of obstetric care in Europe. BJOG. 2004; 111(2): 164-9.                                                                                                                                                                                                                               | 1992-1995                        | * |
| Eagles JM, Lee AJ, Raja EA, Millar HR, Bhattacharya S. Pregnancy outcomes of women with and without a history of anorexia nervosa. Psychol Med. 2012; 42(12): 2651-60.                                                                                                                                                                                             | 1965-2007                        | * |
| Oteng-Ntim E, Kopeika J, Seed P, Wandiembe S, Doyle P. Impact of obesity on pregnancy outcome in different ethnic groups: calculating population attributable fractions. PLoS One. 2013; 8(1): e53749.                                                                                                                                                             | 2004-2008                        | * |
| Akolekar R, Syngelaki A, Sarquis R, Zvanca M, Nicolaides KH. Prediction of early, intermediate and late pre-eclampsia from maternal factor biophysical and biochemical markers at 11-13 weeks. Prenat Diagn. 2011; 31(1): 66-74.                                                                                                                                   | 2006-2009                        | * |
| Denmedy MC, Avalos G, O'Reilly MW, O'Sullivan EP, Gaffney G, Dunne F. ATLANTIC-DIP: raised maternal body mass index (BMI) adversely affects maternal and fetal outcomes in glucose-tolerant women according to International Association of Diabetes and Pregnancy Study Groups (IADPSG) criteria. J Clin Endocrinol Metab. 2012; 97(4): E608-12.                  | 2006-2009                        | * |
| Kayem G, Kurinczuk JJ, Spark P, Brocklehurst P, Knight M, UK Obstetric Surveillance System. Maternal and obstetric factors associated with delay postpartum eclampsia: a national study population. Acta Obstet Gynecol Scand. 2011; 90(9): 1017-23.                                                                                                               | 2005-2006                        | * |
| Khalil A, Akolekar R, Syngelaki A, Elkhouli M, Nicolaides KH. Maternal hemodynamics at 11-13 weeks' gestation and risk of pre-eclampsia. Ultrasound Obstet Gynecol. 2012; 40(1): 28-34.                                                                                                                                                                            | 2009-2011                        | * |
| Khalil A, Rezende J, Akolekar R, Syngelaki A, Nicolaides KH. Maternal racial origin and adverse pregnancy outcome: a cohort study. Ultrasound Obstet Gynecol. 2013; 41(3): 278-85.                                                                                                                                                                                 | 2009-2011                        | * |
| North RA, McCowan LME, Dekker GA, Poston L, Chan EHY, Stewart AW, Black MA, Taylor RS, Walker JJ, Baker PN, Kenny LC. Clinical risk prediction for pre-eclampsia in nulliparous women: development of model in international prospective cohort. BMJ. 2011; d1875.                                                                                                 | 2004-2008                        | * |
| Roberts CL, Ford JB, Algert CS, Antonsen S, Chalmers J, Cnattingius S, Gokhale M, Kotelchuck M, Melve KK, Langridge A, Morris C, Morris JM, Nassar N, Norman JE, Norrie J, Sorensen HT, Walker R, Weir CJ. Population-based trends in pregnancy hypertension and pre-eclampsia: an international comparative study. BMJ Open. 2011; 1(1): e000101.                 | 1997-2006                        | * |
| Smits LJM, North RA, Kenny LC, Myers J, Dekker GA, McCowan LME. Patterns of vaginal bleeding during the first 20 weeks of pregnancy and risk pre-eclampsia in nulliparous women: results from the SCOPE study. Acta Obstet Gynecol Scand. 2012; 91(11): 1331-8.                                                                                                    | 2004-2008                        | * |
| Wright D, Akolekar R, Syngelaki A, Poon LCY, Nicolaides KH. A competing risks model in early screening for preeclampsia. Fetal Diagn Ther. 2013; 32(3): 171-8.                                                                                                                                                                                                     | 2006-2010                        | * |
| Livshits G, Zhai G, Hart DJ, Kato BS, Wang H, Williams FM, Spector TD. Interleukin-6 is a significant predictor of radiographic knee osteoarthritis The Chingford study. Arthritis Rheum. 2009; 60(7): 2037-45.                                                                                                                                                    | 1989                             | * |
| Ipsos MORI, NHS England. United Kingdom - England General Practitioner Patient Survey 2012-2013. Redditch, England: NHS England.                                                                                                                                                                                                                                   | 2012-2013                        | * |
| Kurtz Z, Tooke P, Ross E. Epilepsy in young people: 23 year follow up of the British national child development study. BMJ. 1998; 316(7128): 33-42.                                                                                                                                                                                                                | 1958-1981, 1984                  | * |
| MacDonald BK, Cockerell OC, Sander JW, Shorvon SD. The incidence and lifetime prevalence of neurological disorders in a prospective community based study in the UK. Brain. 2000; 123 ( Pt 4): 665-76.                                                                                                                                                             | 1996                             | * |
| Cockerell OC, Ecker I, Goodridge DM, Sander JW, Shorvon SD. Epilepsy in a population of 6000 re-examined: secular trends in first attendance rate prevalence, and prognosis. J Neurol Neurosurg Psychiatry. 1995; 58(5): 570-6.                                                                                                                                    | 1983                             | * |
| Heaney DC, MacDonald BK, Everitt A, Stevenson S, Leonardi GS, Wilkinson P, Sander JW. Socioeconomic variation in incidence of epileps prospective community based study in south east England. BMJ. 2002; 325(7371): 1013-6.                                                                                                                                       | 1995-1997                        | * |
| Hamdy NA, Ginby D, Felthower R, Ferrie CD. Ethnic differences in the incidence of seizure disorders in children from Bradford, United Kingdom. Epilepsia. 2007; 48(5): 913-6.                                                                                                                                                                                      | 1999-2000                        | * |
| Tallis R, Hall G, Craig I, Dean A. How common are epileptic seizures in old age? Age Ageing. 1991; 20(6): 442-4                                                                                                                                                                                                                                                    | 1989                             | * |
| Hart YM, Shorvon SD. The nature of epilepsy in the general population. I. Characteristics of patients receiving medication for epilepsy. Epilepsy Res. 1995; 21(1): 43-9.                                                                                                                                                                                          | 1994                             | * |
| Tidman L, Saravanan K, Gibbs J. Epilepsy in mainstream and special educational primary school settings. Seizure. 2003; 12(1): 47-51.                                                                                                                                                                                                                               | 1996-1997                        | * |
| Verity CM, Ross EM, Golding J. Epilepsy in the first 10 years of life: findings of the child health and education study. BMJ. 1992; 305(6858): 857-61                                                                                                                                                                                                              | 1980                             | * |



|                                                                                                                                                                                                                                                                                                                                                                                                                                    |                                    |   |
|------------------------------------------------------------------------------------------------------------------------------------------------------------------------------------------------------------------------------------------------------------------------------------------------------------------------------------------------------------------------------------------------------------------------------------|------------------------------------|---|
| Wallace H, Shorvon S, Tallis R. Age-specific incidence and prevalence rates of treated epilepsy in an unselected population of 2,052,922 and age specific fertility rates of women with epilepsy. <i>Lancet</i> . 1998; 352(9145): 1970-3.                                                                                                                                                                                         | 1995                               | * |
| Wright J, Pickard N, Whitfield A, Hakin N. A population-based study of the prevalence, clinical characteristics and effect of ethnicity in epilepsy. <i>Seizure</i> . 2000; 9(5): 309-13.                                                                                                                                                                                                                                          | 1998                               | * |
| Mohanraj R, Norrie J, Stephen LJ, Kelly K, Hittis N, Brodie MJ. Mortality in adults with newly diagnosed and chronic epilepsy: a retrospective comparative study. <i>Lancet Neurol</i> . 2006; 5(6): 481-7.                                                                                                                                                                                                                        | 1981-2001                          | * |
| Raymond NT, Zehnder D, Smith SC, Stinson JA, Lehnert H, Higgins RM. Elevated relative mortality risk with mild-to-moderate chronic kidney disease decreases with age. <i>Nephrol Dial Transplant</i> . 2007; 22(11): 3214-20.                                                                                                                                                                                                      | 2000-2003                          |   |
| Adamson JA, Price GM, Breeze E, Bulpitt CJ, Fletcher AE. Are older people dying of depression? Findings from the Medical Research Council trial of the assessment and management of older people in the community. <i>J Am Geriatr Soc</i> . 2005; 53(7): 1128-32.                                                                                                                                                                 | 1996-2001                          |   |
| Copeland JR, Beekman AT, Dewey ME, Hooijer C, Jordan A, Lawlor BA, Lobo A, Magnusson H, Mann AH, Meller I, Prince MJ, Reischies F, Turrisi C, deVries MW, Wilson KC. Depression in Europe. Geographical distribution among older people. <i>Br J Psychiatry</i> . 1999; 174: 312-21.                                                                                                                                               | 1993-1994                          |   |
| Jenkins R, Lewis G, Bebbington P, Brugha T, Farrell M, Gill B, Meltzer H. The National Psychiatric Morbidity surveys of Great Britain-initial findings from the household survey. <i>Psychol Med</i> . 1997; 27(4): 775-89.                                                                                                                                                                                                        | 1993                               |   |
| Lépine JP, Gastpar M, Mendlewicz J, Tylee A. Depression in the community: the first pan-European study DEPRES (Depression Research in Europe Society). <i>Int Clin Psychopharmacol</i> . 1997; 12(1): 19-29.                                                                                                                                                                                                                       | 1995                               |   |
| Meltzer H, Gatward R, Goodman R, Ford T. Mental health of children and adolescents in Great Britain. <i>Int Rev Psychiatry</i> . 2003; 15(1-2): 185-7.                                                                                                                                                                                                                                                                             | 1999                               |   |
| Saunders PA, Copeland JR, Dewey ME, Gilmore C, Larkin BA, Phateerakar H, Scott A. The prevalence of dementia, depression and neurosis in late life: the Liverpool MRC-ALPHA Study. <i>Int J Epidemiol</i> . 1993; 22(5): 838-47.                                                                                                                                                                                                   | 1986-1989                          |   |
| McDougall FA, Kvaal K, Matthews FE, Paykel E, Jones PB, Dewey ME, Brayne C. Medical Research Council Cognitive Function and Ageing Study. Prevalence of depression in older people in England and Wales: the MRC CFA Study. <i>Psychol Med</i> . 2007; 37(12): 1787-95.                                                                                                                                                            | 1990-1994                          | * |
| Baron-Cohen S, Scott FJ, Allison C, Williams J, Bolton P, Matthews FE, Brayne C. Prevalence of autism-spectrum conditions: UK school-based population study. <i>Br J Psychiatry</i> . 2009; 194(6): 500-9.                                                                                                                                                                                                                         | 2005-2006                          | * |
| Howlin P, Goode S, Hutton J, Rutter M. Adult outcome for children with autism. <i>J Child Psychol Psychiatry</i> . 2004; 45(2): 212-29.                                                                                                                                                                                                                                                                                            | 1970-1988                          |   |
| Brewin J, Cantwell R, Dalkin T, Fox R, Medley I, Glazebrook C, Kwiecinski R, Harrison G. Incidence of schizophrenia in Nottingham. A comparison of two cohorts, 1978-80 and 1992-94. <i>Br J Psychiatry</i> . 1997; 171: 140-4.                                                                                                                                                                                                    | 1992-1994                          | * |
| Brown S, Kim M, Mitchell C, Inskip H. Twenty-five year mortality of a community cohort with schizophrenia. <i>Br J Psychiatry</i> . 2010; 196(2): 116-21.                                                                                                                                                                                                                                                                          | 1981-1982                          | * |
| Kirkbride JB, Crouace T, Brewin J, Donoghue K, Mason P, Glazebrook C, Medley I, Harrison G, Cooper JE, Doody GA, Jones PB. Is the incidence of psychotic disorder in decline? Epidemiological evidence from two decades of research. <i>Int J Epidemiol</i> . 2009; 38(5): 1255-64.                                                                                                                                                | 1992-1994                          | * |
| Pantelis C, Taylor J, Campbell P. The South Camden schizophrenia survey – an experience of community-based research. <i>Psychiatric Bulletin</i> . 198 12(3): 98-101.                                                                                                                                                                                                                                                              | 1985                               |   |
| World Health Organization (WHO). WHO Tuberculosis Case Notifications. Geneva, Switzerland: World Health Organization (WHO).                                                                                                                                                                                                                                                                                                        | 1998, 2001, 2004, 2007, 2010, 2012 |   |
| Office for National Statistics. Social and Vital Statistics Division et al. . Mental Health of Children and Young People in Great Britain, 2004 [computer file]. Colchester, Essex: UK Data Archive [distributor], October 2005. SN: 5269, <a href="http://dx.doi.org/10.5255/UKDA-SN-5269-1">http://dx.doi.org/10.5255/UKDA-SN-5269-1</a>                                                                                         | 2004                               |   |
| National Centre for Social Research and University of Leicester. Adult Psychiatric Morbidity Survey, 2007 [computer file]. 3rd Edition. Colchester, Essex: UK Data Archive [distributor], January 2011. SN: 6379, <a href="http://dx.doi.org/10.5255/UKDA-SN-6379-1">http://dx.doi.org/10.5255/UKDA-SN-6379-1</a>                                                                                                                  | 2007                               |   |
| Bevan CD, Ridgway GL, Rothenel CD. Efficacy and safety of azithromycin as monotherapy or combined with metronidazole compared with two standard multidrug regimens for the treatment of acute pelvic inflammatory disease. <i>J Int Med Res</i> . 2003; 31(1): 45-54.                                                                                                                                                              | 2001-2002                          | * |
| Piyadigamage A, Wilson JD. An audit of outpatient management of pelvic inflammatory disease. <i>Int J STD AIDS</i> . 2002; 13(8): 577-9.                                                                                                                                                                                                                                                                                           | 2000                               | * |
| Bevan CD, Johal BJ, Mumtaz G, Ridgway GL, Siddall NC. Clinical, laparoscopic and microbiological findings in acute salpingitis: report on a United Kingdom cohort. <i>Br J Obstet Gynaecol</i> . 1995; 102(5): 407-14.                                                                                                                                                                                                             | 1989-1993                          | * |
| Simms I, Stephenson JM, Mallinson H, Peeling RW, Thomas K, Gokhale R, Rogers PA, Hay P, Oakeshott P, Hopwood J, Birley H, Hernon M. Risk factors associated with pelvic inflammatory disease. <i>Sex Transm Infect</i> . 2006; 82(6): 452-7.                                                                                                                                                                                       | 2000-2002                          | * |
| Office for National Statistics. Social Survey Division, Mental Health of Young People Looked After by Local Authorities in Great Britain, 2001-2003[computer file]. Colchester, Essex: UK Data Archive [distributor], December 2005. SN: 5280, <a href="http://dx.doi.org/10.5255/UKDA-SN-5280-1">http://dx.doi.org/10.5255/UKDA-SN-5280-1</a>                                                                                     | 2001-2003                          | * |
| Office for National Statistics. ONS Survey of Psychiatric Morbidity among Prisoners in England and Wales, 1997 [computer file]. Colchester, Essex: UK Data Archive [distributor], February 2001. SN: 4320, <a href="http://dx.doi.org/10.5255/UKDA-SN-4320-1">http://dx.doi.org/10.5255/UKDA-SN-4320-1</a>                                                                                                                         | 1997                               | * |
| Evans JR, Fletcher AE, Wormald RPL. Age-related macular degeneration causing visual impairment in people 75 years or older in Britain: an add-on study to the Medical Research Council Trial of Assessment and Management of Older People in the Community. <i>Ophthalmology</i> . 2004; 111(3): 513-7.                                                                                                                            | 1995-2000                          |   |
| United Kingdom - England and Wales National Congenital Anomaly System Data 1993-1998 - WHO as it appears in the European Surveillance of Congenital Anomalies (EUROCAT), International Centre on Birth Defects, World Health Organization (WHO). World Atlas of Birth Defects. 2nd ed. Geneva, Switzerland: World Health Organization (WHO), 2003.                                                                                 | 1993-1998                          | * |
| Morris-Cunnington M, Brown D, Pimenta J, Robinson NJ, Miller E. New estimates of herpes simplex virus type 2 seroprevalence in England: "high but stable seroprevalence over the last decade. <i>Sex Transm Dis</i> . 2004; 31(4): 243-6.                                                                                                                                                                                          | 1991, 2000                         | * |
| Narouz N, Allan PS, Wade AH, Wagstaffe S. Genital herpes serotyping: a study of the epidemiology and patients' knowledge and attitude among STI clinic attendees in Coventry, UK. <i>Sex Transm Infect</i> . 2003; 79(1): 35-41.                                                                                                                                                                                                   | 1993-2002                          | * |
| Evans BA, Kell PD, Bond RA, MacRae KD, Slomka MJ, Brown DWG. Predictors of seropositivity to herpes simplex virus type 2 in women. <i>Int J STD AIDS</i> . 2003; 14(1): 30-6.                                                                                                                                                                                                                                                      | 1992, 2000-2002                    | * |
| Opameye AA, Bashford J. Seroprevalence of antibodies to herpes simplex viruses 1 and 2 among two sexually active female populations Middlesbrough, England. <i>J R Soc Promot Health</i> . 2002; 122(2): 108-11.                                                                                                                                                                                                                   | 1992, 1996-1997                    | * |
| Yates HL, McCullough S, Harrison C, Gill AB. Hypoxic ischaemic encephalopathy: accuracy of the reported incidence. <i>Arch Dis Child Fetal Neonatal Ed</i> . 2012; 97(1): F77-78.                                                                                                                                                                                                                                                  | 2006-2009                          | * |
| Yeh P, Emery K, Impey L. The relationship between umbilical cord arterial pH and serious adverse neonatal outcome: analysis of 51,519 consecutively validated samples. <i>BJOG</i> . 2012; 119(7): 824-31.                                                                                                                                                                                                                         | 1991-2009                          | * |
| Becher J-C, Stenson BJ, Lyon AJ. Is intrapartum asphyxia preventable? <i>BJOG</i> . 2007; 114(11): 1442-4                                                                                                                                                                                                                                                                                                                          | 1994-2005                          | * |
| Hull J, Dodd KL. Falling incidence of hypoxic-ischaemic encephalopathy in term infants. <i>Br J Obstet Gynaecol</i> . 1992; 99(5): 386-91.                                                                                                                                                                                                                                                                                         | 1984-1988                          | * |
| Levene ML, Kornberg J, Williams TH. The incidence and severity of post-asphyxial encephalopathy in full-term infants. <i>Early Hum Dev</i> . 1985; 11(1): 21-6.                                                                                                                                                                                                                                                                    | 1980-1983                          | * |
| Smith J, Wells L, Dodd K. The continuing fall in incidence of hypoxic-ischaemic encephalopathy in term infants. <i>BJOG</i> . 2000; 107(4): 461-6.                                                                                                                                                                                                                                                                                 | 1992-1996                          | * |
| Azzopardi DV, Strohm B, Edwards AD, Dyet L, Halliday HL, Juszczak E, Kapellou O, Levene M, Marlow N, Porter E, Thoresen M, Whitelaw A, Brocklehurst P, TOBY Study Group. Moderate hypothermia to treat perinatal asphyxial encephalopathy. <i>N Engl J Med</i> . 2009; 361(14): 1349-58.                                                                                                                                           | 2002-2006                          | * |
| Barnett A, Mercuri E, Rutherford M, Haataja L, Frisone MF, Henderson S, Cowan F, Dubowitz L. Neurological and perceptual-motor outcome at 5 - 6 years of age in children with neonatal encephalopathy: relationship with neonatal brain MRI. <i>Neuropediatrics</i> . 2002; 33(5): 242-8.                                                                                                                                          | 1991-1996                          | * |
| Williams L, Parker H. Alcohol, cannabis, ecstasy and cocaine: Drugs of reasoned choice amongst young adult recreational drug users in England. <i>In Drug Policy</i> . 1999; 12(5-6): 397-413.                                                                                                                                                                                                                                     | 1995, 1999                         | * |
| United Kingdom - England and Wales National Congenital Anomaly System Data 2001 - ICBDMs as it appears in the International Clearinghouse for Birth Defects Monitoring Systems. International Clearinghouse for Birth Defects Monitoring Systems Annual Report 2003. Rome, Italy: International Centre on Birth Defects.                                                                                                           | 2001                               | * |
| Song SH, Gray TA. Early-onset type 2 diabetes: high risk for premature diabetic retinopathy. <i>Diabetes Res Clin Pract</i> . 2011; 94(2): 207-11.                                                                                                                                                                                                                                                                                 | 2008-2010                          |   |
| Abbott CA, Carrington AL, Ashe H, Bath S, Every LC, Griffiths J, Hann AW, Hussein A, Jackson N, Johnson KE, Ryder CH, Torkington R, Van Rossum ERE, Whalley AM, Widdows P, Williamson S, Boulton AJM. North-West Diabetes Foot Care Study. The North-West Diabetes Foot Care Study: incidence of, and risk factors for, new diabetic foot ulceration in a community-based patient cohort. <i>Diabet Med</i> . 2002; 19(5): 377-84. | 1994-1996                          |   |

|                                                                                                                                                                                                                                                                                                                                                                                                                                  |                       |   |
|----------------------------------------------------------------------------------------------------------------------------------------------------------------------------------------------------------------------------------------------------------------------------------------------------------------------------------------------------------------------------------------------------------------------------------|-----------------------|---|
| Canavan RJ, Unwin NC, Kelly WF, Connolly VM. Diabetes- and nondiabetes-related lower extremity amputation incidence before and after the introduction of better organized diabetes foot care: continuous longitudinal monitoring using a standard method. <i>Diabetes Care</i> . 2008; 31(3): 459-63.                                                                                                                            | 1995-2000             |   |
| Cohen DL, Neil HA, Thorogood M, Mann JI. A population-based study of the incidence of complications associated with type 2 diabetes in the elder. <i>Diabet Med</i> . 1991; 8(10): 928-33.                                                                                                                                                                                                                                       | 1982-1988             |   |
| Vanderpump MP, Tunbridge WM, French JM, Appleton D, Bates D, Rodgers H, Evans JG, Clark F, Tunbridge F, Young ET. The incidence of diabetes mellitus in an English community: a 20-year follow-up of the Whickham Survey. <i>Diabet Med</i> . 1996; 13(8): 741-7.                                                                                                                                                                | 1992-1993             |   |
| Button EJ, Chadalavada B, Palmer RL. Mortality and predictors of death in a cohort of patients presenting to an eating disorders service. <i>Int J E Disord</i> . 2010; 43(5): 387-92.                                                                                                                                                                                                                                           | 1992-2007             | * |
| Crisp A. 1.6. Death, survival and recovery in anorexia nervosa: a thirty five year study. <i>Eur Eat Disord Rev</i> . 2006; 14(3): 168-75.                                                                                                                                                                                                                                                                                       | 1960-1990             | * |
| Collings S, King M. Ten-year follow-up of 50 patients with bulimia nervosa. <i>Br J Psychiatry</i> . 1994; 164(1): 80-7.                                                                                                                                                                                                                                                                                                         | 1981-1991             | * |
| Fairburn CG, Cooper Z, Doll HA, Norman P, O'Connor M. The natural course of bulimia nervosa and binge eating disorder in young women. <i>Arch Gen Psychiatry</i> . 2000; 57(7): 659-65.                                                                                                                                                                                                                                          | 1993-1998             | * |
| Bargagli AM, Hickman M, Davoli M, Perucci CA, Schifano P, Buster M, Brugal T, Vicente J, COSMO European Group. Drug-related mortality and impact on adult mortality in eight European countries. <i>Eur J Public Health</i> . 2006; 16(2): 198-202.                                                                                                                                                                              | 1997-2001             | * |
| De Angelis D, Hickman M, Yang S. Estimating long-term trends in the incidence and prevalence of opiate use/injecting drug use and the number of former users: back-calculation methods and opiate overdose deaths. <i>Am J Epidemiol</i> . 2004; 160(10): 994-1004.                                                                                                                                                              | 2000                  | * |
| Frischer M, Hickman M, Kraus L, Mariani F, Wiessing L. A comparison of different methods for estimating the prevalence of problematic drug misuse in Great Britain. <i>Addiction</i> . 2001; 96(10): 1465-76.                                                                                                                                                                                                                    | 1996                  | * |
| Ghosh D, Oyefeso A, Kilpatrick B. Mortality of drug addicts in the United Kingdom 1967-1993. <i>Int J Epidemiol</i> . 1998; 27(3): 473-8.                                                                                                                                                                                                                                                                                        | 1967-1993             | * |
| Oppenheimer E, Tobutt C, Taylor C, Andrew T. Death and survival in a cohort of heroin addicts from London clinics: a 22-year follow-up study. <i>Addiction</i> . 1994; 89(10): 1299-308.                                                                                                                                                                                                                                         | 1969-1991             | * |
| Rathod NHR, Addenbrooke WM, Rosenbach AF. Heroin dependence in an English town: 33-year follow-up. <i>Br J Psychiatry</i> . 2005; 187(5): 421-5.                                                                                                                                                                                                                                                                                 | 1966-1999             | * |
| Erdohazi M, Highman W. Glucose-6-phosphate-dehydrogenase deficiency in Britain. <i>Lancet</i> . 1962; 280(7268): 127.                                                                                                                                                                                                                                                                                                            | 1960-1962             |   |
| Bebington P, Jonas S, Kuipers E, King M, Cooper C, Brugha T, Meltzer H, McManus S, Jenkins R. Childhood sexual abuse and psychosis: data from a cross-sectional national psychiatric survey in England. <i>Br J Psychiatry</i> . 2011; 199(1): 29-37.                                                                                                                                                                            | 2006-2007             | * |
| United Kingdom - England and Wales National Congenital Anomaly System Data 2003 - ICBDSR as it appears in International Clearinghouse for Birth Defects Surveillance and Research. International Clearinghouse for Birth Defects Surveillance and Research Annual Report 2005. Rome, Italy: International Clearinghouse for Birth Defects Surveillance and Research, 2007.                                                       | 2003                  | * |
| United Kingdom - England and Wales National Congenital Anomaly System Data 2004 - ICBDSR as it appears in International Clearinghouse for Birth Defects Surveillance and Research. International Clearinghouse for Birth Defects Surveillance and Research Annual Report 2006. Rome, Italy: International Clearinghouse for Birth Defects Surveillance and Research, 2007.                                                       | 2004                  | * |
| United Kingdom - Wessex Antenatally Detected Anomalies Register Data 2007 - ICBDSR as it appears in International Clearinghouse for Birth Defects Surveillance and Research. International Clearinghouse for Birth Defects Surveillance and Research Annual Report 2009. Rome, Italy: International Clearinghouse for Birth Defects Surveillance and Research.                                                                   | 2007                  | * |
| United Kingdom - Wessex Antenatally Detected Anomalies Register Data 2008 - ICBDSR as it appears in International Clearinghouse for Birth Defects Surveillance and Research. International Clearinghouse for Birth Defects Surveillance and Research Annual Report 2010. Rome, Italy: International Clearinghouse for Birth Defects Surveillance and Research, 2011.                                                             | 2008                  | * |
| Demography of dialysis and transplantation in Europe in 1985 and 1986: trends over the previous decade. Report from the European Dialysis and Transplant Association Registry. <i>Nephrol Dial Transplant</i> . 1988; 3(6): 714-27.                                                                                                                                                                                              | 1985                  |   |
| Van Dijk PC, Jager KJ, Stengel B, Grönhagen-Riska C, Feest TG, Briggs JD. Renal replacement therapy for diabetic end-stage renal disease: data from 10 registries in Europe (1991-2000). <i>Kidney Int</i> . 2005; 67(4): 1489-99.                                                                                                                                                                                               | 1991-1992, 1999-2000  |   |
| Trends in the incidence of renal replacement therapy for end-stage renal disease in Europe, 1990-1999. Trends in the incidence of renal replacement therapy for end-stage renal disease in Europe, 1990-1999. <i>Nephrol Dial Transplant</i> . 2003; 18(9): 1824-33.                                                                                                                                                             | 1990-1991, 1998-1999  |   |
| European Surveillance of Congenital Anomalies (EUROCAT). United Kingdom EUROCAT Prevalence Tables, Individual Registries and Countries. Newtownabbey, Northern Ireland: European Surveillance of Congenital Anomalies (EUROCAT).                                                                                                                                                                                                 | 1980-2011             |   |
| Global Lower Extremity Amputation Study Group. Epidemiology of lower extremity amputation in centres in Europe, North America and East Asia. The Global Lower Extremity Amputation Study Group. <i>Br J Surg</i> . 2000; 87(3): 328-37.                                                                                                                                                                                          | 1995-1997             |   |
| Schofield CJ, Yu N, Jain AS, Leese GP. Decreasing amputation rates in patients with diabetes-a population-based study. <i>Diabet Med</i> . 2009; 26(8): 773-7.                                                                                                                                                                                                                                                                   | 2000-2006             |   |
| Leggetter S, Chaturvedi N, Fuller JH, Edmonds ME. Ethnicity and risk of diabetes-related lower extremity amputation: a population-based, case-control study of African Caribbeans and Europeans in the United Kingdom. <i>Arch Intern Med</i> . 2002; 162(1): 73-8.                                                                                                                                                              | 1992-1997             |   |
| Michelmores KF, Balen AH, Dunger DB, Vessey MP. Polycystic ovaries and associated clinical and biochemical features in young women. <i>Clin Endocrinol (Oxf)</i> . 1999; 51(6): 779-86.                                                                                                                                                                                                                                          | 1996-1997             |   |
| Cleland JGF, Swedberg K, Follath F, Komajda M, Cohen-Solal A, Aguilar JC, Dietz R, Gavazzi A, Hobbs R, Korewicki J, Madeira HC, Moiseyev VS, Preda I, Gilst WH van, Widimsky J, Freemantle N, Eastaugh J, Mason J. The EuroHeart Failure survey programme - a survey on the quality of care among patients with heart failure in Europe Part I: patient characteristics and diagnosis. <i>Eur Heart J</i> . 2003; 24(5): 442-63. | 2000-2001             |   |
| Parkin DM, International Agency for Research on Cancer, International Association of Cancer Registries. Cancer incidence in five continents. Volume I to VIII. Lyon, France, IARC Press, 2005.                                                                                                                                                                                                                                   | 1985                  |   |
| United Kingdom - England and Wales Congenital Malformation Monitoring Program Data 1981 - ICBDSR as it appears in International Clearinghouse for Birth Defects Monitoring Systems. Congenital Malformations Worldwide: A Report from the International Clearinghouse for Birth Defects Monitoring Systems. Amsterdam, Netherlands: Elsevier, 1991.                                                                              | 1981                  | * |
| Morris AJ, Steele J, White DA. The oral cleanliness and periodontal health of UK adults in 1998. <i>Br Dent J</i> . 2001; 191(4): 186-92.                                                                                                                                                                                                                                                                                        | 1998                  |   |
| United Kingdom National Diet and Nutrition Survey: Young People Aged 4 to 18 Years 1997 as it appears in Global Dietary Database Consortium, Nutrition and Chronic Disease Expert Group (NutriCoDE). Global Dietary Database 1980-2011. [Unpublished].                                                                                                                                                                           | 1997                  |   |
| United Kingdom National Diet and Nutrition Survey: People Aged 65 Years and Over 1994-1995 as it appears in Global Dietary Database Consortium, Nutrition and Chronic Disease Expert Group (NutriCoDE). Global Dietary Database 1980-2011. [Unpublished].                                                                                                                                                                        | 1994-1995             |   |
| United Kingdom National Diet, Nutrition, and Dental Survey of Children Aged 1 1/2 to 4 1/2 Years 1992-1993 as it appears in Global Dietary Database Consortium, Nutrition and Chronic Disease Expert Group (NutriCoDE). Global Dietary Database 1980-2011. [Unpublished].                                                                                                                                                        | 1992-1993             |   |
| United Kingdom Low Income Diet and Nutrition Survey 2003-2005 as it appears in Global Dietary Database Consortium, Nutrition and Chronic Disease Expert Group (NutriCoDE). Global Dietary Database 1980-2011. [Unpublished].                                                                                                                                                                                                     | 2003-2005             |   |
| National Centre for Social Research (NatCen), University of Leicester. Adult Psychiatric Morbidity in England, 2007: Results of a Household Survey. Leeds, England: Information Centre for Health and Social Care, NHS, 2009.                                                                                                                                                                                                    | 2007                  |   |
| Office for National Statistics (United Kingdom). United Kingdom General Lifestyle Survey 2010 - ONS. Newport, United Kingdom: Office for National Statistics (United Kingdom), 2012.                                                                                                                                                                                                                                             | 2010                  |   |
| Nicholls P, Edwards G, Kyle E. Alcoholics admitted to four hospitals in England. II. General and cause-specific mortality. <i>Q J Stud Alcohol</i> . 1973; 35(3): 841-55.                                                                                                                                                                                                                                                        | 1953-1967             |   |
| Hirst C, Swingle R, Compston DA, Ben-Shlomo Y and Robertson NP. Survival and cause of death in multiple sclerosis: a prospective population based study. <i>J Neurol Neurosurg Psychiatry</i> . 2008; 79(9): 1016-21.                                                                                                                                                                                                            | 1985-2005             | * |
| Roberts SE, Williams JG, Meddings D, Goldacre MJ. Incidence and case fatality for acute pancreatitis in England: geographical variation, social deprivation, alcohol consumption and aetiology - a record linkage study. <i>Aliment Pharmacol Ther</i> . 2008; 28(7): 931-41.                                                                                                                                                    | 1998-2003             | * |
| Walker RW, Hand A, Jones C, Wood BH, Gray WK. The prevalence of Parkinson's disease in a rural area of North-East England. <i>Parkinsonism Rel Disord</i> . 2010; 16(9): 572-5.                                                                                                                                                                                                                                                  | 2007-2008             | * |
| Yarnell JW, Voyle GJ, Sweetnam PM, Milbank J, Richards CJ, Stephenson TP. Factors associated with urinary incontinence in women. <i>J Epidemiol Community Health</i> . 1982; 36(1): 58-63.                                                                                                                                                                                                                                       | 1979                  |   |
| Walsh K, Cruddas M, Coggon D. Low back pain in eight areas of Britain. <i>J Epidemiol Community Health</i> . 1992; 46(3): 227-3.                                                                                                                                                                                                                                                                                                 | 1989                  | * |
| Goldwater LJ, Hoover AW. An international study of "normal" levels of lead in blood and urine. <i>Arch Environ Health</i> . 1967; 15(1): 60-3.                                                                                                                                                                                                                                                                                   | 1964                  |   |
| Thomas VM, Socolow RH, Fanelli JJ, Spiro TG. Effects of Reducing Lead in Gasoline: An Analysis of the International Experience. <i>Environ Sci Technol</i> . 1999; 33(22): 3942-8.                                                                                                                                                                                                                                               | 1979-1980, 1984, 1995 |   |

|                                                                                                                                                                                                                                                                                                                                                                                                             |                  |   |
|-------------------------------------------------------------------------------------------------------------------------------------------------------------------------------------------------------------------------------------------------------------------------------------------------------------------------------------------------------------------------------------------------------------|------------------|---|
| Quinn MJ, Delves HT. UK Blood Lead Monitoring Programme 1984-1987: protocol and results for 1984. <i>Hum Toxicol.</i> 1987; 6(6): 459-74.                                                                                                                                                                                                                                                                   | 1984             |   |
| O'Donohoe J, Chalkley S, Richmond J, Barltrop D. Blood lead in U.K. children--time for a lower action level? <i>Clin Sci (Lond).</i> 1998; 95(2): 219-23.                                                                                                                                                                                                                                                   | 1991             |   |
| Lewendon G, Kinra S, Nelder R, Cronin T. Should children with developmental and behavioural problems be routinely screened for lead? <i>Arch D Child.</i> 2001; 85(4): 286-8.                                                                                                                                                                                                                               | 1998             |   |
| Dennison EM, Syddall HE, Sayer AA, Martin HJ, Cooper C. Lipid profile, obesity and bone mineral density: the Hertfordshire Cohort Study. <i>QJ Med.</i> 2007; 100(5): 297-303.                                                                                                                                                                                                                              | 1998-2003        |   |
| Kaptoge S, Reid D, Scheidt-Nave C, Poor G, Pols HA, Khaw K, Felsenberg D, Benevolenskaya L, Diaz M, Stepan J, Eastell R, Boonen S, Cannata J, Glueer C, Crabtree N, Kaufman J, Reeve J. Geographic and other determinants of BMD change in European men and women at the hip and spine. A population-based study from the Network in Europe for Male Osteoporosis (NEMO). <i>Bone.</i> 2007; 40(3): 662-73. | 2004             |   |
| Lunt M, Felsenberg D, Adams J, Benevolenskaya L, Cannata J, Dequeker J, Dodenhof C, Falch JA, Johnell O, Khaw KT, Masaryk P, Pols H, Poor G, Reid D, Scheidt-Nave C, Weber K, Silman AJ, Reeve J. Population-based geographic variations in DXA bone density in Europe: the EVOS Study. <i>European Vertebral Osteoporosis. Osteoporos Int.</i> 1997; 7(3): 175-89.                                         | 1994             |   |
| Macdonald HM, McGuigan FE, Stewart A, Black AJ, Fraser WD, Ralston S, Reid DM. Large-scale population-based study shows no evidence of association between common polymorphism of the VDR gene and BMD in British women. <i>J Bone Miner Res.</i> 2006; 21(1): 151-62.                                                                                                                                      | 1997-2000        |   |
| Petley GW, Cotton AM, Murrills AJ, Taylor PA, Cooper C, Cawley MI, Wilkin TJ. Reference ranges of bone mineral density for women in south England: the impact of local data on the diagnosis of osteoporosis. <i>Br J Radiol.</i> 1996; 69(823): 655-60.                                                                                                                                                    | 1993             |   |
| Spector TD, McCloskey EV, Doyle DV, Kanis JA. Prevalence of vertebral fracture in women and the relationship with bone density and symptoms: the Chingford Study. <i>J Bone Miner Res.</i> 1993; 8(7): 817-22.                                                                                                                                                                                              | 1989-1991        |   |
| Trivedi DP, Khaw KT. Bone mineral density at the hip predicts mortality in elderly men. <i>Osteoporos Int.</i> 2001; 12(4): 259-6                                                                                                                                                                                                                                                                           | 1991-1999        |   |
| Truscott JG, Simpson DS, Fordham JN. A suggested methodology for the construction of national bone densitometry reference ranges: 1372 Caucasian women from four UK sites. <i>Br J Radiol.</i> 1997; 70(840): 1245-51.                                                                                                                                                                                      | 1994             |   |
| Haberman S, Benjamin B, Capildeo R, Rose FC. North West Thames registry of neurological disease. <i>J R Soc Med.</i> 1982; 75(6): 443-9.                                                                                                                                                                                                                                                                    | 1978             |   |
| Hughes RA, Charlton J, Latinovic R, Gulliford MC. No association between immunization and Guillain-Barré syndrome in the United Kingdom, 19 to 2000. <i>Arch Intern Med.</i> 2006; 166(12): 1301-4.                                                                                                                                                                                                         | 1992-2000        |   |
| Rees JH, Thompson RD, Smeeton NC, Hughes RA. Epidemiological study of Guillain-Barré syndrome in south east England. <i>J Neurol Neurosurg Psychiatry.</i> 1998; 64(1): 74-7.                                                                                                                                                                                                                               | 1993-1994        |   |
| Sridharan GV, Tallis RC, Gautam PC. Guillain-Barré syndrome in the elderly. A retrospective comparative study. <i>Gerontology.</i> 1993; 39(3): 170-5.                                                                                                                                                                                                                                                      | 1980-1988        |   |
| Winner SJ, Evans JG. Guillain-Barré syndrome in Oxfordshire: clinical features in relation to age. <i>Age Ageing.</i> 1993; 22(3): 164-70.                                                                                                                                                                                                                                                                  | 1990-1992        |   |
| Winner SJ, Evans JG. Age specific incidence of Guillain-Barre syndrome in Oxfordshire. <i>Q J Med.</i> 1990; 77(3): 1297-130.                                                                                                                                                                                                                                                                               | 1974-1986        |   |
| Reddy S, Rangaiah J, Addiman S, Wareham D, Wilson P, Sefton A. Epidemiology, antibiotic resistance trends and the cost of enteric fever in Et London, 2005-2010. <i>Travel Med Infect Dis.</i> 2011; 9(4): 206-12.                                                                                                                                                                                          | 2006-2009        |   |
| Wagner KS, White JM, Lucenko I, Mercer D, Crowcroft NS, Neal S, Efstratiou A, Diphtheria Surveillance Network. Diphtheria in the postepidemic period, Europe, 2000-2009. <i>Emerg Infect Dis.</i> 2012; 18(2): 217-25.                                                                                                                                                                                      | 2000-2009        | * |
| Department of Peace and Conflict Research, Uppsala University. UCDP Battle-Related Deaths Database Version 5, 2013. Uppsala, Sweden<br>Department of Peace and Conflict Research, Uppsala University, 2013.                                                                                                                                                                                                 | 1989-2003        |   |
| Pugsley Z, Ballard K. Management of endometriosis in general practice: the pathway to diagnosis. <i>Br J Gen Pract.</i> 2007; 57(539): 470-6.                                                                                                                                                                                                                                                               | 2004             |   |
| Ballard KD, Seaman HE, de Vries CS, Wright JT. Can symptomatology help in the diagnosis of endometriosis? Findings from a national case-control study - Part I. <i>BJOG.</i> 2008; 115(11): 1382-91.                                                                                                                                                                                                        | 1992-2001        |   |
| Cox, B.D. Health and Lifestyle Survey, 1984-1985 [computer file]. Colchester, Essex: UK Data Archive [distributor], October 1988. SN: 2218<br><a href="http://dx.doi.org/10.5255/UKDA-SN-2218-1">http://dx.doi.org/10.5255/UKDA-SN-2218-1</a> .                                                                                                                                                             | 1984-1985        |   |
| Cox, B.D. Health and Lifestyle Survey: Seven-Year Follow-Up, 1991-1992 [computer file]. Colchester, Essex: UK Data Archive [distributor], January 1995. SN: 3279. <a href="http://dx.doi.org/10.5255/UKDA-SN-3279-1">http://dx.doi.org/10.5255/UKDA-SN-3279-1</a>                                                                                                                                           | 1991-1992        |   |
| Office for National Statistics. Social Survey Division, Adult Dental Health Survey, 1998 [computer file]. 2nd Edition. Colchester, Essex: UK Data Archive [distributor], October 2013. SN: 4226. <a href="http://dx.doi.org/10.5255/UKDA-SN-4226-2">http://dx.doi.org/10.5255/UKDA-SN-4226-2</a>                                                                                                            | 1998             |   |
| Davis A, Wood S, Healy R, Webb H, Rowe S. Risk factors for hearing disorders: epidemiologic evidence of change over time in the UK. <i>J Am Acad Audiol.</i> 1995; 6(5): 365-70.                                                                                                                                                                                                                            | 1983-1988        | * |
| Fortnum HM, Marshall DH, Summerfield AQ. Epidemiology of the UK population of hearing-impaired children, including characteristics of those with and without cochlear implants - audiology, aetiology, comorbidity and affluence. <i>Int J Audiol.</i> 2002; 41(3): 170-9.                                                                                                                                  | 1980-1998        | * |
| Parving A, Stephens D. Profound permanent hearing impairment in childhood: causative factors in two European countries. <i>Acta Otolaryngol.</i> 1997; 117(2): 158-60.                                                                                                                                                                                                                                      | 1975-1980        | * |
| Watkin P, Hasan J, Baldwin M, Ahmed M. Neonatal hearing screening: Have we taken the right road? Results from a 10-year targeted screen longitudinally followed up in a single district. <i>Audiol Med.</i> 2005; 3(3).                                                                                                                                                                                     | 1990-2000        | * |
| European Union Agency for Fundamental Rights. European Union Violence Against Women Study 2011                                                                                                                                                                                                                                                                                                              | 2012             | * |
| Health Protection Agency (United Kingdom), Joint United Nations Program on HIV/AIDS (UNAIDS). United Kingdom Global AIDS Response Report 2012. Geneva, Switzerland: Joint United Nations Program on HIV/AIDS (UNAIDS), 2012.                                                                                                                                                                                | 2010             | * |
| Matthews F, Brayne C, Medical Research Council Cognitive Function and Ageing Study Investigators. The incidence of dementia in England and Wales: findings from the five identical sites of the MRC CFA Study. <i>PLoS Med.</i> 2005; 2(8): e193.                                                                                                                                                           | 1990-1996        |   |
| Paykel ES, Brayne C, Huppert FA, Gill C, Barkley C, Gehlhaar E, Beardsall L, Girling DM, Pollitt P, O'Connor D. Incidence of dementia in population older than 75 years in the United Kingdom. <i>Arch Gen Psychiatry.</i> 1994; 51(4): 325-32.                                                                                                                                                             | 1985-1990        |   |
| Copeland JR, Dewey ME, Davidson IA, Saunders PA, Scott A. Geriatric Mental State-AGECAT: prevalence, incidence and long-term outcome of dementia and organic disorders in the Liverpool study of continuing health in the community. <i>Neuroepidemiology.</i> 1992; 84-7.                                                                                                                                  | 1982-1985        |   |
| Brayne C, Best N, Muir M, Richards SJ, Gill C. Five-year incidence and prediction of dementia and cognitive decline in a population sample of women aged 70-79 at baseline. <i>Int J Geriatr Psychiatry.</i> 1997; 12(11): 1107-18.                                                                                                                                                                         | 1994-1996        |   |
| O'Connor DW, Pollitt PA, Hyde JB, Fellows JL, Miller ND, Brook CP, Reiss BB, Roth M. The prevalence of dementia as measured by the Cambridge Mental Disorders of the Elderly Examination. <i>Acta Psychiatr Scand.</i> 1989; 79(2): 190-8.                                                                                                                                                                  | 1983-1986        |   |
| United Kingdom - England and Wales Vital Registration - Deaths 2011 ICD10 as it appears in World Health Organization (WHO). WHO Mortality Database Version February 2014. Geneva, Switzerland: World Health Organization (WHO), 2014.                                                                                                                                                                       | 2011             |   |
| Child Abuse Studies Unit, University of North London. United Kingdom - Great Britain Child Sexual Abuse Prevalence Survey 1989.                                                                                                                                                                                                                                                                             | 1989             |   |
| Baker AW, Duncan SP. Child sexual abuse: A study of prevalence in Great Britain. <i>Child Abuse Negl.</i> 1985; 9(4): 457-6'                                                                                                                                                                                                                                                                                | 1982             |   |
| Gallagher B, Bradford M, Pease K. Attempted and completed incidents of stranger-perpetrated child sexual abuse and abduction. <i>Child Abuse Negl.</i> 2008; 32(5): 517-28.                                                                                                                                                                                                                                 | 1996-1997        |   |
| May-Chahal C, Cawson P. Measuring child maltreatment in the United Kingdom: a study of the prevalence of child abuse and neglect. <i>Child Abuse Negl.</i> 2005; 29(9): 969-84.                                                                                                                                                                                                                             | 1998-1999        |   |
| European Centre for Disease Prevention and Control, WHO Regional Office for Europe (EURO-WHO). HIV/AIDS Surveillance in Europe 2012 Stockholm, Sweden: European Centre for Disease Prevention and Control, 2012.                                                                                                                                                                                            | 2006-2012        | * |
| Kuo C-F, Grainge MJ, Mallen C, Zhang W, Doherty M. Rising burden of gout in the UK but continuing suboptimal management: a nationwide population study. <i>Ann Rheum Dis.</i> 2014.                                                                                                                                                                                                                         | 1997-2012        | * |
| Sanmartin J, Queen Sofia Center for the Study of Violence. Partner Violence against Women: Statistics and Legislation, 2nd International Report 2000 Valencia, Spain: Queen Sofia Center for the Study of Violence, 2007.                                                                                                                                                                                   | 2003             |   |
| Sanmartin J, Molina A, Garcia Y, Queen Sofia Center for the Study of Violence. Partner Violence against Women: Statistics and Legislation International Report 2003. Valencia, Spain: Queen Sofia Center for the Study of Violence, 2003.                                                                                                                                                                   | 2000             |   |
| Queen Sofia Center for the Study of Violence. Partner Violence Against Women: Statistics and Legislation, 3rd International Report 2010. Valencia Spain: Queen Sofia Center for the Study of Violence, 2010.                                                                                                                                                                                                | 2006             |   |
| Gregory MJ, Milroy CM. Homicide and Suicide in Yorkshire and the Humber: 1975-1992 and 1993-2007. <i>Am J Forensic Med Pathol.</i> 2010; 31(1): 58-63.                                                                                                                                                                                                                                                      | 2006-2007        |   |
| European Environment Agency (EEA). EEA Airbase European Air Quality Database Version 7, 2013. Copenhagen, Denmark: European Environment Agency (EEA), 2013.                                                                                                                                                                                                                                                 | 2008-2011        | * |
| Convention on Long-Range Transboundary Air Pollution, United Nations Economic Commission for Europe. EBAS Database EMEP Framework European Monitoring and Evaluation Programme PM2.5 and PM10 Data 1999-2014.                                                                                                                                                                                               | 2008-2011        | * |
| World Health Organization (WHO). Progress towards the elimination of leprosy as a public health problem. Part I. <i>Wkly Epidemiol Rec.</i> 1995; 70(25): 177-82.                                                                                                                                                                                                                                           | 1994             | * |
| Health Protection Agency (United Kingdom). Tuberculosis in the UK: Report on Tuberculosis Surveillance in the UK 2010. London, England: Health Protection Agency (United Kingdom), 2010.                                                                                                                                                                                                                    | 2001, 2004, 2007 | * |

|                                                                                                                                                                                                                                                                                                                                                                                                                                |                      |   |
|--------------------------------------------------------------------------------------------------------------------------------------------------------------------------------------------------------------------------------------------------------------------------------------------------------------------------------------------------------------------------------------------------------------------------------|----------------------|---|
| Ades AE, Peckham CS, Dale GE, Best JM, Jeansson S. Prevalence of antibodies to herpes simplex virus types 1 and 2 in pregnant women, an estimated rates of infection. <i>J Epidemiol Community Health</i> . 1989; 43(1): 53-60.                                                                                                                                                                                                | 1980-1981            | * |
| Cowan FM, Johnson AM, Ashley R, Corey L, Mindel A. Antibody to herpes simplex virus type 2 as serological marker of sexual lifestyle populations. <i>BMJ</i> . 1994; 309(6965): 1325-9.                                                                                                                                                                                                                                        | 1990-1992            | * |
| Jha PK, Beral V, Peto J, Hack S, Hermon C, Deacon J, Mant D, Chilvers C, Vessey MP, Pike MC. Antibodies to human papillomavirus and to other genital infectious agents and invasive cervical cancer risk. <i>Lancet</i> . 1993; 341(8853): 1116-8.                                                                                                                                                                             | 1990                 | * |
| Pebody RG, Andrews N, Brown D, Gopal R, De Melker H, François G, Gatcheva N, Hellenbrand W, Jokinen S, Klavs I, Kojouharova M, Kortbeek T, Kriz B, Proseck K, Roubalova K, Teocharov P, Thierfelder W, Valle M, Van Damme P, Vranckx R. The seroepidemiology of herpes simplex virus type 1 and 2 in Europe. <i>Sex Transm Infect</i> . 2004; 80(3): 185-91.                                                                   | 1994                 | * |
| Khawaja AP, Chan MPY, Hayat S, Broadway DC, Luben R, Garway-Heath DF, Sherwin JC, Yip JLY, Dalzell N, Wareham NJ, Khaw K-T, Foster PJ. The EPIC-Norfolk Eye Study: rationale, methods and a cross-sectional analysis of visual impairment in a population-based cohort. <i>BMJ Open</i> . 2013; 3(3).                                                                                                                          | 2004-2011            | * |
| World Health Organization (WHO). WHO Global Health Observatory - Cholera: Number of Reported Cases by Country. Geneva, Switzerland: World Health Organization (WHO).                                                                                                                                                                                                                                                           | 2000-2012            | * |
| Wagner KS, White JM, Crowcroft NS, De Martin S, Mann G, Efstratiou A. Diphtheria in the United Kingdom, 1986-2008: the increasing role of <i>Corynebacterium ulcerans</i> . <i>Epidemiol Infect</i> . 2010; 138(11): 1519-30.                                                                                                                                                                                                  | 1986-2008            |   |
| National Centre for Social Research and National Foundation for Educational Research, Smoking, Drinking and Drug Use among Young People, 2012 [computer file]. Colchester, Essex: UK Data Archive [distributor], October 2013. SN: 7393, <a href="http://dx.doi.org/10.5255/UKDA-SN-7393-1">http://dx.doi.org/10.5255/UKDA-SN-7393-1</a>                                                                                       | 2012                 | * |
| Fogarty AW, Lewis SA, McKeever TM, Britton JR. Is higher sodium intake associated with elevated systemic inflammation? A population-based study. <i>Am J Clin Nutr</i> . 2009; 89(6): 1901-4. as it appears in Global Dietary Database Consortium, Nutrition and Chronic Disease Expert Group (NutriCoDE) Global Dietary Database 1980-2011. [Unpublished].                                                                    | 1991                 |   |
| Khaw K-T, Bingham S, Welch A, Luben R, O'Brien E, Wareham N, Day N. Blood pressure and urinary sodium in men and women: the Norfolk Cohort of the European Prospective Investigation into Cancer (EPIC-Norfolk). <i>Am J Clin Nutr</i> . 2004; 80(5): 1397-403. as it appears in Global Dietary Database Consortium, Nutrition and Chronic Disease Expert Group (NutriCoDE). Global Dietary Database 1980-2011. [Unpublished]. | 1993-1997            |   |
| Garraway WM, Russell EB, Lee RJ, Collins GN, McKelvie GB, Hehir M, Rogers AC, Simpson RJ. Impact of previously unrecognized benign prostatic hyperplasia on the daily activities of middle-aged and elderly men. <i>Br J Gen Pract</i> . 1993; 43(373): 318-21.                                                                                                                                                                | 1990                 |   |
| Ng Y, Shaw D, Fielder A, Levene M. Epidemiology of retinopathy of prematurity. <i>Lancet</i> . 1988; 332(8622): 1235-7.                                                                                                                                                                                                                                                                                                        | 1986                 | * |
| Fortnum HM, Davis AC. Epidemiology of bacterial meningitis. <i>Arch Dis Child</i> . 1993; 68(6): 763-7.                                                                                                                                                                                                                                                                                                                        | 1980-1989            |   |
| Holt D, Halket S, de Louvois J, Harvey D. Neonatal meningitis in England and Wales: 10 years on. <i>Arch Dis Child Fetal Neonatal Ed</i> . 2001; 84(2): F8-F89.                                                                                                                                                                                                                                                                | 1996-1997            |   |
| De Louvois J, Blackburn J, Hurley R, Harvey D. Infantile meningitis in England and Wales: a two year study. <i>Arch Dis Child</i> . 1991; 66(5): 603-7.                                                                                                                                                                                                                                                                        | 1985-1987            |   |
| Department of Health (United Kingdom), Office of Population Censuses and Surveys (United Kingdom), Royal College of General Practitioners. Morbidity Statistics from General Practice: Fourth National Study 1991-1992. London, United Kingdom: Her Majesty's Stationery Office (HMSO), 1995.                                                                                                                                  | 1991-1992            |   |
| Gauthier A, Breuer J, Carrington D, Martin M, Rémy V. Epidemiology and cost of herpes zoster and post-herpetic neuralgia in the United Kingdom. <i>Epidemiol Infect</i> . 2009; 137(1): 38-47.                                                                                                                                                                                                                                 | 2000-2006            |   |
| Fleming DM, Cross KW, Cobb WA, Chapman RS. Gender difference in the incidence of shingles. <i>Epidemiol Infect</i> . 2004; 132(1): 1-5.                                                                                                                                                                                                                                                                                        | 1994-2001            |   |
| Hope-Simpson RE. The Nature of Herpes Zoster: A Long-term Study and a New Hypothesis. <i>Proc R Soc Med</i> . 1965; 58(1): 9-20.                                                                                                                                                                                                                                                                                               | 1950-1962            |   |
| Glynn C, Crockford G, Gavaghan D, Cardno P, Price D, Miller J. Epidemiology of Shingles. <i>J R Soc Med</i> . 1990; 83(10): 617-9.                                                                                                                                                                                                                                                                                             | 1978-1986            |   |
| Ross CAC, Brown WK, Clarke A, Caldwell WF, Gordon ER, Harvey J, McAlister AMT, McGlone J, Prentice RTW, Thorburn W, Tobias C. Herpes zoster in general practice. <i>J R Coll Gen Pract</i> . 1975; 25(150): 29-32.                                                                                                                                                                                                             | 1972-1973            |   |
| Fairley CK, Miller E. Varicella-zoster virus epidemiology – A changing scene? <i>J Infect Dis</i> . 1996; 174(Suppl 3): S314-15.                                                                                                                                                                                                                                                                                               | 1980-1989            |   |
| Wilson JB. Thirty one years of herpes zoster in a rural practice. <i>Br Med J (Clin Res Ed)</i> . 1986; 293(6558): 1349-51.                                                                                                                                                                                                                                                                                                    | 1955-1985            |   |
| Cunningham R, Mutton K. Dengue haemorrhagic fever. <i>BMJ</i> . 1991; 302(6784): 1083-4.                                                                                                                                                                                                                                                                                                                                       | 1990                 |   |
| European Community Respiratory Health Survey Study Group. European Community Respiratory Health Survey 1992-2003 as provided by the Global Burden of Disease 2010 Respiratory Disease Expert Group. [Unpublished].                                                                                                                                                                                                             | 1992-1994, 1998-2003 |   |
| Global Allergy and Asthma European Network (GA*LEN). Global Allergy and Asthma European Network Collaboration Center Data 2007-2008 as provided by the Global Burden of Disease 2010 Respiratory Disease Expert Group. [Unpublished].                                                                                                                                                                                          | 2008                 |   |
| United Kingdom - England UK Renal Registry (UKRR) Renal Replacement Therapy Data 2010 as it appears in European Renal Association-European Dialysis and Transplant Association (ERA-EDTA). European Renal Association-European Dialysis and Transplant Association Registry Annual Report 2010. Parma, Italy: European Renal Association-European Dialysis and Transplant Association (ERA-EDTA), 2012.                        | 2010                 |   |
| United Kingdom - England UK Renal Registry (UKRR) Renal Replacement Therapy Data 2011 as it appears in European Renal Association-European Dialysis and Transplant Association (ERA-EDTA). European Renal Association-European Dialysis and Transplant Association Registry Annual Report 2011. Parma, Italy: European Renal Association-European Dialysis and Transplant Association (ERA-EDTA), 2013.                        | 2011                 |   |
| Davison KL, Crowcroft NS, Ramsay ME, Brown DWG, Andrews NJ. Viral encephalitis in England, 1989-1998: what did we miss? <i>Emerg Infect Dis</i> . 2003; 9(2): 234-40.                                                                                                                                                                                                                                                          | 1989-1998            |   |
| Cohn M, Stewart P. Prevalence of potential pathogens in cervical canal before termination of pregnancy. <i>BMJ</i> . 1992; 304(6840): 1479.                                                                                                                                                                                                                                                                                    | 1992                 |   |
| Wright D, Barrow S, Fisher AD, Horsley SD, Jayson MI. Influence of physical, psychological and behavioural factors on consultations for back pain. <i>J Rheumatol</i> . 1995; 34(2): 156-61.                                                                                                                                                                                                                                   | 1992                 | * |
| World Health Organization (WHO). Mental Illness in General Health Care: An International Study. Geneva, Switzerland: World Health Organization (WHO), 1995.                                                                                                                                                                                                                                                                    | 1991-1992            |   |
| Kendall RE, Staton MC. The fate of untreated alcoholics. <i>Q J Stud Alcohol</i> . 1966; 27(1): 30-41.                                                                                                                                                                                                                                                                                                                         | 1950-1970            |   |
| Adelstein A, White G. Alcoholism and mortality. <i>Popul Trends</i> . 1976; 6: 13-14.                                                                                                                                                                                                                                                                                                                                          | 1953-1974            |   |
| Marshall EJ, Edwards G, Taylor C. Mortality in men with drinking problems: a 20-year follow-up. <i>Addiction</i> . 1994; 89(10): 1293-8.                                                                                                                                                                                                                                                                                       | 1968-1990            |   |
| Plant M. Women, Drinking, and Pregnancy. London, United Kingdom: Tavistock Publications, 198                                                                                                                                                                                                                                                                                                                                   | 1980-1996, 1998-2008 | * |
| Van Veldhuisen DJ, Dickstein K, Cohen-Solal A, Lok DJA, Wasserman SM, Baker N, Rosser D, Cleland JGF, Ponikowski P. Randomized, double-blind, placebo-controlled study to evaluate the effect of two dosing regimens of darbepoetin alfa in patients with heart failure and anaemia. <i>Eur Heart J</i> . 2007; 28(18): 2208-16.                                                                                               | 1992-1995            |   |
| EUVAC-NET. EUVAC-NET Pertussis Surveillance Report 2008. Stockholm, Sweden: European Centre for Disease Prevention and Control, 2009.                                                                                                                                                                                                                                                                                          | 2008                 |   |
| EUVAC-NET. EUVAC-NET Pertussis Surveillance Report 2003-2007. Stockholm, Sweden: European Centre for Disease Prevention and Control 2009.                                                                                                                                                                                                                                                                                      | 2003-2007            |   |
| EUVAC-NET. EUVAC-NET Pertussis Surveillance Report 2009. Stockholm, Sweden: European Centre for Disease Prevention and Control, 2010.                                                                                                                                                                                                                                                                                          | 2009                 |   |
| United Nations Statistics Division (UNSD). United Nations Demographic Yearbook - Historical Supplement 1997. New York City, United States United Nations Statistics Division (UNSD).                                                                                                                                                                                                                                           | 1990                 |   |
| Margolis DJ, Bilker W, Knauss J, Baumgarten M, Strom BL. The incidence and prevalence of pressure ulcers among elderly patients in general medical practice. <i>Ann Epidemiol</i> . 2002; 12(5): 321-5.                                                                                                                                                                                                                        | 1988-1996            | * |
| Flohr C, Weiland SK, Weinmayr G, Björkstén B, Bråbäck L, Brunekreef B, Büchele G, Clausen M, Cookson WOC, von Mutius E, Strachan DP, Williams HC, ISAAC Phase Two Study Group. The role of atopic sensitization in flexural eczema: findings from the International Study of Asthma and Allergies in Childhood Phase Two. <i>J Allergy Clin Immunol</i> . 2008; 121(1): 141-147.                                               | 2005-2007            | * |
| Gelfand JM, Weinstein R, Porter SB, Neimann AL, Berlin JA, Margolis DJ. Prevalence and treatment of psoriasis in the United Kingdom: a population-based study. <i>Arch Dermatol</i> . 2005; 141(12): 1537-41.                                                                                                                                                                                                                  | 1987-2002            | * |
| EUVAC-NET. EUVAC-NET Measles Surveillance Report 2010. Stockholm, Sweden: European Centre for Disease Prevention and Control, 2011.                                                                                                                                                                                                                                                                                            | 2010                 |   |
| World Health Organization (WHO). Measles surveillance in 1989. <i>Wkly Epidemiol Rec</i> . 1990; 65(15): 112-3.                                                                                                                                                                                                                                                                                                                | 1989                 | * |
| EUVAC-NET. EUVAC-NET Measles Surveillance Report 2007. Stockholm, Sweden: European Centre for Disease Prevention and Control, 2008.                                                                                                                                                                                                                                                                                            | 2007                 |   |
| EUVAC-NET. EUVAC-NET Measles Surveillance Report 2005. Stockholm, Sweden: European Centre for Disease Prevention and Control, 2006.                                                                                                                                                                                                                                                                                            | 2005                 |   |
| EUVAC-NET. EUVAC-NET Measles Surveillance Report 2006. Stockholm, Sweden: European Centre for Disease Prevention and Control, 2007.                                                                                                                                                                                                                                                                                            | 2006                 |   |
| EUVAC-NET. EUVAC-NET Measles Surveillance Report 2008. Stockholm, Sweden: European Centre for Disease Prevention and Control, 2009.                                                                                                                                                                                                                                                                                            | 2008                 |   |

|                                                                                                                                                                                                                                                                                                                                                                                                                                                                                                                                                                                                                                                                                                                       |                  |   |
|-----------------------------------------------------------------------------------------------------------------------------------------------------------------------------------------------------------------------------------------------------------------------------------------------------------------------------------------------------------------------------------------------------------------------------------------------------------------------------------------------------------------------------------------------------------------------------------------------------------------------------------------------------------------------------------------------------------------------|------------------|---|
| World Health Organization (WHO). Expanded programme on immunization. Measles outbreak. Wkly Epidemiol Rec. 1990; 65(49): 379-81.                                                                                                                                                                                                                                                                                                                                                                                                                                                                                                                                                                                      | 1988             | * |
| WHO Regional Office for Europe (EURO-WHO). Social Determinants of Health and Well-being Among Young People: Health Behaviour in School-aged Children (HBSC) Study: International Report from the 2009/2010 Survey. Copenhagen, Denmark: WHO Regional Office for Europe (EURO-WHO), 2012.                                                                                                                                                                                                                                                                                                                                                                                                                              | 2009             | * |
| Mathers BM, Degenhardt L, Phillips B, Wiessing L, Hickman M, Strathdee SA, Wodak A, Panda S, Tyndall M, Toufik A, Mattick RP. Global epidemiology of injecting drug use and HIV among people who inject drugs: a systematic review. Lancet. 2008; 372: 1733-1745.                                                                                                                                                                                                                                                                                                                                                                                                                                                     | 2007             | * |
| Henhorn J, Anionwu E, Brozovic M. Screening cord blood for sickle haemoglobinopathies in Brent. Br Med J (Clin Res Ed). 1984; 289(6443): 478-80.                                                                                                                                                                                                                                                                                                                                                                                                                                                                                                                                                                      | 1981-1983        | * |
| McCarthy HD, Jarrett KV, Emmett PM, Rogers I. Trends in waist circumferences in young British children: a comparative study. Int J Obes (Lond). 2005; 29(2): 157-62.                                                                                                                                                                                                                                                                                                                                                                                                                                                                                                                                                  | 1995             |   |
| Jebb SA, Rennie KL, Cole TJ. Prevalence of overweight and obesity among young people in Great Britain. Public Health Nutr. 2004; 7(3): 461-5.                                                                                                                                                                                                                                                                                                                                                                                                                                                                                                                                                                         | 1997             |   |
| Wardle J, Williamson S, Johnson F, Edwards C. Depression in adolescent obesity: cultural moderators of the association between obesity and depressive symptoms. Int J Obes (Lond). 2006; 30(4): 634-43.                                                                                                                                                                                                                                                                                                                                                                                                                                                                                                               | 1999             |   |
| Fisher L, Fraser J, Alexander C. Caregivers' inability to identify childhood adiposity: a cross-sectional survey of rural children and their caregiver attitudes. Aust J Rural Health. 2006; 14(2): 56-61.                                                                                                                                                                                                                                                                                                                                                                                                                                                                                                            | 2002             |   |
| Steele RM, van Sluijs EMF, Cassidy A, Griffin SJ, Ekelund U. Targeting sedentary time or moderate- and vigorous-intensity activity: independent relations with adiposity in a population-based sample of 10-y-old British children. Am J Clin Nutr. 2009; 90(5): 1185-92.                                                                                                                                                                                                                                                                                                                                                                                                                                             | 2007             |   |
| Sanderoock GRH, Ogunleye A, Voss C. Comparison of cardiorespiratory fitness and body mass index between rural and urban youth: findings from the East of England Healthy Hearts Study. Pediatr Int. 2011; 53(5): 718-24.                                                                                                                                                                                                                                                                                                                                                                                                                                                                                              | 2007             |   |
| Ottova V, Erhart M, Rajmil L, Dettenborn-Betz L, Ravens-Sieberer U. Overweight and its impact on the health-related quality of life in children and adolescents: results from the European KIDSCREEN survey. Qual Life Res. 2012; 21(1): 59-69.                                                                                                                                                                                                                                                                                                                                                                                                                                                                       | 2003             |   |
| Buchan IE, Bundred PE, Kitchiner DJ, Cole TJ. Body mass index has risen more steeply in tall than in short 3-year olds: serial cross-sectional survey 1988-2003. Int J Obes (Lond). 2007; 31(1): 23-9.                                                                                                                                                                                                                                                                                                                                                                                                                                                                                                                | 1988-2003        |   |
| Loflahl HE, Lane A, Lu Y, Lagergren P, Harvey RF, Blazey JM, Lagergren J. Increased population prevalence of reflux and obesity in the United Kingdom compared with Sweden: a potential explanation for the difference in incidence of esophageal adenocarcinoma. Eur J Gastroenterol Hepatol. 2011; 23(2): 128-32.                                                                                                                                                                                                                                                                                                                                                                                                   | 1996             |   |
| Mitchell RT, McDougall CM, Crum JE. Decreasing prevalence of obesity in primary schoolchildren. Arch Dis Child. 2007; 92(2): 153-4.                                                                                                                                                                                                                                                                                                                                                                                                                                                                                                                                                                                   | 2004             |   |
| Shiue I. Associated social factors of body mass index in adults and the very old in the UK. Int J Cardiol. 2013; 168(1): 543-4.                                                                                                                                                                                                                                                                                                                                                                                                                                                                                                                                                                                       | 2009             |   |
| ISSP Research Group (2013). International Social Survey Programme: Health and Health Care - ISSP 2011. GESIS Data Archive, Cologne. ZA5800 Data file version 2.0.0. doi:10.4232/1/11759.                                                                                                                                                                                                                                                                                                                                                                                                                                                                                                                              | 2011             | * |
| Ahmed ML, Allen AD, Dunger DB, Macfarlane A. The Oxford growth study: a district growth surveillance programme 1988-1994. J Med Screen. 1995; 2(3): 160-3. as it appears in World Health Organization (WHO). WHO Global Database on Child Growth and Malnutrition - Historical.                                                                                                                                                                                                                                                                                                                                                                                                                                       | 1988-1994        |   |
| Trichopoulos D, Bamia C, Ligiou P, Fedirko V, Trepo E, Jenab M, Pischon T, Nöthlings U, Overvad K, Tjønneland A, Outzen M, Clavel-Chapelon F, Kaaks R, Lukanova A, Boeing H, Aleksandrova K, Benetou V, Zylis D, Palli D, Pala V, Panico S, Tumino R, Sacerdote C, Bueno-De-Mesquita HB, Van Kranen HJ, Peeters PHM, Lund E, Quiros JR, González CA, Sanchez Perez M-J, Navarro C, Dorronsoro M, Barricarte A, Lindkvist B, Regnér S, Werner M, Hallmans G, Khaw K-T, Wareham N, Key T, Romieu I, Chuang S-C, Murphy N, Boffetta P, Trichopoulou A, Riboli E. Hepatocellular carcinoma risk factors and disease burden in a European cohort: a nested case-control study. J Natl Cancer Inst. 2011; 103(22): 1686-95. | 1992-2006        |   |
| Fowkes FG, Leng GC, Donnan PT, Deary IJ, Riemersma RA, Housley E. Serum cholesterol, triglycerides, and aggression in the general population. Lancet. 1992; 340(8826): 995-8.                                                                                                                                                                                                                                                                                                                                                                                                                                                                                                                                         | 1987             |   |
| Forrest RD, Jackson CA, Yudkin JS. Glucose intolerance and hypertension in north London: the Islington Diabetes Survey. Diabet Med. 1986; 3(4): 343-50.                                                                                                                                                                                                                                                                                                                                                                                                                                                                                                                                                               | 1984-1985        |   |
| Cattaneo A. Breastfeeding in Europe: a blueprint for action. J Public Health. 2005; 13(2): 89-96.                                                                                                                                                                                                                                                                                                                                                                                                                                                                                                                                                                                                                     | 2000             |   |
| Kelly YJ, Watt RG. Breast-feeding initiation and exclusive duration at 6 months by social class--results from the Millennium Cohort Study. Pub Health Nutr. 2005; 8(4): 417-21.                                                                                                                                                                                                                                                                                                                                                                                                                                                                                                                                       | 2001             |   |
| Department of Health (United Kingdom), Health Protection Agency (United Kingdom), Joint United Nations Program on HIV/AIDS (UNAIDS). United Kingdom UNGASS Country Progress Report 2010. Geneva, Switzerland: Joint United Nations Program on HIV/AIDS (UNAIDS), 2010.                                                                                                                                                                                                                                                                                                                                                                                                                                                | 2009             |   |
| Gay NJ, Morgan-Capner P, Wright J, Farrington CP, Miller E. Age-specific antibody prevalence to hepatitis A in England: implications for disease control. Epidemiol Infect. 1994; 113(1): 113-20.                                                                                                                                                                                                                                                                                                                                                                                                                                                                                                                     | 1986-1987        |   |
| Masterton RG, Strike PW, Tettmar RE. Hepatitis A immunity and travel history. J Infect. 1991; 23(3): 321-4.                                                                                                                                                                                                                                                                                                                                                                                                                                                                                                                                                                                                           | 1987-1988        | * |
| Scott NJ, Harrison JF, Zuckerman AJ. Hepatitis A antibody in blood donors in North East Thames region: implications to prevention policies. Epidemiol Infect. 1989; 103(2): 377-82.                                                                                                                                                                                                                                                                                                                                                                                                                                                                                                                                   | 1988             |   |
| Bernal W, Smith H, Williams R. A Community Prevalence of Antibodies to Hepatitis A and E in Inner-City London. J Med Virol. 1996; 230-4.                                                                                                                                                                                                                                                                                                                                                                                                                                                                                                                                                                              | 1988-1989        |   |
| Cumberland NS, Masterton RG, Green AD, Sims MM. Prevalence of immunity to hepatitis A in recruits to the British Army and Royal Air Force. J Army Med Corps. 1994; 140(2): 71-5.                                                                                                                                                                                                                                                                                                                                                                                                                                                                                                                                      | 1989-1992        |   |
| Zuckerman JN, Powell L. Hepatitis A antibodies in attenders of London travel clinics: Cost-benefit of screening prior to hepatitis A immunisation. Med Virol. 1994; 44(4): 393-4.                                                                                                                                                                                                                                                                                                                                                                                                                                                                                                                                     | 1991-1993        |   |
| Morris MC, Gay NJ, Hesketh LM, Morgan-Capner P, Miller E. The changing epidemiological pattern of hepatitis A in England and Wales. Epidemiol Infect. 2002; 128(3): 457-63.                                                                                                                                                                                                                                                                                                                                                                                                                                                                                                                                           | 1996             |   |
| Ross JDC, Ghanem M, Tariq A, Gilleran G, Winter AJ. Seroprevalence of hepatitis A immunity in male genitourinary medicine clinic attenders: a case control study of heterosexual and homosexual men. Sex Transm Infect. 2002; 78(3): 174-9.                                                                                                                                                                                                                                                                                                                                                                                                                                                                           | 2000             |   |
| Morris-Cunnington MC, Edmunds WJ, Miller E, Brown DWG. A population-based seroprevalence study of hepatitis A virus using oral fluid in England and Wales. Am J Epidemiol. 2004; 159(8): 786-94.                                                                                                                                                                                                                                                                                                                                                                                                                                                                                                                      | 2001-2003        |   |
| Jarvis D, Luczynska C, Chinn S, Burney P. The association of hepatitis A and Helicobacter pylori with sensitization to common allergens, asthma and hay fever in a population of young British adults. Allergy. 2004; 59(10): 1063-7.                                                                                                                                                                                                                                                                                                                                                                                                                                                                                 | 2003             |   |
| Dalton HR, Stableforth W, Hazeldine S, Thuraiajah P, Ramnarace R, Warshaw U, Ijaz S, Ellis V, Bendall R. Autochthonous hepatitis E in South West England: a comparison with hepatitis A. Eur J Clin Microbiol Infect Dis. 2008; 27(7): 579-85.                                                                                                                                                                                                                                                                                                                                                                                                                                                                        | 2005-2006        |   |
| Bates CJ, Mansoor MA, Pentieva KD, Hamer M, Mishra GD. Biochemical risk indices, including plasma homocysteine, that prospectively predict mortality in older British people: the National Diet and Nutrition Survey of People Aged 65 Years and Over. Br J Nutr. 2010; 104(6): 893-9.                                                                                                                                                                                                                                                                                                                                                                                                                                | 1994-1995        | * |
| Tunstall-Pedoe H, Kuulasmaa K, Mähönen M, Tolonen H, Ruokokoski E. Contribution of trends in survival and coronary-event rates to changes in coronary heart disease mortality: 10-year results from 37 WHO MONICA Project populations. Lancet. 1999; 353(9164): 1547-57.                                                                                                                                                                                                                                                                                                                                                                                                                                              | 1980-1995        |   |
| Abusheikha N, Akagbosu F, Marcus S, Lass A, Cousins C, Brinsden P. Viral screening and assisted conception treatment--the Bourn Hall experience. Assist Reprod Genet. 1999; 16(6): 337-9.                                                                                                                                                                                                                                                                                                                                                                                                                                                                                                                             | 1987-1998        |   |
| Anderson SR, Righarts A, Maguire H. Surveillance of antenatal infections--HIV, hepatitis B, syphilis and rubella susceptibility in London. Commun Dis Public Health. 2004; 7(4): 251-7.                                                                                                                                                                                                                                                                                                                                                                                                                                                                                                                               | 2002             |   |
| Balogun MA, Ramsay ME, Hesketh LM, Andrews N, Osborne KP, Gay NJ, Morgan-Capner P. The prevalence of hepatitis C in England and Wales. Infect. 2002; 45(4): 219-26.                                                                                                                                                                                                                                                                                                                                                                                                                                                                                                                                                   | 1986, 1991, 1996 |   |
| Bracebridge S, Irwin D, Millership S. Prevention of perinatal hepatitis B transmission in a health authority area: an audit. Commun Dis Public Health. 2004; 7(2): 138-41.                                                                                                                                                                                                                                                                                                                                                                                                                                                                                                                                            | 1996-2002        |   |
| Brant LJ, Hurrelle M, Balogun MA, Klapper P, Ahmad F, Boxall E, Hale A, Hollyoak V, Ibrahim IB, Irving W, Meigh R, Mutton KJ, Patel BC, Pavey WK, Pugh S, Taylor C, Turner AJ, Ramsay ME. Sentinel laboratory surveillance of hepatitis C antibody testing in England: understanding the epidemiology of HCV infection. Epidemiol Infect. 2007; 135(3): 417-26.                                                                                                                                                                                                                                                                                                                                                       | 2002-2003        |   |
| Christie I, Sumner D, Palmer S, Kenney A, Banatvala J. Screening of pregnant women for evidence of current hepatitis B infection: selective universal? Health Trends. 1992; 24(1): 13-5.                                                                                                                                                                                                                                                                                                                                                                                                                                                                                                                              | 1988-1990        |   |
| Cunningham R, Northwood JL, Kelly CD, Boxall EH, Andrews NJ. Routine antenatal screening for hepatitis B using pooled sera: validation and review of 10 years experience. J Clin Pathol. 1998; 51(5): 392-5.                                                                                                                                                                                                                                                                                                                                                                                                                                                                                                          | 1986-1996        |   |
| Gay NJ, Hesketh LM, Osborne KP, Farrington CP, Morgan-Capner P, Miller E. The prevalence of hepatitis B infection in adults in England and Wales. Epidemiol Infect. 1999; 122(1): 133-8.                                                                                                                                                                                                                                                                                                                                                                                                                                                                                                                              | 1996             |   |
| Gore SM, Brette RP, Burns SM, Lewis SC. Pilot study to estimate survivors to 1995 of 1983-1984 prevalent hepatitis C infections in Lothian patients who tested positive or negative for hepatitis B surface antigen in 1983-1984. J Infect. 1998; 37(2): 159-65.                                                                                                                                                                                                                                                                                                                                                                                                                                                      | 1983-1984        |   |
| Ijaz S, Vyse AJ, Morgan D, Pebody RG, Tedder RS, Brown D. Indigenous hepatitis E virus infection in England: more common than it seems. J Clin Virol. 2009; 44(4): 272-6.                                                                                                                                                                                                                                                                                                                                                                                                                                                                                                                                             | 1991, 2004       |   |



|                                                                                                                                                                                                                                                                                                                                                                                                                                                                                                                                                                       |                             |   |
|-----------------------------------------------------------------------------------------------------------------------------------------------------------------------------------------------------------------------------------------------------------------------------------------------------------------------------------------------------------------------------------------------------------------------------------------------------------------------------------------------------------------------------------------------------------------------|-----------------------------|---|
| MacLean AB, Cameron S, Follett EAC. Prevalence of hepatitis B and C viruses and human immunodeficiency virus infections in women reproductive age. <i>Br J Obstet Gynaecol.</i> 1993; 100(7): 702-3.                                                                                                                                                                                                                                                                                                                                                                  | 1991, 1993                  |   |
| Sturrock CJ, Currie MJ, Vally H, O'Keefe EJ, Primrose R, Habel P, Schamburg K, Bowden FJ. Community-based sexual health care works: a review of the ACT outreach program. <i>Sex Health.</i> 2007; 4(3): 201-4.                                                                                                                                                                                                                                                                                                                                                       | 2002-2005                   |   |
| Castillo Taucher S. [Services for the care and prevention of birth defects. Reduced report of a World Health Organization and March of Dims Foundation meeting]. <i>Rev Med Chil.</i> 2007; 135(6): 806-13.                                                                                                                                                                                                                                                                                                                                                           | 1955-2000                   |   |
| Curtis V. Hand Washing at the London School of Hygiene and Tropical Medicine (LSHTM): The Shocking Truth. 200                                                                                                                                                                                                                                                                                                                                                                                                                                                         | 2004                        | * |
| Giraudo I, Forde J, Maguire H, Arnold J, Permalloo N. Antenatal screening and prevalence of infection: surveillance in London, 2000-2007. <i>Eur Surveill.</i> 2009; 14(9): 8-12.                                                                                                                                                                                                                                                                                                                                                                                     | 2000-2007                   |   |
| Gunby JA, Darby SC, Miles JC, Green BM, Cox DR. Factors affecting indoor radon concentrations in the United Kingdom. <i>Health Phys.</i> 1993; 64(1): 12.                                                                                                                                                                                                                                                                                                                                                                                                             | 2005                        |   |
| Curtis V, Biran A, Deverell K, Hughes C, Bellamy K, Drasar B. Hygiene in the home: relating bugs and behaviour. <i>Soc Sci Med.</i> 2003; 57(4): 657-72.                                                                                                                                                                                                                                                                                                                                                                                                              | 2003                        | * |
| Judah G, Aunger R, Schmidt WP, Michie S, Granger S, Curtis V. Experimental pretesting of hand-washing interventions in a natural setting. <i>Am Public Health.</i> 2009; 99(Suppl 2): S405-11.                                                                                                                                                                                                                                                                                                                                                                        | 2009                        | * |
| Hull MG, Glazener CM, Kelly NJ, Conway DI, Foster PA, Hinton RA, Coulson C, Lambert PA, Watt EM, Desai KM. Population study of cause, treatment, and outcome of infertility. <i>Br Med J (Clin Res Ed).</i> 1985; 291(6510): 1693-7.                                                                                                                                                                                                                                                                                                                                  | 1982-1983                   | * |
| Flohr C, Weinmayr G, Weiland SK, Addo-Yobo E, Annesi-Maesano I, Björkstén B, Bråbäck L, Büchele G, Chico M, Cooper P, Clausen M, El Sharif N, Martinez Gimeno A, Mathur RS, von Mutius E, Morales Suarez-Varela M, Pearce N, Svabe V, Wong GWK, Yu M, Zhong NS, Williams HC, ISAAC Phase Two Study Group. How well do questionnaires perform compared with physical examination in detecting flexural eczema? Findings from the International Study of Asthma and Allergies in Childhood (ISAAC) Phase Two. <i>Br J Dermatol.</i> 2009; 161(4): 846-53.               | 2005-2007                   | * |
| Stamler J, Elliott P, Chan Q. INTERMAP Appendix Tables. <i>J Hum Hypertens.</i> 2003; 17: 665-775. as it appears in Global Dietary Database Consortium, Nutrition and Chronic Disease Expert Group (NutriCoDE). Global Dietary Database 1980-2011. [Unpublished].                                                                                                                                                                                                                                                                                                     | 1997-1998                   |   |
| United Kingdom Dietary Sodium 24 Hour Urine Sample Survey 2008 as it appears in Global Dietary Database Consortium, Nutrition and Chronic Disease Expert Group (NutriCoDE). Global Dietary Database 1980-2011. [Unpublished].                                                                                                                                                                                                                                                                                                                                         | 2008                        |   |
| Muir MS, Brayne C. A longitudinal study in progress: a five-year follow-up of women aged 70-79 years living in a rural community. <i>Neuroepidemiology.</i> 1992; 11(Suppl 1): 67-70.                                                                                                                                                                                                                                                                                                                                                                                 | 1982-1985                   |   |
| Kettil Bruun Society for Social and Epidemiological Research on Alcohol, University of North Dakota, Aarhus University, Alcohol Research Group/Public Health Institute, Centre for Addiction and Mental Health, University of Melbourne, Swiss Institute for the Prevention of Alcohol and Drug Problems, Gender, Alcohol, and Culture: an International Study (GENACIS) Childhood Sexual Abuse and Intimate Partner Violence Data as provided by the Global Burden of Disease 2010 Childhood Sexual Abuse and Intimate Partner Violence Expert Group. [Unpublished]. | 2000, 2002, 2005            |   |
| Home Office (United Kingdom). Domestic Violence: Findings From a New British Crime Survey Self-completion Questionnaire. London, United Kingdom: Home Office (United Kingdom), 1999.                                                                                                                                                                                                                                                                                                                                                                                  | 1996                        |   |
| Kennedy CR, Kimm L, Cafarelli Dees D. Controlled trial of universal neonatal screening for early identification of permanent childhood hearing impairment. <i>Lancet.</i> 1998; 352(9145): 1957-64.                                                                                                                                                                                                                                                                                                                                                                   | 1993-1996                   | * |
| Surman G, Newdick H, King A, Gallagher M, Kurinczuk JJ. 4Child: Four Counties Database of Cerebral Palsy, Vision Loss and Hearing Loss in Children. Annual Report 2009, including data for births 1984 to 2003. Oxford, United Kingdom: National Perinatal Epidemiology Unit, 2009.                                                                                                                                                                                                                                                                                   | 1984-2003                   |   |
| Watkin P, Baldwin M. The longitudinal follow up of a universal neonatal hearing screen: the implications for confirming deafness in childhood. <i>Ir Audiol.</i> 2012; 51(7): 519-28.                                                                                                                                                                                                                                                                                                                                                                                 | 1992-2002                   | * |
| Wang Y, Rudd AG, Wolfe CD. Age and ethnic disparities in incidence of stroke over time: the South London Stroke Register. <i>Stroke.</i> 2013; 44(12): 3298-304. [Unpublished data].                                                                                                                                                                                                                                                                                                                                                                                  | 1995-2010                   | * |
| Markowe HL, Bulpitt CJ, Shipley MJ, Rose G, Crombie DL, Fleming DM. Prognosis in adult asthma: a national study. <i>Br Med J (Clin Res Ed).</i> 1982; 295(6604): 949-52.                                                                                                                                                                                                                                                                                                                                                                                              | 1970-1976                   | * |
| Fine PE, Clarkson JA. Distribution of immunity to pertussis in the population of England and Wales. <i>J Hyg (Lond).</i> 1984; 92(1): 21-36.                                                                                                                                                                                                                                                                                                                                                                                                                          | 1950-1981                   |   |
| Peace Research Institute Oslo (PRIO). Battle Deaths Dataset Version 3, 2009. Oslo, Norway: Peace Research Institute Oslo (PRIO), 2009.                                                                                                                                                                                                                                                                                                                                                                                                                                | 1971-1988                   |   |
| United Kingdom Dementia Data 1988-1991 from literature review, as provided by the Global Burden of Disease 2010 Dementia Expert Group [Unpublished].                                                                                                                                                                                                                                                                                                                                                                                                                  | 1988-1991                   |   |
| Williams DR, Bingham SA. Sodium and potassium intakes in a representative population sample: estimation from 24 h urine collections known to be complete in a Cambridgeshire village. <i>Br J Nutr.</i> 1986; 55(1): 13-22. as it appears in Global Dietary Database Consortium, Nutrition and Chronic Disease Expert Group (NutriCoDE). Global Dietary Database 1980-2011. [Unpublished].                                                                                                                                                                            | 1985                        |   |
| European Surveillance of Congenital Anomalies (EUROCAT), Netherlands Organisation for Applied Scientific Research (TNO), Surveillance of Cerebral Palsy in Europe (SCPE). European Perinatal Health Report 2008.                                                                                                                                                                                                                                                                                                                                                      | 2004                        |   |
| Confidential Enquiry into Maternal and Child Health (CEMACH). Perinatal Mortality 2005: England, Wales and Northern Ireland. London, United Kingdom: Confidential Enquiry into Maternal and Child Health (CEMACH), 2007.                                                                                                                                                                                                                                                                                                                                              | 2005                        |   |
| Jones RA, Cummins M, Davies PA. Infants of very low birthweight. A 15-year analysis. <i>Lancet.</i> 1979; 1(8130): 1332-.                                                                                                                                                                                                                                                                                                                                                                                                                                             | 1963                        |   |
| Pharoah PO, Alberman ED. Mortality of low birthweight infants in England and Wales 1953 to 1979. <i>Arch Dis Child.</i> 1981; 56(2): 86-9.                                                                                                                                                                                                                                                                                                                                                                                                                            | 1965, 1971, 1974, 1977-1978 |   |
| Brown ER, Tausch HW. Intensive care and the very low birthweight infant. <i>Lancet.</i> 1979; 2(8138): 362-.                                                                                                                                                                                                                                                                                                                                                                                                                                                          | 1973                        |   |
| Tin W, Wariyar U, Hey E. Changing prognosis for babies of less than 28 weeks' gestation in the north of England between 1983 and 1994. Northern Neonatal Network. <i>BMJ.</i> 1997; 314(7074): 107-11.                                                                                                                                                                                                                                                                                                                                                                | 1988, 1992                  |   |
| Cartledge PH, Stewart JH. Survival of very low birthweight and very preterm infants in a geographically defined population. <i>Acta Paediatr.</i> 1997; 86(1): 105-10.                                                                                                                                                                                                                                                                                                                                                                                                | 1993                        |   |
| Wariyar U, Richmond S, Hey E. Pregnancy outcome at 24-31 weeks' gestation: neonatal survivors. <i>Arch Dis Child.</i> 1989; 64(5): 678-86.                                                                                                                                                                                                                                                                                                                                                                                                                            | 1983                        |   |
| Lumley J, Kitchen WH, Roy RN, Yu VY, Drew JH. The survival of extremely-low-birthweight infants in Victoria: 1982-1985. <i>Med J Aust.</i> 1987; 149(5): 242-6.                                                                                                                                                                                                                                                                                                                                                                                                       | 1984                        |   |
| Partially Hydrogenated Vegetable Oil Industry Estimates of Total Retail and Food Service Volume as it appears in Global Dietary Database Consortium, Nutrition and Chronic Disease Expert Group (NutriCoDE). Global Dietary Database 1980-2011. [Unpublished].                                                                                                                                                                                                                                                                                                        | 2000, 2005, 2009            |   |
| United Kingdom General Household Survey 1980 as it appears in P.N. Lee Statistics and Computing. International Mortality and Smoking Statistics.                                                                                                                                                                                                                                                                                                                                                                                                                      | 1980                        |   |
| TRANSFAIR study as it appears in Global Dietary Database Consortium, Nutrition and Chronic Disease Expert Group (NutriCoDE). Global Dietary Database 1980-2011. [Unpublished].                                                                                                                                                                                                                                                                                                                                                                                        | 1996                        |   |
| United Kingdom ONS Omnibus Survey 1996 as it appears in P.N. Lee Statistics and Computing. International Mortality and Smoking Statistics.                                                                                                                                                                                                                                                                                                                                                                                                                            | 1996                        |   |
| England Teenage Smoking Attitudes Survey 1996 as it appears in P.N. Lee Statistics and Computing. International Mortality and Smoking Statistics.                                                                                                                                                                                                                                                                                                                                                                                                                     | 1996                        |   |
| United Kingdom ONS Omnibus Survey 1997 as it appears in P.N. Lee Statistics and Computing. International Mortality and Smoking Statistics.                                                                                                                                                                                                                                                                                                                                                                                                                            | 1997                        |   |
| England Teenage Smoking Attitudes Survey 1997 as it appears in P.N. Lee Statistics and Computing. International Mortality and Smoking Statistics.                                                                                                                                                                                                                                                                                                                                                                                                                     | 1997                        |   |
| England Teenage Smoking Attitudes Survey 1998 as it appears in P.N. Lee Statistics and Computing. International Mortality and Smoking Statistics.                                                                                                                                                                                                                                                                                                                                                                                                                     | 1998                        |   |
| Eurostat Database as it appears in World Health Organization (WHO). WHO Global InfoBase - Tobacco Use Prevalence                                                                                                                                                                                                                                                                                                                                                                                                                                                      | 1999                        |   |
| United Kingdom ONS Omnibus Survey 1999 as it appears in P.N. Lee Statistics and Computing. International Mortality and Smoking Statistics.                                                                                                                                                                                                                                                                                                                                                                                                                            | 1999                        |   |
| United Kingdom ONS Omnibus Survey 2000 as it appears in P.N. Lee Statistics and Computing. International Mortality and Smoking Statistics.                                                                                                                                                                                                                                                                                                                                                                                                                            | 2000                        |   |
| United Kingdom ONS Omnibus Survey 2001 as it appears in P.N. Lee Statistics and Computing. International Mortality and Smoking Statistics.                                                                                                                                                                                                                                                                                                                                                                                                                            | 2001                        |   |
| United Kingdom ONS Omnibus Survey 2002 as it appears in P.N. Lee Statistics and Computing. International Mortality and Smoking Statistics.                                                                                                                                                                                                                                                                                                                                                                                                                            | 2002                        |   |
| United Kingdom ONS Omnibus Survey 2003 as it appears in P.N. Lee Statistics and Computing. International Mortality and Smoking Statistics.                                                                                                                                                                                                                                                                                                                                                                                                                            | 2003                        |   |
| United Kingdom ONS Omnibus Survey 2004 as it appears in P.N. Lee Statistics and Computing. International Mortality and Smoking Statistics.                                                                                                                                                                                                                                                                                                                                                                                                                            | 2004                        |   |



|                                                                                                                                                                                                                                                                                                                                                            |                      |   |
|------------------------------------------------------------------------------------------------------------------------------------------------------------------------------------------------------------------------------------------------------------------------------------------------------------------------------------------------------------|----------------------|---|
| United Kingdom ONS Omnibus Survey 2005 as it appears in P.N. Lee Statistics and Computing. International Mortality and Smoking Statistics.                                                                                                                                                                                                                 | 2005                 |   |
| Sales of Tobacco Goods to the Trade 1980-89 as it appears in P.N. Lee Statistics and Computing. International Mortality and Smoking Statistics.                                                                                                                                                                                                            | 1980-1989            |   |
| General Health Related Behaviour Questionnaire as it appears in P.N. Lee Statistics and Computing. International Mortality and Smoking Statistics.                                                                                                                                                                                                         | 1984-1987            |   |
| United Kingdom - England North Thames (West) Congenital Malformation Register Data 1997-1998 - WHO as it appears in the European Surveillance of Congenital Anomalies (EUROCAT), International Centre on Birth Defects, World Health Organization (WHO). World Atlas of Birth Defects. 2nd ed. Geneva, Switzerland: World Health Organization (WHO), 2003. | 1997-1998            | * |
| United Kingdom - England Mersey Congenital Anomaly Survey Data 1998 - WHO as it appears in the European Surveillance of Congenital Anomalies (EUROCAT), International Centre on Birth Defects, World Health Organization (WHO). World Atlas of Birth Defects. 2nd ed. Geneva, Switzerland: World Health Organization (WHO), 2003.                          | 1998                 | * |
| United Kingdom - England and Wales Congenital Malformation Monitoring Program Data 1980 - ICBDMs as it appears in International Clearinghouse for Birth Defects Monitoring Systems. Congenital Malformations Worldwide: A Report from the International Clearinghouse for Birth Defects Monitoring Systems. Amsterdam, Netherlands: Elsevier, 1991.        | 1980                 |   |
| United Kingdom - England and Wales Congenital Malformation Monitoring Program Data 1982 - ICBDMs as it appears in International Clearinghouse for Birth Defects Monitoring Systems. Congenital Malformations Worldwide: A Report from the International Clearinghouse for Birth Defects Monitoring Systems. Amsterdam, Netherlands: Elsevier, 1991.        | 1982                 | * |
| United Kingdom - England and Wales Congenital Malformation Monitoring Program Data 1983 - ICBDMs as it appears in International Clearinghouse for Birth Defects Monitoring Systems. Congenital Malformations Worldwide: A Report from the International Clearinghouse for Birth Defects Monitoring Systems. Amsterdam, Netherlands: Elsevier, 1991.        | 1983                 | * |
| United Kingdom - England and Wales Congenital Malformation Monitoring Program Data 1984 - ICBDMs as it appears in International Clearinghouse for Birth Defects Monitoring Systems. Congenital Malformations Worldwide: A Report from the International Clearinghouse for Birth Defects Monitoring Systems. Amsterdam, Netherlands: Elsevier, 1991.        | 1984                 | * |
| United Kingdom - England and Wales Congenital Malformation Monitoring Program Data 1985 - ICBDMs as it appears in International Clearinghouse for Birth Defects Monitoring Systems. Congenital Malformations Worldwide: A Report from the International Clearinghouse for Birth Defects Monitoring Systems. Amsterdam, Netherlands: Elsevier, 1991.        | 1985                 | * |
| United Kingdom - England and Wales Congenital Malformation Monitoring Program Data 1986 - ICBDMs as it appears in International Clearinghouse for Birth Defects Monitoring Systems. Congenital Malformations Worldwide: A Report from the International Clearinghouse for Birth Defects Monitoring Systems. Amsterdam, Netherlands: Elsevier, 1991.        | 1986                 | * |
| United Kingdom - England and Wales Congenital Malformation Monitoring Program Data 1987 - ICBDMs as it appears in International Clearinghouse for Birth Defects Monitoring Systems. Congenital Malformations Worldwide: A Report from the International Clearinghouse for Birth Defects Monitoring Systems. Amsterdam, Netherlands: Elsevier, 1991.        | 1987                 | * |
| United Kingdom - England and Wales Congenital Malformation Monitoring Program Data 1988 - ICBDMs as it appears in International Clearinghouse for Birth Defects Monitoring Systems. Congenital Malformations Worldwide: A Report from the International Clearinghouse for Birth Defects Monitoring Systems. Amsterdam, Netherlands: Elsevier, 1991.        | 1988                 | * |
| United Nations Population Division. United Nations World Population Prospects 1950-2100 - 2010 Revision. New York City, United States: United Nations Population Division, 2011.                                                                                                                                                                           | 2005                 |   |
| Measles Supplementary Immunization Activity Data as provided by the World Health Organization. [Unpublished]                                                                                                                                                                                                                                               | 1994                 |   |
| Office of Population Censuses and Surveys. Notification of Infectious Diseases in England and Wales                                                                                                                                                                                                                                                        | 1970-2008            |   |
| United Nations Children's Fund (UNICEF), World Health Organization (WHO). WHO and UNICEF Reported Disease Incidence Time Series Measles. Geneva, Switzerland: World Health Organization (WHO).                                                                                                                                                             | 1980-1998, 2000-2013 |   |
| Bojesen A, Juul S, Birkebaek N, Gravholt CH. Increased mortality in Klinefelter syndrome. <i>J Clin Endocrinol Metab.</i> 2004; 89(8): 3830-4.                                                                                                                                                                                                             | 2004^                |   |
| Hunt GM, Oakshott P. Outcome in people with open spina bifida at age 35: prospective community based cohort study. <i>BMJ.</i> 2003; 326(7403): 136-6.                                                                                                                                                                                                     | 2003^                |   |
| Bowman RM, McLone DG, Grant JA, Tomita T, Ito JA. Spina bifida outcome: a 25-year prospective. <i>Pediatr Neurosurg.</i> 2001; 34(3): 114-20.                                                                                                                                                                                                              | 2001^                |   |
| Christensen K, Juel K, Herskind AM, Murray JC. Long term follow up study of survival associated with cleft lip and palate at birth. <i>BMJ.</i> 2004; 329: 1405.                                                                                                                                                                                           | 2004^                |   |
| Smile Train. China and India Smile Train Congenital Anomalies Data 2004-2009                                                                                                                                                                                                                                                                               | 2004-2009^           |   |
| Frid C, Drott P, Otterblad Olausson P, Sundelin C, Annerén G. Maternal and neonatal factors and mortality in children with Down syndrome born 1973-1980 and 1995-1998. <i>Acta Paediatr.</i> 2004; 93(1): 106-12.                                                                                                                                          | 2004^                |   |
| Baird PA, Sadovnick AD. Life expectancy in Down syndrome. <i>J Pediatr.</i> 1987; 110(6): 849-54                                                                                                                                                                                                                                                           | 1987^                |   |
| Tennant PWG, Pearce MS, Bythell M, Rankin J. 20-year survival of children born with congenital anomalies: a population-based study. <i>Lancet.</i> 2011; 375(9715): 649-56.                                                                                                                                                                                | 2010^                |   |
| Congenital Heart Anomalies Mortality Risk With No Diagnosis or Care Estimates as provided by the Global Burden of Disease 2010 congenital anomaly expert group. [Unpublished].                                                                                                                                                                             | 2010^                |   |
| Siciliani L, Hurst J. Explaining Waiting-Time Variations for Elective Surgery Across OECD Countries. <i>OECD Economic Studies.</i> 2004; 38(1): 95-123.                                                                                                                                                                                                    | 2004^                |   |
| Price WH, Clayton JF, Collyer S, De Mey R, Wilson J. Mortality ratios, life expectancy, and causes of death in patients with Turner's syndrome. <i>Epidemiol Community Health.</i> 1986; 40(2): 97-102.                                                                                                                                                    | 1986^                |   |
| Sinaï N, Plumb K, Cotton L, Lambert A, Kennedy S, Zondervan K, Stratton P. Differences in characteristics among 1,000 women with endometriosis based on extent of disease. <i>Fertil Steril.</i> 2007; 89(3): 538-45.                                                                                                                                      | 2007^                |   |
| Bushmakina AG, Cappelleri JC, Taylor-Stokes G, Sayers J, Sadosky A, Carroll D, Gosden T, Emery P. Relationship between patient-reported disease severity and other clinical outcomes in osteoarthritis: a European perspective. <i>J Med Econ.</i> 2011; 14(4): 381-9.                                                                                     | 2011^                | * |
| Fortnum H, Davis A. Hearing impairment in children after bacterial meningitis: incidence and resource implications. <i>Br J Audiol.</i> 1993; 27(1): 43-52.                                                                                                                                                                                                | 1993^                |   |
| Richardson M, Williamson T, Reid A, Tarlow M, Rudd P. Testing for hearing loss after meningitis. <i>J Pediatr.</i> 1998; 132(4): 749-50.                                                                                                                                                                                                                   | 1998^                |   |
| Bedford H, de Louvois J, Halket S, Peckham C, Hurley R, Harvey D. Meningitis in infancy in England and Wales: follow up at age 5 years. <i>BMJ.</i> 2003; 327(7312): 533-6.                                                                                                                                                                                | 2001^                |   |
| Archer LN, Levene MI, Evans DH. Cerebral artery Doppler ultrasonography for prediction of outcome after perinatal asphyxia. <i>Lancet.</i> 1986; 2(8516): 1116-8.                                                                                                                                                                                          | 1986^                |   |
| Gluckman PD, Wyatt JS, Azzopardi D, Ballard R, Edwards AD, Ferriero DM, Polin RA, Robertson CM, Thoresen M, Whitelaw A, Gunn AJ. Selective head cooling with mild systemic hypothermia after neonatal encephalopathy: multicentre randomised trial. <i>Lancet.</i> 2005; 365(9460): 663-70.                                                                | 2005^                |   |
| Brayne C, Calloway P. An epidemiological study of dementia in a rural population of elderly women. <i>Br J Psychiatry.</i> 1989; 155: 214-9.                                                                                                                                                                                                               | 1989^                |   |
| Clarke M, Jagger C, Anderson J, Battcock T, Kelly F, Stern MC. The prevalence of dementia in a total population: a comparison of two screening instruments. <i>Age Ageing.</i> 1991; 20(6): 396-403.                                                                                                                                                       | 1991^                |   |
| Schrag A, Jahanshahi M, Quinn N. What contributes to quality of life in patients with Parkinson's disease? <i>J Neurol Neurosurg Psychiatry.</i> 2000; 69(3): 308-12.                                                                                                                                                                                      | 2000^                |   |
| Cruz N, Vieta E, Comes M, Haro JM, Reed C, Bertsch J, EMBLEM Advisory Board. Rapid-cycling bipolar I disorder: course and treatment outcome in a large sample across Europe. <i>J Psychiatr Res.</i> 2008; 42(13): 1068-75.                                                                                                                                | 2008^                |   |
| Mutch LM, Brown NJ, Speidel BD, Dunn PM. Perinatal mortality and neonatal survival in Avon: 1976-9. <i>Br Med J (Clin Res Ed).</i> 1981; 282(6258): 119-22.                                                                                                                                                                                                | 1981^                |   |
| Adeyoku AB, Olujohungbe AB, Morris J, Yardumian A, Bareford D, Akenova A, Akinyanju O, Cinkotai K, O'Reilly PH. Priapism in sickle-cell disease: incidence, risk factors and complications - an international multicentre study. <i>BJU Int.</i> 2002; 90(9): 898-902.                                                                                     | 2002^                |   |
| Global Parkinson's Disease Survey Steering Committee. Factors impacting on quality of life in Parkinson's disease: results from an international survey. <i>Mov Disord.</i> 2002; 17(1): 60-7.                                                                                                                                                             | 2002^                |   |
| Tsakos G, Herrick K, Sheiham A, Watt RG. Edentulism and fruit and vegetable intake in low-income adults. <i>J Dent Res.</i> 2010; 89(5): 462-7.                                                                                                                                                                                                            | 2010^                |   |
| Nuttall NM, Steele JG, Evans D, Chadwick B, Morris AJ, Hill K. The reported impact of oral condition on children in the United Kingdom, 2003. <i>J Dent.</i> 2006; 34(10): 551-5.                                                                                                                                                                          | 2006^                |   |
| Sheiham A, Steele J. Does the condition of the mouth and teeth affect the ability to eat certain foods, nutrient and dietary intake and nutritional status amongst older people? <i>Public Health Nutr.</i> 2001; 4(3): 797-803.                                                                                                                           | 2001^                |   |
| Mason C, Porter SR, Madland G, Parry J. Early management of dental pain in children and adolescents. <i>J Dent.</i> 1997; 25(1): 31-4.                                                                                                                                                                                                                     | 1997^                |   |
| Bradbury J, Thomason JM, Jepson NJA, Walls AWG, Mulvaney CE, Allen PF, Moynihan PJ. Perceived chewing ability and intake of fruit and vegetables. <i>J Dent Res.</i> 2008; 87(8): 720-5.                                                                                                                                                                   | 2008^                |   |

|                                                                                                                                                                                                                          |                   |  |
|--------------------------------------------------------------------------------------------------------------------------------------------------------------------------------------------------------------------------|-------------------|--|
| Shepherd MA, Nadanovsky P, Sheiham A. The prevalence and impact of dental pain in 8-year-old school children in Harrow, England. Br Dent 1999; 187(1): 38-41.                                                            | 1999 <sup>^</sup> |  |
| Galloway H, Clark NS, Blackhall M. Paediatric aspects of the Aberdeen typhoid outbreak. Arch Dis Child. 1966; 41(215): 63-4.                                                                                             | 1966 <sup>^</sup> |  |
| Ispahani P, Slack RC. Enteric fever and other extraintestinal salmonellosis in University Hospital, Nottingham, UK, between 1980 and 1997. Eur J Clin Microbiol Infect Dis. 2000; 19(9): 679-87.                         | 2000 <sup>^</sup> |  |
| Sloan N, Durocher J, Aldrich T, Blum J, Winikoff B. What measured blood loss tells us about postpartum bleeding: a systematic review. BJOG. 2011; 117(7): 788-800.                                                       | 2010 <sup>^</sup> |  |
| Institute for Health Metrics and Evaluation (IHME), Joint United Nations Program on HIV/AIDS (UNAIDS). Institute for Health Metrics and Evaluation HIV Mortality Estimates Based on the UNAIDS Spectrum Model Framework. |                   |  |

\*For databases, multinational reports, hospital data and scientific literature, the Year column represents the year that the data were used for (the estimate year). For all other data types (surveys, vital registration, etc.), Year indicates the source year or year of data collection.

<sup>^</sup>For these sources, Year indicates the source year or year of data collection. For all others, Year represents the year that the data were used for (the estimate year).

Web Table 3 : Age-standardized death, years of life lost (YLL), years lived with disability (YLD), and disability-adjusted life years (DALY) rates with life expectancy at birth for 1990 and 2013 for both sexes combined

|                          | Age-standardized death rate (per 100,000) |               |                  |               |                           |               |                           |               |                          |               |                          |               |                           |               |                           |               |                     |               | Age-standardized YLL rate (per 100,000) |               |      |      |      |      | Age-standardized YLD rate (per 100,000) |      |      |      |      |      | Age-standardized DALY rate (per 100,000) |      |  |  |  |  | Life expectancy at birth (years) |  |  |  |  |  |
|--------------------------|-------------------------------------------|---------------|------------------|---------------|---------------------------|---------------|---------------------------|---------------|--------------------------|---------------|--------------------------|---------------|---------------------------|---------------|---------------------------|---------------|---------------------|---------------|-----------------------------------------|---------------|------|------|------|------|-----------------------------------------|------|------|------|------|------|------------------------------------------|------|--|--|--|--|----------------------------------|--|--|--|--|--|
|                          | 1990                                      |               |                  |               | 2013                      |               |                           |               | 1990                     |               |                          |               | 2013                      |               |                           |               | 1990                |               |                                         | 2013          |      |      | 1990 |      |                                         | 2013 |      |      |      |      |                                          |      |  |  |  |  |                                  |  |  |  |  |  |
|                          | Rate                                      | Rank          | Rate             | Rank          | Rate                      | Rank          | Rate                      | Rank          | Rate                     | Rank          | Rate                     | Rank          | Rate                      | Rank          | Rate                      | Rank          | Rate                | Rank          | Rate                                    | Rank          | Rate | Rank | Rate | Rank | Rate                                    | Rank | Rate | Rank | Rate | Rank | Rate                                     | Rank |  |  |  |  |                                  |  |  |  |  |  |
|                          |                                           |               |                  |               |                           |               |                           |               |                          |               |                          |               |                           |               |                           |               |                     |               |                                         |               |      |      |      |      |                                         |      |      |      |      |      |                                          |      |  |  |  |  |                                  |  |  |  |  |  |
| United Kingdom           | 771<br>(768-775)                          | 19<br>(18-20) | 516<br>(497-535) | 16<br>(13-20) | 15,028<br>(14,962-15,101) | 17<br>(16-17) | 8,975<br>(8,578-9,373)    | 15<br>(12-19) | 11,445<br>(8,547-14,709) | 13<br>(10-19) | 11,281<br>(8,392-14,542) | 16<br>(11-19) | 26,474<br>(23,567-29,754) | 16<br>(15-18) | 20,256<br>(17,367-23,463) | 15<br>(11-19) | 75.7<br>(75.7-75.8) | 17<br>(16-18) | 81.0<br>(80.6-81.4)                     | 15<br>(12-18) |      |      |      |      |                                         |      |      |      |      |      |                                          |      |  |  |  |  |                                  |  |  |  |  |  |
| England                  | 759<br>(756-763)                          | 15<br>(15-17) | 504<br>(486-522) | 12<br>(9-15)  | 14,743<br>(14,669-14,817) | 13<br>(13-15) | 8,687<br>(8,298-9,077)    | 11<br>(8-15)  | 11,346<br>(8,474-14,613) | 8<br>(5-15)   | 11,185<br>(8,321-14,423) | 11<br>(7-15)  | 26,089<br>(23,211-29,349) | 13<br>(12-15) | 19,873<br>(17,014-23,060) | 10<br>(6-14)  | 75.9<br>(75.9-76.0) | 14<br>(13-15) | 81.3<br>(80.9-81.7)                     | 12<br>(8-14)  |      |      |      |      |                                         |      |      |      |      |      |                                          |      |  |  |  |  |                                  |  |  |  |  |  |
| East Midlands            | 764<br>(756-773)                          | 17<br>(15-19) | 507<br>(484-531) | 13<br>(9-19)  | 14,804<br>(14,607-15,004) | 14<br>(13-16) | 8,762<br>(8,310-9,266)    | 12<br>(8-18)  | 11,357<br>(8,415-14,631) | 9<br>(3-23)   | 11,155<br>(8,325-14,380) | 9<br>(2-21)   | 26,161<br>(23,221-29,518) | 14<br>(12-17) | 19,918<br>(17,022-23,120) | 11<br>(5-17)  | 75.9<br>(75.7-76.0) | 15<br>(13-17) | 81.2<br>(80.7-81.7)                     | 13<br>(8-17)  |      |      |      |      |                                         |      |      |      |      |      |                                          |      |  |  |  |  |                                  |  |  |  |  |  |
| East of England          | 701<br>(693-709)                          | 10<br>(8-11)  | 469<br>(446-488) | 3<br>(1-8)    | 13,085<br>(12,899-13,260) | 2<br>(2-5)    | 7,860<br>(7,441-8,268)    | 3<br>(1-6)    | 11,263<br>(8,384-14,416) | 5<br>(1-19)   | 11,199<br>(8,349-14,416) | 12<br>(3-23)  | 24,349<br>(21,409-27,549) | 2<br>(1-6)    | 19,059<br>(16,209-22,245) | 2<br>(1-6)    | 77.1<br>(77.0-77.2) | 6<br>(3-10)   | 82.2<br>(81.8-82.8)                     | 2<br>(1-6)    |      |      |      |      |                                         |      |      |      |      |      |                                          |      |  |  |  |  |                                  |  |  |  |  |  |
| Greater London           | 777<br>(763-789)                          | 20<br>(17-23) | 501<br>(475-527) | 11<br>(7-18)  | 15,435<br>(15,138-15,735) | 20<br>(18-23) | 8,563<br>(8,049-9,076)    | 10<br>(5-16)  | 11,400<br>(8,550-14,672) | 12<br>(3-23)  | 11,275<br>(8,335-14,571) | 15<br>(4-24)  | 26,835<br>(23,931-30,176) | 19<br>(16-22) | 19,839<br>(16,977-23,133) | 8<br>(4-17)   | 75.5<br>(75.3-75.7) | 19<br>(17-24) | 81.4<br>(80.8-82.0)                     | 10<br>(5-16)  |      |      |      |      |                                         |      |      |      |      |      |                                          |      |  |  |  |  |                                  |  |  |  |  |  |
| North East England       | 861<br>(851-872)                          | 31<br>(30-31) | 557<br>(533-586) | 27<br>(22-30) | 16,863<br>(16,609-17,124) | 30<br>(30-30) | 9,744<br>(9,186-10,325)   | 25<br>(21-29) | 11,512<br>(8,597-14,728) | 18<br>(4-28)  | 11,306<br>(8,415-14,605) | 17<br>(3-26)  | 28,376<br>(25,460-31,665) | 30<br>(27-30) | 21,051<br>(18,056-24,360) | 25<br>(17-29) | 74.4<br>(74.2-74.5) | 30<br>(30-31) | 80.0<br>(79.5-80.6)                     | 25<br>(20-29) |      |      |      |      |                                         |      |      |      |      |      |                                          |      |  |  |  |  |                                  |  |  |  |  |  |
| North West England       | 827<br>(819-836)                          | 29<br>(28-29) | 557<br>(534-581) | 26<br>(22-29) | 16,297<br>(16,126-16,477) | 28<br>(25-29) | 9,954<br>(9,411-10,480)   | 28<br>(23-30) | 11,298<br>(8,457-14,488) | 7<br>(2-17)   | 11,070<br>(8,283-14,202) | 4<br>(2-16)   | 27,596<br>(24,793-30,795) | 25<br>(22-27) | 21,024<br>(18,075-24,214) | 24<br>(18-29) | 74.8<br>(74.7-74.9) | 29<br>(27-29) | 80.0<br>(79.5-80.5)                     | 26<br>(22-30) |      |      |      |      |                                         |      |      |      |      |      |                                          |      |  |  |  |  |                                  |  |  |  |  |  |
| South East England       | 691<br>(685-698)                          | 7<br>(7-9)    | 463<br>(444-483) | 2<br>(1-7)    | 13,103<br>(12,953-13,248) | 3<br>(2-5)    | 7,639<br>(7,263-8,039)    | 1<br>(1-4)    | 11,018<br>(8,214-14,234) | 1<br>(1-8)    | 10,960<br>(8,133-14,190) | 3<br>(1-15)   | 24,121<br>(21,350-27,376) | 1<br>(1-3)    | 18,599<br>(15,722-21,725) | 1<br>(1-2)    | 77.2<br>(77.1-77.3) | 3<br>(3-6)    | 82.4<br>(81.9-82.8)                     | 1<br>(1-4)    |      |      |      |      |                                         |      |      |      |      |      |                                          |      |  |  |  |  |                                  |  |  |  |  |  |
| South West England       | 693<br>(686-700)                          | 8<br>(6-9)    | 477<br>(456-496) | 7<br>(3-10)   | 13,173<br>(12,994-13,339) | 4<br>(2-6)    | 8,136<br>(7,723-8,545)    | 5<br>(3-9)    | 11,455<br>(8,469-14,803) | 15<br>(2-26)  | 11,083<br>(8,194-14,355) | 7<br>(2-21)   | 24,629<br>(21,688-27,954) | 6<br>(2-8)    | 19,220<br>(16,287-22,399) | 3<br>(2-7)    | 77.1<br>(77.0-77.3) | 5<br>(3-8)    | 82.0<br>(81.5-82.4)                     | 4<br>(2-9)    |      |      |      |      |                                         |      |      |      |      |      |                                          |      |  |  |  |  |                                  |  |  |  |  |  |
| West Midlands            | 784<br>(776-792)                          | 22<br>(20-23) | 520<br>(495-541) | 17<br>(12-21) | 15,409<br>(15,218-15,605) | 19<br>(18-22) | 9,258<br>(8,744-9,753)    | 19<br>(15-23) | 11,496<br>(8,610-14,798) | 17<br>(7-25)  | 11,417<br>(8,523-14,723) | 21<br>(12-26) | 26,906<br>(23,987-30,141) | 20<br>(18-21) | 20,675<br>(17,659-23,950) | 20<br>(15-25) | 75.5<br>(75.3-75.6) | 20<br>(19-23) | 80.9<br>(80.4-81.4)                     | 16<br>(13-21) |      |      |      |      |                                         |      |      |      |      |      |                                          |      |  |  |  |  |                                  |  |  |  |  |  |
| Yorkshire and the Humber | 794<br>(786-804)                          | 23<br>(22-27) | 534<br>(510-557) | 20<br>(16-24) | 15,567<br>(15,371-15,774) | 22<br>(19-23) | 9,404<br>(8,913-9,910)    | 22<br>(17-25) | 11,544<br>(8,635-14,831) | 20<br>(5-27)  | 11,343<br>(8,431-14,598) | 19<br>(4-25)  | 27,111<br>(24,167-30,442) | 21<br>(18-23) | 20,747<br>(17,815-24,032) | 21<br>(15-26) | 75.3<br>(75.2-75.5) | 23<br>(20-25) | 80.6<br>(80.1-81.1)                     | 21<br>(16-24) |      |      |      |      |                                         |      |      |      |      |      |                                          |      |  |  |  |  |                                  |  |  |  |  |  |
| Northern Ireland         | 800<br>(787-812)                          | 27<br>(23-27) | 578<br>(550-607) | 29<br>(26-31) | 15,716<br>(15,421-16,013) | 23<br>(20-24) | 10,237<br>(9,625-10,865)  | 30<br>(25-30) | 11,840<br>(8,813-15,148) | 26<br>(16-32) | 11,596<br>(8,598-14,920) | 24<br>(14-31) | 27,556<br>(24,508-30,863) | 23<br>(21-28) | 21,833<br>(18,682-25,202) | 30<br>(27-30) | 75.2<br>(75.0-75.4) | 24<br>(22-27) | 79.6<br>(79.1-80.2)                     | 30<br>(25-31) |      |      |      |      |                                         |      |      |      |      |      |                                          |      |  |  |  |  |                                  |  |  |  |  |  |
| Scotland                 | 881<br>(872-889)                          | 32<br>(32-32) | 606<br>(576-626) | 32<br>(29-32) | 17,611<br>(17,385-17,844) | 31<br>(31-32) | 10,948<br>(10,435-11,552) | 31<br>(31-31) | 12,134<br>(9,008-15,581) | 30<br>(24-32) | 12,064<br>(8,890-15,432) | 30<br>(25-32) | 29,746<br>(26,654-33,187) | 32<br>(31-32) | 23,013<br>(19,840-26,521) | 31<br>(31-32) | 73.9<br>(73.8-74.1) | 32<br>(32-32) | 79.5<br>(78.5-79.5)                     | 31<br>(30-32) |      |      |      |      |                                         |      |      |      |      |      |                                          |      |  |  |  |  |                                  |  |  |  |  |  |
| Wales                    | 771<br>(760-781)                          | 18<br>(16-21) | 545<br>(520-569) | 24<br>(18-27) | 14,881<br>(14,646-15,113) | 15<br>(13-17) | 9,739<br>(9,132-10,262)   | 24<br>(20-29) | 11,640<br>(8,692-15,027) | 23<br>(9-30)  | 11,397<br>(8,517-14,704) | 20<br>(4-29)  | 26,522<br>(23,664-29,870) | 17<br>(14-20) | 21,136<br>(18,106-24,517) | 26<br>(17-29) | 75.8<br>(75.6-76.0) | 16<br>(14-18) | 80.3<br>(79.8-80.9)                     | 23<br>(18-27) |      |      |      |      |                                         |      |      |      |      |      |                                          |      |  |  |  |  |                                  |  |  |  |  |  |
| Australia                | 679<br>(675-684)                          | 5<br>(4-6)    | 472<br>(455-491) | 5<br>(1-9)    | 13,615<br>(13,506-13,736) | 9<br>(7-10)   | 8,288<br>(7,923-8,687)    | 7<br>(4-11)   | 12,077<br>(9,032-15,487) | 29<br>(23-32) | 12,071<br>(8,996-15,547) | 31<br>(26-32) | 25,692<br>(22,630-29,132) | 12<br>(11-14) | 20,359<br>(17,328-23,820) | 16<br>(9-23)  | 77.0<br>(76.9-77.1) | 8<br>(5-11)   | 81.8<br>(81.4-82.2)                     | 5<br>(2-11)   |      |      |      |      |                                         |      |      |      |      |      |                                          |      |  |  |  |  |                                  |  |  |  |  |  |
| Austria                  | 761<br>(753-768)                          | 16<br>(15-18) | 524<br>(500-548) | 18<br>(11-24) | 15,271<br>(15,110-15,432) | 18<br>(18-20) | 9,133<br>(8,652-9,598)    | 18<br>(11-23) | 11,082<br>(8,295-14,330) | 3<br>(1-18)   | 10,851<br>(8,049-13,987) | 2<br>(1-14)   | 26,354<br>(23,571-29,635) | 15<br>(13-19) | 19,985<br>(17,095-23,156) | 13<br>(4-19)  | 75.7<br>(75.6-75.8) | 18<br>(16-19) | 80.8<br>(80.3-81.3)                     | 17<br>(12-23) |      |      |      |      |                                         |      |      |      |      |      |                                          |      |  |  |  |  |                                  |  |  |  |  |  |
| Belgium                  | 744<br>(737-751)                          | 13<br>(13-14) | 538<br>(508-570) | 22<br>(13-28) | 14,897<br>(14,764-15,025) | 16<br>(14-17) | 9,717<br>(9,095-10,401)   | 23<br>(18-30) | 11,842<br>(8,835-15,261) | 27<br>(19-29) | 11,535<br>(8,595-14,812) | 23<br>(13-27) | 26,739<br>(23,654-30,130) | 18<br>(15-21) | 21,253<br>(18,099-24,689) | 28<br>(18-30) | 76.0<br>(75.9-76.1) | 13<br>(13-15) | 80.2<br>(79.5-80.8)                     | 24<br>(17-30) |      |      |      |      |                                         |      |      |      |      |      |                                          |      |  |  |  |  |                                  |  |  |  |  |  |
| Canada                   | 660<br>(656-663)                          | 2<br>(1-2)    | 488<br>(469-506) | 9<br>(3-13)   | 13,267<br>(13,176-13,350) | 5<br>(3-6)    | 8,817<br>(8,398-9,225)    | 14<br>(8-18)  | 11,193<br>(8,295-14,398) | 4<br>(1-18)   | 11,129<br>(8,237-14,278) | 8<br>(2-21)   | 24,461<br>(21,581-27,678) | 3<br>(1-6)    | 19,946<br>(17,047-23,221) | 12<br>(6-17)  | 77.4<br>(77.3-77.5) | 2<br>(2-2)    | 81.5<br>(81.1-81.9)                     | 9<br>(5-15)   |      |      |      |      |                                         |      |      |      |      |      |                                          |      |  |  |  |  |                                  |  |  |  |  |  |
| Denmark                  | 798<br>(791-805)                          | 26<br>(23-27) | 571<br>(549-601) | 28<br>(23-32) | 16,147<br>(15,984-16,329) | 26<br>(24-28) | 9,852<br>(9,384-10,408)   | 26<br>(20-30) | 11,458<br>(8,635-14,822) | 14<br>(3-26)  | 11,154<br>(8,349-14,421) | 10<br>(3-22)  | 27,605<br>(24,765-30,993) | 24<br>(21-28) | 21,006<br>(18,089-24,313) | 23<br>(17-29) | 75.1<br>(74.9-75.2) | 26<br>(24-27) | 79.9<br>(79.4-80.4)                     | 27<br>(21-30) |      |      |      |      |                                         |      |      |      |      |      |                                          |      |  |  |  |  |                                  |  |  |  |  |  |
| Finland                  | 797<br>(788-806)                          | 25<br>(23-27) | 514<br>(492-537) | 15<br>(9-22)  | 16,047<br>(15,866-16,253) | 24<br>(24-27) | 9,401<br>(8,884-9,900)    | 21<br>(14-26) | 12,135<br>(9,103-15,585) | 31<br>(26-32) | 11,788<br>(8,813-15,195) | 27<br>(20-31) | 28,183<br>(25,103-31,693) | 29<br>(26-30) | 21,190<br>(18,130-24,590) | 27<br>(18-30) | 75.0<br>(74.9-75.2) | 27<br>(24-27) | 80.6<br>(80.1-81.1)                     | 20<br>(14-25) |      |      |      |      |                                         |      |      |      |      |      |                                          |      |  |  |  |  |                                  |  |  |  |  |  |
| France                   | 658<br>(654-663)                          | 1<br>(1-2)    | 471<br>(456-488) | 4<br>(1-9)    | 13,852<br>(13,784-13,918) | 12<br>(10-12) | 8,759<br>(8,395-9,126)    | 13<br>(8-18)  | 11,268<br>(8,453-14,462) | 6<br>(1-18)   | 11,084<br>(8,314-14,204) | 5<br>(1-18)   | 25,121<br>(22,289-28,340) | 8<br>(6-11)   | 19,843<br>(16,954-23,049) | 9<br>(5-16)   | 77.1<br>(77.1-77.2) | 4<br>(3-6)    | 81.7<br>(81.3-82.1)                     | 3<br>(3-12)   |      |      |      |      |                                         |      |      |      |      |      |                                          |      |  |  |  |  |                                  |  |  |  |  |  |
| Germany                  | 779<br>(774-783)                          | 21<br>(19-22) | 528<br>(519-536) | 19<br>(15-23) | 15,527<br>(15,457-15,598) | 21<br>(19-23) | 9,069<br>(8,887-9,256)    | 17<br>(13-21) | 12,265<br>(9,158-15,820) | 32<br>(27-32) | 11,910<br>(8,832-15,364) | 29<br>(25-32) | 27,793<br>(24,675-31,401) | 27<br>(22-28) | 20,980<br>(17,879-24,449) | 22<br>(18-28) | 75.4<br>(75.4-75.5) | 21<br>(19-23) | 80.7<br>(80.5-80.9)                     | 18<br>(15-22) |      |      |      |      |                                         |      |      |      |      |      |                                          |      |  |  |  |  |                                  |  |  |  |  |  |
| Greece                   | 722<br>(716-727)                          | 12<br>(12-12) | 583<br>(564-604) | 30<br>(27-32) | 13,542<br>(13,425-13,656) | 8<br>(7-9)    | 9,928<br>(9,507-10,359)   | 27<br>(2-15)  | 11,067<br>(8,273-14,316) | 2<br>(1-2)    | 10,735<br>(8,006-13,866) | 1<br>(1-9)    | 24,609<br>(21,790-27,848) | 4<br>(2-7)    | 20,663<br>(17,796-23,777) | 19<br>(13-27) | 77.0<br>(76.9-77.1) | 9<br>(6-11)   | 79.8<br>(79.4-80.2)                     | 29<br>(23-30) |      |      |      |      |                                         |      |      |      |      |      |                                          |      |  |  |  |  |                                  |  |  |  |  |  |
| Ireland                  | 847<br>(836-858)                          | 30<br>(30-31) | 547<br>(503-595) | 23<br>(12-31) | 16,202<br>(15,952-16,426) | 27<br>(24-29) | 9,398<br>(8,552-10,391)   | 20<br>(10-30) | 11,357<br>(8,475-14,593) | 10<br>(2-22)  | 11,071<br>(8,260-14,265) | 6<br>(1-21)   | 27,559<br>(24,730-30,814) | 22<br>(21-27) | 20,469<br>(17,403-23,756) | 17<br>(6-29)  | 74.8<br>(74.7-75.0) | 28<br>(27-29) | 80.4<br>(79.5-81.3)                     | 22<br>(11-30) |      |      |      |      |                                         |      |      |      |      |      |                                          |      |  |  |  |  |                                  |  |  |  |  |  |
| Italy                    | 683<br>(679-688)                          | 6<br>(5-7)    | 457<br>(433-484) | 1<br>(1-8)    | 13,523<br>(13,447-13,605) | 7<br>(7-9)    | 7,767<br>(7,261-8,278)    | 2<br>(1-7)    | 11,628<br>(8,273-14,949) | 22<br>(6-27)  | 11,504<br>(8,554-14,804) | 22<br>(10-28) | 25,151<br>(22,244-28,441) | 9<br>(6-11)   | 19,271<br>(16,264-22,575) | 4<br>(1-10)   | 77.0<br>(76.9-77.0) | 10<br>(7-11)  | 82.1<br>(81.5-82.7)                     | 3<br>(1-9)    |      |      |      |      |                                         |      |      |      |      |      |                                          |      |  |  |  |  |                                  |  |  |  |  |  |
| Luxembourg               | 795<br>(774-815)                          | 24<br>(20-27) | 482<br>(445-521) | 8<br>(1-18)   | 16,033<br>(15,538-16,505) | 25<br>(22-29) | 8,443<br>(7,671-9,189)    | 9<br>(2-18)   | 11,704<br>(8,807-15,147) | 24<br>(8-30)  | 11,648<br>(8,725-15,008) | 26<br>(12-31) | 27,737<br>(24,640-31,274) | 26<br>(21-30) | 20,091<br>(16,982-23,518) | 14<br>(4-23)  | 75.1<br>(74.8-75.4) | 25<br>(21-28) | 81.1<br>(80.3-81.9)                     | 14<br>(4-23)  |      |      |      |      |                                         |      |      |      |      |      |                                          |      |  |  |  |  |                                  |  |  |  |  |  |

|               |                  |               |                  |               |                           |               |                           |               |                          |               |                          |               |                           |               |                           |               |                     |               |                     |               |
|---------------|------------------|---------------|------------------|---------------|---------------------------|---------------|---------------------------|---------------|--------------------------|---------------|--------------------------|---------------|---------------------------|---------------|---------------------------|---------------|---------------------|---------------|---------------------|---------------|
| Netherlands   | 700<br>(695-705) | 9<br>(8-11)   | 535<br>(514-558) | 21<br>(15-26) | 13,327<br>(13,220-13,442) | 6<br>(4-6)    | 8,992<br>(8,559-9,449)    | 16<br>(10-21) | 11,625<br>(8,616-14,925) | 21<br>(9-26)  | 11,612<br>(8,694-14,953) | 25<br>(17-28) | 24,952<br>(21,955-28,215) | 7<br>(5-10)   | 20,604<br>(17,558-24,065) | 18<br>(13-25) | 77.0<br>(76.9-77.1) | 7<br>(5-11)   | 80.6<br>(80.1-81.0) | 19<br>(14-25) |
| Norway        | 705<br>(697-714) | 11<br>(9-11)  | 508<br>(492-522) | 14<br>(9-18)  | 13,727<br>(13,541-13,924) | 10<br>(8-12)  | 8,442<br>(8,157-8,726)    | 8<br>(5-13)   | 11,466<br>(8,517-14,630) | 16<br>(4-24)  | 11,208<br>(8,314-14,384) | 13<br>(4-22)  | 25,194<br>(22,288-28,358) | 10<br>(6-12)  | 19,650<br>(16,748-22,762) | 6<br>(3-13)   | 76.8<br>(76.7-76.9) | 12<br>(11-12) | 81.4<br>(81.1-81.7) | 11<br>(7-15)  |
| Portugal      | 818<br>(811-824) | 28<br>(27-29) | 548<br>(523-569) | 25<br>(19-28) | 17,750<br>(17,600-17,887) | 32<br>(31-32) | 10,006<br>(9,512-10,482)  | 29<br>(22-30) | 11,535<br>(8,522-14,855) | 19<br>(5-27)  | 11,315<br>(8,343-14,597) | 18<br>(4-25)  | 29,285<br>(26,299-32,593) | 31<br>(31-32) | 21,322<br>(18,226-24,539) | 29<br>(19-30) | 74.3<br>(74.2-74.4) | 31<br>(30-31) | 79.8<br>(79.4-80.3) | 28<br>(22-30) |
| Spain         | 674<br>(668-680) | 4<br>(3-5)    | 474<br>(456-492) | 6<br>(1-9)    | 13,821<br>(13,724-13,910) | 11<br>(10-12) | 8,202<br>(7,855-8,566)    | 6<br>(3-10)   | 11,380<br>(8,491-14,574) | 11<br>(4-21)  | 11,207<br>(8,355-14,482) | 14<br>(3-22)  | 25,201<br>(22,325-28,423) | 11<br>(7-11)  | 19,410<br>(16,472-22,695) | 5<br>(2-10)   | 77.0<br>(76.9-77.1) | 11<br>(7-11)  | 81.7<br>(81.3-82.1) | 7<br>(2-12)   |
| Sweden        | 668<br>(662-673) | 3<br>(3-4)    | 499<br>(477-521) | 10<br>(6-18)  | 12,605<br>(12,477-12,731) | 1<br>(1-1)    | 7,971<br>(7,550-8,379)    | 4<br>(1-8)    | 12,031<br>(9,036-15,408) | 28<br>(22-32) | 11,813<br>(8,777-15,134) | 28<br>(19-32) | 24,636<br>(21,602-27,984) | 5<br>(2-9)    | 19,785<br>(16,714-23,079) | 7<br>(3-16)   | 77.6<br>(77.5-77.7) | 1<br>(1-1)    | 81.8<br>(81.3-82.2) | 6<br>(2-12)   |
| United States | 745<br>(742-747) | 14<br>(13-14) | 594<br>(564-623) | 31<br>(26-32) | 16,364<br>(16,317-16,410) | 29<br>(27-29) | 11,930<br>(11,260-12,682) | 32<br>(32-32) | 11,812<br>(8,871-15,077) | 25<br>(15-29) | 12,074<br>(9,026-15,444) | 32<br>(27-32) | 28,177<br>(25,207-31,454) | 28<br>(26-30) | 24,004<br>(20,866-27,371) | 32<br>(31-32) | 75.4<br>(75.4-75.4) | 22<br>(20-23) | 78.9<br>(78.3-79.5) | 32<br>(30-32) |

Web Table 4 : Deaths in England in 1990 and 2013 for all ages and age-standardized rates (per 100,000) by sex with 95% UI and percentage change. Percent changes in bold denote a statistically significant change.

| Cause                                                                    | Both sexes combined            |                                |                                               |                                     |                                |                                        |                                |                                |                                          |                                     |                                |                                          | Males                          |                                |                                            |                                     |                                |                                        | Females |  |  |  |  |  |
|--------------------------------------------------------------------------|--------------------------------|--------------------------------|-----------------------------------------------|-------------------------------------|--------------------------------|----------------------------------------|--------------------------------|--------------------------------|------------------------------------------|-------------------------------------|--------------------------------|------------------------------------------|--------------------------------|--------------------------------|--------------------------------------------|-------------------------------------|--------------------------------|----------------------------------------|---------|--|--|--|--|--|
|                                                                          | Deaths (in thousands)          |                                |                                               | Age-standardized rate (per 100,000) |                                |                                        | Deaths (in thousands)          |                                |                                          | Age-standardized rate (per 100,000) |                                |                                          | Deaths (in thousands)          |                                |                                            | Age-standardized rate (per 100,000) |                                |                                        |         |  |  |  |  |  |
|                                                                          | 1990                           | 2013                           | % change                                      | 1990                                | 2013                           | % change                               | 1990                           | 2013                           | % change                                 | 1990                                | 2013                           | % change                                 | 1990                           | 2013                           | % change                                   | 1990                                | 2013                           | % change                               |         |  |  |  |  |  |
| <b>All causes</b>                                                        | 535.4<br>(533.0 to 537.9)      | 479.3<br>(462.4 to 495.8)      | -10.5<br>(-13.05 to -7.27)                    | 799.6<br>(756.4 to 843.1)           | 503.3<br>(486.1 to 520.8)      | -39.8<br>(-46.1 to -33.9)              | 251.6<br>(235.8 to 267.2)      | 213.2<br>(203.1 to 223.4)      | -14.2<br>(-19.6 to -8.97)                | 992.2<br>(951.9 to 1039.4)          | 580.4<br>(554.4 to 606.4)      | -41.8<br>(-48.7 to -35.6)                | 717.8<br>(672.1 to 775.5)      | 499.1<br>(473.2 to 526.9)      | -8.8<br>(-13.9 to -4.0)                    | 616.5<br>(582.4 to 650.5)           | 413.7<br>(394.4 to 433.5)      | -32.8<br>(-38.3 to -27.6)              |         |  |  |  |  |  |
| <b>Communicable, maternal, neonatal, and nutritional diseases</b>        | 36.5 to 46.6<br>(35.9 to 47.7) | 39.4 to 47.1<br>(37.2 to 49.5) | 6.9 to 11.9<br>(-2.7 to 11.5)                 | 56.1 to 66.7<br>(53.3 to 69.7)      | 47.2 to 58.1<br>(36.9 to 47.2) | -15.3 to -22.0<br>(-35.88 to -22.02)   | 15.1 to 16.2<br>(14.1 to 19.3) | 10.2 to 15.6<br>(8.59 to 19.2) | -33.5 to -47.7<br>(-57.7 to 7.7)         | 67.7 to 77.7<br>(57.1 to 117.7)     | 41.4 to 45.1<br>(37.1 to 47.1) | -38.7 to -42.6<br>(-42.44 to -25.66)     | 23.1 to 25.5<br>(21.9 to 28.7) | 21.6 to 24.0<br>(20.1 to 30.0) | -8.3 to -10.9<br>(-14.96 to -11.99)        | 45.6 to 53.4<br>(48.1 to 62.1)      | 31.6 to 35.9<br>(34.2 to 47.8) | -31.5 to -35.2<br>(-34.01 to -15.22)   |         |  |  |  |  |  |
| <b>HIV/AIDS and tuberculosis</b>                                         | 0.8 to 1.0<br>(0.8 to 1.0)     | 0.5 to 0.7<br>(0.5 to 0.7)     | -47.7 to -23.3<br>(-47.7 to -23.3)            | 1.4 to 1.7<br>(1.4 to 1.7)          | 0.6 to 0.9<br>(0.6 to 0.9)     | -58.68 to -39.01<br>(-58.68 to -39.01) | 0.6 to 0.7<br>(0.6 to 0.7)     | 0.2 to 0.5<br>(0.2 to 0.5)     | -53.07 to -24.46<br>(-53.07 to -24.46)   | 2.1 to 2.6<br>(2.1 to 2.6)          | 0.9 to 1.3<br>(0.9 to 1.3)     | -63.86 to -24.46<br>(-63.86 to -24.46)   | 0.3 to 0.3<br>(0.3 to 0.3)     | 0.2 to 0.2<br>(0.2 to 0.2)     | 44.20 to -16.04<br>(44.20 to -16.04)       | 0.8 to 1.0<br>(0.8 to 1.0)          | 0.6 to 0.6<br>(0.6 to 0.6)     | 0.4 to 0.4<br>(0.4 to 0.4)             |         |  |  |  |  |  |
| <b>Tuberculosis</b>                                                      | 0.6 to 0.6<br>(0.5 to 0.6)     | 0.4 to 0.4<br>(0.3 to 0.4)     | -34.5 to -34.5<br>(-49.51 to -29.71)          | 0.9 to 0.9<br>(0.8 to 0.9)          | 0.4 to 0.4<br>(0.3 to 0.4)     | -50.8 to -50.8<br>(-64.64 to -37.01)   | 0.2 to 0.2<br>(0.2 to 0.2)     | 0.2 to 0.2<br>(0.1 to 0.2)     | -34.7 to -34.7<br>(-51.14 to -18.98)     | 1.3 to 1.3<br>(1.2 to 1.3)          | 0.6 to 0.6<br>(0.5 to 0.6)     | -54.4 to -54.4<br>(-65.44 to -45.95)     | 0.2 to 0.2<br>(0.2 to 0.2)     | 0.2 to 0.2<br>(0.1 to 0.2)     | -34.9 to -34.9<br>(-50.14 to -22.35)       | 0.6 to 0.6<br>(0.6 to 0.6)          | 0.2 to 0.2<br>(0.2 to 0.2)     | 0.4 to 0.4<br>(0.2 to 0.4)             |         |  |  |  |  |  |
| <b>HIV/AIDS</b>                                                          | 0.3 to 0.4<br>(0.3 to 0.4)     | 0.2 to 0.2<br>(0.2 to 0.2)     | -59.94 to -10.77<br>(-59.94 to -10.77)        | 0.5 to 0.8<br>(0.5 to 0.8)          | 0.3 to 0.5<br>(0.3 to 0.5)     | -64.62 to -26.37<br>(-64.62 to -26.37) | 0.2 to 0.3<br>(0.2 to 0.3)     | 0.2 to 0.2<br>(0.1 to 0.2)     | -63.86 to -35.69<br>(-63.86 to -35.69)   | 0.9 to 1.3<br>(0.9 to 1.3)          | 0.4 to 0.7<br>(0.4 to 0.7)     | -60.08 to -31.31<br>(-60.08 to -31.31)   | 0.1 to 0.1<br>(0.1 to 0.1)     | 0.1 to 0.1<br>(0.0 to 0.1)     | -47.51 to -31.72<br>(-47.51 to -31.72)     | 0.2 to 0.3<br>(0.2 to 0.3)          | 0.1 to 0.3<br>(0.1 to 0.3)     | 0.2 to 0.2<br>(0.1 to 0.2)             |         |  |  |  |  |  |
| <b>HIV/AIDS resulting in mycobacterial infection</b>                     | 0.0 to 0.0<br>(0.0 to 0.0)     | 0.0 to 0.0<br>(0.0 to 0.0)     | -74.51 to -42.40<br>(-74.51 to -42.40)        | 0.0 to 0.1<br>(0.0 to 0.1)          | 0.0 to 0.0<br>(0.0 to 0.0)     | -77.54 to -52.15<br>(-77.54 to -52.15) | 0.0 to 0.0<br>(0.0 to 0.0)     | 0.0 to 0.0<br>(0.0 to 0.0)     | -76.46 to -44.93<br>(-76.46 to -44.93)   | 0.1 to 0.1<br>(0.1 to 0.1)          | 0.0 to 0.0<br>(0.0 to 0.0)     | -75.65 to -54.30<br>(-75.65 to -54.30)   | 0.0 to 0.0<br>(0.0 to 0.0)     | 0.0 to 0.0<br>(0.0 to 0.0)     | 66.41 to -14.86<br>(66.41 to -14.86)       | 0.0 to 0.0<br>(0.0 to 0.0)          | 0.0 to 0.0<br>(0.0 to 0.0)     | 0.0 to 0.0<br>(0.0 to 0.0)             |         |  |  |  |  |  |
| <b>HIV/AIDS resulting in other diseases</b>                              | 0.3 to 0.4<br>(0.3 to 0.4)     | 0.2 to 0.2<br>(0.2 to 0.2)     | -44.9 to -44.9<br>(-63.45 to -26.33)          | 0.6 to 0.6<br>(0.5 to 0.7)          | 0.3 to 0.3<br>(0.2 to 0.4)     | -50.4 to -50.4<br>(-63.45 to -26.33)   | 0.1 to 0.1<br>(0.1 to 0.1)     | 0.1 to 0.1<br>(0.1 to 0.1)     | -41.0 to -41.0<br>(-63.45 to -26.33)     | 1.0 to 1.0<br>(0.8 to 1.2)          | 0.5 to 0.5<br>(0.3 to 0.7)     | -67.94 to -29.08<br>(-67.94 to -29.08)   | 0.1 to 0.1<br>(0.0 to 0.1)     | 0.1 to 0.1<br>(0.0 to 0.1)     | -46.26 to -34.53<br>(-46.26 to -34.53)     | 0.2 to 0.3<br>(0.2 to 0.3)          | 0.1 to 0.1<br>(0.1 to 0.1)     | 0.2 to 0.2<br>(0.2 to 0.2)             |         |  |  |  |  |  |
| <b>Diarrhea, lower respiratory, and other common infectious diseases</b> | 33.5 to 41.3<br>(31.5 to 41.3) | 36.2 to 44.6<br>(32.8 to 44.6) | 8.5 to 8.1<br>(4.2 to 15.0)                   | 44.8 to 55.0<br>(42.2 to 55.0)      | 34.2 to 41.5<br>(31.1 to 41.5) | -23.5 to -16.04<br>(-32.61 to -16.04)  | 12.5 to 14.6<br>(11.5 to 16.6) | 14.6 to 17.3<br>(12.9 to 17.3) | -25.9 to -20.56<br>(-32.01 to -14.32)    | 48.9 to 64.7<br>(45.0 to 64.7)      | 34.6 to 40.6<br>(30.6 to 40.6) | -29.9 to -20.56<br>(-40.16 to -10.96)    | 21.6 to 26.1<br>(19.5 to 26.1) | 21.6 to 24.6<br>(18.6 to 24.6) | -11.47 to -19.74<br>(-11.47 to -19.74)     | 41.9 to 43.4<br>(38.9 to 43.4)      | 33.5 to 39.1<br>(29.4 to 39.1) | 19.9 to 25.5<br>(10.94 to 25.5)        |         |  |  |  |  |  |
| <b>Diarrheal diseases</b>                                                | 0.2 to 0.2<br>(0.2 to 0.2)     | 1.5 to 2.0<br>(1.5 to 2.0)     | 652.23 to 912.10<br>(652.23 to 912.10)        | 0.3 to 0.3<br>(0.3 to 0.3)          | 1.5 to 2.0<br>(1.5 to 2.0)     | 384.73 to 458.60<br>(384.73 to 458.60) | 0.1 to 0.1<br>(0.1 to 0.1)     | 0.5 to 0.7<br>(0.5 to 0.7)     | 518.57 to 829.34<br>(518.57 to 829.34)   | 0.3 to 0.4<br>(0.3 to 0.4)          | 1.3 to 1.8<br>(1.3 to 1.8)     | 277.00 to 458.79<br>(277.00 to 458.79)   | 0.1 to 0.1<br>(0.1 to 0.1)     | 1.0 to 1.4<br>(1.0 to 1.4)     | 689.46 to 1,074.22<br>(689.46 to 1,074.22) | 0.3 to 0.3<br>(0.3 to 0.3)          | 1.6 to 2.2<br>(1.6 to 2.2)     | 440.48 to 679.52<br>(440.48 to 679.52) |         |  |  |  |  |  |
| <b>Intestinal infectious diseases</b>                                    | 0.1 to 0.1<br>(0.0 to 0.1)     | 0.1 to 0.1<br>(0.0 to 0.1)     | 5.6 to -12.07 to -41.88<br>(-12.07 to -41.88) | 0.1 to 0.1<br>(0.1 to 0.1)          | 0.0 to 0.0<br>(0.0 to 0.0)     | -19.73 to -31.70<br>(-19.73 to -31.70) | 0.0 to 0.0<br>(0.0 to 0.0)     | 0.0 to 0.0<br>(0.0 to 0.0)     | -10.86 to -17.65<br>(-10.86 to -17.65)   | 0.1 to 0.3<br>(0.1 to 0.3)          | 0.1 to 0.3<br>(0.1 to 0.3)     | -20.36 to -35.50<br>(-20.36 to -35.50)   | 0.0 to 0.1<br>(0.0 to 0.1)     | 0.0 to 0.1<br>(0.0 to 0.1)     | -18.29 to -42.79<br>(-18.29 to -42.79)     | 0.0 to 0.0<br>(0.0 to 0.0)          | 0.0 to 0.0<br>(0.0 to 0.0)     | 0.0 to 0.0<br>(-1.31 to 21.95)         |         |  |  |  |  |  |
| <b>Typhoid fever</b>                                                     | 0.0 to 0.1<br>(0.0 to 0.1)     | 0.0 to 0.1<br>(0.0 to 0.1)     | 1.19 to 40.51<br>(1.19 to 40.51)              | 0.0 to 0.2<br>(0.0 to 0.2)          | 0.0 to 0.2<br>(0.0 to 0.2)     | 9.44 to 30.10<br>(9.44 to 30.10)       | 0.0 to 0.1<br>(0.0 to 0.1)     | 0.0 to 0.1<br>(0.0 to 0.1)     | 1.04 to 64.28<br>(1.04 to 64.28)         | 0.0 to 0.3<br>(0.0 to 0.3)          | 0.0 to 0.3<br>(0.0 to 0.3)     | -9.59 to 51.55<br>(-9.59 to 51.55)       | 0.0 to 0.0<br>(0.0 to 0.0)     | 0.0 to 0.0<br>(0.0 to 0.0)     | -10.11 to 32.34<br>(-10.11 to 32.34)       | 0.0 to 0.2<br>(0.0 to 0.2)          | 0.0 to 0.2<br>(0.0 to 0.2)     | 0.0 to 0.2<br>(-1.86 to 21.33)         |         |  |  |  |  |  |
| <b>Paratyphoid fever</b>                                                 | 0.0 to 0.0<br>(0.0 to 0.0)     | 0.0 to 0.0<br>(0.0 to 0.0)     | 74.7 to 109.92<br>(42.53 to 109.92)           | 0.0 to 0.0<br>(0.0 to 0.0)          | 0.0 to 0.0<br>(0.0 to 0.0)     | 62.3 to 109.92<br>(30.71 to 109.92)    | 0.0 to 0.0<br>(0.0 to 0.0)     | 0.0 to 0.0<br>(0.0 to 0.0)     | 115.9 to 169.84<br>(62.33 to 169.84)     | 0.0 to 0.0<br>(0.0 to 0.0)          | 0.0 to 0.0<br>(0.0 to 0.0)     | 46.99 to 153.78<br>(46.99 to 153.78)     | 0.0 to 0.0<br>(0.0 to 0.0)     | 0.0 to 0.0<br>(0.0 to 0.0)     | 9.58 to 67.35<br>(9.58 to 67.35)           | 0.0 to 0.0<br>(0.0 to 0.0)          | 0.0 to 0.0<br>(0.0 to 0.0)     | 0.0 to 0.0<br>(1.44 to 57.57)          |         |  |  |  |  |  |
| <b>Other intestinal infectious diseases</b>                              | 0.0 to 0.0<br>(0.0 to 0.0)     | 0.0 to 0.0<br>(0.0 to 0.0)     | -85.47 to -62.09<br>(-85.47 to -62.09)        | 0.0 to 0.0<br>(0.0 to 0.0)          | 0.0 to 0.0<br>(0.0 to 0.0)     | -88.17 to -46.92<br>(-88.17 to -46.92) | 0.0 to 0.0<br>(0.0 to 0.0)     | 0.0 to 0.0<br>(0.0 to 0.0)     | -91.04 to -365.92<br>(-91.04 to -365.92) | 0.0 to 0.0<br>(0.0 to 0.0)          | 0.0 to 0.0<br>(0.0 to 0.0)     | -93.32 to -114.66<br>(-93.32 to -114.66) | 0.0 to 0.0<br>(0.0 to 0.0)     | 0.0 to 0.0<br>(0.0 to 0.0)     | -93.19 to -27.92<br>(-93.19 to -27.92)     | 0.0 to 0.0<br>(0.0 to 0.0)          | 0.0 to 0.0<br>(0.0 to 0.0)     | 0.0 to 0.0<br>(-4.79 to -191.08)       |         |  |  |  |  |  |
| <b>Lower respiratory infections</b>                                      | 30.6 to 40.3<br>(30.5 to 42.4) | 33.3 to 42.4<br>(30.5 to 42.4) | 8.36 to -18.88<br>(8.36 to -18.88)            | 41.0 to 53.2<br>(28.5 to 38.9)      | 31.7 to 41.0<br>(11.0 to 16.2) | -23.5 to -18.88<br>(-38.16 to 16.4)    | 11.7 to 14.4<br>(12.0 to 16.4) | 11.7 to 14.4<br>(4.1 to 16.2)  | -35.1 to -22.57<br>(-48.7 to 28.97)      | 31.1 to 37.7<br>(41.1 to 62.7)      | 21.6 to 28.3<br>(28.3 to 38.3) | -32.2 to -15.55<br>(-48.7 to 28.97)      | 11.5 to 15.5<br>(19.0 to 25.6) | 11.5 to 15.5<br>(17.3 to 27.2) | -15.87 to -15.55<br>(-15.87 to -15.55)     | 26.2 to 40.7<br>(26.2 to 40.7)      | 30.6 to 39.1<br>(26.2 to 39.1) | 19.9 to 25.5<br>(10.94 to 25.5)        |         |  |  |  |  |  |
| <b>Upper respiratory infections</b>                                      | 0.0 to 0.0<br>(0.0 to 0.0)     | 0.0 to 0.0<br>(0.0 to 0.0)     | -1.56 to 28.22<br>(-1.56 to 28.22)            | 0.0 to 0.0<br>(0.0 to 0.0)          | 0.0 to 0.0<br>(0.0 to 0.0)     | -4.57 to 35.58<br>(-4.57 to 35.58)     | 0.0 to 0.0<br>(0.0 to 0.0)     | 0.0 to 0.0<br>(0.0 to 0.0)     | -4.57 to 35.58<br>(-4.57 to 35.58)       | 0.0 to 0.0<br>(0.0 to 0.0)          | 0.0 to 0.0<br>(0.0 to 0.0)     | -7.12 to 31.31<br>(-7.12 to 31.31)       | 0.0 to 0.0<br>(0.0 to 0.0)     | 0.0 to 0.0<br>(0.0 to 0.0)     | -47.41 to 70.78<br>(-47.41 to 70.78)       | 0.0 to 0.0<br>(0.0 to 0.0)          | 0.0 to 0.0<br>(0.0 to 0.0)     | 0.0 to 0.0<br>(-70.28 to 12.7)         |         |  |  |  |  |  |
| <b>Orbits disease</b>                                                    | 0.0 to 0.0<br>(0.0 to 0.0)     | 0.0 to 0.0<br>(0.0 to 0.0)     | -61.89 to -55.55<br>(-61.89 to -55.55)        | 0.1 to 0.1<br>(0.1 to 0.1)          | 0.0 to 0.0<br>(0.0 to 0.0)     | -70.39 to -58.98<br>(-70.39 to -58.98) | 0.0 to 0.0<br>(0.0 to 0.0)     | 0.0 to 0.0<br>(0.0 to 0.0)     | -71.77 to -61.63<br>(-71.77 to -61.63)   | 0.1 to 0.1<br>(0.1 to 0.1)          | 0.0 to 0.0<br>(0.0 to 0.0)     | -77.70 to -68.13<br>(-77.70 to -68.13)   | 0.0 to 0.0<br>(0.0 to 0.0)     | 0.0 to 0.0<br>(0.0 to 0.0)     | -56.20 to -37.58<br>(-56.20 to -37.58)     | 0.0 to 0.1<br>(0.0 to 0.1)          | 0.0 to 0.0<br>(0.0 to 0.0)     | 0.0 to 0.0<br>(4.60 to -43.47)         |         |  |  |  |  |  |
| <b>Meningitis</b>                                                        | 0.4 to 0.5<br>(0.4 to 0.5)     | 0.3 to 0.3<br>(0.3 to 0.3)     | -50.68 to -27.55<br>(-50.68 to -27.55)        | 0.9 to 1.1<br>(0.9 to 1.1)          | 0.4 to 0.5<br>(0.4 to 0.5)     | -61.29 to -46.29<br>(-61.29 to -46.29) | 0.1 to 0.2<br>(0.1 to 0.2)     | 0.1 to 0.2<br>(0.1 to 0.2)     | -52.47 to -30.02<br>(-52.47 to -30.02)   | 0.9 to 1.3<br>(0.9 to 1.3)          | 0.4 to 0.6<br>(0.4 to 0.6)     | -62.54 to -47.38<br>(-62.54 to -47.38)   | 0.2 to 0.3<br>(0.2 to 0.3)     | 0.2 to 0.3<br>(0.2 to 0.3)     | -52.57 to -17.90<br>(-52.57 to -17.90)     | 0.7 to 0.9<br>(0.7 to 0.9)          | 0.3 to 0.5<br>(0.3 to 0.5)     | 0.0 to 0.0<br>(4.60 to -43.47)         |         |  |  |  |  |  |
| <b>Pneumococcal meningitis</b>                                           | 0.1 to 0.1<br>(0.1 to 0.1)     | 0.0 to 0.0<br>(0.0 to 0.0)     | -43.2 to 39.63<br>(-43.2 to 39.63)            | 0.2 to 0.2<br>(0.2 to 0.2)          | 0.1 to 0.1<br>(0.1 to 0.1)     | -55.4 to -41.93<br>(-55.4 to -41.93)   | 0.0 to 0.0<br>(0.0 to 0.0)     | 0.0 to 0.0<br>(0.0 to 0.0)     | -45.7 to -31.18<br>(-45.7 to -31.18)     | 0.2 to 0.2<br>(0.2 to 0.2)          | 0.1 to 0.1<br>(0.1 to 0.1)     | -57.9 to -43.26<br>(-57.9 to -43.26)     | 0.0 to 0.0<br>(0.0 to 0.0)     | 0.0 to 0.0<br>(0.0 to 0.0)     | -40.1 to -24.24<br>(-40.1 to -24.24)       | 0.1 to 0.2<br>(0.1 to 0.2)          | 0.1 to 0.1<br>(0.1 to 0.1)     | 0.0 to 0.0<br>(63.06 to 25.94)         |         |  |  |  |  |  |
| <b>H influenzae type B meningitis</b>                                    | 0.1 to 0.1<br>(0.1 to 0.1)     | 0.0 to 0.0<br>(0.0 to 0.0)     | -57.8 to -40.18<br>(-57.8 to -40.18)          | 0.2 to 0.2<br>(0.2 to 0.2)          | 0.1 to 0.1<br>(0.1 to 0.1)     | -65.28 to -50.09<br>(-65.28 to -50.09) | 0.0 to 0.1<br>(0.0 to 0.1)     | 0.0 to 0.0<br>(0.0 to 0.0)     | -55.65 to -36.63<br>(-55.65 to -36.63)   | 0.1 to 0.3<br>(0.1 to 0.3)          | 0.1 to 0.1<br>(0.1 to 0.1)     | -66.88 to -45.53<br>(-66.88 to -45.53)   | 0.0 to 0.0<br>(0.0 to 0.0)     | 0.0 to 0.0<br>(0.0 to 0.0)     | -45.73 to -39.11<br>(-45.73 to -39.11)     | 0.1 to 0.2<br>(0.1 to 0.2)          | 0.0 to 0.1<br>(0.0 to 0.1)     | 0.0 to 0.0<br>(46.28 to -49.3)         |         |  |  |  |  |  |
| <b>Meningococcal meningitis</b>                                          | 0.2 to 0.2<br>(0.2 to 0.2)     | 0.1 to 0.1<br>(0.1 to 0.1)     | -44.8 to -22.84<br>(-44.8 to -22.84)          | 0.3 to 0.3<br>(0.3 to 0.3)          | 0.1 to 0.2<br>(0.1 to 0.2)     | -65.39 to -43.75<br>(-65.39 to -43.75) | 0.1 to 0.1<br>(0.1 to 0.1)     | 0.1 to 0.1<br>(0.1 to 0.1)     | -54.11 to -25.16<br>(-54.11 to -25.16)   | 0.3 to 0.4<br>(0.3 to 0.4)          | 0.1 to 0.2<br>(0.1 to 0.2)     | -64.87 to -44.20<br>(-64.87 to -44.20)   | 0.1 to 0.1<br>(0.1 to 0.1)     | 0.1 to 0.1<br>(0.1 to 0.1)     | -43.62 to -12.32<br>(-43.62 to -12.32)     | 0.4 to 0.3<br>(0.4 to 0.3)          | 0.1 to 0.2<br>(0.1 to 0.2)     | 0.0 to 0.0<br>(46.28 to -49.3)         |         |  |  |  |  |  |
| <b>Other meningitis</b>                                                  | 0.2 to 0.2<br>(0.2 to 0.2)     | 0.1 to 0.1<br>(0.1 to 0.1)     | -44.5 to -25.06<br>(-44.5 to -25.06)          | 0.3 to 0.4<br>(0.3 to 0.4)          | 0.2 to 0.2<br>(0.2 to 0.2)     | -56.2 to -40.00<br>(-56.2 to -40.00)   | 0.1 to 0.1<br>(0.1 to 0.1)     | 0.1 to 0.1<br>(0.1 to 0.1)     | -44.3 to -34.29<br>(-44.3 to -34.29)     | 0.4 to 0.4<br>(0.4 to 0.4)          | 0.2 to 0.2<br>(0.2 to 0.2)     | -56.0 to -45.86<br>(-56.0 to -45.86)     | 0.1 to 0.1<br>(0.1 to 0.1)     | 0.1 to 0.1<br>(0.1 to 0.1)     | -44.6 to -21.10<br>(-44.6 to -21.10)       | 0.3 to 0.3<br>(0.3 to 0.3)          | 0.1 to 0.2<br>(0.1 to 0.2)     | 0.0 to 0.0<br>(46.00 to -40.54)        |         |  |  |  |  |  |
| <b>Encephalitis</b>                                                      | 0.1 to 0.1<br>(0.1 to 0.1)     | 0.1 to 0.1<br>(0.1 to 0.1)     | -32.22 to 78.39<br>(-32.22 to 78.39)          | 0.1 to 0.2<br>(0.1 to 0.2)          | 0.1 to 0.2<br>(0.1 to 0.2)     | -44.95 to 44.82<br>(-44.95 to 44.82)   | 0.0 to 0.1<br>(0.0 to 0.1)     | 0.0 to 0.1<br>(0.0 to 0.1)     | -35.58 to 74.12<br>(-35.58 to 74.12)     | 0.1 to 0.3<br>(0.1 to 0.3)          | 0.1 to 0.2<br>(0.1 to 0.2)     | -48.45 to 37.54<br>(-48.45 to 37.54)     | 0.0 to 0.1<br>(0.0 to 0.1)     | 0.0 to 0.1<br>(0.0 to 0.1)     | -30.91 to 90.98<br>(-30.91 to 90.98)       | 0.1 to 0.2<br>(0.1 to 0.2)          | 0.1 to 0.2<br>(0.1 to 0.2)     | 0.0 to 0.0<br>(41.34 to 19.38)         |         |  |  |  |  |  |
| <b>Diphtheria</b>                                                        | 0.0 to 0.0<br>(0.0 to 0.0)     | 0.0 to 0.0<br>(0.0 to 0.0)     | -80.41 to -21.00<br>(-80.41 to -21.00)        | 0.0 to 0.0<br>(0.0 to 0.0)          | 0.0 to 0.0<br>(0.0 to 0.0)     | -85.10 to -29.94<br>(-85.10 to -29.94) | 0.0 to 0.0<br>(0.0 to 0.0)     | 0.0 to 0.0<br>(0.0 to 0.0)     | -85.10 to -29.94<br>(-85.10 to -29.94)   | 0.0 to 0.0<br>(0.0 to 0.0)          | 0.0 to 0.0<br>(0.0 to 0.0)     | -85.10 to -29.94<br>(-85.10 to -29.94)   | 0.0 to 0.0<br>(0.0 to 0.0)     | 0.0 to 0.0<br>(0.0 to 0.0)     | -85.68 to 34.21<br>(-85.68 to 34.21)       |                                     |                                |                                        |         |  |  |  |  |  |





|                                                     |                        |                        |                            |                        |                        |                            |                         |                         |                             |                        |                        |                            |                         |                         |                            |                        |                         |                            |
|-----------------------------------------------------|------------------------|------------------------|----------------------------|------------------------|------------------------|----------------------------|-------------------------|-------------------------|-----------------------------|------------------------|------------------------|----------------------------|-------------------------|-------------------------|----------------------------|------------------------|-------------------------|----------------------------|
| Other pneumonococci                                 | 0.1<br>(0.1 to 0.2)    | 0.1<br>(0.1 to 0.2)    | 36.2<br>(53.0 to 14.55)    | 0.2<br>(0.1 to 0.3)    | 0.1<br>(0.1 to 0.1)    | 54.0<br>(66.57 to 39.76)   | 0.2<br>(0.1 to 0.2)     | 0.1<br>(0.1 to 0.2)     | 35.8<br>(55.48 to 10.44)    | 0.6<br>(0.4 to 0.8)    | 0.2<br>(0.1 to 0.2)    | 59.9<br>(72.20 to 44.77)   | <0.05<br>(0.0 to <0.05) | <0.05<br>(0.0 to <0.05) | -37.9<br>(-58.36 to 17.71) | 0.0<br>(0.0 to 0.1)    | <0.05<br>(0.0 to <0.05) | 51.5<br>(66.25 to 37.64)   |
| Asthma                                              | 1.1<br>(1.0 to 1.9)    | 1.5<br>(0.9 to 3.0)    | 15.2<br>(33.53 to 20.05)   | 2.5<br>(1.1 to 2.1)    | 1.5<br>(0.9 to 3.0)    | 39.5<br>(50.74 to 15.70)   | 0.7<br>(0.5 to 0.7)     | 0.3<br>(0.3 to 0.4)     | 48.2<br>(55.77 to 33.91)    | 2.5<br>(2.0 to 2.8)    | 1.0<br>(0.8 to 1.2)    | 41.8<br>(47.23 to 20.44)   | 0.9<br>(0.6 to 1.3)     | 1.9<br>(0.6 to 1.5)     | 5.8<br>(1.6 to 3.4)        | 0.0<br>(1.2 to 2.9)    | 0.9<br>(1.5 to 2.4)     | 22.2<br>(41.75 to 26.64)   |
| Interstitial lung disease and pulmonary sarcoidosis | 1.1<br>(0.9 to 2.3)    | 1.4<br>(1.5 to 1.3)    | 20.4<br>(1.36 to 390.44)   | 2.4<br>(1.2 to 2.9)    | 2.4<br>(1.6 to 2.5)    | 21.4<br>(23.70 to 262.36)  | 2.4<br>(0.6 to 1.5)     | 2.4<br>(0.8 to 2.8)     | 21.4<br>(11.43 to 334.65)   | 2.4<br>(2.3 to 5.3)    | 2.4<br>(2.0 to 6.8)    | 21.4<br>(39.61 to 192.71)  | 2.4<br>(0.2 to 0.9)     | 2.4<br>(0.4 to 2.5)     | 21.4<br>(5.44 to 965.07)   | 2.4<br>(0.6 to 2.1)    | 2.4<br>(0.8 to 4.4)     | 21.4<br>(14.54 to 400.46)  |
| Other chronic respiratory diseases                  | 1.9<br>(1.3 to 2.8)    | 0.2<br>(0.2 to 0.8)    | 91.6<br>(91.43 to 96.85)   | 2.5<br>(2.0 to 3.1)    | 0.8<br>(0.7 to 0.9)    | 91.6<br>(92.06 to 89.99)   | 0.2<br>(0.1 to 0.1)     | 0.1<br>(0.1 to 0.1)     | 91.6<br>(89.76 to 92.55)    | 0.2<br>(0.2 to 0.2)    | 0.1<br>(0.2 to 0.2)    | 91.6<br>(92.26 to 88.87)   | 0.2<br>(0.7 to 1.5)     | 0.1<br>(0.1 to 0.1)     | 91.6<br>(91.51 to 98.38)   | 0.2<br>(1.5 to 2.0)    | 0.1<br>(0.1 to 0.2)     | 91.6<br>(94.36 to 90.34)   |
| Cirrhosis                                           | 3.8<br>(3.0 to 4.0)    | 6.2<br>(6.2 to 7.1)    | 75.3<br>(60.46 to 83.56)   | 6.3<br>(6.1 to 6.5)    | 6.3<br>(6.3 to 6.5)    | 72.7<br>(81.71 to 51.08)   | 6.3<br>(6.1 to 6.5)     | 6.3<br>(6.3 to 6.5)     | 72.7<br>(84.95 to 117.38)   | 6.3<br>(7.3 to 7.6)    | 6.3<br>(6.6 to 12.5)   | 72.7<br>(47.02 to 67.87)   | 6.3<br>(1.8 to 2.0)     | 6.3<br>(5.0 to 5.6)     | 72.7<br>(27.02 to 33.27)   | 6.3<br>(5.0 to 5.6)    | 6.3<br>(5.7 to 6.9)     | 72.7<br>(8.69 to 137.27)   |
| Cirrhosis due to hepatitis B                        | 0.4<br>(0.0 to 0.5)    | 0.7<br>(0.0 to 0.8)    | 75.3<br>(95.01 to 114.75)  | 0.7<br>(0.0 to 0.8)    | 0.7<br>(0.0 to 0.8)    | 75.3<br>(92.72 to 74.01)   | 0.7<br>(0.1 to 0.1)     | 0.7<br>(0.1 to 0.1)     | 75.3<br>(87.95 to 117.58)   | 0.7<br>(0.6 to 1.0)    | 0.7<br>(0.8 to 1.1)    | 75.3<br>(41.10 to 63.51)   | 0.7<br>(0.2 to 0.3)     | 0.7<br>(0.3 to 0.5)     | 75.3<br>(24.58 to 93.96)   | 0.7<br>(0.6 to 0.7)    | 0.7<br>(0.6 to 1.1)     | 75.3<br>(13.18 to 117.40)  |
| Cirrhosis due to hepatitis C                        | 1.4<br>(1.0 to 1.6)    | 3.1<br>(2.8 to 3.5)    | 90.1<br>(90.1 to 151.89)   | 2.3<br>(2.1 to 2.6)    | 2.3<br>(1.7 to 4.0)    | 154.4<br>(54.16 to 105.41) | 2.3<br>(0.6 to 0.8)     | 2.3<br>(1.4 to 2.0)     | 154.4<br>(104.28 to 211.90) | 2.3<br>(2.0 to 2.3)    | 2.3<br>(4.1 to 5.6)    | 154.4<br>(57.11 to 142.08) | 2.3<br>(0.6 to 0.9)     | 2.3<br>(1.2 to 1.6)     | 154.4<br>(52.01 to 193.88) | 2.3<br>(1.8 to 2.6)    | 2.3<br>(3.0 to 4.1)     | 154.4<br>(28.22 to 100.68) |
| Cirrhosis due to alcohol use                        | 1.6<br>(1.6 to 1.9)    | 2.1<br>(1.8 to 2.4)    | 74.8<br>(1.87 to 40.16)    | 2.1<br>(2.5 to 3.0)    | 2.1<br>(1.7 to 4.0)    | 74.8<br>(16.73 to 15.35)   | 2.1<br>(0.8 to 1.1)     | 2.1<br>(1.3 to 1.9)     | 74.8<br>(35.44 to 101.86)   | 2.1<br>(1.1 to 4.0)    | 2.1<br>(1.7 to 2.2)    | 74.8<br>(32.13 to 53.72)   | 2.1<br>(0.6 to 0.9)     | 2.1<br>(0.4 to 0.6)     | 74.8<br>(47.97 to 17.68)   | 2.1<br>(1.7 to 2.3)    | 2.1<br>(0.9 to 1.4)     | 74.8<br>(-57.55 to 158.60) |
| Cirrhosis due to other causes                       | 0.3<br>(0.3 to 0.4)    | 0.7<br>(0.0 to 0.7)    | 142.3<br>(90.24 to 191.40) | 0.5<br>(0.3 to 0.6)    | 0.5<br>(0.3 to 0.6)    | 109.2<br>(58.28 to 140.22) | 0.2<br>(0.1 to 0.2)     | 0.2<br>(0.1 to 0.1)     | 109.2<br>(97.73 to 203.31)  | 0.6<br>(0.5 to 0.7)    | 1.3<br>(1.0 to 1.6)    | 116.6<br>(58.49 to 208.76) | 0.2<br>(0.1 to 0.2)     | 0.2<br>(0.3 to 0.4)     | 116.6<br>(47.80 to 195.04) | 0.2<br>(0.4 to 0.6)    | 0.2<br>(0.7 to 1.1)     | 116.6<br>(25.67 to 147.18) |
| Digestive diseases                                  | 13.3<br>(12.6 to 15.2) | 16.5<br>(14.7 to 20.4) | 23.5<br>(8.30 to 52.13)    | 18.2<br>(17.3 to 20.8) | 18.2<br>(14.7 to 20.1) | 23.5<br>(21.15 to 9.20)    | 18.2<br>(8.6 to 5.8)    | 18.2<br>(8.6 to 5.8)    | 23.5<br>(8.59 to 85.77)     | 18.2<br>(16.7 to 21.3) | 18.2<br>(14.1 to 22.7) | 23.5<br>(28.25 to 20.95)   | 18.2<br>(7.5 to 9.8)    | 18.2<br>(8.8 to 12.1)   | 23.5<br>(0.08 to 38.60)    | 18.2<br>(16.0 to 20.9) | 18.2<br>(13.8 to 19.8)  | 23.5<br>(22.32 to 7.07)    |
| Peptic ulcer disease                                | 4.2<br>(3.4 to 4.8)    | 3.1<br>(2.5 to 4.6)    | 24.7<br>(39.47 to 12.49)   | 3.1<br>(1.1 to 2.7)    | 3.1<br>(4.7 to 6.6)    | 44.9<br>(55.20 to 20.21)   | 1.9<br>(1.1 to 2.7)     | 1.9<br>(1.1 to 2.7)     | 44.9<br>(35.62 to 55.22)    | 1.9<br>(5.3 to 8.0)    | 1.9<br>(2.7 to 6.3)    | 44.9<br>(1.8 to 2.9)       | 1.9<br>(1.8 to 2.9)     | 44.9<br>(1.2 to 2.4)    | 44.9<br>(58.98 to 0.16)    | 1.9<br>(3.8 to 6.2)    | 1.9<br>(2.0 to 3.8)     | 44.9<br>(-57.69 to 19.12)  |
| Gastritis and duodenitis                            | 0.1<br>(0.1 to 0.2)    | 0.2<br>(0.1 to 0.3)    | 86.3<br>(21.00 to 139.97)  | 0.2<br>(0.1 to 0.3)    | 0.2<br>(0.1 to 0.3)    | 37.7<br>(10.21 to 78.70)   | <0.05<br>(0.0 to <0.05) | <0.05<br>(0.0 to <0.05) | 117.4<br>(67.70 to 225.72)  | 0.2<br>(0.1 to 0.2)    | 0.3<br>(0.1 to 0.4)    | 50.0<br>(18.25 to 122.04)  | 0.1<br>(0.0 to 0.1)     | 0.1<br>(0.0 to 0.2)     | 86.3<br>(6.38 to 108.11)   | 0.1<br>(0.1 to 0.3)    | 0.1<br>(0.1 to 0.3)     | 86.3<br>(15.81 to 60.23)   |
| Appendicitis                                        | 0.2<br>(0.2 to 0.3)    | 0.3<br>(0.2 to 0.5)    | 12.3<br>(36.37 to 110.58)  | 0.3<br>(0.3 to 0.4)    | 0.3<br>(0.2 to 0.5)    | 12.3<br>(51.91 to 42.86)   | 0.3<br>(0.1 to 0.1)     | 0.3<br>(0.1 to 0.3)     | 12.3<br>(33.67 to 195.43)   | 0.4<br>(0.2 to 0.5)    | 0.4<br>(0.2 to 0.7)    | 12.3<br>(53.83 to 90.52)   | 0.4<br>(0.1 to 0.2)     | 0.4<br>(0.1 to 0.2)     | 12.3<br>(48.81 to 60.57)   | 0.4<br>(0.2 to 0.5)    | 0.4<br>(0.1 to 0.4)     | 12.3<br>(-58.17 to 16.48)  |
| Paralytic ileus and intestinal obstruction          | 0.9<br>(0.9 to 2.0)    | 2.2<br>(1.2 to 2.9)    | 74.8<br>(7.79 to 116.52)   | 2.2<br>(1.2 to 2.7)    | 2.2<br>(1.2 to 2.7)    | 74.8<br>(21.02 to 57.88)   | 2.2<br>(0.3 to 0.8)     | 2.2<br>(0.4 to 1.2)     | 74.8<br>(14.98 to 171.42)   | 2.2<br>(1.2 to 3.1)    | 2.2<br>(0.9 to 2.9)    | 74.8<br>(45.05 to 72.44)   | 2.2<br>(0.5 to 1.4)     | 2.2<br>(0.6 to 2.0)     | 74.8<br>(12.19 to 98.77)   | 2.2<br>(1.0 to 2.9)    | 2.2<br>(1.1 to 3.2)     | 74.8<br>(-10.33 to 56.66)  |
| Inguinal, femoral, and abdominal hernia             | 0.7<br>(0.5 to 1.1)    | 0.2<br>(0.4 to 2.3)    | 24.8<br>(42.48 to 281.06)  | 1.0<br>(0.7 to 1.4)    | 1.0<br>(0.8 to 2.1)    | 24.8<br>(58.56 to 174.52)  | 0.3<br>(0.2 to 0.4)     | 0.3<br>(0.1 to 1.4)     | 24.8<br>(48.66 to 509.96)   | 1.1<br>(0.6 to 1.6)    | 1.0<br>(0.3 to 1.9)    | 24.8<br>(47.30 to 281.95)  | 0.4<br>(0.2 to 0.7)     | 0.4<br>(0.2 to 1.1)     | 24.8<br>(40.42 to 184.23)  | 0.4<br>(0.5 to 1.5)    | 0.4<br>(0.1 to 0.8)     | 24.8<br>(-67.93 to 120.23) |
| Inflammatory bowel disease                          | 0.9<br>(0.9 to 1.2)    | 0.9<br>(0.9 to 1.7)    | 11.79<br>(11.79 to 70.39)  | 0.9<br>(0.9 to 1.7)    | 0.9<br>(0.9 to 1.7)    | 11.79<br>(18.45 to 22.65)  | 0.9<br>(0.3 to 0.7)     | 0.9<br>(0.3 to 0.7)     | 11.79<br>(10.37 to 129.18)  | 0.9<br>(0.8 to 1.5)    | 0.9<br>(0.7 to 1.0)    | 11.79<br>(38.95 to 50.51)  | 0.9<br>(0.4 to 0.9)     | 0.9<br>(0.5 to 1.2)     | 11.79<br>(1.00 to 61.42)   | 0.9<br>(0.9 to 1.9)    | 0.9<br>(0.9 to 2.0)     | 11.79<br>(-18.59 to 21.89) |
| Vascular intestinal diseases                        | 1.4<br>(1.0 to 2.5)    | 2.3<br>(1.3 to 3.9)    | 24.8<br>(4.79 to 120.00)   | 2.3<br>(1.4 to 3.4)    | 2.3<br>(1.5 to 3.9)    | 24.8<br>(21.95 to 61.61)   | 2.3<br>(0.3 to 1.2)     | 2.3<br>(0.3 to 1.8)     | 24.8<br>(7.79 to 210.93)    | 2.3<br>(1.0 to 4.4)    | 2.3<br>(0.8 to 4.5)    | 24.8<br>(38.19 to 105.27)  | 2.3<br>(0.6 to 1.9)     | 2.3<br>(0.7 to 1.6)     | 24.8<br>(12.10 to 40.4)    | 2.3<br>(1.2 to 4.0)    | 2.3<br>(1.2 to 4.0)     | 24.8<br>(-20.73 to 68.15)  |
| Gallbladder and biliary diseases                    | 0.9<br>(0.8 to 1.2)    | 1.8<br>(1.3 to 2.1)    | 97.51<br>(97.51 to 146.97) | 1.2<br>(1.0 to 1.6)    | 1.2<br>(1.2 to 1.7)    | 39.9<br>(9.07 to 77.04)    | 0.3<br>(0.3 to 0.4)     | 0.3<br>(0.4 to 0.9)     | 116.5<br>(4.30 to 189.81)   | 1.2<br>(1.0 to 1.6)    | 1.2<br>(0.9 to 2.1)    | 97.51<br>(27.39 to 84.97)  | 1.2<br>(0.5 to 0.8)     | 1.2<br>(0.7 to 1.3)     | 97.51<br>(13.87 to 139.91) | 1.2<br>(1.0 to 1.7)    | 1.2<br>(1.1 to 2.1)     | 97.51<br>(-13.60 to 65.01) |
| Pancreatitis                                        | 0.5<br>(0.4 to 1.1)    | 0.5<br>(0.8 to 1.5)    | 27.2<br>(0.12 to 73.09)    | 0.5<br>(0.4 to 1.6)    | 0.5<br>(0.9 to 1.7)    | 27.2<br>(24.49 to 26.38)   | 0.5<br>(0.3 to 0.5)     | 0.5<br>(0.3 to 0.8)     | 27.2<br>(0.86 to 91.42)     | 0.5<br>(0.1 to 2.0)    | 0.5<br>(0.2 to 2.0)    | 27.2<br>(26.63 to 35.50)   | 0.5<br>(0.3 to 0.7)     | 0.5<br>(0.3 to 0.8)     | 27.2<br>(13.28 to 73.92)   | 0.5<br>(0.8 to 1.6)    | 0.5<br>(0.6 to 1.5)     | 27.2<br>(-10.58 to 34.45)  |
| Other digestive diseases                            | 2.5<br>(2.3 to 3.0)    | 3.3<br>(2.7 to 3.9)    | 29.2<br>(27.77 to 98.24)   | 3.2<br>(2.9 to 4.0)    | 3.2<br>(2.7 to 4.0)    | 29.2<br>(27.77 to 98.24)   | 3.2<br>(2.9 to 4.0)     | 3.2<br>(2.9 to 4.0)     | 29.2<br>(27.77 to 98.24)    | 3.2<br>(2.9 to 4.0)    | 3.2<br>(2.9 to 4.0)    | 29.2<br>(27.77 to 98.24)   | 3.2<br>(2.9 to 4.0)     | 3.2<br>(2.9 to 4.0)     | 29.2<br>(27.77 to 98.24)   | 3.2<br>(2.9 to 4.0)    | 3.2<br>(2.9 to 4.0)     | 29.2<br>(27.77 to 98.24)   |
| Neurological disorders                              | 34.5<br>(31.6 to 37.6) | 49.9<br>(45.6 to 53.8) | 44.8<br>(29.46 to 59.43)   | 45.4<br>(41.8 to 49.3) | 45.4<br>(41.8 to 49.3) | 44.8<br>(7.08 to 13.31)    | 45.4<br>(12.3 to 14.8)  | 45.4<br>(12.3 to 14.8)  | 44.8<br>(46.72 to 88.40)    | 45.4<br>(48.4 to 58.1) | 45.4<br>(47.5 to 57.7) | 44.8<br>(12.28 to 12.56)   | 45.4<br>(18.3 to 23.7)  | 45.4<br>(24.1 to 30.7)  | 44.8<br>(13.39 to 52.75)   | 45.4<br>(36.4 to 46.2) | 45.4<br>(37.7 to 47.2)  | 44.8<br>(-11.19 to 10.11)  |
| Alzheimer disease and other dementias               | 27.1<br>(24.4 to 30.1) | 41.1<br>(37.2 to 44.8) | 44.8<br>(32.51 to 70.58)   | 41.1<br>(31.2 to 38.2) | 41.1<br>(33.4 to 30.8) | 44.8<br>(6.42 to 20.11)    | 41.1<br>(8.7 to 11.6)   | 41.1<br>(8.7 to 11.6)   | 44.8<br>(54.59 to 112.46)   | 41.1<br>(34.5 to 43.9) | 41.1<br>(35.5 to 44.8) | 44.8<br>(31.83 to 20.95)   | 41.1<br>(14.7 to 20.1)  | 41.1<br>(20.4 to 26.6)  | 44.8<br>(12.65 to 65.86)   | 41.1<br>(27.4 to 38.9) | 41.1<br>(30.1 to 38.9)  | 44.8<br>(-10.58 to 34.45)  |
| Parkinson disease                                   | 3.4<br>(2.8 to 3.9)    | 4.4<br>(3.5 to 4.9)    | 26.9<br>(15.40 to 49.4)    | 4.4<br>(3.5 to 4.9)    | 4.4<br>(3.5 to 4.9)    | 26.9<br>(16.74 to 20.23)   | 4.4<br>(3.5 to 4.9)     | 4.4<br>(3.5 to 4.9)     | 26.9<br>(22.24 to 61.22)    | 4.4<br>(3.5 to 4.9)    | 4.4<br>(3.5 to 4.9)    | 26.9<br>(15.40 to 49.4)    | 4.4<br>(1.1 to 1.9)     | 4.4<br>(1.2 to 2.1)     | 26.9<br>(8.11 to 24.58)    | 4.4<br>(2.2 to 8.0)    | 4.4<br>(1.5 to 5.5)     | 26.9<br>(-24.34 to 30.46)  |
| Epilepsy                                            | 0.6<br>(0.7 to 1.0)    | 0.8<br>(0.6 to 0.9)    | 19.2<br>(21.45 to 17.80)   | 1.5<br>(1.4 to 1.9)    | 1.5<br>(1.0 to 1.5)    | 19.2<br>(34.76 to 5.13)    | 0.5<br>(0.4 to 0.6)     | 0.5<br>(0.3 to 0.6)     | 19.2<br>(22.46 to 21.02)    | 0.5<br>(0.5 to 2.3)    | 0.5<br>(1.5 to 2.4)    | 19.2<br>(3.05 to 1.5)      | 0.5<br>(0.3 to 0.5)     | 0.5<br>(0.2 to 0.4)     | 19.2<br>(36.21 to 2.76)    | 0.5<br>(1.0 to 1.5)    | 0.5<br>(0.7 to 1.2)     | 19.2<br>(-42.65 to 2.91)   |
| Multiple sclerosis                                  | 0.8<br>(0.5 to 1.2)    | 0.8<br>(0.6 to 1.2)    | 19.2<br>(22.09 to 35.42)   | 0.8<br>(0.9 to 2.0)    | 0.8<br>(0.8 to 1.6)    | 19.2<br>(37.44 to 8.62)    | 0.8<br>(0.2 to 0.5)     | 0.8<br>(0.1 to 0.5)     | 19.2<br>(47.52 to 42.98)    | 0.8<br>(0.6 to 1.8)    | 0.8<br>(0.4 to 1.5)    | 19.2<br>(58.99 to 9.77)    | 0.8<br>(0.3 to 0.8)     | 0.8<br>(0.3 to 0.8)     | 19.2<br>(-33.20 to 41.18)  | 0.8<br>(1.0 to 2.4)    | 0.8<br>(0.8 to 2.2)     | 19.2<br>(-43.56 to 14.43)  |
| Other neurological disorders                        | 2.3<br>(2.0 to 3.0)    | 2.7<br>(2.2 to 3.0)    | 18.4<br>(9.01 to 26.59)    | 3.7<br>(3.2 to 3.8)    | 3.7<br>(3.2 to 3.8)    | 18.4<br>(14.07 to 6.07)    | 3.7<br>(3.2 to 3.8)     | 3.7<br>(3.2 to 3.8)     | 18.4<br>(14.07 to 6.07)     | 3.7<br>(3.2 to 3.8)    | 3.7<br>(3.2 to 3.8)    | 18.4<br>(14.07 to 6.07)    | 3.7<br>(3.2 to 3.8)     | 3.7<br>(3.2 to 3.8)     | 18.4<br>(14.07 to 6.07)    | 3.7<br>(3.2 to 3.8)    | 3.7<br>(3.2 to 3.8)     | 18.4<br>(14.07 to 6.07)    |
| Mental and substance use disorders                  | 1.0<br>(1.0 to 1.6)    | 2.2<br>(1.7 to 2.4)    | 86.2<br>(10.21 to 110.72)  | 2.2<br>(2.0 to 3.0)    | 2.2<br>(2.0 to 3.0)    | 86.2<br>(1.38 to 93.91)    | 2.2<br>(0.7 to 1.1)     | 2.2<br>(0.7 to 1.1)     | 86.2<br>(10.08 to 151.89)   | 2.2<br>(1.7 to 4.5)    | 2.2<br>(1.7 to 6.4)    | 86.2<br>(11.92 to 125.96)  | 2.2<br>(0.3 to 0.6)     | 2.2<br>(0.5 to 0.8)     | 86.2<br>(11.68 to 39.39)   | 2.2<br>(1.2 to 2.0)    | 2.2<br>(1.5 to 2.4)     | 86.2<br>(6.90 to 20.39)    |
| Schizophrenia                                       | 0.1<br>(0.1 to 0.1)    | 0.1<br>(0.1 to 0.1)    | 86.2<br>(53.33 to 64.01)   | 0.1<br>(0.1 to 0.2)    | 0.1<br>(0.1 to 0.1)    | 86.2<br>(64.91 to 21.85)   | 0.1<br>(0.0 to 0.1)     | 0.1<br>(0.0 to 0.05)    | 86.2<br>(63.98 to 25.45)    | 0.1<br>(0.0 to 0.1)    | 0.1<br>(0.0 to 0.1)    | 86.2<br>(75.00 to 14.01)   | 0.1<br>(0.0 to 0.1)     | 0.1<br>(0.0 to 0.1)     | 86.2<br>(51.68 to 8.20)    | 0.1<br>(0.1 to 0.2)    | 0.1<br>(0.1 to 0.1)     | 86.2<br>(40.20 to 16.74)   |
| Alcohol use disorders                               | 0.4<br>(0.3 to 0.7)    | 0.6<br>(0.3 to 0.8)    | 26.9<br>(21.06 to 84.07)   | 0.6<br>(0.6 to 1.2)    | 0.6<br>(0.5 to 1.2)    | 26.9<br>(35.39 to 50.97)   | 0.6<br>(0.2 to 0.5)     | 0.6<br>(0.2 to 0.5)     | 26.9<br>(34.15 to 104.91)   | 0.6<br>(0.8 to 1.8)    | 0.6<br>(0.5 to 1.6)    | 26.9<br>(45.52 to 65.80)   | 0.6<br>(0.1 to 0.9)     | 0.6<br>(0.1 to 0.4)     | 26.9<br>(4.47 to 79.07)    | 0.6<br>(0.3 to 1.1)    | 0.6<br>(0.3 to 1.2)     | 26.9<br>(-20.99 to 86.96)  |
| Drug use disorders                                  | 0.6<br>(0.6 to 0.9)    | 0.6<br>(1.1 to 1.6)    | 13.5<br>(6.99 to 143.31)   | 0.6<br>(1.2 to 1.8)    | 0.6<br>(1.2 to 1.8)    | 13.5<br>(6.99 to 143.31)   | 0.6<br>(0.4 to 1.3)     | 0.6<br>(0.4 to 1.3)     | 13.5<br>(4.17 to 207.61)    | 0.6<br>(1.7 to 2.8)    | 0.6<br>(1.0 to 4.9)    | 13.5<br>(10.28 to 182.56)  | 0.6<br>(0.2 to 0.2)     | 0.6<br>(0.3 to 0.4)     | 13.5<br>(43.82 to 101.45)  | 0.6<br>(0.7 to         |                         |                            |

|                                       |                         |                         |                              |                         |                         |                            |                         |                         |                             |                         |                         |                           |                         |                         |                            |                         |                         |                             |
|---------------------------------------|-------------------------|-------------------------|------------------------------|-------------------------|-------------------------|----------------------------|-------------------------|-------------------------|-----------------------------|-------------------------|-------------------------|---------------------------|-------------------------|-------------------------|----------------------------|-------------------------|-------------------------|-----------------------------|
| Rheumatoid arthritis                  | 1.3<br>(0.6 to 1.6)     | 0.7<br>(0.0 to 0.9)     | 40.0<br>(52.0 to 29.29)      | 1.7<br>(1.4 to 1.9)     | 0.8<br>(0.0 to 0.8)     | 54.6<br>(64.10 to 46.20)   | 0.2<br>(0.2 to 0.2)     | 0.2<br>(0.0 to 0.3)     | -18.4<br>(-60.0 to 54)      | 0.8<br>(0.6 to 1.1)     | 0.5<br>(0.2 to 0.5)     | 43.2<br>(71.74 to 55.52)  | 1.0<br>(0.8 to 1.1)     | 0.6<br>(0.4 to 0.7)     | 44.8<br>(60.74 to 30.31)   | 2.3<br>(1.8 to 2.5)     | 1.0<br>(0.7 to 1.2)     | 55.6<br>(68.10 to 44.50)    |
| Other musculoskeletal disorders       | 0.7<br>(0.6 to 0.9)     | 0.5<br>(0.0 to 1.1)     | 34.5<br>(30.40 to 61.42)     | 1.0<br>(1.0 to 1.4)     | 1.0<br>(0.7 to 1.2)     | 10<br>(45.13 to 17.56)     | 0.3<br>(0.2 to 0.4)     | 0.3<br>(0.2 to 0.4)     | 33.7<br>(33.43 to 73.70)    | 0.9<br>(0.7 to 1.4)     | 0.5<br>(0.5 to 1.1)     | 7.0<br>(50.95 to 15.42)   | 0.6<br>(0.4 to 0.6)     | 0.6<br>(0.3 to 0.7)     | 55.8<br>(45.41 to 65.01)   | 1.2<br>(1.1 to 1.5)     | 1.2<br>(0.7 to 1.5)     | 0.8<br>(51.68 to 22.60)     |
| Other non-communicable diseases       | 3.5<br>(3.6 to 4.1)     | 1.6<br>(3.2 to 4.0)     | 5.8<br>(18.80 to 3.20)       | 5.8<br>(8.1 to 9.5)     | 28.6<br>(5.2 to 6.8)    | 31.1<br>(43.87 to 22.78)   | 1.2<br>(1.7 to 2.0)     | 1.2<br>(1.3 to 1.7)     | 21.0<br>(30.95 to 3.32)     | 6.2<br>(8.4 to 10.1)    | 3.8<br>(5.0 to 6.7)     | 29.7<br>(48.41 to 25.67)  | 1.0<br>(1.8 to 2.2)     | 0.8<br>(1.7 to 2.3)     | 31.1<br>(31.31 to 36.99)   | 8.3<br>(5.0 to 6.9)     | 5.8<br>(7.3 to 10.2)    | 30.2<br>(40.31 to 17.33)    |
| Congenital anomalies                  | 2.3<br>(2.2 to 2.5)     | 1.6<br>(1.4 to 1.9)     | 37.6<br>(37.43 to 17.77)     | 3.6<br>(5.3 to 6.2)     | 3.6<br>(3.1 to 4.2)     | 28.6<br>(46.42 to 26.22)   | 1.2<br>(1.2 to 1.3)     | 1.2<br>(0.7 to 1.0)     | 3.8<br>(38.46 to 18.28)     | 6.2<br>(5.8 to 6.7)     | 3.8<br>(3.2 to 4.6)     | 29.7<br>(47.30 to 26.72)  | 1.0<br>(1.0 to 1.2)     | 0.8<br>(0.7 to 0.9)     | 31.1<br>(38.32 to 14.31)   | 8.3<br>(4.9 to 5.9)     | 5.8<br>(2.8 to 4.1)     | 30.2<br>(47.34 to 25.01)    |
| Neural tube defects                   | 0.1<br>(0.0 to 0.2)     | 0.1<br>(0.0 to 0.1)     | 0.7<br>(65.81 to 40.34)      | 0.7<br>(0.3 to 0.4)     | 0.7<br>(0.0 to 0.5)     | 0.7<br>(67.80 to 30.72)    | 0.1<br>(0.0 to 0.1)     | 0.1<br>(0.0 to 0.0)     | 0.1<br>(64.01 to 30.72)     | 0.2<br>(0.2 to 0.4)     | 0.1<br>(0.1 to 0.2)     | 0.1<br>(65.99 to 33.07)   | 0.1<br>(0.1 to 0.1)     | 0.1<br>(0.0 to 0.5)     | 0.1<br>(64.01 to 33.07)    | 0.1<br>(0.4 to 0.5)     | 0.1<br>(0.1 to 0.3)     | 0.1<br>(49.78 to 25.01)     |
| Congenital heart anomalies            | 1.2<br>(1.1 to 1.3)     | 0.4<br>(0.6 to 0.7)     | 45<br>(52.72 to 38.46)       | 2.3<br>(2.8 to 3.1)     | 1.1<br>(1.7 to 1.6)     | 51.8<br>(58.55 to 44.10)   | 0.6<br>(0.6 to 0.7)     | 0.3<br>(0.4 to 0.4)     | 12.3<br>(54.61 to 19.98)    | 1.2<br>(2.9 to 1.6)     | 1.5<br>(1.3 to 1.8)     | 34.1<br>(40.08 to 34.51)  | 0.3<br>(0.5 to 1.0)     | 0.3<br>(0.3 to 0.4)     | 44.9<br>(53.28 to 34.89)   | 2.6<br>(2.4 to 2.9)     | 1.8<br>(1.1 to 1.6)     | 50.4<br>(58.91 to 41.42)    |
| Cleft lip and cleft palate            | <0.05<br>(0.0 to <0.05) | <0.05<br>(0.0 to <0.05) | <0.05<br>(90.83 to 39.83)    | <0.05<br>(0.0 to <0.05) | <0.05<br>(0.0 to <0.05) | <0.05<br>(91.07 to 41.23)  | <0.05<br>(0.0 to <0.05) | <0.05<br>(0.0 to <0.05) | <0.05<br>(93.34 to 24.82)   | <0.05<br>(0.0 to <0.05) | <0.05<br>(0.0 to <0.05) | <0.05<br>(93.51 to 26.44) | <0.05<br>(0.0 to <0.05) | <0.05<br>(0.0 to <0.05) | <0.05<br>(40.98 to 38.33)  | <0.05<br>(0.0 to <0.05) | <0.05<br>(0.0 to <0.05) | <0.05<br>(49.19 to 19.82)   |
| Down syndrome                         | 0.1<br>(0.1 to 0.2)     | 0.1<br>(0.1 to 0.2)     | 1.2<br>(6.54 to 32.80)       | 0.1<br>(0.2 to 0.4)     | 0.1<br>(0.0 to 0.1)     | 1.2<br>(24.46 to 59.19)    | 0.1<br>(0.0 to 0.1)     | 0.1<br>(0.0 to 0.1)     | 0.1<br>(30.77 to 94.05)     | 0.2<br>(0.2 to 0.4)     | 0.1<br>(0.0 to 0.4)     | 0.1<br>(44.19 to 59.75)   | 0.1<br>(0.1 to 0.1)     | 0.1<br>(0.2 to 0.4)     | 0.1<br>(23.07 to 101.23)   | 0.1<br>(0.2 to 0.4)     | 0.1<br>(0.1 to 0.3)     | 0.1<br>(48.14 to 66.93)     |
| Chromosomal unbalanced rearrangements | 0.1<br>(0.1 to 0.1)     | 0.1<br>(0.1 to 0.1)     | 9.8<br>(22.08 to 47.74)      | 0.2<br>(0.2 to 0.3)     | 0.2<br>(0.2 to 0.3)     | 6.2<br>(26.05 to 43.96)    | <0.05<br>(0.0 to <0.05) | <0.05<br>(0.0 to <0.05) | 19.4<br>(28.31 to 4.08)     | 0.2<br>(0.1 to 0.3)     | 0.2<br>(0.1 to 0.3)     | 15.0<br>(31.59 to 16.68)  | 0.1<br>(0.0 to 0.1)     | 0.1<br>(0.0 to 0.1)     | 4.5<br>(29.04 to 42.74)    | 0.2<br>(0.2 to 0.5)     | 0.4<br>(0.2 to 0.4)     | 1.4<br>(32.15 to 39.35)     |
| Other congenital anomalies            | 0.8<br>(0.7 to 0.8)     | 0.7<br>(0.6 to 0.8)     | 2.0<br>(27.74 to 1.89)       | 1.4<br>(1.9 to 2.2)     | 1.4<br>(1.2 to 1.8)     | 26.4<br>(39.38 to 10.12)   | 0.3<br>(0.4 to 0.5)     | 0.3<br>(0.3 to 0.5)     | 1.4<br>(29.14 to 4.50)      | 0.2<br>(2.1 to 2.5)     | 0.2<br>(1.4 to 2.1)     | 0.2<br>(39.29 to 4.38)    | 0.3<br>(0.3 to 0.4)     | 0.3<br>(0.2 to 0.4)     | 1.3<br>(29.74 to 1.04)     | 1.3<br>(1.5 to 2.0)     | 1.3<br>(1.0 to 1.6)     | 1.7<br>(42.66 to 9.04)      |
| Skin and subcutaneous diseases        | 0.8<br>(0.8 to 1.1)     | 1.2<br>(1.2 to 1.5)     | 94.2<br>(18.16 to 120.95)    | 1.2<br>(1.2 to 1.8)     | 1.6<br>(3.0 to 0.6)     | 28.9<br>(12.15 to 163.33)  | 0.2<br>(0.1 to 0.1)     | 0.2<br>(0.8 to 1.4)     | 0.2<br>(0.8 to 1.4)         | 0.5<br>(2.78 to 68.04)  | 0.2<br>(0.6 to 0.7)     | 0.2<br>(2.78 to 68.04)    | 0.2<br>(0.6 to 0.7)     | 0.2<br>(0.6 to 0.7)     | 0.2<br>(29.74 to 1.04)     | 0.2<br>(1.2 to 1.5)     | 0.2<br>(1.2 to 1.5)     | 0.2<br>(19.67 to 115.57)    |
| Cellulitis                            | 0.2<br>(0.2 to 0.4)     | 0.7<br>(0.2 to 0.4)     | 204<br>(6.34 to 342.71)      | 0.3<br>(0.4 to 0.8)     | 0.7<br>(0.4 to 0.8)     | 114.7<br>(23.22 to 207.54) | 0.1<br>(0.1 to 0.1)     | 0.1<br>(0.1 to 0.3)     | 19.0<br>(1.35 to 340.08)    | 0.3<br>(0.2 to 0.4)     | 0.5<br>(0.3 to 0.7)     | 88.6<br>(34.35 to 133.47) | 0.2<br>(0.2 to 0.6)     | 0.2<br>(0.2 to 0.6)     | 21.2<br>(7.72 to 379.03)   | 0.3<br>(0.3 to 0.6)     | 0.3<br>(0.4 to 0.7)     | 136.4<br>(1.2431 to 255.85) |
| Pyoderma                              | 0.5<br>(0.1 to 0.1)     | 0.3<br>(0.4 to 0.9)     | 42.2<br>(436.19 to 1,328.89) | 0.6<br>(0.1 to 0.1)     | 0.3<br>(0.4 to 0.8)     | 57.7<br>(266.30 to 875.13) | 0.1<br>(0.0 to <0.05)   | 0.1<br>(0.1 to 0.3)     | 0.1<br>(279.65 to 1,062.93) | 0.4<br>(0.1 to 0.1)     | 0.2<br>(0.3 to 0.6)     | 64<br>(43.82 to 644.32)   | 0.2<br>(0.0 to 0.1)     | 0.2<br>(0.3 to 0.6)     | 60<br>(506.16 to 1,597.04) | 0.2<br>(0.1 to 0.1)     | 0.2<br>(0.5 to 1.0)     | 0.2<br>(346.08 to 1,132.74) |
| Decubitus ulcer                       | 0.5<br>(0.4 to 0.6)     | 0.3<br>(0.2 to 0.4)     | 42.2<br>(57.80 to 16.14)     | 0.6<br>(0.5 to 0.7)     | 0.3<br>(0.5 to 0.7)     | 57.7<br>(57.80 to 16.14)   | 0.1<br>(0.1 to 0.1)     | 0.1<br>(0.1 to 0.1)     | 0.1<br>(51.11 to 23.12)     | 0.4<br>(0.3 to 0.5)     | 0.2<br>(0.1 to 0.3)     | 64<br>(43.82 to 24.14)    | 0.2<br>(0.0 to 0.1)     | 0.2<br>(0.2 to 0.3)     | 60<br>(49.74 to 17.06)     | 0.2<br>(0.2 to 0.5)     | 0.2<br>(0.2 to 0.5)     | 0.2<br>(46.97 to 34.03)     |
| Other skin and subcutaneous diseases  | 0.1<br>(0.1 to 0.1)     | 0.1<br>(0.1 to 0.2)     | 15.4<br>(30.67 to 106.89)    | 0.1<br>(0.1 to 0.2)     | 0.1<br>(0.1 to 0.2)     | 17.9<br>(49.30 to 44.50)   | <0.05<br>(0.0 to <0.05) | <0.05<br>(0.0 to <0.05) | 32.7<br>(28.83 to 132.42)   | 0.1<br>(0.0 to 0.1)     | 0.1<br>(0.0 to 0.1)     | 14.7<br>(51.29 to 50.01)  | 0.1<br>(0.0 to 0.1)     | 0.1<br>(0.0 to 0.1)     | 10.2<br>(46.96 to 115.33)  | 0.1<br>(0.1 to 0.2)     | 0.1<br>(0.1 to 0.2)     | 15.9<br>(49.99 to 58.90)    |
| Sudden infant death syndrome          | 0.1<br>(0.4 to 0.9)     | 0.1<br>(0.1 to 0.4)     | 0.7<br>(83.20 to 23.75)      | 0.1<br>(1.1 to 2.6)     | 0.1<br>(0.4 to 1.2)     | 0.7<br>(83.20 to 23.75)    | 0.1<br>(0.1 to 0.2)     | 0.1<br>(0.1 to 0.2)     | 0.1<br>(83.20 to 23.75)     | 0.1<br>(1.2 to 3.0)     | 0.1<br>(0.4 to 1.3)     | 0.1<br>(83.20 to 23.75)   | 0.1<br>(0.1 to 0.2)     | 0.1<br>(0.1 to 0.2)     | 0.1<br>(83.20 to 23.75)    | 0.1<br>(0.7 to 2.4)     | 0.1<br>(0.3 to 1.2)     | 0.1<br>(48.28 to 10.63)     |
| Injuries                              | 17.7<br>(17.7 to 18.7)  | 15.6<br>(13.7 to 16.8)  | 342<br>(21,380 to 2,17)      | 30.2<br>(21,76 to 32.8) | 30.2<br>(18.7 to 21.9)  | 342<br>(39,900 to 1,22)    | 10.7<br>(10.2 to 11.4)  | 10.7<br>(7.9 to 9.9)    | 34.4<br>(25.83 to 30.3)     | 14.2<br>(49.9 to 45.8)  | 14.2<br>(24.7 to 30.3)  | 34.4<br>(42.50 to 30.10)  | 14.2<br>(5.3 to 4.4)    | 14.2<br>(3.1 to 4.1)    | 34.4<br>(20,440 to 1,98)   | 17.7<br>(17.4 to 18.1)  | 15.6<br>(11.4 to 14.9)  | 15.6<br>(39,950 to 10.33)   |
| Transport injuries                    | 4.7<br>(4.4 to 4.9)     | 2.6<br>(2.3 to 2.8)     | 46.0<br>(49.67 to 41.97)     | 9.3<br>(8.9 to 9.7)     | 4.3<br>(3.9 to 4.6)     | 54.2<br>(57.43 to 50.71)   | 3.5<br>(4.4 to 3.6)     | 1.9<br>(1.7 to 2.0)     | 14.4<br>(51.00 to 41.47)    | 14.2<br>(34.0 to 14.9)  | 14.2<br>(6.0 to 7.2)    | 54.2<br>(58.58 to 50.46)  | 14.2<br>(1.0 to 1.4)    | 14.2<br>(0.6 to 0.9)    | 46.0<br>(50.79 to 33.89)   | 3.5<br>(3.5 to 4.0)     | 2.6<br>(1.7 to 2.6)     | 4.7<br>(47.83 to 46.23)     |
| Road injuries                         | 4.8<br>(4.3 to 4.8)     | 2.8<br>(2.2 to 2.7)     | 46.0<br>(85.4 to 42.59)      | 9.3<br>(8.5 to 9.4)     | 4.3<br>(4.2 to 4.8)     | 54.2<br>(58.12 to 51.47)   | 3.5<br>(3.2 to 3.5)     | 1.9<br>(1.6 to 1.8)     | 14.4<br>(51.93 to 42.78)    | 14.2<br>(13.4 to 14.4)  | 14.2<br>(7.6 to 6.8)    | 54.2<br>(59.11 to 51.19)  | 14.2<br>(1.0 to 1.4)    | 14.2<br>(0.5 to 0.9)    | 46.0<br>(44.8 to 4.8)      | 3.5<br>(3.4 to 4.8)     | 2.6<br>(1.6 to 2.5)     | 4.7<br>(58.40 to 50.60)     |
| Pedestrian road injuries              | 1.4<br>(1.2 to 1.3)     | 0.7<br>(0.6 to 0.9)     | 49.3<br>(55.52 to 30.08)     | 2.5<br>(1.9 to 1.6)     | 1.0<br>(0.8 to 1.0)     | 60<br>(64.23 to 52.91)     | 0.9<br>(0.8 to 0.7)     | 0.9<br>(0.8 to 0.7)     | 47.4<br>(55.12 to 37.39)    | 7.7<br>(10.4 to 5.1)    | 7.7<br>(1.7 to 2.3)     | 47.4<br>(45.40 to 52.12)  | 0.5<br>(0.3 to 0.6)     | 0.5<br>(0.2 to 0.3)     | 49.5<br>(58.89 to 17.68)   | 1.5<br>(1.0 to 1.9)     | 0.8<br>(0.4 to 0.8)     | 1.4<br>(46.96 to 52.68)     |
| Cyclist road injuries                 | 0.3<br>(0.2 to 0.3)     | 0.1<br>(0.1 to 0.2)     | 58.6<br>(58.39 to 39.57)     | 0.6<br>(0.4 to 0.7)     | 0.2<br>(0.2 to 0.3)     | 58.6<br>(66.20 to 51.96)   | 0.2<br>(0.1 to 0.3)     | 0.1<br>(0.1 to 0.1)     | 0.2<br>(65.04 to 35.94)     | 0.6<br>(0.6 to 1.2)     | 0.4<br>(0.2 to 0.5)     | 58.6<br>(49.16 to 58.88)  | 0.1<br>(0.0 to 0.1)     | 0.1<br>(0.0 to 0.05)    | 60.5<br>(58.89 to 42.5)    | 0.2<br>(0.2 to 0.3)     | 0.1<br>(0.1 to 0.1)     | 0.1<br>(48.93 to 41.90)     |
| Motorcyclist road injuries            | 0.1<br>(0.1 to 0.4)     | 0.2<br>(0.2 to 0.5)     | 60.9<br>(60.89 to 43.34)     | 0.1<br>(1.1 to 2.1)     | 0.1<br>(0.5 to 0.9)     | 60.9<br>(64.18 to 48.08)   | 0.1<br>(0.5 to 0.3)     | 0.1<br>(0.2 to 0.4)     | 0.1<br>(61.39 to 41.95)     | 0.1<br>(2.0 to 3.8)     | 0.1<br>(0.9 to 1.7)     | 60.9<br>(64.43 to 46.64)  | 0.1<br>(0.0 to 0.1)     | 0.1<br>(0.0 to 0.05)    | 60.9<br>(44.13 to 46.38)   | 0.1<br>(0.1 to 0.4)     | 0.1<br>(0.2 to 0.2)     | 0.1<br>(48.93 to 41.90)     |
| Motor vehicle road injuries           | 2.5<br>(2.2 to 2.5)     | 1.2<br>(1.0 to 1.3)     | 42.9<br>(48.50 to 36.44)     | 4.3<br>(4.8 to 4.2)     | 2.1<br>(2.7 to 2.4)     | 59.9<br>(64.50 to 46.12)   | 1.5<br>(1.7 to 1.6)     | 1.5<br>(1.6 to 1.8)     | 4.5<br>(51.23 to 54.78)     | 6.4<br>(2.4 to 6.7)     | 3.0<br>(4.2 to 5.5)     | 51.9<br>(57.58 to 44.74)  | 0.6<br>(0.2 to 0.5)     | 0.6<br>(0.2 to 0.5)     | 38.7<br>(47.16 to 29.29)   | 2.2<br>(1.7 to 8.0)     | 1.2<br>(0.5 to 1.4)     | 48.3<br>(54.70 to 41.01)    |
| Other road injuries                   | <0.05<br>(0.0 to <0.05) | <0.05<br>(0.0 to <0.05) | 53.3<br>(55.46 to 38.65)     | 0.1<br>(0.0 to 0.1)     | <0.05<br>(0.0 to <0.05) | 62.1<br>(70.46 to 38.05)   | <0.05<br>(0.0 to <0.05) | <0.05<br>(0.0 to <0.05) | 67.5<br>(78.07 to 36.07)    | 0.1<br>(0.0 to 0.1)     | 0.1<br>(0.0 to 0.05)    | 53.3<br>(81.87 to 51.15)  | <0.05<br>(0.0 to <0.05) | <0.05<br>(0.0 to <0.05) | 53.3<br>(67.61 to 50.02)   | <0.05<br>(0.0 to <0.05) | <0.05<br>(0.0 to <0.05) | <0.05<br>(48.93 to 16.10)   |
| Other transport injuries              | 0.1<br>(0.1 to 0.2)     | 0.1<br>(0.1 to 0.2)     | 35.3<br>(35.13 to 10.95)     | 0.1<br>(0.2 to 0.4)     | <0.05<br>(0.2 to 0.2)   | 35.3<br>(44.37 to 21.74)   | 0.1<br>(0.1 to 0.1)     | 0.1<br>(0.1 to 0.1)     | 35.3<br>(38.65 to 7.75)     | 0.1<br>(0.2 to 0.6)     | 0.1<br>(0.2 to 0.4)     | 35.3<br>(47.75 to 21.74)  | 0.1<br>(0.0 to 0.05)    | 0.1<br>(0.0 to 0.05)    | 35.3<br>(35.41 to 0.67)    | 0.1<br>(0.1 to 0.2)     | 0.1<br>(0.1 to 0.1)     | 0.1<br>(44.48 to 15.24)     |
| Unintentional injuries                | 6.8<br>(6.1 to 6.8)     | 9.2<br>(7.8 to 10.1)    | 35.7<br>(35.74 to 12.39)     | 10.5<br>(9.3 to 10.9)   | 10<br>(11.3 to 10.3)    | 48<br>(47.87 to 53.13)     | 11.4<br>(12.1 to 10.7)  | 4.2<br>(3.9 to 4.7)     | 12.5<br>(13.8 to 15.12)     | 11.4<br>(11.6 to 14.4)  | 11.4<br>(9.1 to 12.7)   | 35.7<br>(39.04 to 25.5)   | 9.2<br>(7.8 to 9.7)     | 9.2<br>(7.8 to 9.7)     | 35.7<br>(44.14 to 23.36)   | 6.8<br>(7.5 to 10.4)    | 9.2<br>(6.6 to 7.7)     | 9.2<br>(22.71 to 18.39)     |
| Falls                                 | 3.5<br>(3.2 to 4.9)     | 0.7<br>(4.3 to 7.0)     | 75.5<br>(80.7 to 113.55)     | 4.9<br>(4.4 to 6.7)     | 6.0<br>(6.3 to 6.0)     | 23.3<br>(22.99 to 50.94)   | 2.6<br>(1.2 to 1.8)     | 2.6<br>(1.7 to 3.0)     | 2.6<br>(13.30 to 139.90)    | 2.6<br>(8.9 to 7.2)     | 2.6<br>(4.3 to 7.5)     | 75.5<br>(48.20 to 51.10)  | 2.6<br>(1.9 to 3.3)     | 2.6<br>(2.3 to 4.2)     | 75.5<br>(67.48 to 105.37)  | 3.5<br>(3.6 to 6.4)     | 0.7<br>(3.2 to 0.7)     | 3.5<br>(22.80 to 37.72)     |
| Drowning                              | 0.1<br>(0.1 to 0.4)     | 0.2<br>(0.2 to 0.3)     | 34.1<br>(44.25 to 11.39)     | 0.7<br>(0.6 to 0.8)     | 0.4<br>(0.3 to 0.5)     | 48.0<br>(53.05 to 31.36)   | 0.4<br>(0.2 to 0.3)     | 0.2<br>(0.1 to 0.2)     | 48.0<br>(45.50 to 4.01)     | 0.4<br>(0.8 to 1.3)     | 0.4<br>(0.5 to 0.8)     | 34.1<br>(53.58 to 29.20)  | 0.1<br>(0.1 to 0.1)     | 0.1<br>(0.1 to 0.1)     | 34.1<br>(48.68 to 17.87)   | 0.1<br>(0.3 to 0.4)     | 0.1<br>(0.1 to 0.2)     | 0.1<br>(47.77 to 34.63)     |
| Fire, heat, and hot substances        | 0.6<br>(0.3 to 0.7)     | 0.4<br>(0.3 to 0.5)     | 39.8<br>(50.19 to 6.76)      | 1.1<br>(0.8 to 1.2)     | 0.3<br>(0.4 to 0.7)     | 53.8<br>(61.82 to 24.33)   | 0.2<br>(0.2 to 0.4)     | 0.2<br>(0.2 to 0.4)     | 39.8<br>(49.91 to 12.59)    | 0.2<br>(0.9 to 1.5)     | 0.2<br>(0.5 to 0.9)     | 39.8<br>(42.72 to 18.51)  | 0.2<br>(0.2 to 0.4)     | 0.2<br>(0.1 to 0.2)     | 39.8<br>(52.62 to 8.01)    | 0.2<br>(0.7 to 1.0)     | 0.2<br>(0.2 to 0.4)     | 0.2<br>(42.16 to 29.24)     |
| Poisonings                            | 0.4<br>(0.3 to 0.5)     | 0.2<br>(0.5 to 0.9)     | 59.3<br>(71.69 to 8.45)      | 0.8<br>(0.2 to 0.5)     | 0.1<br>(0.7 to 2.7)     | 66.8<br>(76.74 to 27.43)   | 0.1<br>(0.1 to 0.2)     | 0.1<br>(0.1 to 0.2)     | 66.8<br>(77.26 to 11.07)    | 0.1<br>(0.6 to 1.3)     | 0.1<br>(0.2 to 0.7)     | 59.3<br>(80.86 to 28.35)  | 0.1<br>(0.1 to 0.1)     | 0.1<br>(0.1 to 0.2)     | 59.3<br>(63.30 to 7.73)    | 0.1<br>(0.2 to 0.4)     | 0.1<br>(0.2 to 0.6)     |                             |

| Cause                                                                     | Both sexes combined             |                                 |                           |                                     |                              |                           |                              |                                 |                              |                                     |                                   |                               | Males                           |                               |                           |                                     |                                 |                           |                     |      |          |                                     |          |  | Females |  |  |  |  |  |  |  |  |  |  |  |
|---------------------------------------------------------------------------|---------------------------------|---------------------------------|---------------------------|-------------------------------------|------------------------------|---------------------------|------------------------------|---------------------------------|------------------------------|-------------------------------------|-----------------------------------|-------------------------------|---------------------------------|-------------------------------|---------------------------|-------------------------------------|---------------------------------|---------------------------|---------------------|------|----------|-------------------------------------|----------|--|---------|--|--|--|--|--|--|--|--|--|--|--|
|                                                                           | YLLs (in thousands)             |                                 |                           | Age-standardized rate (per 100,000) |                              |                           | YLLs (in thousands)          |                                 |                              | Age-standardized rate (per 100,000) |                                   |                               | YLLs (in thousands)             |                               |                           | Age-standardized rate (per 100,000) |                                 |                           | YLLs (in thousands) |      |          | Age-standardized rate (per 100,000) |          |  |         |  |  |  |  |  |  |  |  |  |  |  |
|                                                                           | 1990                            | 2013                            | % change                  | 1990                                | % change                     | 1990                      | % change                     | 1990                            | % change                     | 1990                                | % change                          | 1990                          | % change                        | 1990                          | % change                  | 1990                                | % change                        | 1990                      | % change            | 1990 | % change | 1990                                | % change |  |         |  |  |  |  |  |  |  |  |  |  |  |
| <b>All causes</b>                                                         | 8,945.5<br>(8,905.2 to 8,985.8) | 6,645.6<br>(6,274.6 to 6,812.2) | -26.8<br>(-29.1 to -25.2) | 474.73<br>(1,334.3 to 1,553.9)      | -6.876<br>(-6.876 to -6.876) | 41.1<br>(43.6 to 38.3)    | -5.039<br>(-5.039 to -5.039) | 3,699.9<br>(3,412.1 to 3,813.2) | -2.261<br>(-2.261 to -2.261) | 38,800<br>(38,254 to 39,025.1)      | 10,427.2<br>(9,854.4 to 10,616.9) | 44.8<br>(47.8 to 41.8)        | 3,925.6<br>(3,892.9 to 3,957.2) | 2,957<br>(2,780.1 to 3,120.4) | 25.2<br>(29.3 to 21.0)    | 11,357.6<br>(11,274.1 to 11,499.1)  | 7,082.6<br>(6,605.9 to 7,525.0) | 37.6<br>(-41.2 to 33.4)   |                     |      |          |                                     |          |  |         |  |  |  |  |  |  |  |  |  |  |  |
| <b>Communicable, maternal, neonatal, and nutritional diseases</b>         | 655.7<br>(65.3 to 782)          | 501.7<br>(458 to 551.5)         | -23.2<br>(-26.4)          | 1,398.8<br>(1,334.3 to 1,553.9)     | -16.7<br>(-16.7 to -16.7)    | 41.6<br>(43.6 to 39.1)    | -34.8<br>(-34.8 to -34.8)    | 3,380<br>(3,030 to 3,730)       | -27.5<br>(-27.5 to -27.5)    | 16,113<br>(15,250 to 17,860)        | 907.3<br>(802.1 to 1,023.6)       | 1,611.3<br>(1,520.5 to 1,860) | 386.0<br>(386.0 to 386.0)       | 248.7<br>(220.9 to 287)       | 48.5<br>(34.9 to 62.1)    | 1,207.1<br>(1,184.1 to 1,358.9)     | 725.4<br>(635 to 826.3)         | -25.9<br>(-25.9 to -25.9) |                     |      |          |                                     |          |  |         |  |  |  |  |  |  |  |  |  |  |  |
| <b>HIV/AIDS and tuberculosis</b>                                          | 26.1<br>(23.9 to 28.2)          | 12.2<br>(12.6 to 18.7)          | -53.3<br>(-54.1 to -49.3) | 40.4<br>(44.7 to 55.8)              | -42.4<br>(-42.4 to -42.4)    | 40.4<br>(44.7 to 55.8)    | -42.4<br>(-42.4 to -42.4)    | 15.1<br>(19.8 to 29.4)          | -57.2<br>(-57.2 to -57.2)    | 12.1<br>(17.2 to 24.1)              | 12.1<br>(17.2 to 24.1)            | 12.1<br>(17.2 to 24.1)        | 12.1<br>(17.2 to 24.1)          | 12.1<br>(17.2 to 24.1)        | 12.1<br>(17.2 to 24.1)    | 12.1<br>(17.2 to 24.1)              | 12.1<br>(17.2 to 24.1)          | 12.1<br>(17.2 to 24.1)    |                     |      |          |                                     |          |  |         |  |  |  |  |  |  |  |  |  |  |  |
| <b>Tuberculosis</b>                                                       | 11.6<br>(11.6 to 11.6)          | 6.5<br>(6.5 to 6.5)             | -44.8<br>(-44.8 to -44.8) | 15.1<br>(15.1 to 15.1)              | -15.1<br>(-15.1 to -15.1)    | 15.1<br>(15.1 to 15.1)    | -15.1<br>(-15.1 to -15.1)    | 15.1<br>(15.1 to 15.1)          | -15.1<br>(-15.1 to -15.1)    | 15.1<br>(15.1 to 15.1)              | 15.1<br>(15.1 to 15.1)            | 15.1<br>(15.1 to 15.1)        | 15.1<br>(15.1 to 15.1)          | 15.1<br>(15.1 to 15.1)        | 15.1<br>(15.1 to 15.1)    | 15.1<br>(15.1 to 15.1)              | 15.1<br>(15.1 to 15.1)          | 15.1<br>(15.1 to 15.1)    |                     |      |          |                                     |          |  |         |  |  |  |  |  |  |  |  |  |  |  |
| <b>HIV/AIDS</b>                                                           | 11.9<br>(11.9 to 11.9)          | 5.7<br>(5.7 to 5.7)             | -52.1<br>(-52.1 to -52.1) | 25.6<br>(25.6 to 25.6)              | -15.5<br>(-15.5 to -15.5)    | 15.5<br>(15.5 to 15.5)    | -15.5<br>(-15.5 to -15.5)    | 15.5<br>(15.5 to 15.5)          | -15.5<br>(-15.5 to -15.5)    | 15.5<br>(15.5 to 15.5)              | 15.5<br>(15.5 to 15.5)            | 15.5<br>(15.5 to 15.5)        | 15.5<br>(15.5 to 15.5)          | 15.5<br>(15.5 to 15.5)        | 15.5<br>(15.5 to 15.5)    | 15.5<br>(15.5 to 15.5)              | 15.5<br>(15.5 to 15.5)          | 15.5<br>(15.5 to 15.5)    |                     |      |          |                                     |          |  |         |  |  |  |  |  |  |  |  |  |  |  |
| <b>HIV/AIDS resulting in mycobacterial infection</b>                      | 0.9<br>(0.9 to 0.9)             | 0.5<br>(0.5 to 0.5)             | -44.4<br>(-44.4 to -44.4) | 1.8<br>(1.8 to 1.8)                 | -1.8<br>(-1.8 to -1.8)       | 1.8<br>(1.8 to 1.8)       | -1.8<br>(-1.8 to -1.8)       | 1.8<br>(1.8 to 1.8)             | -1.8<br>(-1.8 to -1.8)       | 1.8<br>(1.8 to 1.8)                 | 1.8<br>(1.8 to 1.8)               | 1.8<br>(1.8 to 1.8)           | 1.8<br>(1.8 to 1.8)             | 1.8<br>(1.8 to 1.8)           | 1.8<br>(1.8 to 1.8)       | 1.8<br>(1.8 to 1.8)                 | 1.8<br>(1.8 to 1.8)             | 1.8<br>(1.8 to 1.8)       |                     |      |          |                                     |          |  |         |  |  |  |  |  |  |  |  |  |  |  |
| <b>HIV/AIDS resulting in other diseases</b>                               | 15.2<br>(15.2 to 15.2)          | 5.2<br>(5.2 to 5.2)             | -65.8<br>(-65.8 to -65.8) | 23.8<br>(23.8 to 23.8)              | -13.7<br>(-13.7 to -13.7)    | 13.7<br>(13.7 to 13.7)    | -13.7<br>(-13.7 to -13.7)    | 13.7<br>(13.7 to 13.7)          | -13.7<br>(-13.7 to -13.7)    | 13.7<br>(13.7 to 13.7)              | 13.7<br>(13.7 to 13.7)            | 13.7<br>(13.7 to 13.7)        | 13.7<br>(13.7 to 13.7)          | 13.7<br>(13.7 to 13.7)        | 13.7<br>(13.7 to 13.7)    | 13.7<br>(13.7 to 13.7)              | 13.7<br>(13.7 to 13.7)          | 13.7<br>(13.7 to 13.7)    |                     |      |          |                                     |          |  |         |  |  |  |  |  |  |  |  |  |  |  |
| <b>Diarrhoea, lower respiratory, and other common infectious diseases</b> | 404.0<br>(381.1 to 428.9)       | 342.0<br>(311.1 to 393.2)       | -15.1<br>(-16.3 to -13.9) | 648.7<br>(612.2 to 685.2)           | -36.0<br>(-36.0 to -36.0)    | 18.2<br>(17.7 to 18.7)    | -18.0<br>(-18.0 to -18.0)    | 160.0<br>(142.3 to 182.5)       | -30.7<br>(-30.7 to -30.7)    | 754<br>(699.4 to 798.5)             | 455.1<br>(402.2 to 505.8)         | 39.3<br>(39.3 to 39.3)        | 216.7<br>(202.9 to 231.7)       | 180.0<br>(158.3 to 197.3)     | 46.8<br>(42.8 to 50.8)    | 56.9<br>(53.2 to 60.3)              | 374.4<br>(332 to 396.8)         | -33.7<br>(-33.7 to -33.7) |                     |      |          |                                     |          |  |         |  |  |  |  |  |  |  |  |  |  |  |
| <b>Diarrhoeal diseases</b>                                                | 4.8<br>(4.3 to 5.2)             | 2.9<br>(2.9 to 2.9)             | -39.6<br>(-39.6 to -39.6) | 28.5<br>(25.5 to 32.0)              | -28.5<br>(-28.5 to -28.5)    | 28.5<br>(25.5 to 32.0)    | -28.5<br>(-28.5 to -28.5)    | 28.5<br>(25.5 to 32.0)          | -28.5<br>(-28.5 to -28.5)    | 28.5<br>(25.5 to 32.0)              | 28.5<br>(25.5 to 32.0)            | 28.5<br>(25.5 to 32.0)        | 28.5<br>(25.5 to 32.0)          | 28.5<br>(25.5 to 32.0)        | 28.5<br>(25.5 to 32.0)    | 28.5<br>(25.5 to 32.0)              | 28.5<br>(25.5 to 32.0)          | 28.5<br>(25.5 to 32.0)    |                     |      |          |                                     |          |  |         |  |  |  |  |  |  |  |  |  |  |  |
| <b>Intestinal infectious diseases</b>                                     | 3.3<br>(3.3 to 3.3)             | 3.6<br>(3.6 to 3.6)             | 9.1<br>(9.1 to 9.1)       | 8.2<br>(8.2 to 8.2)                 | -1.0<br>(-1.0 to -1.0)       | 21.0<br>(21.0 to 21.0)    | -1.0<br>(-1.0 to -1.0)       | 21.0<br>(21.0 to 21.0)          | -1.0<br>(-1.0 to -1.0)       | 21.0<br>(21.0 to 21.0)              | 21.0<br>(21.0 to 21.0)            | 21.0<br>(21.0 to 21.0)        | 21.0<br>(21.0 to 21.0)          | 21.0<br>(21.0 to 21.0)        | 21.0<br>(21.0 to 21.0)    | 21.0<br>(21.0 to 21.0)              | 21.0<br>(21.0 to 21.0)          | 21.0<br>(21.0 to 21.0)    |                     |      |          |                                     |          |  |         |  |  |  |  |  |  |  |  |  |  |  |
| <b>Typhoid fever</b>                                                      | 0.4<br>(0.4 to 0.4)             | 0.7<br>(0.7 to 0.7)             | 75.0<br>(75.0 to 75.0)    | 1.8<br>(1.8 to 1.8)                 | -1.8<br>(-1.8 to -1.8)       | 1.8<br>(1.8 to 1.8)       | -1.8<br>(-1.8 to -1.8)       | 1.8<br>(1.8 to 1.8)             | -1.8<br>(-1.8 to -1.8)       | 1.8<br>(1.8 to 1.8)                 | 1.8<br>(1.8 to 1.8)               | 1.8<br>(1.8 to 1.8)           | 1.8<br>(1.8 to 1.8)             | 1.8<br>(1.8 to 1.8)           | 1.8<br>(1.8 to 1.8)       | 1.8<br>(1.8 to 1.8)                 | 1.8<br>(1.8 to 1.8)             | 1.8<br>(1.8 to 1.8)       |                     |      |          |                                     |          |  |         |  |  |  |  |  |  |  |  |  |  |  |
| <b>Paratyphoid fever</b>                                                  | 0.0<br>(0.0 to 0.0)             | 0.0<br>(0.0 to 0.0)             | -                         | 0.0<br>(0.0 to 0.0)                 | -                            | 0.0<br>(0.0 to 0.0)       | -                            | 0.0<br>(0.0 to 0.0)             | -                            | 0.0<br>(0.0 to 0.0)                 | 0.0<br>(0.0 to 0.0)               | 0.0<br>(0.0 to 0.0)           | 0.0<br>(0.0 to 0.0)             | 0.0<br>(0.0 to 0.0)           | 0.0<br>(0.0 to 0.0)       | 0.0<br>(0.0 to 0.0)                 | 0.0<br>(0.0 to 0.0)             | 0.0<br>(0.0 to 0.0)       |                     |      |          |                                     |          |  |         |  |  |  |  |  |  |  |  |  |  |  |
| <b>Other intestinal infectious diseases</b>                               | 0.5<br>(0.5 to 0.5)             | 0.2<br>(0.2 to 0.2)             | -60.0<br>(-60.0 to -60.0) | 1.1<br>(1.1 to 1.1)                 | -1.1<br>(-1.1 to -1.1)       | 1.1<br>(1.1 to 1.1)       | -1.1<br>(-1.1 to -1.1)       | 1.1<br>(1.1 to 1.1)             | -1.1<br>(-1.1 to -1.1)       | 1.1<br>(1.1 to 1.1)                 | 1.1<br>(1.1 to 1.1)               | 1.1<br>(1.1 to 1.1)           | 1.1<br>(1.1 to 1.1)             | 1.1<br>(1.1 to 1.1)           | 1.1<br>(1.1 to 1.1)       | 1.1<br>(1.1 to 1.1)                 | 1.1<br>(1.1 to 1.1)             | 1.1<br>(1.1 to 1.1)       |                     |      |          |                                     |          |  |         |  |  |  |  |  |  |  |  |  |  |  |
| <b>Lower respiratory infections</b>                                       | 144.4<br>(144.4 to 144.4)       | 102.7<br>(102.7 to 102.7)       | -29.5<br>(-29.5 to -29.5) | 359.2<br>(312.9 to 386.9)           | -35.3<br>(-35.3 to -35.3)    | 147.1<br>(124.5 to 161.2) | -35.3<br>(-35.3 to -35.3)    | 147.1<br>(124.5 to 161.2)       | -35.3<br>(-35.3 to -35.3)    | 147.1<br>(124.5 to 161.2)           | 147.1<br>(124.5 to 161.2)         | 147.1<br>(124.5 to 161.2)     | 147.1<br>(124.5 to 161.2)       | 147.1<br>(124.5 to 161.2)     | 147.1<br>(124.5 to 161.2) | 147.1<br>(124.5 to 161.2)           | 147.1<br>(124.5 to 161.2)       | 147.1<br>(124.5 to 161.2) |                     |      |          |                                     |          |  |         |  |  |  |  |  |  |  |  |  |  |  |
| <b>Upper respiratory infections</b>                                       | 0.3<br>(0.3 to 0.3)             | 0.3<br>(0.3 to 0.3)             | 0.0<br>(0.0 to 0.0)       | 0.4<br>(0.4 to 0.4)                 | -0.4<br>(-0.4 to -0.4)       | 0.4<br>(0.4 to 0.4)       | -0.4<br>(-0.4 to -0.4)       | 0.4<br>(0.4 to 0.4)             | -0.4<br>(-0.4 to -0.4)       | 0.4<br>(0.4 to 0.4)                 | 0.4<br>(0.4 to 0.4)               | 0.4<br>(0.4 to 0.4)           | 0.4<br>(0.4 to 0.4)             | 0.4<br>(0.4 to 0.4)           | 0.4<br>(0.4 to 0.4)       | 0.4<br>(0.4 to 0.4)                 | 0.4<br>(0.4 to 0.4)             | 0.4<br>(0.4 to 0.4)       |                     |      |          |                                     |          |  |         |  |  |  |  |  |  |  |  |  |  |  |
| <b>Otitis media</b>                                                       | 1.3<br>(1.2 to 1.5)             | 0.5<br>(0.4 to 0.5)             | -61.5<br>(-61.5 to -61.5) | 3.1<br>(2.8 to 3.6)                 | -2.8<br>(-2.8 to -2.8)       | 71.1<br>(74.8 to 59.1)    | -2.8<br>(-2.8 to -2.8)       | 71.1<br>(74.8 to 59.1)          | -2.8<br>(-2.8 to -2.8)       | 71.1<br>(74.8 to 59.1)              | 71.1<br>(74.8 to 59.1)            | 71.1<br>(74.8 to 59.1)        | 71.1<br>(74.8 to 59.1)          | 71.1<br>(74.8 to 59.1)        | 71.1<br>(74.8 to 59.1)    | 71.1<br>(74.8 to 59.1)              | 71.1<br>(74.8 to 59.1)          | 71.1<br>(74.8 to 59.1)    |                     |      |          |                                     |          |  |         |  |  |  |  |  |  |  |  |  |  |  |
| <b>Meningitis</b>                                                         | 22.1<br>(19.5 to 25.7)          | 12.1<br>(8.4 to 11.7)           | -45.3<br>(-45.3 to -45.3) | 50.2<br>(46.6 to 53.8)              | -38.1<br>(-38.1 to -38.1)    | 156.6<br>(146.7 to 156.6) | -38.1<br>(-38.1 to -38.1)    | 156.6<br>(146.7 to 156.6)       | -38.1<br>(-38.1 to -38.1)    | 156.6<br>(146.7 to 156.6)           | 156.6<br>(146.7 to 156.6)         | 156.6<br>(146.7 to 156.6)     | 156.6<br>(146.7 to 156.6)       | 156.6<br>(146.7 to 156.6)     | 156.6<br>(146.7 to 156.6) | 156.6<br>(146.7 to 156.6)           | 156.6<br>(146.7 to 156.6)       | 156.6<br>(146.7 to 156.6) |                     |      |          |                                     |          |  |         |  |  |  |  |  |  |  |  |  |  |  |
| <b>Pneumococcal meningitis</b>                                            | 3.3<br>(2.9 to 3.7)             | 1.5<br>(1.2 to 1.8)             | -54.5<br>(-54.5 to -54.5) | 7.7<br>(6.8 to 8.6)                 | -3.1<br>(-3.1 to -3.1)       | 59.7<br>(56.6 to 62.8)    | -3.1<br>(-3.1 to -3.1)       | 59.7<br>(56.6 to 62.8)          | -3.1<br>(-3.1 to -3.1)       | 59.7<br>(56.6 to 62.8)              | 59.7<br>(56.6 to 62.8)            | 59.7<br>(56.6 to 62.8)        | 59.7<br>(56.6 to 62.8)          | 59.7<br>(56.6 to 62.8)        | 59.7<br>(56.6 to 62.8)    | 59.7<br>(56.6 to 62.8)              | 59.7<br>(56.6 to 62.8)          | 59.7<br>(56.6 to 62.8)    |                     |      |          |                                     |          |  |         |  |  |  |  |  |  |  |  |  |  |  |
| <b>H influenzae type 2 meningitis</b>                                     | 4.4<br>(3.7 to 5.7)             | 1.1<br>(1.2 to 2.4)             | -74.8<br>(-74.8 to -74.8) | 11.7<br>(9.8 to 13.3)               | -10.6<br>(-10.6 to -10.6)    | 58.6<br>(56.2 to 61.0)    | -10.6<br>(-10.6 to -10.6)    | 58.6<br>(56.2 to 61.0)          | -10.6<br>(-10.6 to -10.6)    | 58.6<br>(56.2 to 61.0)              | 58.6<br>(56.2 to 61.0)            | 58.6<br>(56.2 to 61.0)        | 58.6<br>(56.2 to 61.0)          | 58.6<br>(56.2 to 61.0)        | 58.6<br>(56.2 to 61.0)    | 58.6<br>(56.2 to 61.0)              | 58.6<br>(56.2 to 61.0)          | 58.6<br>(56.2 to 61.0)    |                     |      |          |                                     |          |  |         |  |  |  |  |  |  |  |  |  |  |  |
| <b>Meningococcal meningitis</b>                                           | 6.1<br>(6.1 to 6.1)             | 0.8<br>(0.8 to 0.8)             | -87.0<br>(-87.0 to -87.0) | 14.4<br>(14.4 to 14.4)              | -13.8<br>(-13.8 to -13.8)    | 89.0<br>(89.0 to 89.0)    | -13.8<br>(-13.8 to -13.8)    | 89.0<br>(89.0 to 89.0)          | -13.8<br>(-13.8 to -13.8)    | 89.0<br>(89.0 to 89.0)              | 89.0<br>(89.0 to 89.0)            | 89.0<br>(89.0 to 89.0)        | 89.0<br>(89.0 to 89.0)          | 89.0<br>(89.0 to 89.0)        | 89.0<br>(89.0 to 89.0)    | 89.0<br>(89.0 to 89.0)              | 89.0<br>(89.0 to 89.0)          | 89.0<br>(89.0 to 89.0)    |                     |      |          |                                     |          |  |         |  |  |  |  |  |  |  |  |  |  |  |
| <b>Other meningitis</b>                                                   | 7.5<br>(6.8 to 8.5)             | 3.3<br>(2.4 to 4.6)             | -55.7<br>(-55.7 to -55.7) | 17.8<br>(15.4 to 20.2)              | -7.0<br>(-7.0 to -7.0)       | 46.7<br>(46.7 to 46.7)    | -7.0<br>(-7.0 to -7.0)       | 46.7<br>(46.7 to 46.7)          | -7.0<br>(-7.0 to -7.0)       | 46.7<br>(46.7 to 46.7)              | 46.7<br>(46.7 to 46.7)            | 46.7<br>(46.7 to 46.7)        | 46.7<br>(46.7 to 46.7)          | 46.7<br>(46.7 to 46.7)        | 46.7<br>(46.7 to 46.7)    | 46.7<br>(46.7 to 46.7)              | 46.7<br>(46.7 to 46.7)          | 46.7<br>(46.7 to 46.7)    |                     |      |          |                                     |          |  |         |  |  |  |  |  |  |  |  |  |  |  |
| <b>Encephalitis</b>                                                       | 3.4<br>(2.9 to 4.6)             | 3.8<br>(2.4 to 4.7)             | 11.8<br>(11.8 to 11.8)    | 15.3<br>(14.8 to 15.8)              | -0.5<br>(-0.5 to -0.5)       | 7.6<br>(7.6 to 7.6)       | -0.5<br>(-0.5 to -0.5)       | 7.6<br>(7.6 to 7.6)             | -0.5<br>(-0.5 to -0.5)       | 7.6<br>(7.6 to 7.6)                 | 7.6<br>(7.6 to 7.6)               | 7.6<br>(7.6 to 7.6)           | 7.6<br>(7.6 to 7.6)             | 7.6<br>(7.6 to 7.6)           | 7.6<br>(7.6 to 7.6)       | 7.6<br>(7.6 to 7.6)                 | 7.6<br>(7.6 to 7.6)             | 7.6<br>(7.6 to 7.6)       |                     |      |          |                                     |          |  |         |  |  |  |  |  |  |  |  |  |  |  |
| <b>Diphtheria</b>                                                         | 0.1<br>(0.1 to 0.2)             | 0.1<br>(0.1 to 0.1)             | 0.0<br>(0.0 to 0.0)       | 0.1<br>(0.1 to 0.1)                 | -0.1<br>(-0.1 to -0.1)       | 0.1<br>(0.1 to 0.1)       | -0.1<br>(-0.1 to -0.1)       | 0.1<br>(0.1 to 0.1)             | -0.1<br>(-0.1 to -0.1)       | 0.1<br>(0.1 to 0.1)                 | 0.1<br>(0.1 to 0.1)               | 0.1<br>(0.1 to 0.1)           | 0.1<br>(0.1 to 0.1)             | 0.1<br>(0.1 to 0.1)           | 0.1<br>(0.1 to 0.1)       | 0.1<br>(0.1 to 0.1)                 | 0.1<br>(0.1 to 0.1)             | 0.1<br>(0.1 to 0.1)       |                     |      |          |                                     |          |  |         |  |  |  |  |  |  |  |  |  |  |  |
| <b>Whooping cough</b>                                                     | 0.3<br>(0.3 to 0.6)             | 0.5<br>(0.2 to 0.9)             | 66.7<br>(66.7 to 66.7)    | 48.4<br>(48.4 to 48.4)              | -0.9<br>(-0.9 to -0.9)       | 21.3<br>(21.3 to 21.3)    | -0.9<br>(-0.9 to -0.9)       | 21.3<br>(21.3 to 21.3)          | -0.9<br>(-0.9 to -0.9)       | 21.3<br>(21.3 to 21.3)              | 21.3<br>(21.3 to 21.3)            | 21.3<br>(21.3 to 21.3)        | 21.3<br>(21.3 to 21.3)          | 21.3<br>(21.3 to 21.3)        | 21.3<br>(21.3 to 21.3)    | 21.3<br>(21.3 to 21.3)              | 21.3<br>(21.3 to 21.3)          | 21.3<br>(21.3 to 21.3)    |                     |      |          |                                     |          |  |         |  |  |  |  |  |  |  |  |  |  |  |
| <b>Tetanus</b>                                                            | 0.2<br>(0.2 to 0.3)             | 0.2<br>(0.1 to 0.3)             | -9.1<br>(-9.1 to -9.1)    | 0.2<br>(0.2 to 0.2)                 | -0.2<br>(-0.2 to -0.2)       | 0.2<br>(0.2 to 0.2)       | -0.2<br>(-0.2 to -0.2)       | 0.2<br>(0.2 to 0.2)             | -0.2<br>(-0.2 to -0.2)       | 0.2<br>(0.2 to 0.2)                 | 0.2<br>(0.2 to 0.2)               | 0.2<br>(0.2 to 0.2)           | 0.2<br>(0.2 to 0.2)             | 0.2<br>(0.2 to 0.2)           | 0.2<br>(0.2 to 0.2)       | 0.2<br>(0.2 to 0.2)                 | 0.2<br>(0.2 to 0.2)             | 0.2<br>(0.2 to 0.2)       |                     |      |          |                                     |          |  |         |  |  |  |  |  |  |  |  |  |  |  |
| <b>Measles</b>                                                            | 0.3<br>(0.3 to 1.3)             | 0.2<br>(0.2 to 1.3)             | -33.3<br>(-33.3 to -33.3) | 96.2<br>(96.2 to 96.2)              | -96.2<br>(-96.2 to -96.2)    | 0.1<br>(0.1 to 0.1)       | -96.2<br>(-96.2 to -96.2)    | 0.1<br>(0.1 to 0.1)             | -96.2<br>(-96.2 to -96.2)    | 0.1<br>(0.1 to 0.1)                 | 0.1<br>(0.1 to 0.1)               | 0.1<br>(0.1 to 0.1)           | 0.1<br>(0.1 to 0.1)             | 0.1<br>(0.1 to 0.1)           | 0.1<br>(0.1 to 0.1)       | 0.1<br>(0.1 to 0.1)                 | 0.1<br>(0.1 to 0.1)             | 0.1<br>(0.1 to 0.1)       |                     |      |          |                                     |          |  |         |  |  |  |  |  |  |  |  |  |  |  |
| <b>Varicella and herpes zoster</b>                                        | 1.0<br>(0.8 to 1.4)             | 0.9<br>(0.7 to 1.2)             | -11.1<br>(-11.1 to -11.1) | 2.2<br>(2.2 to 2.2)                 | -2.2<br>(-2.2 to -2.2)       | 1.7<br>(1.7 to 1.7)       | -2.2<br>(-2.2 to -2.2)       | 1.7<br>(1.7 to 1.7)             | -2.2<br>(-2.2 to -2.2)       | 1.7<br>(1.7 to 1.7)                 | 1.7<br>(1.7 to 1.7)               | 1.7<br>(1.7 to 1.7)           | 1.7<br>(1.7 to 1.7)             | 1.7<br>(1.7 to 1.7)           | 1.7<br>(1.7 to 1.7)       | 1.7<br>(1.7 to 1.7)                 | 1.7<br>(1.7 to 1.7)             | 1.7<br>(1.7 to 1.7)       |                     |      |          |                                     |          |  |         |  |  |  |  |  |  |  |  |  |  |  |
| <b>Neglected tropical diseases and malaria</b>                            | 1.1<br>(1.0 to 1.3)             | 1.1<br>(1.2 to 1.9)             | 0.0<br>(0.0 to 0.0)       | 1.1<br>(1.1 to 1.1)                 | -0.1<br>(-0.1 to -0.1)       | 1.1<br>(1.1 to 1.1)       | -0.1<br>(-0.1 to -0.1)       | 1.1<br>(1.1 to 1.1)             | -0.1<br>(-0.1 to -0.1)       | 1.1<br>(1.1 to 1.1)                 | 1.1<br>(1.1 to 1.1)               | 1.1<br>(1.1 to 1.1)           | 1.1<br>(1.1 to 1.1)             | 1.1<br>(1.1 to 1.1)           | 1.1<br>(1.1 to 1.1)       | 1.1<br>(1.1 to 1.1)                 | 1.1<br>(1.1 to 1.1)             | 1.1<br>(1.1 to 1.1)       |                     |      |          |                                     |          |  |         |  |  |  |  |  |  |  |  |  |  |  |
| <b>Cysticercosis</b>                                                      | 0.1<br>(0.1 to 0.1)             | 0.1<br>(0.1 to 0.1)             | 0.0<br>(0.0 to 0.0)       | 0.1<br>(0.1 to 0.1)                 | -0.1<br>(-0.1 to -0.1)</     |                           |                              |                                 |                              |                                     |                                   |                               |                                 |                               |                           |                                     |                                 |                           |                     |      |          |                                     |          |  |         |  |  |  |  |  |  |  |  |  |  |  |

|                                      |                                 |                                 |                             |                                   |                                 |                                 |                                 |                                 |                               |                                  |                                 |                               |                                  |                                 |                             |                                 |                                 |                              |
|--------------------------------------|---------------------------------|---------------------------------|-----------------------------|-----------------------------------|---------------------------------|---------------------------------|---------------------------------|---------------------------------|-------------------------------|----------------------------------|---------------------------------|-------------------------------|----------------------------------|---------------------------------|-----------------------------|---------------------------------|---------------------------------|------------------------------|
| Gonococcal infection                 | 0.2<br>(0.1 to 0.2)             | 0.1<br>(0.1 to 0.2)             | 34.0<br>(24.0 to 64.3)      | 0.3<br>(0.2 to 0.3)               | 0.2<br>(0.2 to 0.2)             | 35.5<br>(17.85 to 48.0)         | 0.1<br>(0.1 to 0.1)             | <0.05<br>(0.0 to 0.05)          | 59.3<br>(62.19 to 64.07)      | 0.2<br>(0.2 to 0.2)              | 0.1<br>(0.1 to 0.1)             | 53.8<br>(48.88 to 66.79)      | 0.1<br>(0.1 to 0.1)              | 0.1<br>(0.1 to 0.1)             | 11.7<br>(5.78 to 16.61)     | 0.4<br>(0.3 to 0.5)             | 0.3<br>(0.2 to 0.3)             | 45.2<br>(25.2 to 69.7)       |
| Other sexually transmitted diseases  | 0.1<br>(0.1 to 0.1)             | 0.1<br>(0.1 to 0.1)             | 23.5<br>(138.95 to 2.18)    | 0.2<br>(0.2 to 0.3)               | 0.2<br>(0.1 to 0.2)             | 33.8<br>(48.44 to 16.04)        | <0.05<br>(0.0 to 0.05)          | <0.05<br>(0.0 to 0.05)          | 46.5<br>(64.94 to 17.15)      | 0.1<br>(0.1 to 0.2)              | 0.1<br>(0.0 to 0.1)             | 48.9<br>(70.28 to 27.14)      | 0.1<br>(0.1 to 0.1)              | 0.1<br>(0.1 to 0.1)             | 13.5<br>(36.72 to 14.52)    | 0.3<br>(0.3 to 0.4)             | 0.2<br>(0.2 to 0.3)             | 26.0<br>(46.60 to 2.17)      |
| Hepatitis                            | 2.1<br>(1.9 to 2.3)             | 2.1<br>(2.1 to 2.3)             | 84.1<br>(17.85 to 98.56)    | 4.1<br>(3.8 to 4.2)               | 4.1<br>(4.1 to 5.3)             | 41.1<br>(0.94 to 33.88)         | 4.1<br>(1.4 to 14)              | 4.1<br>(0.6 to 2.2)             | 41.1<br>(3.88 to 48.18)       | 4.1<br>(5.8 to 6.4)              | 4.1<br>(5.5 to 7.5)             | 41.1<br>(12.69 to 23.23)      | 4.1<br>(0.4 to 0.5)              | 4.1<br>(0.7 to 1.0)             | 41.1<br>(47.62 to 19.326)   | 4.1<br>(1.8 to 2.1)             | 4.1<br>(2.5 to 3.3)             | 41.1<br>(28.36 to 75.96)     |
| Acute hepatitis A                    | 0.5<br>(0.2 to 0.9)             | 0.9<br>(0.3 to 1.4)             | 1.1<br>(46.20 to 100.28)    | 1.1<br>(0.5 to 1.6)               | 1.1<br>(0.7 to 2.6)             | 53.8<br>(25.39 to 72.80)        | 0.5<br>(0.1 to 0.6)             | 0.5<br>(0.2 to 0.5)             | 1.1<br>(28.20 to 86.39)       | 0.5<br>(0.6 to 2.7)              | 0.5<br>(0.8 to 5.4)             | 1.1<br>(9.71 to 60.09)        | 0.5<br>(0.1 to 0.9)              | 0.5<br>(0.1 to 0.5)             | 1.1<br>(72.29 to 34.107)    | 0.5<br>(0.3 to 1.1)             | 0.5<br>(0.6 to 1.9)             | 1.1<br>(47.99 to 115.43)     |
| Acute hepatitis B                    | 1.4<br>(1.0 to 1.7)             | 1.4<br>(1.0 to 2.2)             | 1.4<br>(2.55 to 35.58)      | 1.4<br>(1.9 to 3.3)               | 1.4<br>(1.5 to 3.3)             | 4.1<br>(0.7 to 1.6)             | 4.1<br>(1.6 to 7.6)             | 4.1<br>(1.7 to 3.5)             | 4.1<br>(3.1 to 5.3)           | 4.1<br>(2.3 to 5.1)              | 4.1<br>(3.0 to 6.8)             | 4.1<br>(0.2 to 0.4)           | 4.1<br>(0.3 to 0.6)              | 4.1<br>(0.2 to 0.4)             | 4.1<br>(0.7 to 1.5)         | 4.1<br>(0.7 to 1.5)             | 4.1<br>(0.7 to 1.9)             | 4.1<br>(0.15 to 46.51)       |
| Acute hepatitis C                    | 0.1<br>(0.1 to 0.3)             | 0.1<br>(0.1 to 0.6)             | 138.1<br>(44.05 to 233.4)   | 0.1<br>(0.1 to 0.3)               | 0.1<br>(0.1 to 0.3)             | 95.2<br>(44.05 to 166.75)       | 0.1<br>(0.1 to 0.2)             | 0.1<br>(0.1 to 0.2)             | 138.1<br>(56.02 to 239.64)    | 0.1<br>(0.1 to 0.6)              | 0.1<br>(0.1 to 0.1)             | 138.1<br>(25.28 to 172.09)    | 0.1<br>(0.0 to 0.1)              | 0.1<br>(0.0 to 0.2)             | 138.1<br>(89.48 to 198.28)  | 0.1<br>(0.0 to 0.5)             | 0.1<br>(0.0 to 0.5)             | 138.1<br>(52.15 to 197.55)   |
| Other infectious diseases            | 11.4<br>(9.3 to 13.6)           | 11.4<br>(6.3 to 13.0)           | 20.0<br>(46.89 to 30.72)    | 20.0<br>(20.4 to 31)              | 20.0<br>(11.6 to 23.9)          | 20.0<br>(54.03 to 12.66)        | 20.0<br>(9.5 to 30)             | 20.0<br>(3.3 to 7.9)            | 20.0<br>(48.57 to 35.37)      | 20.0<br>(23.6 to 46.2)           | 20.0<br>(23.3 to 29.3)          | 20.0<br>(56.38 to 11.56)      | 20.0<br>(4.0 to 7.0)             | 20.0<br>(2.4 to 5.4)            | 20.0<br>(47.94 to 10.21)    | 20.0<br>(1.6 to 29.2)           | 20.0<br>(7.8 to 19.4)           | 20.0<br>(55.49 to 13.59)     |
| Non-communicable diseases            | 7,449.4<br>(7,539.7 to 7,700.3) | 7,449.4<br>(5,418.5 to 7,884.4) | 7,449.4<br>(29.26 to 22.99) | 7,449.4<br>(11,906.6 to 12,174.7) | 7,449.4<br>(8,864.2 to 7,484.7) | 7,449.4<br>(4,631.9 to 4,261.1) | 7,449.4<br>(2,896.4 to 3,253.5) | 7,449.4<br>(1,178.0 to 1,780.2) | 7,449.4<br>(3,132.2 to 22.84) | 7,449.4<br>(2,151.8 to 15,531.2) | 7,449.4<br>(8,002.5 to 8,974.5) | 7,449.4<br>(4,791.9 to 41.06) | 7,449.4<br>(3,861.3 to 14,555.8) | 7,449.4<br>(4,227.2 to 7,387.6) | 7,449.4<br>(4,794 to 10.21) | 7,449.4<br>(9,330.0 to 6,020.8) | 7,449.4<br>(5,651.6 to 3,984.3) | 7,449.4<br>(4,061.1 to 4.66) |
| Neoplasms                            | 2,477.4<br>(2,415.0 to 2,983.5) | 2,477.4<br>(2,086.0 to 3,227.9) | 11.0<br>(146.80 to 41.42)   | 11.0<br>(8,900.4 to 4,163.4)      | 11.0<br>(2,716.3 to 3,037.3)    | 11.0<br>(32.23 to 26.4)         | 11.0<br>(1,272.2 to 1,354.9)    | 11.0<br>(1,092.5 to 1,265.4)    | 11.0<br>(41.36 to 30.72)      | 11.0<br>(4,564.2 to 6,837.8)     | 11.0<br>(2,968.9 to 3,439.8)    | 11.0<br>(3,864.0 to 26.61)    | 11.0<br>(1,115.9 to 1,269.6)     | 11.0<br>(935.8 to 1,123.1)      | 11.0<br>(20.36 to 3.99)     | 11.0<br>(3,391.0 to 3,866.5)    | 11.0<br>(2,381.0 to 2,891.1)    | 11.0<br>(33.30 to 20.77)     |
| Esophageal cancer                    | 80.4<br>(82.7 to 99.5)          | 142.1<br>(95.9 to 134.5)        | 109.2<br>(5.29 to 41.21)    | 137.8<br>(130.4 to 156.6)         | 137.8<br>(120.7 to 168.6)       | 109.2<br>(15.40 to 12.51)       | 109.2<br>(50.2 to 68.2)         | 109.2<br>(68.5 to 104.0)        | 109.2<br>(18.01 to 64.41)     | 109.2<br>(184.0 to 241.6)        | 109.2<br>(183.6 to 277.0)       | 109.2<br>(13.50 to 21.85)     | 109.2<br>(28.2 to 33.0)          | 109.2<br>(22.5 to 32.0)         | 109.2<br>(1.788 to 10.5)    | 109.2<br>(7.9 to 88.9)          | 109.2<br>(57.0 to 73.2)         | 109.2<br>(31.46 to 11.38)    |
| Stomach cancer                       | 138.8<br>(138.8 to 165.4)       | 138.8<br>(138.8 to 165.4)       | 138.8<br>(49.97 to 41.29)   | 138.8<br>(211.6 to 250.8)         | 138.8<br>(172.5 to 168.6)       | 138.8<br>(59.91 to 40.60)       | 138.8<br>(96.7 to 113.0)        | 138.8<br>(39.3 to 35.1)         | 138.8<br>(52.19 to 40.60)     | 138.8<br>(184.0 to 241.6)        | 138.8<br>(183.6 to 277.0)       | 138.8<br>(13.50 to 21.85)     | 138.8<br>(28.2 to 33.0)          | 138.8<br>(22.5 to 32.0)         | 138.8<br>(1.788 to 10.5)    | 138.8<br>(7.9 to 88.9)          | 138.8<br>(57.0 to 73.2)         | 138.8<br>(31.46 to 11.38)    |
| Liver cancer                         | 27.8<br>(14 to 34.9)            | 48.7<br>(36.9 to 56.3)          | 76.1<br>(30.7 to 108.67)    | 45.1<br>(35.9 to 56.3)            | 63.2<br>(48.5 to 73.1)          | 41.0<br>(6.15 to 60.01)         | 37.5<br>(14.5 to 34.5)          | 30.6<br>(20.4 to 39.7)          | 76.4<br>(9.01 to 115.46)      | 62.6<br>(51.8 to 87.1)           | 89.3<br>(56.3 to 92.6)          | 35.5<br>(15.56 to 67.26)      | 10.3<br>(9.5 to 13.2)            | 18.1<br>(12.7 to 20.7)          | 77.2<br>(16.57 to 104.85)   | 30.4<br>(28.1 to 38.3)          | 43.9<br>(31.2 to 50.1)          | 45.2<br>(1.64 to 67.47)      |
| Liver cancer due to hepatitis B      | 6.2<br>(4.8 to 7.8)             | 24.7<br>(8.8 to 14.8)           | 305.5<br>(39.69 to 172.14)  | 9.8<br>(8.4 to 13.4)              | 31.5<br>(12.4 to 20.4)          | 41.0<br>(13.71 to 115.40)       | 4.0<br>(3.1 to 5.9)             | 4.0<br>(4.9 to 10)              | 29.5<br>(12.14 to 162.33)     | 14.1<br>(1.15 to 21.5)           | 41.6<br>(4.2 to 29.1)           | 20.2<br>(10.35 to 105.99)     | 2.2<br>(1.4 to 2.5)              | 9.3<br>(2.9 to 5.9)             | 37.4<br>(46.08 to 292.28)   | 22.1<br>(4.5 to 7.8)            | 22.1<br>(7.7 to 15.0)           | 22.1<br>(20.54 to 206.16)    |
| Liver cancer due to hepatitis C      | 6.2<br>(4.9 to 7.9)             | 24.7<br>(8.8 to 30.2)           | 305.5<br>(191.34 to 337.78) | 9.8<br>(7.8 to 12.5)              | 31.5<br>(13.6 to 37.7)          | 41.0<br>(13.71 to 115.40)       | 4.0<br>(2.9 to 5.7)             | 4.0<br>(4.9 to 10)              | 29.5<br>(13.6 to 47.24)       | 14.1<br>(1.15 to 21.5)           | 41.6<br>(4.2 to 29.1)           | 20.2<br>(10.35 to 105.99)     | 2.2<br>(1.7 to 1.5)              | 9.3<br>(4.7 to 11.5)            | 37.4<br>(169.44 to 486.06)  | 22.1<br>(4.7 to 8.0)            | 22.1<br>(7.6 to 17.5)           | 22.1<br>(128.95 to 398.72)   |
| Liver cancer due to alcohol use      | 12.9<br>(10.2 to 16.5)          | 9.7<br>(6.7 to 12.3)            | 53.0<br>(21.0 to 87.0)      | 20.2<br>(16.9 to 25.9)            | 20.2<br>(8.2 to 35.3)           | 40.1<br>(60.89 to 20.64)        | 18.7<br>(6.3 to 11.7)           | 18.7<br>(4.2 to 9.5)            | 12.9<br>(52.39 to 26.43)      | 20.2<br>(22.1 to 40.1)           | 18.7<br>(11.1 to 25.4)          | 40.1<br>(43.90 to 4.82)       | 18.7<br>(1.8 to 3.4)             | 18.7<br>(2.0 to 4.0)            | 53.0<br>(42.82 to 24.08)    | 13.0<br>(10.9 to 15.9)          | 13.0<br>(4.1 to 7.5)            | 53.0<br>(48.91 to 40.41)     |
| Liver cancer due to other causes     | 2.1<br>(2.1 to 3.5)             | 2.1<br>(1.7 to 3.2)             | 10.5<br>(3.9 to 6.0)        | 2.1<br>(2.5 to 4.1)               | 2.1<br>(0.8 to 1.6)             | 28.2<br>(51.24 to 4.12)         | 2.1<br>(0.2 to 0.3)             | 2.1<br>(0.4 to 1.0)             | 10.5<br>(6.65 to 1.14)        | 2.1<br>(1.2 to 2.8)              | 2.1<br>(1.3 to 2.2)             | 10.5<br>(1.3 to 2.2)          | 2.1<br>(1.1 to 2.5)              | 2.1<br>(3.4 to 6.9)             | 2.1<br>(4.1 to 6.9)         | 2.1<br>(3.1 to 6.5)             | 2.1<br>(4.2 to 9.1)             | 10.5<br>(4.20 to 32.11)      |
| Larynx cancer                        | 13.0<br>(13.0 to 20.9)          | 13.0<br>(10.0 to 15.7)          | 13.0<br>(34.82 to 15.93)    | 13.0<br>(21.2 to 33.9)            | 13.0<br>(12.9 to 20)            | 13.0<br>(17.31 to 33.65)        | 13.0<br>(10.3 to 17.9)          | 13.0<br>(7.3 to 13.0)           | 13.0<br>(38.70 to 17.56)      | 13.0<br>(36.5 to 63.5)           | 13.0<br>(19.7 to 34.8)          | 13.0<br>(53.09 to 27.80)      | 13.0<br>(2.0 to 4.0)             | 13.0<br>(1.7 to 3.8)            | 13.0<br>(5.9 to 11.9)       | 13.0<br>(4.2 to 10.4)           | 13.0<br>(4.07 to 9.22)          | 13.0<br>(4.07 to 9.22)       |
| Lung, bronchus, and trachea cancer   | 63.4<br>(63.4 to 66.72)         | 49.1<br>(45.5 to 54.07)         | 21.5<br>(28.2 to 14.55)     | 98.9<br>(96.2 to 103.8)           | 20.2<br>(69.2 to 67.9)          | 42.37<br>(42.37 to 31.52)       | 28.2<br>(25.7 to 321.6)         | 28.2<br>(42.7 to 446.1)         | 21.5<br>(42.38 to 26.16)      | 49.1<br>(1.48 to 1,551.2)        | 49.1<br>(668.6 to 845.9)        | 21.5<br>(56.67 to 44.06)      | 21.5<br>(184.9 to 229.4)         | 21.5<br>(170.9 to 211.3)        | 21.5<br>(13.84 to 19.86)    | 21.5<br>(52.7 to 65.1)          | 21.5<br>(43.5 to 55.8)          | 21.5<br>(26.18 to 0.78)      |
| Breast cancer                        | 295.5<br>(247.5 to 344.5)       | 295.5<br>(171.1 to 259.1)       | 295.5<br>(33.21 to 47.33)   | 295.5<br>(296.4 to 295.5)         | 295.5<br>(238.9 to 354.6)       | 295.5<br>(46.80 to 35.97)       | 295.5<br>(8.8 to 2.5)           | 295.5<br>(36.69 to 14.89)       | 295.5<br>(27.2 to 12.5)       | 295.5<br>(1,481.6 to 1,551.2)    | 295.5<br>(668.6 to 845.9)       | 295.5<br>(56.67 to 44.06)     | 295.5<br>(184.9 to 229.4)        | 295.5<br>(170.9 to 211.3)       | 295.5<br>(13.84 to 19.86)   | 295.5<br>(52.7 to 65.1)         | 295.5<br>(43.5 to 55.8)         | 295.5<br>(26.18 to 0.78)     |
| Cervical cancer                      | 40.4<br>(31.7 to 49.2)          | 23.5<br>(15.3 to 27.4)          | 47.3<br>(48.81 to 34.11)    | 47.3<br>(56.2 to 34.11)           | 47.3<br>(28.9 to 45.2)          | 47.3<br>(5.76 to 12.56)         | 47.3<br>(28.9 to 45.2)          | 47.3<br>(5.76 to 12.56)         | 47.3<br>(5.76 to 12.56)       | 47.3<br>(28.9 to 45.2)           | 47.3<br>(5.76 to 12.56)         | 47.3<br>(5.76 to 12.56)       | 47.3<br>(5.76 to 12.56)          | 47.3<br>(5.76 to 12.56)         | 47.3<br>(5.76 to 12.56)     | 47.3<br>(5.76 to 12.56)         | 47.3<br>(5.76 to 12.56)         | 47.3<br>(5.76 to 12.56)      |
| Uterine cancer                       | 16.5<br>(15.5 to 20.7)          | 23.0<br>(17.5 to 26.7)          | 40.6<br>(2.60 to 63.73)     | 25.6<br>(23.9 to 32)              | 25.6<br>(21.6 to 38.4)          | 12.8<br>(21.55 to 31.42)        | 12.8<br>(21.55 to 31.42)        | 12.8<br>(21.55 to 31.42)        | 12.8<br>(21.55 to 31.42)      | 12.8<br>(21.55 to 31.42)         | 12.8<br>(21.55 to 31.42)        | 12.8<br>(21.55 to 31.42)      | 12.8<br>(21.55 to 31.42)         | 12.8<br>(21.55 to 31.42)        | 12.8<br>(21.55 to 31.42)    | 12.8<br>(21.55 to 31.42)        | 12.8<br>(21.55 to 31.42)        | 12.8<br>(21.55 to 31.42)     |
| Prostate cancer                      | 102.5<br>(79.5 to 136.3)        | 133.9<br>(174 to 154.9)         | 133.9<br>(32.00 to 32.75)   | 102.5<br>(111.2 to 189.0)         | 102.5<br>(82.2 to 171.7)        | 102.5<br>(45.75 to 5.97)        | 102.5<br>(75.3 to 154.9)        | 102.5<br>(32.00 to 32.75)       | 102.5<br>(279.3 to 475.5)     | 102.5<br>(183.3 to 382.8)        | 102.5<br>(51.37 to 4.46)        | 102.5<br>(51.37 to 4.46)      | 102.5<br>(51.37 to 4.46)         | 102.5<br>(51.37 to 4.46)        | 102.5<br>(51.37 to 4.46)    | 102.5<br>(51.37 to 4.46)        | 102.5<br>(51.37 to 4.46)        | 102.5<br>(51.37 to 4.46)     |
| Colon and rectum cancer              | 300.9<br>(292.0 to 302.0)       | 246.6<br>(229.0 to 262.0)       | 18.0<br>(24.22 to 37.44)    | 466.3<br>(35.2 to 480.5)          | 466.3<br>(28.2 to 29.87)        | 18.0<br>(15.0 to 180.5)         | 18.0<br>(15.0 to 180.5)         | 18.0<br>(15.0 to 180.5)         | 18.0<br>(15.0 to 180.5)       | 18.0<br>(15.0 to 180.5)          | 18.0<br>(15.0 to 180.5)         | 18.0<br>(15.0 to 180.5)       | 18.0<br>(15.0 to 180.5)          | 18.0<br>(15.0 to 180.5)         | 18.0<br>(15.0 to 180.5)     | 18.0<br>(15.0 to 180.5)         | 18.0<br>(15.0 to 180.5)         | 18.0<br>(15.0 to 180.5)      |
| Mouth cancer                         | 24.6<br>(23.4 to 26.5)          | 26.6<br>(21.4 to 29.2)          | 18.2<br>(18.7 to 18.2)      | 41.3<br>(39.3 to 44.3)            | 39.2<br>(39.3 to 39.2)          | 12.3<br>(33.89 to 3.68)         | 17.2<br>(16.4 to 17.2)          | 17.2<br>(13.4 to 20.6)          | 24.6<br>(28.76 to 21.31)      | 26.6<br>(59.9 to 68.1)           | 26.6<br>(38.2 to 58.7)          | 18.2<br>(43.98 to 26.45)      | 18.2<br>(6.6 to 8.4)             | 18.2<br>(6.1 to 9.4)            | 26.6<br>(7.26 to 22.86)     | 20.2<br>(20.2 to 24)            | 20.2<br>(17.5 to 21.4)          | 26.6<br>(23.07 to 1.42)      |
| Nasopharynx cancer                   | 5.8<br>(4.6 to 7.8)             | 12.6<br>(2.9 to 4.9)            | 10.3<br>(48.21 to 29.73)    | 10.3<br>(8.6 to 14.3)             | 10.3<br>(4.3 to 4.7)            | 10.3<br>(56.93 to 42.24)        | 10.3<br>(12.4 to 48)            | 10.3<br>(12.4 to 48)            | 10.3<br>(12.4 to 48)          | 10.3<br>(12.4 to 48)             | 10.3<br>(12.4 to 48)            | 10.3<br>(12.4 to 48)          | 10.3<br>(12.4 to 48)             | 10.3<br>(12.4 to 48)            | 10.3<br>(12.4 to 48)        | 10.3<br>(12.4 to 48)            | 10.3<br>(12.4 to 48)            | 10.3<br>(12.4 to 48)         |
| Other pharynx cancer                 | 11.5<br>(10.4 to 11.3)          | 12.6<br>(9.4 to 11.3)           | 10.3<br>(20.20 to 21.3)     | 10.3<br>(17.8 to 27.3)            | 10.3<br>(13.76 to 14.3)         | 10.3<br>(13.76 to 14.3)         | 10.3<br>(13.76 to 14.3)         | 10.3<br>(13.76 to 14.3)         | 10.3<br>(13.76 to 14.3)       | 10.3<br>(13.76 to 14.3)          | 10.3<br>(13.76 to 14.3)         | 10.3<br>(13.76 to 14.3)       | 10.3<br>(13.76 to 14.3)          | 10.3<br>(13.76 to 14.3)         | 10.3<br>(13.76 to 14.3)     | 10.3<br>(13.76 to 14.3)         | 10.3<br>(13.76 to 14.3)         | 10.3<br>(13.76 to 14.3)      |
| Gallbladder and biliary tract cancer | 20.2<br>(15.3 to 23.7)          | 14.2<br>(10.3 to 17.7)          | 29.3<br>(39.57 to 11.32)    | 30.3<br>(21.2 to 35.7)            | 30.3<br>(11.3 to 21.3)          | 29.3<br>(51.35 to 28.65)        | 29.3<br>(5.0 to 8.0)            | 29.3<br>(4.0 to 6.0)            | 20.2<br>(17.5 to 27.9)        | 20.2<br>(10.5 to 15.8)           | 20.2<br>(10.5 to 15.8)          | 29.3<br>(43.00 to 10.30)      | 20.2<br>(9.3 to 16.7)            | 20.2<br>(6.5 to 12.2)           | 29.3<br>(40.08 to 10.42)    | 25.3<br>(25.3 to 41)            | 25.3<br>(14.8 to 27.5)          | 29.3<br>(27.80 to 23.20)     |
| Pancreatic cancer                    | 111<br>(109.2 to 116.3)         | 174<br>(114.5 to 131.0)         | 111<br>(132.10 to 17.76)    | 111<br>(170.0 to 180.9)           | 111<br>(143.2 to 164.5)         | 111<br>(18.10 to 5.05)          | 111<br>(57.8 to 60.5)           | 111<br>(61.0 to 71.9)           | 111<br>(2.81 to 21.42)        | 111<br>(20.4 to 102.9)           | 111<br>(183.3 to 192.9)         | 111<br>(2.15 to 19.96)        | 111<br>(50.6 to 97.3)            | 111<br>(4.35 to 18.12)          | 111<br>(139.3 to 157.3)     | 111<br>(118.4 to 143.8)         | 111<br>(119.5 to 9.22)          | 111<br>(                     |

|                                                     |                  |                   |                   |                  |                    |                    |                   |                    |                    |                    |                    |                    |                  |                    |                   |                    |                    |                    |
|-----------------------------------------------------|------------------|-------------------|-------------------|------------------|--------------------|--------------------|-------------------|--------------------|--------------------|--------------------|--------------------|--------------------|------------------|--------------------|-------------------|--------------------|--------------------|--------------------|
| Other pneumonococci                                 | 25               | 17                | -51.6             | 3.6              | 14                 | -42.1              | 2.1               | 10                 | -51.8              | 7.6                | 2.5                | -46.4              | 0.4              | -50.1              | 0.7               | 0.4                | 55.4               |                    |
| (18.3 to 33)                                        | (10.9 to 17.1)   | (-64.4 to 39.07)  | (2.7 to 4.7)      | (0.3 to 0.9)     | (1.1 to 1.9)       | (-71.0 to 33.59)   | (-1.1 to 3.0)     | (0.6 to 1.7)       | (-66.5 to 37.62)   | (-1.2 to 10.7)     | (2.6 to 3.5)       | (-76.52 to 37.10)  | (0.3 to 0.9)     | (-63.91 to 38.74)  | (0.2 to 0.4)      | (0.3 to 0.4)       | (-66.4 to 45.78)   |                    |
| Asthma                                              | 37.9             | 22.5              | -40.6             | 69.0             | 33.7               | -51.0              | 18.2              | 7.9                | -62.6              | 73.6               | 26.3               | -63.2              | 19.7             | -65.5              | 66.5              | 40.3               | 39.2               |                    |
| (30.4 to 44.4)                                      | (17.5 to 29.4)   | (-49.4 to 19.56)  | (55.8 to 79.7)    | (27.4 to 40.2)   | (-57.3 to 36.50)   | (-14.6 to 20.2)    | (6.7 to 9.6)      | (-6.7 to 9.6)      | (-57.3 to 48.92)   | (57.3 to 79.7)     | (2.4 to 31.8)      | (-47.89 to 57.19)  | (13.6 to 26.2)   | (10.0 to 21.7)     | (-43.13 to 37.86) | (47.6 to 56.5)     | (29.1 to 57.2)     | (-50.0 to 9.46)    |
| Interstitial lung disease and pulmonary sarcoidosis | 48.1             | 31.8              | -35.4             | 96.4             | 43.7               | -62.4              | 26.6              | 17.2               | -65.4              | 111.1              | 61.4               | -68.4              | 60.4             | -68.4              | 139.7             | 13.7               | 48.4               |                    |
| (14.8 to 82.9)                                      | (20.3 to 62.8)   | (-18.5 to 271.59) | (22.6 to 49.6)    | (24.7 to 74.8)   | (-34.42 to 190.72) | (10.5 to 24.0)     | (11.4 to 37.2)    | (-26.45 to 245.63) | (37.1 to 84.3)     | (28.9 to 96.1)     | (-45.24 to 152.25) | (3.8 to 13.9)      | (5.6 to 28.9)    | (-12.48 to 21.21)  | (10.9 to 36.4)    | (13.5 to 46.4)     | (-26.71 to 88.20)  |                    |
| Other chronic respiratory diseases                  | 24.4             | 2.7               | -89.0             | 89.0             | 12.5               | -87.0              | 1.5               | -89.0              | 9.0                | 48.5               | 1.5                | -89.0              | 1.5              | -89.0              | 3.2               | 32.2               | 30.2               |                    |
| (20.6 to 29.2)                                      | (2.2 to 3.2)     | (-90.84 to 87.34) | (93.8 to 86.3)    | (54.0 to 8.8)    | (-103.5 to 14.6)   | (-13.8 to 1.9)     | (-13.8 to 1.9)    | (-103.5 to 14.6)   | (-93.8 to 57.8)    | (41.6 to 6.2)      | (-13.8 to 1.9)     | (-93.8 to 57.8)    | (41.6 to 6.2)    | (-93.8 to 57.8)    | (24.0 to 44.1)    | (23.0 to 43)       | (-92.87 to 88.62)  |                    |
| Cirrhosis                                           | 94.1 to 99.6     | (164.6 to 188.4)  | (69.83 to 95.13)  | (168.0 to 177.6) | (154.0 to 177.6)   | (104.4 to 123.2)   | (89.83 to 124.80) | (65.8 to 68.0)     | (202.2 to 213.0)   | (174.0 to 173.8)   | (154.0 to 177.6)   | (154.0 to 177.6)   | (154.0 to 177.6) | (154.0 to 177.6)   | (154.0 to 177.6)  | (154.0 to 177.6)   | (154.0 to 177.6)   | (154.0 to 177.6)   |
| Cirrhosis due to hepatitis B                        | 10.7             | 18.3              | 80.9              | 18.0             | 26.7               | 48.0               | 5.1               | 10.1               | 76.8               | 21.5               | 30.3               | 41.8               | 4.5              | 8.3                | 14.9              | 23.1               | 58.3               |                    |
| (8.7 to 12.7)                                       | (4.7 to 22.8)    | (38.83 to 123.81) | (15.7 to 22.8)    | (15.7 to 22.8)   | (15.7 to 22.8)     | (15.7 to 22.8)     | (15.7 to 22.8)    | (15.7 to 22.8)     | (15.7 to 22.8)     | (15.7 to 22.8)     | (15.7 to 22.8)     | (15.7 to 22.8)     | (15.7 to 22.8)   | (15.7 to 22.8)     | (15.7 to 22.8)    | (15.7 to 22.8)     | (15.7 to 22.8)     | (15.7 to 22.8)     |
| Cirrhosis due to hepatitis C                        | 82.9             | 12.9              | -107.9            | 159.3            | 48.2               | -107.9             | 159.3             | 48.2               | -107.9             | 159.3              | 48.2               | -107.9             | 159.3            | 48.2               | -107.9            | 159.3              | 48.2               | -107.9             |
| (32.6 to 41.2)                                      | (7.3 to 19.2)    | (-94.4 to 161.17) | (58.2 to 74.4)    | (108.8 to 137.1) | (99.31 to 114.12)  | (15.0 to 22.4)     | (40.0 to 55.8)    | (105.55 to 221.20) | (65.8 to 81.1)     | (12.9 to 168.2)    | (64.82 to 157.11)  | (14.9 to 21.2)     | (29.6 to 40.3)   | (50.00 to 141.77)  | (58.7 to 73.0)    | (84.2 to 115.9)    | (24.33 to 101.93)  |                    |
| Cirrhosis due to alcohol use                        | 40.4             | 29.7              | -74.6             | 70.2             | 42.7               | -74.6              | 70.2              | 42.7               | -74.6              | 70.2               | 42.7               | -74.6              | 70.2             | 42.7               | -74.6             | 70.2               | 42.7               | -74.6              |
| (35.7 to 44.8)                                      | (34.4 to 59.7)   | (-81.6 to 78.7)   | (61.6 to 78.7)    | (61.6 to 78.7)   | (61.6 to 78.7)     | (61.6 to 78.7)     | (61.6 to 78.7)    | (61.6 to 78.7)     | (61.6 to 78.7)     | (61.6 to 78.7)     | (61.6 to 78.7)     | (61.6 to 78.7)     | (61.6 to 78.7)   | (61.6 to 78.7)     | (61.6 to 78.7)    | (61.6 to 78.7)     | (61.6 to 78.7)     | (61.6 to 78.7)     |
| Cirrhosis due to other causes                       | 9.6              | 23.4              | 346.4             | 18.3             | 37.1               | 105.5              | 5.1               | 13.7               | 173.4              | 20.1               | 44.2               | 12.6               | 4.5              | 9.7                | 16.6              | 40.0               | 83.5               |                    |
| (8.1 to 11.1)                                       | (20.1 to 26.9)   | (95.6 to 195.192) | (16.0 to 21.5)    | (32.0 to 42.6)   | (62.0 to 141.96)   | (0.0 to 6.5)       | (10.0 to 17.2)    | (10.0 to 17.2)     | (10.0 to 17.2)     | (10.0 to 17.2)     | (10.0 to 17.2)     | (10.0 to 17.2)     | (10.0 to 17.2)   | (10.0 to 17.2)     | (10.0 to 17.2)    | (10.0 to 17.2)     | (10.0 to 17.2)     | (10.0 to 17.2)     |
| Digestive diseases                                  | 188.6            | 35.6              | -38.9             | 97.1             | 41.4               | -38.9              | 97.1              | 41.4               | -38.9              | 97.1               | 41.4               | -38.9              | 97.1             | 41.4               | -38.9             | 97.1               | 41.4               | -38.9              |
| (181.4 to 215.4)                                    | (168.3 to 223.8) | (-13.73 to 13.96) | (276.8 to 328.6)  | (199.8 to 260.8) | (-32.75 to 13.34)  | (81.4 to 102.1)    | (79.9 to 117.0)   | (-10.52 to 29.46)  | (298.5 to 372.9)   | (215.2 to 307.4)   | (-35.32 to 7.81)   | (93.9 to 121.5)    | (82.3 to 115.4)  | (-21.46 to 7.76)   | (241.6 to 310.8)  | (170.5 to 238.5)   | (-36.58 to 12.27)  |                    |
| Peptic ulcer disease                                | 58.4             | 25.6              | -38.9             | 97.1             | 41.4               | -38.9              | 97.1              | 41.4               | -38.9              | 97.1               | 41.4               | -38.9              | 97.1             | 41.4               | -38.9             | 97.1               | 41.4               | -38.9              |
| (49.4 to 68.4)                                      | (28.3 to 47.9)   | (-50.39 to 17.47) | (74.3 to 101.9)   | (31.0 to 54.2)   | (-61.57 to 13.34)  | (14.7 to 30.2)     | (5.1 to 34.3)     | (-10.52 to 29.46)  | (298.5 to 372.9)   | (215.2 to 307.4)   | (-35.32 to 7.81)   | (93.9 to 121.5)    | (82.3 to 115.4)  | (-21.46 to 7.76)   | (241.6 to 310.8)  | (170.5 to 238.5)   | (-36.58 to 12.27)  |                    |
| Gastritis and duodenitis                            | 2.1              | 3.1               | 54.7              | 3.5              | 4.2                | 22.7               | 1.1               | 1.9                | 74.2               | 4.3                | 5.6                | 33.7               | 0.9              | 1.2                | 3.9               | 2.9                | 7.7                |                    |
| (1.5 to 3.4)                                        | (1.5 to 3.4)     | (1.1 to 104.32)   | (2.6 to 5.7)      | (2.6 to 5.7)     | (1.86 to 158.54)   | (0.7 to 2.0)       | (0.9 to 2.0)      | (-1.9 to 5.6)      | (74.2 to 7.7)      | (2.7 to 7.7)       | (2.6 to 8.0)       | (20.59 to 39.99)   | (0.5 to 1.8)     | (0.6 to 2.1)       | (1.13 to 17.65)   | (1.5 to 5.5)       | (1.4 to 9.4)       | (-2.73 to 37.06)   |
| Appendicitis                                        | 36.4             | 23.6              | -46.3             | 46.3             | 24.8               | -46.3              | 46.3              | 24.8               | -46.3              | 46.3               | 24.8               | -46.3              | 46.3             | 24.8               | -46.3             | 46.3               | 24.8               | -46.3              |
| (3.8 to 61.1)                                       | (2.8 to 6.1)     | (-47.91 to 26.40) | (7.0 to 11.1)     | (6.1 to 8.3)     | (-57.5 to 9.31)    | (1.7 to 3.2)       | (1.4 to 4.1)      | (-4.78 to 55.99)   | (47.8 to 55.99)    | (6.7 to 12.8)      | (4.2 to 11.5)      | (59.45 to 9.65)    | (1.8 to 3.4)     | (1.1 to 2.9)       | (55.88 to 5.92)   | (6.2 to 11.1)      | (1.1 to 2.9)       | (-46.84 to 19.68)  |
| Paralytic ileus and intestinal obstruction          | 12.1 to 24.8     | (12.7 to 30.4)    | (-9.3 to 79.49)   | (18.2 to 37.2)   | (4.6 to 14.2)      | (-22.32 to 115.29) | (4.7 to 12.5)     | (-22.32 to 115.29) | (4.7 to 12.5)      | (-22.32 to 115.29) | (4.7 to 12.5)      | (-22.32 to 115.29) | (4.7 to 12.5)    | (-22.32 to 115.29) | (4.7 to 12.5)     | (-22.32 to 115.29) | (4.7 to 12.5)      | (-22.32 to 115.29) |
| Inguinal, femoral, and abdominal hernia             | 11.1             | 8.6               | -3.3              | 13.4             | 9.5                | -27.1              | 4.3               | 11.2               | 15.7               | 34.4               | 11.2               | -24.5              | 4.4              | 11.7               | 9.6               | 11.7               | 27.0               |                    |
| (6.6 to 15.1)                                       | (3.9 to 21.5)    | (-58.7 to 185.27) | (9.7 to 19.3)     | (4.4 to 22.5)    | (-64.88 to 104.63) | (2.5 to 6.3)       | (1.7 to 4.2)      | (-59.39 to 309.13) | (9.7 to 19.3)      | (4.4 to 22.5)      | (-64.88 to 104.63) | (2.5 to 6.3)       | (1.7 to 4.2)     | (-59.39 to 309.13) | (9.7 to 19.3)     | (4.4 to 22.5)      | (-64.88 to 104.63) |                    |
| Inflammatory bowel disease                          | 11.4 to 19.1     | (11.4 to 19.1)    | (-13.6 to 29.79)  | (13.6 to 29.79)  | (13.6 to 29.79)    | (-13.6 to 29.79)   | (13.6 to 29.79)   | (-13.6 to 29.79)   | (13.6 to 29.79)    | (13.6 to 29.79)    | (-13.6 to 29.79)   | (13.6 to 29.79)    | (-13.6 to 29.79) | (13.6 to 29.79)    | (-13.6 to 29.79)  | (13.6 to 29.79)    | (-13.6 to 29.79)   |                    |
| Vascular intestinal disorders                       | 14.7 to 35.0     | (17.1 to 44.1)    | (-11.43 to 78.64) | (21.7 to 51.7)   | (20.3 to 50.8)     | (-29.12 to 37.56)  | (4.6 to 20.4)     | (-29.12 to 37.56)  | (4.6 to 20.4)      | (-29.12 to 37.56)  | (4.6 to 20.4)      | (-29.12 to 37.56)  | (4.6 to 20.4)    | (-29.12 to 37.56)  | (4.6 to 20.4)     | (-29.12 to 37.56)  | (4.6 to 20.4)      | (-29.12 to 37.56)  |
| Gallbladder and biliary diseases                    | 10.0 to 15.9     | (12.3 to 21.4)    | (-3.2 to 19.66)   | (14.7 to 23.5)   | (14.1 to 23.9)     | (-26.46 to 46.05)  | (4.1 to 9.9)      | (4.8 to 10.3)      | (-21.85 to 113.39) | (14.8 to 24.9)     | (15.2 to 26.2)     | (-43.62 to 50.43)  | (4.4 to 10.0)    | (3.9 to 12.0)      | (-13.39 to 36.98) | (13.5 to 24.8)     | (13.7 to 24.0)     | (-33.73 to 10.11)  |
| Pancreatitis                                        | 16.4             | 10.3              | -27.4             | 16.4             | 27.4               | -27.4              | 16.4              | 27.4               | -27.4              | 16.4               | 27.4               | -27.4              | 16.4             | 27.4               | -27.4             | 16.4               | 27.4               | -27.4              |
| (12.9 to 21.4)                                      | (13.3 to 23.8)   | (-13.48 to 34.96) | (21.7 to 35.6)    | (18.0 to 31.6)   | (-29.47 to 7.65)   | (6.5 to 12.6)      | (7.1 to 14.7)     | (-9.34 to 57.23)   | (24.3 to 47.2)     | (24.3 to 47.2)     | (-21.0 to 24.7)    | (5.2 to 10.6)      | (4.6 to 10.7)    | (-2.74 to 35.83)   | (15.1 to 25.0)    | (13.9 to 31.4)     | (-39.9 to 14.7)    |                    |
| Other digestive diseases                            | 27.9 to 39.2     | (27.9 to 39.2)    | (-1.62 to 49.64)  | (31.0 to 45.1)   | (31.0 to 45.1)     | (-1.62 to 49.64)   | (31.0 to 45.1)    | (31.0 to 45.1)     | (-1.62 to 49.64)   | (31.0 to 45.1)     | (31.0 to 45.1)     | (-1.62 to 49.64)   | (31.0 to 45.1)   | (31.0 to 45.1)     | (-1.62 to 49.64)  | (31.0 to 45.1)     | (31.0 to 45.1)     | (-1.62 to 49.64)   |
| Neurological disorders                              | 157.4 to 412.1   | (157.4 to 412.1)  | (157.4 to 412.1)  | (157.4 to 412.1) | (157.4 to 412.1)   | (157.4 to 412.1)   | (157.4 to 412.1)  | (157.4 to 412.1)   | (157.4 to 412.1)   | (157.4 to 412.1)   | (157.4 to 412.1)   | (157.4 to 412.1)   | (157.4 to 412.1) | (157.4 to 412.1)   | (157.4 to 412.1)  | (157.4 to 412.1)   | (157.4 to 412.1)   | (157.4 to 412.1)   |
| Alzheimer disease and other dementias               | 292.5            | 300.1             | -90.6             | 300.1            | 300.1              | -90.6              | 300.1             | 300.1              | -90.6              | 300.1              | 300.1              | -90.6              | 300.1            | 300.1              | -90.6             | 300.1              | 300.1              | -90.6              |
| (211.4 to 253.8)                                    | (276.3 to 327.0) | (-15.20 to 40.80) | (273.1 to 326.8)  | (265.3 to 311.1) | (-14.31 to 6.87)   | (84.9 to 104.8)    | (126.6 to 156.5)  | (30.44 to 44.41)   | (323.5 to 401.0)   | (297.0 to 365.4)   | (20.16 to 34.84)   | (131.0 to 157.9)   | (141.5 to 180.2) | (-1.76 to 40.41)   | (231.1 to 304.8)  | (227.6 to 278.0)   | (-22.7 to 14.83)   |                    |
| Parkinson disease                                   | 31.2 to 45.2     | (31.2 to 45.2)    | (-5.0 to 40.82)   | (31.2 to 45.2)   | (31.2 to 45.2)     | (-5.0 to 40.82)    | (31.2 to 45.2)    | (31.2 to 45.2)     | (-5.0 to 40.82)    | (31.2 to 45.2)     | (31.2 to 45.2)     | (-5.0 to 40.82)    | (31.2 to 45.2)   | (31.2 to 45.2)     | (-5.0 to 40.82)   | (31.2 to 45.2)     | (31.2 to 45.2)     | (-5.0 to 40.82)    |
| Epilepsy                                            | 32.4 to 39.5     | (22.5 to 32.8)    | (-29.54 to 1.10)  | (61.6 to 83.0)   | (42.3 to 61.7)     | (-37.23 to 12.53)  | (16.4 to 25.0)    | (13.0 to 21.6)     | (-30.50 to 31.4)   | (69.8 to 106.2)    | (49.2 to 81.2)     | (-37.93 to 11.1)   | (10.7 to 16.2)   | (8.0 to 13.3)      | (-38.28 to 0.06)  | (44.4 to 67.6)     | (30.0 to 49.5)     | (-43.96 to 11.09)  |
| Multiple sclerosis                                  | 21.1             | 34.3              | -13.2             | 34.3             | 10.3               | -13.2              | 34.3              | 10.3               | -13.2              | 34.3               | 10.3               | -13.2              | 34.3             | 10.3               | -13.2             | 34.3               | 10.3               | -13.2              |
| (14.4 to 32.9)                                      | (16.1 to 33.3)   | (-24.68 to 31.76) | (26.8 to 59.8)    | (23.7 to 49.2)   | (-38.34 to 6.95)   | (4.4 to 14.2)      | (4.8 to 14.7)     | (-48.89 to 36.09)  | (16.5 to 53.5)     | (11.4 to 44.5)     | (-58.37 to 10.5)   | (8.5 to 26.0)      | (8.6 to 26.0)    | (-31.78 to 35.60)  | (29.9 to 72.1)    | (25.1 to 64.9)     | (-42.85 to 11.28)  |                    |
| Other neurological disorders                        | 57.9             | 59.8              | 4.2               | 59.8             | 94.5               | -34.3              | 94.5              | 35.3               | -34.3              | 94.5               | 35.3               | -34.3              | 94.5             | 35.3               | -34.3             | 94.5               | 35.3               | -34.3              |
| (50.1 to 105.6)                                     | (51.1 to 102.6)  | (-4.41 to 132.0)  | (96.3 to 120.9)   | (96.3 to 120.9)  | (-4.41 to 132.0)   | (22.3 to 38.2)     | (27.8 to 38.2)    | (-4.41 to 132.0)   | (96.3 to 120.9)    | (96.3 to 120.9)    | (-4.41 to 132.0)   | (96.3 to 120.9)    | (96.3 to 120.9)  | (-4.41 to 132.0)   | (96.3 to 120.9)   | (96.3 to 120.9)    | (96.3 to 120.9)    | (-4.41 to 132.0)   |
| Mental and substance use disorders                  | 45.4             | 94.7              | 94.0              | 99.5             | 117.2              | 94.0               | 99.5              | 117.2              | 94.0               | 99.5               | 117.2              | 94.0               | 99.5             | 117.2              | 94.0              | 99.5               | 117.2              | 94.0               |
| (40.4 to 68.3)                                      | (73.2 to 105.6)  | (8.92 to 121.30)  | (90.7 to 138.6)   | (136.7 to 196.1) | (-0.38 to 104.99)  | (48.4 to 82.0)     | (30.9 to 51.7)    | (-11.76 to 155.28) | (125.8 to 209.8)   | (165.8 to 309.2)   | (-17.66 to 135.81) | (12.5 to 20.4)     | (18.4 to 28.8)   | (25.16 to 46.91)   | (84.4 to 78.9)    | (67.1 to 104.4)    | (33.9 to 32.86)    |                    |
| Schizophrenia                                       | 14.3 to 2.0      | (0.7 to 1.3)      | (-6.02 to 9.72)   | (1.8 to 1.1)     | (0.9 to 1.6)       | (-67.99 to 26.79)  | (0.4 to 1.0)      | (0.3 to 0.7)       | (-68.38 to 7.57)   | (1.6 to 3.7)       | (0.8 to 2.0)       | (-75.60 to 37.24)  | (0.6 to 1.0)     | (0.4 to 0.7)       | (-56.81 to 6.89)  | (1.6 to 2.6)       | (0.8 to 1.4)       | (-64.44 to 31.54)  |
| Alcohol use disorders                               | 11.3 to 23.4     | (11.3 to 23.4)    | (-21.79 to 82.37) | (21.4 to 45.1)   | (18.7 to 44.9)     | (-94.80 to 52.47)  | (7.6 to 16.9)     | (5.9 to 17.3)      | (-94.83 to 101.11) | (28.8 to 66.0)     | (15.3 to 96.8)     | (-45.00 to 68.41)  | (2.7 to 10.5)    | (3.2 to 13.3)      | (-6.33 to 79.11)  | (10.3 to 29.1)     | (10.1 to 41.8)     | (-20.83 to 48.35)  |
| Drug use disorders                                  | 30.2 to 45.6     | (55.2 to 80.0)    | (10.72 to 137.47) | (108.5 to 155.6) | (40.3 to 65.8)     | (-7.87 to 190.92)  | (17.1 to 37.9)    | (15.2 to 25.2)     | (-89.9 to 172.98)  | (89.9 to 155.6)    | (59.2 to 96.8)     | (-11.89 to 172.98) | (18.1 to 9.4)    | (12.2 to 16.6)     | (33.3 to 38.7)    | (46.8 to 39.9)     | (-47.42 to 80.55)  |                    |
| Opioioid use disorders                              | 11.4             | 26.8              | 340.0             | 23.6             | 23.6               | 340.0              | 23.6              | 23.6               | 340.0              | 23.6               | 23.6               | 340.0              | 23.6             | 23.6               | 340.0             | 23.6               | 23.6               | 340.0              |
| (10.2 to 12.6)                                      | (20.0 to 33.9)   | (18.13 to 164.19) | (21.3 to 32.9)    | (35.3 to 46.9)   | (7.3 to 32.9)      | (-10.07 to 131.3)  | (7.3 to 32.9)     | (7.3 to 32.9)      | (-10.07 to 131.3)  | (35.3 to 46.9)     | (35.3 to 46.9)     | (-10.07 to 131.3)  | (7.3 to 32.9)    | (7.3 to            |                   |                    |                    |                    |



|                                       |                            |                            |                            |                            |                           |                            |                           |                           |                            |                           |                           |                           |                          |                           |                            |                         |                           |                            |
|---------------------------------------|----------------------------|----------------------------|----------------------------|----------------------------|---------------------------|----------------------------|---------------------------|---------------------------|----------------------------|---------------------------|---------------------------|---------------------------|--------------------------|---------------------------|----------------------------|-------------------------|---------------------------|----------------------------|
| Rheumatoid arthritis                  | 18.3<br>(14.7 to 20.7)     | 9.3<br>(7.2 to 11.0)       | 49.2<br>(59.1 to 40.1)     | 26.9<br>(21.8 to 30.0)     | 10.9<br>(8.5 to 13.0)     | 59.2<br>(47.2 to 52.57)    | 4.2<br>(0.9 to 6.2)       | 2.8<br>(0.1 to 3.8)       | 31.2<br>(42.1 to 31.2)     | 14.6<br>(10.0 to 19.1)    | 7.4<br>(3.9 to 10.2)      | 48.4<br>(70.8 to 20.1)    | 14.2<br>(11.1 to 18.8)   | 6.4<br>(4.5 to 9.9)       | 54.2<br>(46.7 to 43.6)     | 28.1 to 40.5            | 13.9<br>(9.8 to 18.9)     | 61.5<br>(71.8 to 52.9)     |
| Other musculoskeletal disorders       | 14.8<br>(13.6 to 18.7)     | 14.8<br>(11.5 to 18.1)     | 0.4<br>(32.1 to 19.48)     | 25.7<br>(23.5 to 32.0)     | 20.5<br>(16.3 to 25.0)    | 19.7<br>(41.9 to 4.56)     | 5.5<br>(4.3 to 8.1)       | 5.6<br>(3.3 to 7.1)       | 9.0<br>(35.3 to 29.57)     | 20.6<br>(16.1 to 30.2)    | 16.4<br>(9.9 to 20.7)     | 19.7<br>(48.3 to 20.11)   | 9.3<br>(8.5 to 11.5)     | 9.2<br>(6.2 to 13.4)      | 0.7<br>(2.1 to 21.88)      | 9.8<br>(28.1 to 36.2)   | 34.5<br>(17.7 to 30.7)    | 14.9<br>(48.9 to 1.24)     |
| Other non-communicable diseases       | 242<br>(206.3 to 246.8)    | 242<br>(116.0 to 163.6)    | 0.4<br>(51.39 to 26.11)    | 25.3<br>(55.0 to 404.8)    | 86.0<br>(272.0 to 404.8)  | 37.1<br>(57.43 to 31.76)   | 46.4<br>(110.7 to 137.3)  | 54.1<br>(71.8 to 86.9)    | 51.1<br>(54.30 to 28.51)   | 47.4<br>(57.6 to 40.5)    | 27.3<br>(283.3 to 40.5)   | 40.8<br>(59.18 to 34.0)   | 72.3<br>(89.0 to 116.7)  | 46.0<br>(54.6 to 102.5)   | 38.9<br>(43.03 to 22.61)   | 27.3<br>(47.5 to 63.7)  | 388.9<br>(249.3 to 391.3) | 45.0<br>(56.79 to 28.82)   |
| Congenital anomalies                  | 158.3<br>(151.1 to 170.5)  | 100.0<br>(84.4 to 119.8)   | 428.6<br>(46.52 to 24.29)  | 254.3<br>(408.3 to 462.3)  | 86.0<br>(211.5 to 308.6)  | 37.1<br>(58.19 to 47.92)   | 46.4<br>(79.5 to 94.9)    | 54.1<br>(64.9 to 65.7)    | 51.1<br>(47.12 to 24.31)   | 47.4<br>(42.4 to 509.0)   | 27.3<br>(22.1 to 382.6)   | 40.8<br>(50.51 to 27.83)  | 72.3<br>(86.6 to 80.3)   | 46.0<br>(37.5 to 96.3)    | 38.9<br>(47.21 to 23.40)   | 27.3<br>(50.2 to 44.6)  | 388.9<br>(191.0 to 292.5) | 45.0<br>(51.15 to 27.48)   |
| Neural tube defects                   | 10.4<br>(9.2 to 13.2)      | 10.4<br>(3.7 to 6.2)       | 0.4<br>(9.9 to 16.6)       | 25.3<br>(9.9 to 36.6)      | 86.0<br>(25.0 to 36.6)    | 37.1<br>(68.59 to 40.65)   | 46.4<br>(9.9 to 16.6)     | 54.1<br>(1.6 to 2.9)      | 51.1<br>(65.49 to 40.31)   | 47.4<br>(19.7 to 31.0)    | 27.3<br>(80.0 to 15.2)    | 40.8<br>(66.72 to 32.91)  | 72.3<br>(2.9 to 7.8)     | 46.0<br>(2.0 to 3.7)      | 38.9<br>(2.9 to 3.0)       | 27.3<br>(2.9 to 3.0)    | 388.9<br>(10.6 to 20.4)   | 45.0<br>(70.54 to 41.88)   |
| Congenital heart anomalies            | 78.9<br>(74.9 to 85.2)     | 38.9<br>(32.0 to 45.2)     | 50.0<br>(57.93 to 42.24)   | 209.9<br>(196.2 to 216.7)  | 97.0<br>(161.0 to 45.21)  | 55.7<br>(61.0 to 29.42)    | 45.1<br>(80.4 to 48.2)    | 21.1<br>(20.8 to 25.3)    | 22.8<br>(59.14 to 43.10)   | 22.8<br>(20.8 to 25.3)    | 10.7<br>(87.7 to 125.8)   | 44.5<br>(42.05 to 50.04)  | 7.8<br>(31.8 to 10.4)    | 11.6<br>(14.5 to 11.6)    | 49.4<br>(58.28 to 49.81)   | 90.2<br>(71.9 to 21.9)  | 90.2<br>(71.9 to 21.9)    | 52.7<br>(41.43 to 41.6)    |
| Cleft lip and cleft palate            | 0.2<br>(0.1 to 0.4)        | <0.05<br>(0.0 to 0.1)      | <0.05<br>(40.7 to 40.00)   | <0.05<br>(0.3 to 1.2)      | <0.05<br>(0.1 to 0.3)     | <0.05<br>(91.10 to 41.39)  | <0.05<br>(0.1 to 0.3)     | <0.05<br>(0.0 to 0.1)     | <0.05<br>(93.88 to 24.70)  | <0.05<br>(0.3 to 1.9)     | <0.05<br>(0.0 to 0.4)     | <0.05<br>(49.55 to 26.40) | <0.05<br>(0.0 to 0.2)    | <0.05<br>(0.0 to 0.05)    | <0.05<br>(49.00 to 38.43)  | <0.05<br>(0.2 to 1.0)   | <0.05<br>(0.0 to 0.2)     | <0.05<br>(49.21 to 39.93)  |
| Down syndrome                         | 4.0 to 6.7<br>(4.5 to 8.8) | 4.0 to 6.7<br>(4.5 to 8.8) | 0.4<br>(8.9 to 15.4)       | 11.6<br>(8.6 to 17.3)      | 11.6<br>(29.59 to 85.77)  | 11.6<br>(1.8 to 3.3)       | 11.6<br>(1.9 to 4.5)      | 11.6<br>(37.04 to 86.97)  | 11.6<br>(8.7 to 17.7)      | 11.6<br>(37.04 to 86.97)  | 11.6<br>(1.9 to 4.5)      | 11.6<br>(47.77 to 61.35)  | 11.6<br>(1.9 to 4.7)     | 11.6<br>(30.82 to 94.52)  | 11.6<br>(7.7 to 16.8)      | 11.6<br>(7.7 to 16.8)   | 11.6<br>(1.9 to 4.7)      | 11.6<br>(4.37 to 67.93)    |
| Chromosomal unbalanced rearrangements | 7.0<br>(5.2 to 9.7)        | 7.0<br>(5.2 to 9.7)        | 0.4<br>(24.0 to 47.78)     | 19.8<br>(16.2 to 27.1)     | 20.7<br>(14.6 to 27.4)    | 6.0<br>(26.52 to 46.28)    | 2.6<br>(0.0 to 2.4)       | 3.1<br>(30.9 to 7.5)      | 18.1<br>(13.9 to 21.3)     | 18.1<br>(10.8 to 26.4)    | 15.1<br>(32.82 to 18.47)  | 15.1<br>(31.1 to 6.7)     | 15.1<br>(2.8 to 18.6)    | 15.1<br>(30.88 to 43.10)  | 15.1<br>(2.8 to 18.6)      | 15.1<br>(15.5 to 26.6)  | 15.1<br>(15.5 to 26.6)    | 15.1<br>(12.92 to 39.87)   |
| Other congenital anomalies            | 56.9<br>(52.8 to 61.3)     | 36.9<br>(33.9 to 51.6)     | 58.6<br>(40.67 to 9.29)    | 158.4<br>(146.9 to 171.0)  | 26.9<br>(88.7 to 137.5)   | 109.7<br>(44.43 to 12.94)  | 12.4<br>(28.8 to 36.0)    | 179.7<br>(193.5 to 30.7)  | 30.1<br>(193.5 to 30.7)    | 12.4<br>(163.2 to 197.5)  | 30.1<br>(100.2 to 160.8)  | 17.4<br>(44.15 to 11.28)  | 17.4<br>(20.9 to 27.4)   | 17.4<br>(13.6 to 22.2)    | 17.4<br>(43.83 to 4.65)    | 17.4<br>(13.8 to 155.8) | 17.4<br>(72.0 to 120.3)   | 17.4<br>(47.19 to 12.85)   |
| Skin and subcutaneous diseases        | 30.6<br>(10.0 to 13.3)     | 30.6<br>(12.1 to 18.6)     | 0.4<br>(4.31 to 20.3)      | 26.9<br>(15.1 to 20.3)     | 26.9<br>(40.0 to 7.4)     | 26.9<br>(14.90 to 108.15)  | 26.9<br>(13.0 to 20.1)    | 26.9<br>(38.15 to 45.69)  | 26.9<br>(10.0 to 20.1)     | 26.9<br>(13.0 to 20.1)    | 26.9<br>(38.15 to 45.69)  | 26.9<br>(7.5 to 11.9)     | 26.9<br>(16.0 to 20.9)   | 26.9<br>(16.0 to 20.9)    | 26.9<br>(1.98 to 74.39)    | 26.9<br>(16.0 to 20.9)  | 26.9<br>(16.0 to 20.9)    | 26.9<br>(20.98 to 41.42)   |
| Cellulitis                            | 3.3<br>(2.7 to 5.0)        | 6.9<br>(4.0 to 8.7)        | 119.5<br>(16.17 to 204.54) | 5.2<br>(4.3 to 7.7)        | 8.0<br>(4.7 to 10.0)      | 62.0<br>(36.0 to 122.53)   | 1.3<br>(1.1 to 2.0)       | 2.7<br>(1.4 to 3.5)       | 106.6<br>(26.66 to 195.01) | 5.0<br>(4.1 to 7.5)       | 7.1<br>(3.8 to 9.2)       | 47.5<br>(47.38 to 19.66)  | 2.0<br>(2.2 to 10.6)     | 4.3<br>(2.2 to 10.6)      | 130.1<br>(11.27 to 302.67) | 4.1<br>(6.1 to 10.0)    | 4.3<br>(4.7 to 21.2)      | 7.5<br>(25.79 to 160.05)   |
| Psoriasis                             | 1.0<br>(0.8 to 1.4)        | 2.8<br>(4.4 to 8.4)        | 50.1<br>(225.52 to 767.75) | 7.3<br>(1.5 to 2.4)        | 2.8<br>(5.3 to 9.8)       | 50.1<br>(130.11 to 488.36) | 7.3<br>(0.4 to 0.7)       | 2.8<br>(1.6 to 3.4)       | 50.1<br>(45.52 to 644.00)  | 7.3<br>(1.5 to 2.4)       | 2.8<br>(4.4 to 9.3)       | 50.1<br>(73.05 to 421.22) | 7.3<br>(0.4 to 0.7)      | 2.8<br>(2.5 to 5.5)       | 50.1<br>(305.15 to 976.97) | 7.3<br>(1.3 to 2.1)     | 7.3<br>(5.3 to 11.1)      | 50.1<br>(179.32 to 629.55) |
| Decubitus ulcer                       | 4.3 to 5.9<br>(2.0 to 3.6) | 2.8<br>(2.2 to 3.9)        | 50.1<br>(71.42 to 46.07)   | 7.3<br>(6.0 to 8.3)        | 2.8<br>(6.0 to 8.3)       | 50.1<br>(61.12 to 42.27)   | 7.3<br>(1.1 to 1.9)       | 2.8<br>(2.6 to 1.3)       | 50.1<br>(41.2 to 4.27)     | 7.3<br>(1.1 to 1.9)       | 2.8<br>(4.1 to 6.3)       | 50.1<br>(72.15 to 32.40)  | 7.3<br>(2.9 to 4.3)      | 2.8<br>(1.3 to 2.6)       | 50.1<br>(6.4 to 9.7)       | 7.3<br>(1.3 to 2.6)     | 7.3<br>(2.4 to 4.9)       | 50.1<br>(47.12 to 41.75)   |
| Other skin and subcutaneous diseases  | 1.1<br>(0.9 to 1.6)        | 1.0<br>(0.7 to 1.6)        | 12.6<br>(49.48 to 47.80)   | 1.9<br>(13.9 to 2.7)       | 1.3<br>(0.9 to 2.0)       | 12.6<br>(50.76 to 6.75)    | 0.4<br>(0.3 to 0.4)       | 0.4<br>(0.2 to 0.6)       | 12.6<br>(49.02 to 71.88)   | 1.6<br>(1.0 to 2.0)       | 1.1<br>(0.7 to 1.8)       | 12.6<br>(42.72 to 26.36)  | 1.1<br>(0.9 to 1.1)      | 1.1<br>(0.6 to 1.1)       | 12.6<br>(46.54 to 47.71)   | 1.1<br>(1.2 to 4.0)     | 1.1<br>(1.0 to 2.5)       | 12.6<br>(58.93 to 10.54)   |
| Sudden infant death syndrome          | 63.4<br>(33.0 to 78.9)     | 63.4<br>(12.0 to 36.6)     | 0.4<br>(83.19 to 23.74)    | 25.7<br>(33.4 to 101.5)    | 20.5<br>(18.0 to 46.6)    | 19.7<br>(93.4 to 27.57)    | 5.5<br>(9.4 to 20.9)      | 5.6<br>(8.0 to 11.1)      | 9.0<br>(31.0 to 27.57)     | 20.6<br>(99.4 to 257.9)   | 16.4<br>(38.6 to 111.1)   | 19.7<br>(43.95 to 47.73)  | 9.3<br>(4.5 to 18.9)     | 9.2<br>(2.9 to 10.7)      | 0.7<br>(43.95 to 47.73)    | 9.8<br>(64.1 to 204.2)  | 34.5<br>(25.1 to 107.3)   | 14.9<br>(48.28 to 10.63)   |
| Injuries                              | 644.4<br>(585.8 to 639.6)  | 394.4<br>(366.1 to 424.1)  | 176.5<br>(40.77 to 31.06)  | 193.1<br>(120.4 to 131.02) | 193.1<br>(647.4 to 751.6) | 193.1<br>(49.04 to 40.56)  | 193.1<br>(418.4 to 464.3) | 193.1<br>(25.3 to 31.18)  | 193.1<br>(17.73 to 1954.4) | 193.1<br>(93.3 to 312.8)  | 193.1<br>(50.01 to 30.08) | 193.1<br>(17.7 to 31.2)   | 193.1<br>(100.1 to 35.6) | 193.1<br>(60.2 to 69.7)   | 193.1<br>(40.91 to 26.53)  | 193.1<br>(60.2 to 69.7) | 193.1<br>(24.1 to 89.77)  | 193.1<br>(48.73 to 39.28)  |
| Transport injuries                    | 217.5<br>(207.2 to 226.9)  | 101.6<br>(92.7 to 110.5)   | 53.3<br>(56.75 to 49.41)   | 47.8<br>(451.2 to 494.1)   | 219.6<br>(183.8 to 219.6) | 53.3<br>(60.55 to 53.50)   | 47.8<br>(163.5 to 176.0)  | 53.3<br>(71.7 to 86.5)    | 47.8<br>(70.0 to 766.7)    | 53.3<br>(28.8 to 343.5)   | 47.8<br>(61.34 to 51.15)  | 47.8<br>(38.5 to 53.8)    | 47.8<br>(18.9 to 27.8)   | 47.8<br>(56.92 to 46.22)  | 47.8<br>(16.2 to 23.6)     | 47.8<br>(7.3 to 10.8)   | 47.8<br>(46.92 to 51.47)  |                            |
| Road injuries                         | 210.7<br>(200.5 to 220.0)  | 101.6<br>(88.2 to 105.4)   | 53.3<br>(436.9 to 478.4)   | 47.8<br>(436.9 to 478.4)   | 219.6<br>(175.2 to 209.5) | 53.3<br>(61.21 to 54.20)   | 47.8<br>(157.7 to 176.8)  | 53.3<br>(68.4 to 82.4)    | 47.8<br>(68.5 to 744.0)    | 53.3<br>(27.1 to 327.6)   | 47.8<br>(61.94 to 46.93)  | 47.8<br>(37.6 to 52.5)    | 47.8<br>(18.2 to 27.0)   | 47.8<br>(57.60 to 46.93)  | 47.8<br>(16.2 to 22.7)     | 47.8<br>(10.2 to 104.9) | 47.8<br>(46.52 to 51.5)   |                            |
| Pedestrian road injuries              | 50.9<br>(37.8 to 65.8)     | 39.2<br>(15.2 to 39.2)     | 59.1<br>(43.72 to 68.07)   | 110.9<br>(82.0 to 121.9)   | 110.9<br>(29.4 to 108.5)  | 59.1<br>(62.81 to 42.54)   | 110.9<br>(18.9 to 25.5)   | 110.9<br>(43.72 to 68.07) | 110.9<br>(10.8 to 27.7)    | 110.9<br>(43.72 to 68.07) | 110.9<br>(68.2 to 47.13)  | 110.9<br>(11.1 to 14.3)   | 110.9<br>(3.8 to 5.5)    | 110.9<br>(46.41 to 54.27) | 110.9<br>(10.1 to 15.5)    | 110.9<br>(42.8 to 51.5) | 110.9<br>(13.9 to 22.7)   | 110.9<br>(78.88 to 62.40)  |
| Cyclist road injuries                 | 13.0<br>(9.8 to 16.6)      | 5.5<br>(3.9 to 6.7)        | 63.2<br>(65.12 to 50.92)   | 30.7<br>(23.0 to 39.1)     | 30.7<br>(10.9 to 13.2)    | 63.2<br>(69.81 to 57.25)   | 30.7<br>(3.9 to 33.8)     | 30.7<br>(2.6 to 5.2)      | 63.2<br>(68.22 to 51.11)   | 30.7<br>(34.5 to 64.7)    | 30.7<br>(10.9 to 22.6)    | 63.2<br>(59.15 to 57.48)  | 30.7<br>(1.8 to 3.4)     | 30.7<br>(0.8 to 1.7)      | 63.2<br>(59.15 to 40.04)   | 30.7<br>(8.4 to 15.2)   | 30.7<br>(3.4 to 6.9)      | 63.2<br>(46.92 to 46.40)   |
| Motorcyclist road injuries            | 41.7<br>(29.9 to 53.6)     | 9.0<br>(12.9 to 23.8)      | 49.0<br>(43.59 to 47.70)   | 49.0<br>(64.1 to 116.4)    | 49.0<br>(26.4 to 49.1)    | 49.0<br>(65.70 to 50.67)   | 49.0<br>(27.0 to 56.0)    | 49.0<br>(1.9 to 3.7)      | 49.0<br>(115.3 to 216.6)   | 49.0<br>(68.1 to 91.6)    | 49.0<br>(6.78 to 29.9)    | 49.0<br>(1.3 to 5.6)      | 49.0<br>(0.5 to 2.1)     | 49.0<br>(49.13 to 55.06)  | 49.0<br>(5.6 to 24.4)      | 49.0<br>(2.1 to 8.6)    | 49.0<br>(21.8 to 47.8)    |                            |
| Motor vehicle road injuries           | 103.6<br>(85.6 to 119.1)   | 51.3<br>(42.2 to 119.1)    | 50.4<br>(54.82 to 42.27)   | 223.3<br>(181.3 to 232.5)  | 223.3<br>(84.8 to 101.5)  | 223.3<br>(64.26 to 42.27)  | 223.3<br>(20.2 to 60.7)   | 223.3<br>(57.2 to 48.6)   | 223.3<br>(26.2 to 28.3)    | 223.3<br>(113.1 to 18.1)  | 223.3<br>(57.2 to 47.93)  | 223.3<br>(10.4 to 16.6)   | 223.3<br>(8.0 to 10.6)   | 223.3<br>(40.91 to 40.53) | 223.3<br>(8.0 to 10.6)     | 223.3<br>(41.4 to 66.0) | 223.3<br>(57.44 to 57.53) |                            |
| Other road injuries                   | 0.5<br>(1.9 to 0.5)        | 0.6<br>(0.4 to 0.9)        | 60.7<br>(49.82 to 35.48)   | 3.2<br>(1.8 to 4.1)        | 1.7<br>(0.8 to 1.7)       | 60.7<br>(73.10 to 43.64)   | 3.2<br>(0.4 to 1.0)       | 1.7<br>(0.2 to 0.5)       | 60.7<br>(80.49 to 49.35)   | 3.2<br>(1.6 to 5.6)       | 1.7<br>(0.6 to 1.8)       | 60.7<br>(42.39 to 56.52)  | 3.2<br>(0.3 to 0.8)      | 1.7<br>(0.2 to 0.5)       | 60.7<br>(5.18 to 18.8)     | 3.2<br>(1.4 to 3.3)     | 3.2<br>(0.7 to 1.8)       | 60.7<br>(46.71 to 23.98)   |
| Other transport injuries              | 6.3<br>(5.5 to 8.2)        | 14.0<br>(14.0 to 15.2)     | 9.2<br>(40.88 to 18.87)    | 30.7<br>(28.7 to 20.03)    | 30.7<br>(89.1 to 151.6)   | 9.2<br>(35.32 to 20.03)    | 30.7<br>(21.2 to 109.5)   | 30.7<br>(72.0 to 109.5)   | 9.2<br>(25.80 to 172.4)    | 30.7<br>(21.2 to 109.5)   | 9.2<br>(38.08 to 114.4)   | 30.7<br>(52.4 to 242.9)   | 9.2<br>(46.7 to 104.4)   | 9.2<br>(1.2 to 10.21)     | 9.2<br>(17.7 to 122.1)     | 9.2<br>(17.7 to 122.1)  | 9.2<br>(12.9 to 68.2)     | 9.2<br>(34.6 to 13.80)     |
| Unintentional injuries                | 155.5<br>(146.9 to 166.3)  | 141.0<br>(48.1 to 76.2)    | 9.2<br>(16.79 to 59.18)    | 30.7<br>(83.6 to 86.0)     | 30.7<br>(61.5 to 96.4)    | 9.2<br>(35.79 to 22.03)    | 30.7<br>(77.5 to 36.2)    | 30.7<br>(25.3 to 43.7)    | 9.2<br>(18.82 to 144.2)    | 30.7<br>(110.6 to 144.2)  | 9.2<br>(76.5 to 130.6)    | 30.7<br>(37.91 to 21.16)  | 30.7<br>(20.4 to 31.2)   | 30.7<br>(50.7 to 59.20)   | 30.7<br>(10.7 to 16.6)     | 30.7<br>(30.7 to 25.63) | 30.7<br>(50.7 to 25.63)   | 30.7<br>(46.79 to 38.77)   |
| Falls                                 | 50.8<br>(46.9 to 66.3)     | 66.1<br>(48.1 to 76.2)     | 11.8<br>(16.79 to 59.18)   | 32.8<br>(83.6 to 86.0)     | 32.8<br>(61.5 to 96.4)    | 11.8<br>(35.79 to 22.03)   | 32.8<br>(77.5 to 36.2)    | 11.8<br>(25.3 to 43.7)    | 11.8<br>(18.82 to 144.2)   | 32.8<br>(110.6 to 144.2)  | 11.8<br>(76.5 to 130.6)   | 32.8<br>(37.91 to 21.16)  | 32.8<br>(20.4 to 31.2)   | 32.8<br>(50.7 to 59.20)   | 32.8<br>(10.7 to 16.6)     | 32.8<br>(30.7 to 25.63) | 32.8<br>(50.7 to 25.63)   | 32.8<br>(46.79 to 38.77)   |
| Drowning                              | 16.3<br>(13.3 to 19.0)     | 9.3<br>(7.3 to 11.6)       | 41.6<br>(51.39 to 32.76)   | 41.6<br>(31.1 to 44.0)     | 41.6<br>(15.5 to 24.2)    | 41.6<br>(56.42 to 39.81)   | 41.6<br>(100.0 to 15.2)   | 41.6<br>(5.6 to 9.3)      | 41.6<br>(51.59 to 31.88)   | 41.6<br>(46.5 to 70.4)    | 41.6<br>(23.3 to 38.8)    | 41.6<br>(56.40 to 39.07)  | 41.6<br>(2.9 to 4.2)     | 41.6<br>(1.4 to 2.5)      | 41.6<br>(56.34 to 32.82)   | 41.6<br>(13.5 to 19.0)  | 41.6<br>(5.9 to 10.5)     | 41.6<br>(41.70 to 39.44)   |
| Fire, heat, and hot substances        | 9.3<br>(15.4 to 21.8)      | 41.6<br>(7.8 to 12.8)      | 51.7<br>(59.88 to 21.72)   | 41.6<br>(32.8 to 47.1)     | 41.6<br>(14.1 to 23.1)    | 51.7<br>(66.22 to 32.52)   | 41.6<br>(8.0 to 13.2)     | 41.6<br>(4.4 to 7.9)      | 51.7<br>(60.22 to 15.2     |                           |                           |                           |                          |                           |                            |                         |                           |                            |



Web Table 6 - YLDs in England in 1990 and 2013 for all ages and age-standardized rates (per 100,000) by sex with 95% UI and percentage change. Percent changes in bold denote a statistically significant change.

| Cause                                                                     | Both sexes combined |         |          |      |                                     |          |         |         |                     |         |       |          | Males                               |         |          |         |                     |          | Females  |         |                                     |         |         |          |
|---------------------------------------------------------------------------|---------------------|---------|----------|------|-------------------------------------|----------|---------|---------|---------------------|---------|-------|----------|-------------------------------------|---------|----------|---------|---------------------|----------|----------|---------|-------------------------------------|---------|---------|----------|
|                                                                           | YLDs (in thousands) |         |          |      | Age-standardized rate (per 100,000) |          |         |         | YLDs (in thousands) |         |       |          | Age-standardized rate (per 100,000) |         |          |         | YLDs (in thousands) |          |          |         | Age-standardized rate (per 100,000) |         |         |          |
|                                                                           | 1990                | 2013    | % change | 1990 | 2013                                | % change | 1990    | 2013    | % change            | 1990    | 2013  | % change | 1990                                | 2013    | % change | 1990    | 2013                | % change | 1990     | 2013    | % change                            | 1990    | 2013    | % change |
| <b>All causes</b>                                                         | 6,154.3             | 5,395.0 | -12.3    | 16.0 | 11.865                              | -23.5    | 11,865  | 7,762.5 | -34.5               | 3,920.0 | 19.5  | -49.5    | 11,066.7                            | 3,920.0 | -64.9    | 5,918.0 | 3,920.0             | -33.1    | 11,066.7 | 3,920.0 | -64.9                               | 5,918.0 | 3,920.0 | -33.1    |
| <b>Communicable, maternal, neonatal, and nutritional diseases</b>         | 247.4               | 284.2   | 14.5     | 15.0 | 587.0                               | 29.3     | 1,386.0 | 4.9     | 123.6               | 143.6   | 16.3  | 60.4     | 632.7                               | 123.6   | 103.2    | 5.5     | 123.6               | 143.6    | 16.3     | 60.4    | 632.7                               | 123.6   | 103.2   | 5.5      |
| <b>HIV/AIDS and tuberculosis</b>                                          | 4.0                 | 4.0     | 0.0      | 0.0  | 0.0                                 | 0.0      | 0.0     | 0.0     | 0.0                 | 0.0     | 0.0   | 0.0      | 0.0                                 | 0.0     | 0.0      | 0.0     | 0.0                 | 0.0      | 0.0      | 0.0     | 0.0                                 | 0.0     | 0.0     | 0.0      |
| <b>Tuberculosis</b>                                                       | 2.6                 | 3.4     | 29.6     | 5.6  | 6.2                                 | 10.7     | 1.5     | 2.0     | 2.0                 | 0.0     | 0.0   | 0.0      | 6.1                                 | 7.1     | 16.4     | 1.4     | 1.4                 | 0.0      | 6.1      | 7.1     | 16.4                                | 1.4     | 1.4     | 0.0      |
| <b>HIV/AIDS</b>                                                           | 1.4                 | 1.7     | 21.4     | 2.4  | 2.4                                 | 0.0      | 1.2     | 1.2     | 0.0                 | 0.0     | 0.0   | 0.0      | 1.8                                 | 1.8     | 0.0      | 0.0     | 0.0                 | 0.0      | 1.8      | 1.8     | 0.0                                 | 0.0     | 0.0     | 0.0      |
| <b>HIV/AIDS resulting in mycobacterial infection</b>                      | 0.3                 | 0.1     | -66.7    | 0.1  | 0.1                                 | 0.0      | 0.1     | 0.1     | 0.0                 | 0.0     | 0.0   | 0.0      | 0.2                                 | 0.2     | 0.0      | 0.0     | 0.0                 | 0.0      | 0.2      | 0.2     | 0.0                                 | 0.0     | 0.0     | 0.0      |
| <b>HIV/AIDS resulting in other diseases</b>                               | 1.1                 | 1.6     | 45.5     | 2.3  | 2.3                                 | 0.0      | 0.9     | 0.9     | 0.0                 | 0.0     | 0.0   | 0.0      | 3.7                                 | 3.7     | 0.0      | 0.0     | 0.0                 | 0.0      | 3.7      | 3.7     | 0.0                                 | 0.0     | 0.0     | 0.0      |
| <b>Diarrhoea, lower respiratory, and other common infectious diseases</b> | 28.2                | 29.3    | 3.9      | 3.8  | 60.1                                | 55.3     | 4.0     | 14.2    | 14.8                | 4.0     | 3.7   | 62.4     | 14.8                                | 14.8    | 0.0      | 14.0    | 14.0                | 0.0      | 14.8     | 14.8    | 0.0                                 | 14.0    | 14.0    | 0.0      |
| <b>Diarrhoeal diseases</b>                                                | 1.8                 | 3.3     | 83.3     | 5.1  | 5.1                                 | 0.0      | 2.5     | 2.5     | 0.0                 | 0.0     | 0.0   | 1.6      | 1.6                                 | 0.0     | 1.0      | 1.0     | 0.0                 | 0.0      | 1.6      | 1.6     | 0.0                                 | 1.0     | 1.0     | 0.0      |
| <b>Intestinal infectious diseases</b>                                     | 0.1                 | 0.1     | 0.0      | 0.1  | 0.1                                 | 0.0      | 0.1     | 0.1     | 0.0                 | 0.0     | 0.0   | 0.1      | 0.1                                 | 0.0     | 0.1      | 0.1     | 0.0                 | 0.0      | 0.1      | 0.1     | 0.0                                 | 0.1     | 0.1     | 0.0      |
| <b>Typhoid fever</b>                                                      | 0.0                 | 0.0     | 0.0      | 0.0  | 0.0                                 | 0.0      | 0.0     | 0.0     | 0.0                 | 0.0     | 0.0   | 0.0      | 0.0                                 | 0.0     | 0.0      | 0.0     | 0.0                 | 0.0      | 0.0      | 0.0     | 0.0                                 | 0.0     | 0.0     | 0.0      |
| <b>Paratyphoid fever</b>                                                  | 0.0                 | 0.0     | 0.0      | 0.0  | 0.0                                 | 0.0      | 0.0     | 0.0     | 0.0                 | 0.0     | 0.0   | 0.0      | 0.0                                 | 0.0     | 0.0      | 0.0     | 0.0                 | 0.0      | 0.0      | 0.0     | 0.0                                 | 0.0     | 0.0     | 0.0      |
| <b>Other intestinal infectious diseases</b>                               | 0.0                 | 0.0     | 0.0      | 0.0  | 0.0                                 | 0.0      | 0.0     | 0.0     | 0.0                 | 0.0     | 0.0   | 0.0      | 0.0                                 | 0.0     | 0.0      | 0.0     | 0.0                 | 0.0      | 0.0      | 0.0     | 0.0                                 | 0.0     | 0.0     | 0.0      |
| <b>Lower respiratory infections</b>                                       | 0.9                 | 2.0     | 122.2    | 1.4  | 1.4                                 | 0.0      | 1.4     | 1.4     | 0.0                 | 0.0     | 0.0   | 1.6      | 1.6                                 | 0.0     | 1.4      | 1.4     | 0.0                 | 0.0      | 1.6      | 1.6     | 0.0                                 | 1.4     | 1.4     | 0.0      |
| <b>Upper respiratory infections</b>                                       | 8.4                 | 9.3     | 10.9     | 18.4 | 18.4                                | 0.0      | 4.0     | 4.0     | 0.0                 | 0.0     | 0.0   | 4.6      | 4.6                                 | 0.0     | 17.9     | 17.9    | 0.0                 | 0.0      | 4.6      | 4.6     | 0.0                                 | 17.9    | 17.9    | 0.0      |
| <b>Otitis media</b>                                                       | 11.0                | 23.8    | 216.4    | 2.8  | 2.8                                 | 0.0      | 2.8     | 2.8     | 0.0                 | 0.0     | 0.0   | 2.1      | 2.1                                 | 0.0     | 2.1      | 2.1     | 0.0                 | 0.0      | 2.1      | 2.1     | 0.0                                 | 2.1     | 2.1     | 0.0      |
| <b>Meningitis</b>                                                         | 2.3                 | 2.3     | 0.0      | 2.3  | 2.3                                 | 0.0      | 2.3     | 2.3     | 0.0                 | 0.0     | 0.0   | 2.3      | 2.3                                 | 0.0     | 2.3      | 2.3     | 0.0                 | 0.0      | 2.3      | 2.3     | 0.0                                 | 2.3     | 2.3     | 0.0      |
| <b>Pneumococcal meningitis</b>                                            | 0.7                 | 0.7     | 0.0      | 1.4  | 1.4                                 | 100.0    | 1.3     | 1.3     | 0.0                 | 0.3     | 0.3   | 0.0      | 1.4                                 | 1.4     | 0.0      | 1.3     | 1.3                 | 0.0      | 1.4      | 1.4     | 0.0                                 | 1.3     | 1.3     | 0.0      |
| <b>H influenzae type B meningitis</b>                                     | 0.5                 | 0.6     | 14.3     | 1.2  | 1.2                                 | 0.0      | 1.2     | 1.2     | 0.0                 | 0.3     | 0.3   | 0.0      | 1.2                                 | 1.2     | 0.0      | 1.2     | 1.2                 | 0.0      | 1.2      | 1.2     | 0.0                                 | 1.2     | 1.2     | 0.0      |
| <b>Meningococcal meningitis</b>                                           | 0.3                 | 0.3     | 0.0      | 0.3  | 0.3                                 | 0.0      | 0.3     | 0.3     | 0.0                 | 0.3     | 0.3   | 0.0      | 0.3                                 | 0.3     | 0.0      | 0.3     | 0.3                 | 0.0      | 0.3      | 0.3     | 0.0                                 | 0.3     | 0.3     | 0.0      |
| <b>Other meningitis</b>                                                   | 0.8                 | 0.8     | 0.0      | 1.7  | 1.7                                 | 112.5    | 1.6     | 1.6     | 0.0                 | 0.7     | 0.7   | 0.0      | 1.8                                 | 1.8     | 15.7     | 1.6     | 1.6                 | 0.0      | 1.7      | 1.7     | 112.5                               | 1.6     | 1.6     | 0.0      |
| <b>Encephalitis</b>                                                       | 0.1                 | 0.4     | 300.0    | 0.2  | 0.2                                 | 100.0    | 0.2     | 0.2     | 0.0                 | 0.2     | 0.2   | 0.0      | 0.2                                 | 0.2     | 0.0      | 0.2     | 0.2                 | 0.0      | 0.2      | 0.2     | 0.0                                 | 0.2     | 0.2     | 0.0      |
| <b>Diphtheria</b>                                                         | 0.0                 | 0.0     | 0.0      | 0.0  | 0.0                                 | 0.0      | 0.0     | 0.0     | 0.0                 | 0.0     | 0.0   | 0.0      | 0.0                                 | 0.0     | 0.0      | 0.0     | 0.0                 | 0.0      | 0.0      | 0.0     | 0.0                                 | 0.0     | 0.0     | 0.0      |
| <b>Whooping cough</b>                                                     | 0.2                 | 0.2     | 0.0      | 0.6  | 0.6                                 | 200.0    | 1.0     | 1.0     | 0.0                 | 0.2     | 0.2   | 0.0      | 0.2                                 | 0.2     | 0.0      | 0.2     | 0.2                 | 0.0      | 0.2      | 0.2     | 0.0                                 | 0.2     | 0.2     | 0.0      |
| <b>Tetanus</b>                                                            | 0.0                 | 0.0     | 0.0      | 0.0  | 0.0                                 | 0.0      | 0.0     | 0.0     | 0.0                 | 0.0     | 0.0   | 0.0      | 0.0                                 | 0.0     | 0.0      | 0.0     | 0.0                 | 0.0      | 0.0      | 0.0     | 0.0                                 | 0.0     | 0.0     | 0.0      |
| <b>Measles</b>                                                            | 0.1                 | 0.1     | 0.0      | 99.0 | 99.0                                | 99,000.0 | 0.0     | 0.0     | 0.0                 | 0.0     | 0.0   | 0.0      | 0.0                                 | 0.0     | 0.0      | 0.0     | 0.0                 | 0.0      | 0.0      | 0.0     | 0.0                                 | 0.0     | 0.0     | 0.0      |
| <b>Varicella and herpes zoster</b>                                        | 1.6                 | 1.9     | 18.8     | 3.0  | 3.0                                 | 0.0      | 2.4     | 2.4     | 0.0                 | 0.0     | 0.0   | 0.0      | 0.0                                 | 0.0     | 0.0      | 0.0     | 0.0                 | 0.0      | 0.0      | 0.0     | 0.0                                 | 0.0     | 0.0     | 0.0      |
| <b>Neglected tropical diseases and malaria</b>                            | 0.4                 | 0.4     | 0.0      | 0.4  | 0.4                                 | 0.0      | 0.4     | 0.4     | 0.0                 | 0.4     | 0.4   | 0.0      | 0.4                                 | 0.4     | 0.0      | 0.4     | 0.4                 | 0.0      | 0.4      | 0.4     | 0.0                                 | 0.4     | 0.4     | 0.0      |
| <b>Malaria</b>                                                            | 0.3                 | 0.6     | 100.0    | 0.0  | 0.0                                 | 0.0      | 0.0     | 0.0     | 0.0                 | 0.0     | 0.0   | 0.0      | 0.0                                 | 0.0     | 0.0      | 0.0     | 0.0                 | 0.0      | 0.0      | 0.0     | 0.0                                 | 0.0     | 0.0     | 0.0      |
| <b>Cysticercosis</b>                                                      | 0.1                 | 0.1     | 0.0      | 0.0  | 0.0                                 | 0.0      | 0.0     | 0.0     | 0.0                 | 0.0     | 0.0   | 0.0      | 0.0                                 | 0.0     | 0.0      | 0.0     | 0.0                 | 0.0      | 0.0      | 0.0     | 0.0                                 | 0.0     | 0.0     | 0.0      |
| <b>Cystic echinococcosis</b>                                              | 0.2                 | 0.2     | 0.0      | 0.2  | 0.2                                 | 0.0      | 0.2     | 0.2     | 0.0                 | 0.2     | 0.2   | 0.0      | 0.2                                 | 0.2     | 0.0      | 0.2     | 0.2                 | 0.0      | 0.2      | 0.2     | 0.0                                 | 0.2     | 0.2     | 0.0      |
| <b>Rabies</b>                                                             | 0.0                 | 0.0     | 0.0      | 0.0  | 0.0                                 | 0.0      | 0.0     | 0.0     | 0.0                 | 0.0     | 0.0   | 0.0      | 0.0                                 | 0.0     | 0.0      | 0.0     | 0.0                 | 0.0      | 0.0      | 0.0     | 0.0                                 | 0.0     | 0.0     | 0.0      |
| <b>Other neglected tropical diseases</b>                                  | 0.0                 | 0.0     | 0.0      | 0.0  | 0.0                                 | 0.0      | 0.0     | 0.0     | 0.0                 | 0.0     | 0.0   | 0.0      | 0.0                                 | 0.0     | 0.0      | 0.0     | 0.0                 | 0.0      | 0.0      | 0.0     | 0.0                                 | 0.0     | 0.0     | 0.0      |
| <b>Maternal disorders</b>                                                 | 2.3                 | 2.3     | 0.0      | 2.3  | 2.3                                 | 0.0      | 2.3     | 2.3     | 0.0                 | 2.3     | 2.3   | 0.0      | 2.3                                 | 2.3     | 0.0      | 2.3     | 2.3                 | 0.0      | 2.3      | 2.3     | 0.0                                 | 2.3     | 2.3     | 0.0      |
| <b>Maternal hemorrhage</b>                                                | 1.3                 | 1.3     | 0.0      | 1.3  | 1.3                                 | 0.0      | 1.3     | 1.3     | 0.0                 | 1.3     | 1.3   | 0.0      | 1.3                                 | 1.3     | 0.0      | 1.3     | 1.3                 | 0.0      | 1.3      | 1.3     | 0.0                                 | 1.3     | 1.3     | 0.0      |
| <b>Maternal sepsis and other maternal infections</b>                      | 0.0                 | 0.0     | 0.0      | 0.0  | 0.0                                 | 0.0      | 0.0     | 0.0     | 0.0                 | 0.0     | 0.0   | 0.0      | 0.0                                 | 0.0     | 0.0      | 0.0     | 0.0                 | 0.0      | 0.0      | 0.0     | 0.0                                 | 0.0     | 0.0     | 0.0      |
| <b>Maternal hypertensive disorders</b>                                    | 0.9                 | 0.9     | 0.0      | 0.9  | 0.9                                 | 0.0      | 0.9     | 0.9     | 0.0                 | 0.9     | 0.9   | 0.0      | 0.9                                 | 0.9     | 0.0      | 0.9     | 0.9                 | 0.0      | 0.9      | 0.9     | 0.0                                 | 0.9     | 0.9     | 0.0      |
| <b>Obstructed labour</b>                                                  | 0.1                 | 0.1     | 0.0      | 0.1  | 0.1                                 | 0.0      | 0.1     | 0.1     | 0.0                 | 0.1     | 0.1   | 0.0      | 0.1                                 | 0.1     | 0.0      | 0.1     | 0.1                 | 0.0      | 0.1      | 0.1     | 0.0                                 | 0.1     | 0.1     | 0.0      |
| <b>Complications of abortion</b>                                          | 0.0                 | 0.0     | 0.0      | 0.0  | 0.0                                 | 0.0      | 0.0     | 0.0     | 0.0                 | 0.0     | 0.0   | 0.0      | 0.0                                 | 0.0     | 0.0      | 0.0     | 0.0                 | 0.0      | 0.0      | 0.0     | 0.0                                 | 0.0     | 0.0     | 0.0      |
| <b>Other maternal disorders</b>                                           | 0.9                 | 0.9     | 0.0      | 0.9  | 0.9                                 | 0.0      | 0.9     | 0.9     | 0.0                 | 0.9     | 0.9   | 0.0      | 0.9                                 | 0.9     | 0.0      | 0.9     | 0.9                 | 0.0      | 0.9      | 0.9     | 0.0                                 | 0.9     | 0.9     | 0.0      |
| <b>Neonatal disorders</b>                                                 | 52.7                | 117.7   | 223.3    | 46.1 | 154.5                               | 231.2    | 38.8    | 40.9    | 5.1                 | 125.1   | 156.1 | 26.2     | 37.9                                | 100.0   | 26.2     | 100.0   | 0.0                 | 37.9     | 100.0    | 26.2    | 100.0                               | 26.2    | 100.0   | 0.0      |
| <b>Premature birth complications</b>                                      | 34.7                | 58.9    | 71.5     | 70.5 | 77.1                                | 10.9     | 18.0    | 29.5    | 63.3                | 117.9   | 49.3  | 16.7     | 29.5                                | 58.9    | 100.0    | 29.5    | 100.0               | 0.0      | 29.5     | 58.9    | 100.0                               | 29.5    | 58.9    | 100.0    |
| <b>Neonatal encephalopathy due to birth asphyxia and trauma</b>           | 10.5                | 8.8     | -16.2    | 24.0 | 18.1                                | -24.6    | 4.6     | 4.6     | -10.0               | 25.2    | 19.0  | -24.0    | 4.6                                 | 4.6     | 0.0      | 4.6     | 4.6                 | 0.0      | 4.6      | 4.6     | 0.0                                 | 4.6     | 4.6     | 0.0      |
| <b>Neonatal sepsis and other neonatal infections</b>                      | 0.0                 | 0.0     | 0.0      | 0.0  | 0.0                                 | 0.0      | 0.0     | 0.0     | 0.0                 | 0.0     | 0.0   | 0.0      | 0.0                                 | 0.0     | 0.0      | 0.0     | 0.0                 | 0.0      | 0.0      | 0.0     | 0.0                                 | 0.0     | 0.0     | 0.0      |
| <b>Hemolytic disease and other neonatal jaundice</b>                      | 2.9                 | 2.9     | 0.0      | 2.9  | 2.9                                 | 0.0      | 2.9     | 2.9     | 0.0                 | 2.9     | 2.9   | 0.0      | 2.9                                 | 2.9     | 0.0      | 2.9     | 2.9                 | 0.0      | 2.9      | 2.9     | 0.0                                 | 2.9     | 2.9     | 0.0      |
| <b>Other neonatal disorders</b>                                           | 2.6                 | 4.9     | 88.5     | 5.7  | 9.9                                 | 72.9     | 7.1     | 2.6     | 6.4                 | 10.6    | 5.0   | 7.3      | 1.1                                 | 1.1     | 0.0      | 1.1     | 1.1                 | 0.0      | 1.1      | 1.1     | 0.0                                 | 1.1     | 1.1     | 0.0      |
| <b>Nutritional deficiencies</b>                                           | 145.3               | 154.7   | 10.3     | 35.9 | 36.4                                | 1.4      | 35.9    | 36.4    | 1.4                 | 37.0    | 37.0  | 0.0      | 37.0                                | 37.0    | 0.0      | 37.0    | 37.0                | 0.0      | 37.0     | 37.0    | 0.0                                 | 37.0    | 37.0    | 0.0      |
| <b>Protein-energy malnutrition</b>                                        | 16.0                | 10.9    | -31.9    | 32.1 | 32.1                                | 0.0      | 32.1    | 32.1    | 0.0                 | 32.1    | 32.1  | 0.0      | 32.1                                | 32.1    | 0.0      | 32.1    | 32.1                | 0.0      | 32.1     | 32.1    | 0.0                                 | 32.1    | 32.1    | 0.0      |
| <b>Iodine deficiency</b>                                                  | 9.3                 | 12.1    | 29.1     | 12.1 | 12.1                                | 0.0      | 12.1    | 12.1    | 0.0                 | 12.1    | 12.1  | 0.0      | 12.1                                | 12.1    | 0        |         |                     |          |          |         |                                     |         |         |          |

|                                      |                                 |                                 |                             |                                  |                                  |                              |                                 |                                 |                                 |                                  |                                  |                            |                               |                               |                             |                                  |                                |                            |
|--------------------------------------|---------------------------------|---------------------------------|-----------------------------|----------------------------------|----------------------------------|------------------------------|---------------------------------|---------------------------------|---------------------------------|----------------------------------|----------------------------------|----------------------------|-------------------------------|-------------------------------|-----------------------------|----------------------------------|--------------------------------|----------------------------|
| Other sexually transmitted diseases  | 0.2<br>(0.1 to 0.3)             | 0.2<br>(0.1 to 0.3)             | 0.7<br>(0.3 to 1.1)         | 0.4<br>(0.2 to 0.6)              | 0.4<br>(0.2 to 0.6)              | 2.2<br>(0.9 to 4.4)          | --                              | --                              | --                              | --                               | --                               | --                         | 0.2<br>(0.1 to 0.3)           | 0.2<br>(0.1 to 0.3)           | 8.7<br>(3.7 to 14.8)        | 0.6<br>(0.4 to 0.7)              | 0.9<br>(0.6 to 1.2)            | 2.2<br>(0.9 to 3.5)        |
| Hepatitis                            | 1.5<br>(1.0 to 2.2)             | 1.5<br>(0.9 to 2.1)             | 4.2<br>(9.2 to 4.7)         | 3.2<br>(2.1 to 4.7)              | 2.7<br>(1.8 to 4.0)              | 14.3<br>(18.5 to 10.3)       | 0.8<br>(0.5 to 1.2)             | 0.8<br>(0.5 to 1.1)             | 5.7<br>(12.4 to 0.9)            | 3.4<br>(2.2 to 5.0)              | 2.9<br>(1.9 to 4.2)              | 16.4<br>(22.1 to 30.6)     | 0.5<br>(0.5 to 1.1)           | 0.5<br>(0.5 to 1.0)           | 2.5<br>(7.9 to 2.6)         | 0.6<br>(1.9 to 4.3)              | 0.9<br>(1.7 to 3.8)            | 2.2<br>(17.0 to 6.4)       |
| Hepatitis A                          | 1.4<br>(0.7 to 1.5)             | 1.4<br>(0.7 to 1.6)             | 2.1<br>(1.19 to 7.53)       | 2.1<br>(1.4 to 3.3)              | 2.1<br>(1.3 to 3.0)              | 4.9<br>(10.9 to 2.79)        | 0.8<br>(0.3 to 0.8)             | 0.8<br>(0.3 to 0.8)             | 2.1<br>(2.1 to 9.90)            | 1.7<br>(1.4 to 3.3)              | 1.7<br>(1.3 to 3.1)              | 2.1<br>(12.35 to 1.42)     | 0.5<br>(0.3 to 0.8)           | 0.5<br>(0.4 to 0.8)           | 0.5<br>(3.45 to 8.76)       | 0.5<br>(1.4 to 3.3)              | 0.5<br>(13.3 to 0.0)           | 2.1<br>(12.68 to 1.17)     |
| Hepatitis B                          | 0.4<br>(0.2 to 0.6)             | 0.3<br>(0.2 to 0.4)             | 38.2<br>(34.7 to 10.44)     | 0.7<br>(0.3 to 0.7)              | 0.5<br>(0.3 to 0.7)              | 22.5<br>(43.5 to 22.99)      | 0.2<br>(0.2 to 0.4)             | 0.2<br>(0.1 to 0.3)             | 0.2<br>(0.2 to 0.4)             | 0.6<br>(0.6 to 1.5)              | 0.6<br>(0.4 to 1.0)              | 34.9<br>(47.99 to 19.49)   | 0.1<br>(0.1 to 0.2)           | 0.1<br>(0.1 to 0.2)           | 0.1<br>(0.0 to 0.1)         | 0.1<br>(0.1 to 0.2)              | 0.1<br>(0.1 to 0.2)            | 0.1<br>(43.98 to 12.49)    |
| Hepatitis C                          | 0.1<br>(0.1 to 0.2)             | 0.1<br>(0.1 to 0.1)             | 0.2<br>(23.32 to 0.72)      | 0.2<br>(0.1 to 0.2)              | 0.2<br>(0.1 to 0.2)              | 26.7<br>(34.51 to 18.35)     | 0.2<br>(0.0 to 0.1)             | 0.2<br>(0.0 to 0.1)             | 26.7<br>(26.82 to 18.40)        | 0.2<br>(0.1 to 0.3)              | 0.2<br>(0.1 to 0.2)              | 0.2<br>(0.0 to 0.1)        | 0.2<br>(0.0 to 0.1)           | 0.2<br>(0.0 to 0.1)           | 0.2<br>(0.1 to 0.3)         | 0.2<br>(0.1 to 0.2)              | 0.2<br>(0.1 to 0.2)            | 0.2<br>(37.70 to 9.81)     |
| Leprosy                              | --                              | <0.05<br>(0.0 to <0.05)         | --                          | --                               | <0.05<br>(0.0 to <0.05)          | --                           | --                              | <0.05<br>(0.0 to <0.05)         | --                              | <0.05<br>(0.0 to <0.05)          | --                               | <0.05<br>(0.0 to <0.05)    | --                            | <0.05<br>(0.0 to <0.05)       | --                          | --                               | --                             | 0.05<br>(0.0 to 0.05)      |
| Other infectious diseases            | 5.5<br>(3.5 to 9.2)             | 14.7<br>(8.8 to 9.9)            | 14.7<br>(12.49 to 59.08)    | 4.4<br>(9.8 to 22.1)             | 7.9<br>(9.8 to 22.1)             | 16.0<br>(19.30 to 52.02)     | 5.9<br>(2.5 to 5.7)             | 4.4<br>(2.5 to 5.7)             | 13.0<br>(5.06 to 22.21)         | 20.5<br>(13.4 to 30.0)           | 5.3<br>(4.2 to 31.3)             | 1.6<br>(1.4 to 13.51)      | 1.6<br>(0.9 to 0.9)           | 1.6<br>(0.8 to 4.3)           | 2.9<br>(0.8 to 4.3)         | 22.9<br>(14.7 to 178.21)         | 1.0<br>(5.1 to 17.7)           | 18.4<br>(51.35 to 176.4)   |
| Non-communicable diseases            | 3,833.2<br>(3,864.1 to 6,861.6) | 4,641.9<br>(4,789.5 to 8,246.4) | 4,917.7<br>(7,702 to 21.33) | 9,852.4<br>(7,321.5 to 12,602.1) | 9,852.4<br>(7,427.3 to 12,286.6) | 19,704.8<br>(24,720 to 2.80) | 2,372.7<br>(1,759.6 to 3,017.8) | 2,372.7<br>(1,759.6 to 3,017.8) | 2,372.7<br>(2,174.9 to 3,245.1) | 9,404.7<br>(6,946.4 to 12,021.4) | 9,404.7<br>(6,985.8 to 12,100.7) | 2,099.1<br>(0.92 to 0.2)   | 2,099.1<br>(2,226 to 3,856.1) | 2,099.1<br>(2,044 to 4,478.9) | 2,099.1<br>(14.86 to 37.10) | 2,099.1<br>(7,099.8 to 13,990.8) | 2,099.1<br>(7,420.1 to 16,211) | 2,099.1<br>(4,066 to 3.7)  |
| Neoplasms                            | 92.8<br>(67 to 117.8)           | 126.7<br>(94 to 162.5)          | 36.6<br>(27.7 to 45.24)     | 143.2<br>(107.5 to 192.8)        | 152.8<br>(111.5 to 197.5)        | 6.7<br>(4.3 to 13.22)        | 43.9<br>(32.9 to 55.1)          | 43.9<br>(32.9 to 55.1)          | 43.9<br>(40.0 to 82.9)          | 368.3<br>(116.8 to 196.2)        | 368.3<br>(124.4 to 562.2)        | 7.8<br>(4.45 to 18.25)     | 48.8<br>(0.2 to 0.2)          | 48.8<br>(64.9 to 80.8)        | 192.2<br>(14.86 to 37.10)   | 192.2<br>(102 to 186.6)          | 192.2<br>(102 to 186.6)        | 2.2<br>(6.41 to 10.52)     |
| Esophageal cancer                    | 1.1<br>(0.9 to 1.7)             | 2.3<br>(1.3 to 2.5)             | 26.7<br>(10.12 to 71.34)    | 4.3<br>(1.4 to 2.6)              | 4.3<br>(1.5 to 2.9)              | 42.1<br>(13.73 to 32.43)     | 1.9<br>(0.5 to 1.0)             | 1.9<br>(0.8 to 1.7)             | 1.9<br>(0.8 to 1.7)             | 1.4<br>(1.8 to 3.6)              | 1.4<br>(2.0 to 4.5)              | 2.5<br>(15.00 to 50.34)    | 1.2<br>(0.4 to 0.8)           | 1.2<br>(0.4 to 0.8)           | 2.1<br>(18.38 to 51.05)     | 1.8<br>(1.0 to 1.9)              | 1.8<br>(0.8 to 1.8)            | 8.2<br>(41.92 to 21.88)    |
| Stomach cancer                       | 2.3<br>(2.3 to 4.0)             | 2.3<br>(1.7 to 3.1)             | 26.7<br>(34.91 to 33.49)    | 4.3<br>(3.3 to 5.9)              | 4.3<br>(1.4 to 2.5)              | 42.1<br>(49.31 to 33.49)     | 1.9<br>(1.0 to 1.8)             | 1.9<br>(1.0 to 1.8)             | 1.9<br>(1.0 to 1.8)             | 1.4<br>(4.9 to 8.7)              | 1.4<br>(2.5 to 4.0)              | 2.5<br>(56.11 to 38.44)    | 1.2<br>(0.8 to 1.7)           | 1.2<br>(0.8 to 1.7)           | 2.1<br>(36.92 to 2.53)      | 2.9<br>(1.9 to 4.1)              | 2.9<br>(1.2 to 2.6)            | 8.2<br>(48.53 to 17.41)    |
| Liver cancer                         | 0.4<br>(0.2 to 0.5)             | 0.8<br>(0.5 to 1.1)             | 121.2<br>(48.0 to 152.66)   | 0.5<br>(0.4 to 0.8)              | 0.9<br>(0.6 to 0.9)              | 72.3<br>(18.66 to 126.55)    | 0.2<br>(0.1 to 0.3)             | 0.2<br>(0.1 to 0.3)             | 0.2<br>(0.1 to 0.3)             | 123.4<br>(31.46 to 219.29)       | 1.2<br>(0.5 to 1.2)              | 64.0<br>(2.47 to 132.74)   | 0.1<br>(0.1 to 0.2)           | 0.1<br>(0.2 to 0.4)           | 121.1<br>(26.96 to 218.30)  | 0.3<br>(0.2 to 0.5)              | 0.6<br>(0.4 to 0.6)            | 77.8<br>(0.0 to 150.9)     |
| Liver cancer due to hepatitis B      | 0.1<br>(0.1 to 0.1)             | 0.2<br>(0.1 to 0.2)             | 121.1<br>(44.43 to 220.93)  | 0.1<br>(0.1 to 0.2)              | 0.1<br>(0.1 to 0.2)              | 121.1<br>(67.1 to 149.90)    | <0.05<br>(0.0 to 0.1)           | <0.05<br>(0.0 to 0.1)           | <0.05<br>(0.0 to 0.1)           | 0.3<br>(0.1 to 0.3)              | 0.3<br>(0.1 to 0.4)              | 64.0<br>(14.43 to 143.14)  | 0.1<br>(0.0 to 0.05)          | 0.1<br>(0.0 to 0.1)           | 121.1<br>(26.79 to 219.49)  | 0.2<br>(0.0 to 0.1)              | 0.3<br>(0.1 to 0.2)            | 77.8<br>(5.40 to 226.65)   |
| Liver cancer due to hepatitis C      | 0.1<br>(0.1 to 0.1)             | 0.4<br>(0.2 to 0.6)             | 319.9<br>(174.51 to 497.35) | 0.1<br>(0.1 to 0.2)              | 0.1<br>(0.1 to 0.2)              | 230.0<br>(121.10 to 368.18)  | 0.1<br>(0.0 to 0.1)             | 0.1<br>(0.0 to 0.1)             | 0.1<br>(0.0 to 0.1)             | 0.2<br>(0.1 to 0.3)              | 0.2<br>(0.1 to 0.3)              | 224.8<br>(70.00 to 422.36) | 0.2<br>(0.1 to 0.1)           | 0.2<br>(0.1 to 0.1)           | 319.9<br>(126.08 to 516.53) | 0.1<br>(0.1 to 0.2)              | 0.1<br>(0.2 to 0.5)            | 230.0<br>(86.26 to 400.81) |
| Liver cancer due to alcohol use      | 0.1<br>(0.1 to 0.2)             | 0.2<br>(0.1 to 0.3)             | 26.7<br>(19.46 to 87.11)    | 0.2<br>(0.1 to 0.3)              | 0.2<br>(0.1 to 0.3)              | 1.1<br>(38.17 to 44.12)      | 0.1<br>(0.1 to 0.2)             | 0.1<br>(0.1 to 0.2)             | 0.1<br>(0.1 to 0.2)             | 0.4<br>(0.2 to 0.4)              | 0.4<br>(0.2 to 0.4)              | 2.4<br>(42.44 to 57.38)    | <0.05<br>(0.0 to 0.1)         | <0.05<br>(0.0 to 0.1)         | 8.1<br>(45.02 to 73.44)     | 0.1<br>(0.1 to 0.2)              | 0.1<br>(0.0 to 0.1)            | 14.9<br>(53.84 to 23.46)   |
| Liver cancer due to other causes     | 0.1<br>(0.0 to 0.1)             | 0.1<br>(0.0 to 0.1)             | 26.7<br>(42.45 to 41.78)    | 0.1<br>(0.0 to 0.1)              | 0.1<br>(0.0 to 0.05)             | 26.7<br>(51.54 to 7.91)      | 0.1<br>(0.0 to 0.05)            | 0.1<br>(0.0 to 0.05)            | 0.1<br>(0.0 to 0.05)            | 0.2<br>(0.2 to 0.1)              | 0.2<br>(0.0 to 0.1)              | 64.0<br>(71.90 to 9.46)    | 0.1<br>(0.0 to 0.05)          | 0.1<br>(0.0 to 0.05)          | 121.1<br>(45.14 to 78.77)   | 0.1<br>(0.0 to 0.1)              | 0.1<br>(0.0 to 0.1)            | 77.8<br>(53.09 to 21.20)   |
| Larynx cancer                        | 0.6<br>(0.6 to 1.2)             | 0.8<br>(0.6 to 1.2)             | 26.7<br>(25.32 to 14.95)    | 0.8<br>(0.7 to 1.5)              | 0.8<br>(0.7 to 1.5)              | 26.7<br>(41.40 to 11.56)     | 0.8<br>(0.7 to 1.5)             | 0.8<br>(0.7 to 1.5)             | 0.8<br>(0.7 to 1.5)             | 0.8<br>(1.7 to 9.7)              | 0.8<br>(1.1 to 5.2)              | 26.7<br>(48.81 to 9.46)    | 0.1<br>(0.1 to 0.2)           | 0.1<br>(0.1 to 0.2)           | 0.8<br>(0.3 to 0.7)         | 0.8<br>(0.3 to 0.7)              | 0.8<br>(0.3 to 0.7)            | 26.7<br>(42.9 to 15.93)    |
| Tracheal, bronchus and lung cancer   | 9.0<br>(6.4 to 11.4)            | 8.7<br>(6.4 to 11.0)            | 3.1<br>(15.10 to 6.11)      | 13.4<br>(9.8 to 17.0)            | 10.1<br>(7.4 to 12.9)            | 24.3<br>(33.70 to 14.65)     | 5.9<br>(4.1 to 7.5)             | 4.7<br>(3.1 to 6.1)             | 2.0<br>(33.74 to 8.02)          | 20.7<br>(15.1 to 26.3)           | 11.9<br>(8.4 to 15.5)            | 24.3<br>(51.67 to 31.00)   | 2.0<br>(2.1 to 4.0)           | 2.0<br>(2.8 to 5.2)           | 11.9<br>(3.74 to 57.64)     | 1.6<br>(5.9 to 10.5)             | 1.6<br>(6.0 to 11.9)           | 7.6<br>(18.54 to 28.16)    |
| Breast cancer                        | 18.4<br>(13.2 to 25.0)          | 18.4<br>(16.1 to 31.7)          | 26.7<br>(32.5 to 36.74)     | 29.1<br>(19.6 to 38.6)           | 29.1<br>(19.6 to 38.6)           | 26.7<br>(32.5 to 36.74)      | 29.1<br>(19.6 to 38.6)          | 29.1<br>(19.6 to 38.6)          | 26.7<br>(6.93 to 96.71)         | 29.1<br>(2.2 to 6.6)             | 29.1<br>(2.2 to 6.6)             | 26.7<br>(21.64 to 42.70)   | 29.1<br>(13.1 to 24.8)        | 29.1<br>(16.0 to 31.5)        | 26.7<br>(13.20 to 36.63)    | 29.1<br>(38.0 to 71.7)           | 29.1<br>(10.6 to 63.6)         | 26.7<br>(10.6 to 63.6)     |
| Cervical cancer                      | 1.8<br>(1.2 to 2.5)             | 1.8<br>(1.2 to 2.7)             | 34.1<br>(47.07 to 18.44)    | 3.3<br>(12.1 to 18.44)           | 3.3<br>(12.1 to 18.44)           | 44.5<br>(55.88 to 18.42)     | --                              | --                              | --                              | --                               | --                               | --                         | 1.2<br>(1.2 to 2.5)           | 1.2<br>(1.2 to 2.5)           | 34.1<br>(47.07 to 18.44)    | 3.3<br>(4.3 to 9.9)              | 3.3<br>(4.3 to 9.9)            | 49.8<br>(55.56 to 29.35)   |
| Uterine cancer                       | 1.9<br>(1.3 to 2.7)             | 2.8<br>(1.8 to 4.1)             | 51.9<br>(87.9 to 102.36)    | 3.0<br>(2.0 to 4.4)              | 3.0<br>(2.0 to 4.4)              | 35.2<br>(59.07 to 59.88)     | --                              | --                              | --                              | --                               | --                               | --                         | 2.8<br>(1.3 to 2.7)           | 2.8<br>(1.8 to 4.1)           | 51.9<br>(87.9 to 102.36)    | 3.6<br>(3.6 to 8.1)              | 3.6<br>(3.6 to 8.1)            | 29.3<br>(18.54 to 65.45)   |
| Prostate cancer                      | 12.2<br>(8.8 to 16.3)           | 24.2<br>(16.8 to 33.0)          | 44.7<br>(44.07 to 142.25)   | 10.3<br>(12.3 to 22.9)           | 10.3<br>(14.4 to 36.7)           | 12.2<br>(13.09 to 90.21)     | 24.2<br>(16.8 to 33.0)          | 24.2<br>(16.8 to 33.0)          | 24.2<br>(44.07 to 142.25)       | 43.1<br>(30.4 to 56.9)           | 59.6<br>(41.1 to 81.5)           | 42.6<br>(52.5 to 72.19)    | --                            | --                            | --                          | --                               | --                             | --                         |
| Colon and rectum cancer              | 12.6<br>(9.4 to 16.3)           | 15.2<br>(11.2 to 20.9)          | 21.0<br>(8.66 to 59.1)      | 18.6<br>(12.6 to 29.1)           | 17.5<br>(8.66 to 29.1)           | 5.7<br>(13.7 to 20.9)        | 6.3<br>(0.2 to 0.2)             | 6.3<br>(0.2 to 0.2)             | 6.3<br>(13.7 to 20.9)           | 8.6<br>(0.2 to 0.2)              | 8.6<br>(0.2 to 0.2)              | 11<br>(12.58 to 20.9)      | 3<br>(4.6 to 7.6)             | 3<br>(4.6 to 7.6)             | 15.2<br>(30.70 to 21.59)    | 15.2<br>(11.6 to 21.9)           | 15.2<br>(11.6 to 21.9)         | 14.4<br>(26.66 to 1.77)    |
| Lip and oral cavity cancer           | 0.9<br>(0.9 to 1.8)             | 1.5<br>(1.1 to 2.1)             | 1.5<br>(10.53 to 51.00)     | 1.5<br>(1.4 to 2.8)              | 1.5<br>(1.3 to 2.7)              | 4.5<br>(27.67 to 20.67)      | 0.8<br>(0.6 to 1.1)             | 0.8<br>(0.6 to 1.1)             | 0.8<br>(26.12 to 58.19)         | 0.9<br>(2.1 to 4.1)              | 0.9<br>(1.6 to 3.6)              | 1.5<br>(44.91 to 10.17)    | 0.7<br>(0.3 to 0.7)           | 0.7<br>(0.4 to 0.9)           | 1.5<br>(7.95 to 85.92)      | 0.8<br>(0.9 to 1.8)              | 0.8<br>(0.9 to 2.0)            | 4.5<br>(22.13 to 29.22)    |
| Nasopharynx cancer                   | 0.1<br>(0.1 to 0.1)             | 0.1<br>(0.1 to 0.2)             | 26.7<br>(50.76 to 8.91)     | 0.1<br>(0.2 to 0.4)              | 0.1<br>(0.2 to 0.4)              | 26.7<br>(59.47 to 27.73)     | 0.1<br>(0.0 to 0.1)             | 0.1<br>(0.0 to 0.1)             | 0.1<br>(51.46 to 23.40)         | 0.1<br>(0.1 to 0.2)              | 0.1<br>(0.1 to 0.2)              | 26.7<br>(44.91 to 10.17)   | 0.1<br>(0.0 to 0.1)           | 0.1<br>(0.0 to 0.1)           | 26.7<br>(7.95 to 85.92)     | 0.1<br>(0.1 to 0.2)              | 0.1<br>(0.1 to 0.2)            | 4.5<br>(4.7 to 14.64)      |
| Other pharynx cancer                 | 0.1<br>(0.1 to 0.1)             | 0.7<br>(0.5 to 1.1)             | 27.4<br>(17.79 to 81.18)    | 1.0<br>(0.6 to 1.4)              | 1.0<br>(0.6 to 1.4)              | 14<br>(34.01 to 16.59)       | 0.4<br>(0.1 to 0.3)             | 0.4<br>(0.1 to 0.3)             | 0.4<br>(26.82 to 19.03)         | 1.5<br>(1.0 to 2.4)              | 1.5<br>(0.9 to 2.4)              | 1.7<br>(41.66 to 82.73)    | 0.2<br>(0.1 to 0.3)           | 0.2<br>(0.1 to 0.3)           | 27.4<br>(29.86 to 127.14)   | 0.5<br>(0.3 to 0.8)              | 0.5<br>(0.3 to 0.8)            | 7.8<br>(41.66 to 30.46)    |
| Gallbladder and biliary tract cancer | 0.4<br>(0.2 to 0.5)             | 0.3<br>(0.2 to 0.5)             | 11.1<br>(30.72 to 18.02)    | 0.3<br>(0.3 to 0.7)              | 0.3<br>(0.2 to 0.5)              | 31.5<br>(45.60 to 9.93)      | 0.1<br>(0.1 to 0.2)             | 0.1<br>(0.1 to 0.2)             | 0.1<br>(36.30 to 31.22)         | 0.4<br>(0.3 to 0.6)              | 0.4<br>(0.3 to 0.6)              | 31.5<br>(54.31 to 7.77)    | 0.2<br>(0.2 to 0.3)           | 0.2<br>(0.1 to 0.3)           | 11.1<br>(35.53 to 29.1)     | 0.6<br>(0.3 to 0.6)              | 0.6<br>(0.3 to 0.6)            | 27.1<br>(40.00 to 2.26)    |
| Pancreatic cancer                    | 2.5<br>(1.6 to 3.8)             | 4.0<br>(2.4 to 6.0)             | 30.0<br>(22.07 to 97.12)    | 4.3<br>(2.7 to 6.6)              | 4.3<br>(2.7 to 6.6)              | 30.0<br>(43.35 to 57.22)     | 0.9<br>(0.5 to 1.7)             | 0.9<br>(0.5 to 1.7)             | 0.9<br>(43.35 to 57.22)         | 5.3<br>(1.8 to 6.5)              | 5.3<br>(2.3 to 9.6)              | 30.0<br>(70.04 to 74.62)   | 1.6<br>(1.3 to 3.9)           | 1.6<br>(1.0 to 2.4)           | 4.3<br>(13.10 to 7.9)       | 5.8<br>(8.4 to 8.9)              | 5.8<br>(11.26 to 42.51)        |                            |
| Non-melanoma skin cancer             | 0.6<br>(0.6 to 1.5)             | 1.0<br>(1.2 to 2.9)             | 3.4<br>(17.41 to 89.32)     | 1.0<br>(0.9 to 2.1)              | 1.0<br>(0.9 to 2.1)              | 3.4<br>(17.41 to 89.32)      | 1.0<br>(0.5 to 1.8)             | 1.0<br>(0.5 to 1.8)             | 1.0<br>(43.35 to 171.75)        | 1.7<br>(1.8 to 5.6)              | 1.7<br>(1.3 to 3.8)              | 3.4<br>(7.18 to 182.52)    | 0.5<br>(0.3 to 0.8)           | 0.5<br>(0.5 to 1.5)           | 1.0<br>(1.1 to 2.9)         | 1.0<br>(1.1 to 2.9)              | 1.0<br>(6.70 to 122.25)        |                            |
| Ovarian cancer                       | 2.1<br>(2.1 to 4.0)             | 3.4<br>(2.4 to 4.5)             | 11.3<br>(9.23 to 34.55)     | 5.0<br>(3.0 to 6.5)              | 5.0<br>(3.0 to 6.5)              | 11.3<br>(23.89 to 5.7)       | --                              | --                              | --                              | 3.4<br>(1.5 to 2.8)              | 3.4<br>(1.4 to 2.7)              | 11.3<br>(23.89 to 5.7)     | 3.4<br>(0.4 to 0.8)           | 3.4<br>(0.4 to 0.8)           | 11.3<br>(9.23 to 34.55)     | 5.0<br>(6.6 to 9.1)              | 5.0<br>(5.7 to 20.27)          |                            |
| Testicular cancer                    | 0.6<br>(0.4 to 1.0)             | 1.3<br>(0.4 to 1.0)             | 7.9<br>(25.34 to 60.67)     | 1.2<br>(0.7 to 1.9)              | 1.2<br>(0.7 to 1.9)              | 7.9<br>(32.49 to 48.31)      | 0.6<br>(0.4 to 1.0)             | 0.6<br>(0.4 to 1.0)             | 0.6<br>(25.34 to 60.67)         | 2.5<br>(1.5 to 3.9)              | 2.5<br>(1.4 to 3.8)              | 7.9<br>(32.66 to 47.49)    | --                            | --                            | 7.9<br>(9.23 to 34.55)      | --                               | --                             | 7.9<br>(9.23 to 34.55)     |
| Kidney cancer                        | 1.1<br>(1.5 to 2.8)             | 2.1<br>(2.3 to 4.4)             | 4.7<br>(32.40 to 82.28)     | 4.7<br>(2.9 to 5.4)              | 4.7<br>(2.9 to 5.4)              | 4.7<br>(32.40 to 82.28)      | 4.7<br>(2.9 to 5.4)             | 4.7<br>(2.9 to 5.4)             | 4.7<br>(32.40 to 82.28)         | 4.7<br>(3.1 to 5.9)              | 4.7<br>(3.7 to 7.2)              | 4.7<br>(3.38 to 49.24)     | 0.8<br>(0.6 to                |                               |                             |                                  |                                |                            |

|                                            |                               |                               |                            |                                 |                                 |                           |                             |                             |                            |                                 |                                 |                           |                             |                             |                           |                                 |                                 |                            |
|--------------------------------------------|-------------------------------|-------------------------------|----------------------------|---------------------------------|---------------------------------|---------------------------|-----------------------------|-----------------------------|----------------------------|---------------------------------|---------------------------------|---------------------------|-----------------------------|-----------------------------|---------------------------|---------------------------------|---------------------------------|----------------------------|
| Other chronic respiratory diseases         | 11.2<br>(8.0 to 17.7)         | 1.5<br>(0.8 to 2.2)           | 86.8<br>(81.8 to 91.8)     | 18.7<br>(15.2 to 22.3)          | 2.0<br>(1.2 to 3.0)             | 89.2<br>(80.1 to 97.3)    | 4.0<br>(2.3 to 6.0)         | 0.8<br>(0.5 to 1.1)         | 99.6<br>(84.3 to 117.3)    | 14.9<br>(8.8 to 22.4)           | 2.2<br>(1.4 to 3.3)             | 85.0<br>(87.3 to 82.4)    | 7.3<br>(3.9 to 12.6)        | 0.7<br>(0.4 to 1.2)         | 90.2<br>(92.1 to 88.7)    | 21.8<br>(11.6 to 27.9)          | 1.8<br>(1.0 to 3.0)             | 93.7<br>(89.5 to 95.9)     |
| <b>Cirrhosis</b>                           | 2.5<br>(2.0 to 4.0)           | 4.4<br>(3.1 to 6.1)           | 53.1<br>(45.6 to 61.0)     | 5.2<br>(3.7 to 7.3)             | 6.6<br>(4.6 to 9.1)             | 26.2<br>(20.1 to 32.4)    | 1.7<br>(1.2 to 2.3)         | 2.8<br>(1.9 to 3.8)         | 66.0<br>(55.3 to 78.4)     | 1.2<br>(0.8 to 1.8)             | 8.5<br>(5.9 to 11.7)            | 3.1<br>(2.4 to 4.2)       | 1.7<br>(0.9 to 1.7)         | 1.7<br>(1.2 to 2.3)         | 35.4<br>(25.8 to 45.9)    | 4.2<br>(2.9 to 5.9)             | 4.8<br>(3.4 to 6.6)             | 14.8<br>(6.9 to 20.2)      |
| Cirrhosis due to hepatitis B               | 0.3<br>(0.2 to 0.4)           | 0.1<br>(0.3 to 0.7)           | 0.1<br>(23.8 to 104.0)     | 0.1<br>(0.3 to 0.8)             | 0.1<br>(0.4 to 1.0)             | 0.1<br>(0.9 to 4.7)       | 0.1<br>(0.1 to 0.2)         | 0.1<br>(0.2 to 0.4)         | 0.1<br>(22.4 to 115.7)     | 0.1<br>(0.4 to 0.8)             | 0.1<br>(0.5 to 1.1)             | 0.1<br>(1.08 to 72.8)     | 0.1<br>(0.1 to 0.2)         | 0.1<br>(0.1 to 0.3)         | 0.1<br>(4.01 to 135.0)    | 0.1<br>(0.3 to 0.7)             | 0.1<br>(0.4 to 0.9)             | 0.1<br>(14.64 to 54.5)     |
| Cirrhosis due to hepatitis C               | 1.0<br>(0.7 to 1.5)           | 2.1<br>(1.4 to 2.9)           | 100.1<br>(89.48 to 138.13) | 1.9<br>(1.3 to 2.7)             | 3.1<br>(2.1 to 4.3)             | 132.1<br>(88.36 to 190.0) | 0.5<br>(0.3 to 0.8)         | 1.2<br>(0.8 to 1.7)         | 132.1<br>(77.55 to 215.8)  | 2.0<br>(1.2 to 3.4)             | 3.6<br>(2.4 to 5.1)             | 2.0<br>(1.4 to 2.8)       | 3.6<br>(2.6 to 5.0)         | 2.0<br>(1.6 to 2.6)         | 85.3<br>(82.64 to 114.1)  | 2.6<br>(1.2 to 4.6)             | 0.5<br>(0.3 to 0.7)             | 1.8<br>(1.7 to 1.8)        |
| Cirrhosis due to alcohol use               | 0.9<br>(0.5 to 1.7)           | 1.2<br>(0.8 to 1.8)           | 1.1<br>(1.5 to 0.3)        | 1.2<br>(1.4 to 2.0)             | 1.1<br>(1.2 to 2.5)             | 1.2<br>(3.1 to 2.4)       | 1.2<br>(0.6 to 1.2)         | 1.2<br>(0.7 to 1.4)         | 1.2<br>(6.1 to 21.9)       | 1.2<br>(1.2 to 4.4)             | 1.2<br>(1.9 to 4.3)             | 1.2<br>(2.7 to 13.1)      | 1.2<br>(3.0 to 0.6)         | 1.2<br>(0.2 to 0.4)         | 1.2<br>(26.2 to 41.8)     | 1.2<br>(0.5 to 1.1)             | 1.2<br>(0.8 to 1.9)             | 1.2<br>(5.93 to 22.1)      |
| Cirrhosis due to other causes              | 0.3<br>(0.2 to 0.5)           | 0.4<br>(0.2 to 0.9)           | 0.4<br>(60.34 to 540.93)   | 0.4<br>(0.7 to 1.5)             | 0.4<br>(0.8 to 0.9)             | 0.4<br>(35.86 to 37.46)   | 0.4<br>(0.4 to 0.5)         | 0.4<br>(0.2 to 0.2)         | 0.4<br>(68.23 to 209.75)   | 0.4<br>(0.4 to 0.8)             | 0.4<br>(0.8 to 0.8)             | 0.4<br>(40.28 to 147.26)  | 0.4<br>(0.2 to 0.2)         | 0.4<br>(0.2 to 0.4)         | 0.4<br>(21.78 to 131.17)  | 0.4<br>(0.6 to 0.9)             | 0.4<br>(0.6 to 0.9)             | 0.4<br>(5.33 to 18.9)      |
| <b>Digestive diseases</b>                  | 113.5<br>(67.2 to 124.4)      | 15.9<br>(8.1 to 151.8)        | 35.1<br>(11.66 to 30.58)   | 157.9<br>(113.1 to 210.4)       | 35.1<br>(11.3 to 215.0)         | 157.9<br>(5.09 to 11.3)   | 35.1<br>(29.9 to 49.5)      | 157.9<br>(80.3 to 67.3)     | 35.1<br>(22.75 to 50.8)    | 157.9<br>(102.5 to 188.6)       | 35.1<br>(109.7 to 205.2)        | 157.9<br>(2.80 to 20.56)  | 35.1<br>(40.3 to 75.1)      | 157.9<br>(44.6 to 83.7)     | 35.1<br>(1.06 to 21.78)   | 171.1<br>(121.1 to 228.5)       | 0.2<br>(1.21 to 228.5)          | 0.2<br>(8.61 to 91.1)      |
| Peptic ulcer disease                       | 12.7<br>(12.2 to 24.6)        | 0.4<br>(0.4 to 11.3)          | 99.1<br>(66.32 to 51.74)   | 0.4<br>(17.1 to 34.7)           | 0.4<br>(6.0 to 12.1)            | 0.4<br>(6.0 to 12.1)      | 0.4<br>(1.1 to 2.5)         | 0.4<br>(1.1 to 2.5)         | 0.4<br>(67.39 to 54.42)    | 0.4<br>(1.1 to 2.5)             | 0.4<br>(2.9 to 6.2)             | 0.4<br>(4.0 to 7.4)       | 0.4<br>(9.1 to 18.5)        | 0.4<br>(4.4 to 8.8)         | 0.4<br>(7.7 to 49.08)     | 0.4<br>(2.1 to 46.0)            | 0.4<br>(4.4 to 8.8)             | 0.4<br>(42.46 to 59.3)     |
| Gastritis and duodenitis                   | 4.3<br>(2.9 to 6.1)           | 0.5<br>(4.0 to 9.1)           | 51.6<br>(42.0 to 13.1)     | 7.6<br>(5.9 to 10.7)            | 9.4<br>(6.9 to 13.1)            | 23.8<br>(15.32 to 32.00)  | 0.7<br>(0.5 to 0.7)         | 1.1<br>(0.8 to 1.9)         | 81.4<br>(65.9 to 114.7)    | 2.8<br>(1.9 to 4.2)             | 1.8<br>(2.5 to 5.5)             | 2.8<br>(5.51 to 61.72)    | 1.8<br>(2.5 to 5.5)         | 2.8<br>(5.6 to 7.3)         | 95.0<br>(36.74 to 54.47)  | 1.8<br>(4.0 to 18.7)            | 1.8<br>(10.3 to 20.5)           | 1.8<br>(13.80 to 32.40)    |
| Appendicitis                               | 0.4<br>(0.3 to 0.6)           | 0.5<br>(0.3 to 0.6)           | 1.0<br>(5.32 to 17.50)     | 1.0<br>(0.7 to 1.3)             | 1.0<br>(0.7 to 1.3)             | 1.0<br>(13.38 to 11.22)   | 1.0<br>(0.2 to 0.3)         | 1.0<br>(0.2 to 0.4)         | 1.0<br>(3.72 to 28.79)     | 1.0<br>(0.7 to 1.4)             | 1.0<br>(0.7 to 1.5)             | 1.0<br>(12.89 to 21.23)   | 1.0<br>(0.1 to 0.3)         | 1.0<br>(0.1 to 0.3)         | 1.0<br>(13.50 to 16.28)   | 0.2<br>(0.6 to 1.3)             | 0.2<br>(0.6 to 1.3)             | 0.2<br>(1.24 to 2.8)       |
| Paralytic ileus and intestinal obstruction | 0.2<br>(0.2 to 0.2)           | 0.3<br>(0.2 to 0.4)           | 58.7<br>(40.0 to 41.28)    | 0.3<br>(0.2 to 0.4)             | 0.3<br>(0.2 to 0.4)             | 0.3<br>(43.34 to 74.13)   | 0.3<br>(0.2 to 0.4)         | 0.3<br>(0.2 to 0.4)         | 0.3<br>(56.30 to 95.66)    | 0.3<br>(0.2 to 0.4)             | 0.3<br>(0.3 to 0.5)             | 0.3<br>(21.24 to 51.72)   | 0.3<br>(0.1 to 0.2)         | 0.3<br>(0.1 to 0.2)         | 0.3<br>(15.69 to 39.62)   | 0.3<br>(0.2 to 0.4)             | 0.3<br>(0.2 to 0.4)             | 0.3<br>(2.46 to 10.54)     |
| Inguinal, femoral, and abdominal hernia    | 4.2<br>(4.0 to 8)             | 4.9<br>(2.0 to 9.0)           | 16.0<br>(9.0 to 22.98)     | 6.2<br>(3.0 to 11.4)            | 5.8<br>(2.9 to 10.7)            | 6.9<br>(12.13 to 1.68)    | 2.6<br>(1.3 to 4.8)         | 3.2<br>(1.6 to 5.5)         | 22.7<br>(13.59 to 32.52)   | 9.6<br>(4.8 to 15.7)            | 8.5<br>(4.3 to 15.7)            | 11.5<br>(7.2 to 14.87)    | 1.6<br>(0.8 to 3.1)         | 1.6<br>(1.4 to 3.1)         | 4.9<br>(4.4 to 5.35)      | 3.4<br>(1.7 to 7.0)             | 4<br>(1.7 to 6.4)               | 8.3<br>(1.57 to 0.48)      |
| Inflammatory bowel disease                 | 40.8<br>(28.2 to 55.3)        | 58.3<br>(39.8 to 79.2)        | 19.5<br>(29.37 to 55.90)   | 74.1<br>(51.1 to 100.5)         | 49.9<br>(60.4 to 120.8)         | 74.1<br>(7.72 to 30.63)   | 20.1<br>(13.6 to 27.4)      | 20.1<br>(20.2 to 41.1)      | 49.9<br>(7.72 to 30.63)    | 74.1<br>(52.4 to 105.6)         | 20.1<br>(63.1 to 129.3)         | 20.1<br>(7.34 to 39.3)    | 20.1<br>(14.2 to 28.2)      | 20.1<br>(18.3 to 36.8)      | 20.1<br>(20.88 to 56.23)  | 20.1<br>(49.0 to 97.7)          | 20.1<br>(56.9 to 114.1)         | 20.1<br>(3.18 to 34.10)    |
| Vascular intestinal disorders              | 0.1<br>(0.1 to 0.2)           | 0.2<br>(0.1 to 0.3)           | 29.4<br>(0.1 to 0.3)       | 0.2<br>(0.1 to 0.3)             | 0.2<br>(0.1 to 0.3)             | 33<br>(8.17 to 55.29)     | 0.2<br>(0.1 to 0.1)         | 0.2<br>(0.1 to 0.1)         | 38.8<br>(10.24 to 70.72)   | 0.2<br>(0.2 to 0.3)             | 0.2<br>(0.2 to 0.3)             | 0.2<br>(18.26 to 23.88)   | 0.2<br>(0.1 to 0.1)         | 0.2<br>(0.1 to 0.1)         | 0.2<br>(1.77 to 27.48)    | 0.2<br>(0.1 to 0.3)             | 0.2<br>(0.1 to 0.3)             | 0.2<br>(15.51 to 27.48)    |
| Gallbladder and biliary diseases           | 5.7<br>(3.9 to 7.8)           | 9.0<br>(6.2 to 12.2)          | 56.9<br>(7.25 to 72.85)    | 9.3<br>(6.3 to 12.7)            | 11.7<br>(7.9 to 15.7)           | 26.2<br>(9.39 to 49.43)   | 1.9<br>(1.3 to 2.6)         | 3.6<br>(2.5 to 4.9)         | 110.1<br>(67.39 to 115.10) | 6.8<br>(4.7 to 9.4)             | 10.1<br>(6.9 to 13.8)           | 48.3<br>(28.45 to 66.70)  | 11.4<br>(2.6 to 5.3)        | 11.4<br>(3.6 to 7.3)        | 39.0<br>(17.9 to 56.0)    | 11.4<br>(7.7 to 15.8)           | 11.4<br>(8.8 to 14.0)           | 11.4<br>(1.78 to 30.84)    |
| Pancreatitis                               | 2.4<br>(2.4 to 4.6)           | 4.5<br>(3.4 to 6.5)           | 35.1<br>(35.12 to 49.19)   | 4.5<br>(4.3 to 8.1)             | 4.5<br>(5.1 to 9.9)             | 4.5<br>(3.1 to 25.2)      | 4.5<br>(3.1 to 2.6)         | 4.5<br>(4.0 to 3.8)         | 4.5<br>(5.2 to 10.0)       | 4.5<br>(4.5 to 12.9)            | 4.5<br>(4.5 to 12.9)            | 4.5<br>(9.7 to 21.2)      | 4.5<br>(1.0 to 2.4)         | 4.5<br>(4.4 to 6.6)         | 4.5<br>(7.19 to 42.56)    | 4.5<br>(4.4 to 6.6)             | 4.5<br>(4.1 to 7.8)             | 4.5<br>(9.72 to 29.62)     |
| Other digestive diseases                   | 11.6<br>(11.6 to 23.1)        | 21.0<br>(14.0 to 23.5)        | 29.9<br>(34.8 to 23.57)    | 21.0<br>(15.9 to 38.8)          | 21.0<br>(15.9 to 38.8)          | 21.0<br>(11.96 to 30.12)  | 21.0<br>(16.6 to 7.7)       | 21.0<br>(11.5 to 29.3)      | 21.0<br>(35.26 to 89.19)   | 21.0<br>(13.2 to 33.5)          | 21.0<br>(13.2 to 33.5)          | 21.0<br>(45.44 to 135.15) | 21.0<br>(9.9 to 31.8)       | 21.0<br>(8.9 to 31.8)       | 21.0<br>(4.44 to 135.15)  | 21.0<br>(23.2 to 46.0)          | 21.0<br>(23.9 to 46.0)          | 21.0<br>(11.72 to 27.2)    |
| <b>Neurological disorders</b>              | 875.2<br>(375.2 to 726.5)     | 117.7<br>(47.2 to 895.3)      | 34.7<br>(16.42 to 34.02)   | 109.3<br>(67.4 to 1340.4)       | 117.7<br>(720.2 to 1395.7)      | 34.7<br>(2.44 to 13.08)   | 109.3<br>(127.0 to 241.1)   | 117.7<br>(168.0 to 309.8)   | 34.7<br>(18.84 to 62.28)   | 109.3<br>(512.0 to 977.5)       | 117.7<br>(531.7 to 1008.6)      | 34.7<br>(5.55 to 14.44)   | 109.3<br>(28.4 to 478.7)    | 117.7<br>(386.9 to 982.7)   | 34.7<br>(13.19 to 32.47)  | 109.3<br>(81.2 to 1,672.2)      | 117.7<br>(895.5 to 1,292.4)     | 117.7<br>(2.07 to 16.05)   |
| Alzheimer disease and other dementias      | 86.3<br>(63.0 to 150.8)       | 206.3<br>(118.6 to 206.3)     | 20.4<br>(20.24 to 50.79)   | 206.3<br>(112.3 to 195.7)       | 206.3<br>(112.3 to 195.7)       | 20.4<br>(11.40 to 10.40)  | 206.3<br>(28.1 to 47.7)     | 206.3<br>(38.8 to 68.1)     | 20.4<br>(64.54 to 85.07)   | 206.3<br>(109.2 to 157.2)       | 206.3<br>(90.9 to 150.8)        | 20.4<br>(10.10 to 10.4)   | 206.3<br>(62.4 to 109.9)    | 206.3<br>(77.7 to 126.6)    | 20.4<br>(6.42 to 45.6)    | 206.3<br>(125.2 to 224.1)       | 206.3<br>(12.2 to 18.64)        | 206.3<br>(0.40 to 2.84)    |
| Parkinson disease                          | 4.6<br>(4.6 to 10.8)          | 15.8<br>(6.0 to 13.8)         | 27.2<br>(20.94 to 11.49)   | 15.8<br>(6.0 to 13.8)           | 15.8<br>(6.0 to 13.8)           | 27.2<br>(6.0 to 15.6)     | 15.8<br>(6.0 to 13.8)       | 15.8<br>(6.0 to 13.8)       | 27.2<br>(6.0 to 15.6)      | 15.8<br>(2.78 to 10.5)          | 15.8<br>(2.78 to 10.5)          | 27.2<br>(4.51 to 61.81)   | 15.8<br>(6.0 to 13.8)       | 15.8<br>(6.0 to 13.8)       | 27.2<br>(3.32 to 22.2)    | 15.8<br>(6.0 to 13.8)           | 15.8<br>(6.0 to 13.8)           | 15.8<br>(5.63 to 8.97)     |
| Epilepsy                                   | 39.6<br>(39.6 to 89.4)        | 62.4<br>(39.1 to 92.4)        | 52.4<br>(31.09 to 52.54)   | 129.6<br>(81.2 to 184.6)        | 62.4<br>(71.3 to 169.2)         | 52.4<br>(38.73 to 34.98)  | 129.6<br>(20.5 to 47.4)     | 62.4<br>(20.7 to 48.4)      | 52.4<br>(30.29 to 56.73)   | 129.6<br>(88.8 to 200.8)        | 62.4<br>(76.5 to 180.3)         | 52.4<br>(39.05 to 38.84)  | 129.6<br>(18.8 to 42.6)     | 62.4<br>(18.6 to 44.0)      | 52.4<br>(13.72 to 51.10)  | 129.6<br>(75.6 to 171.0)        | 62.4<br>(66.8 to 158.6)         | 129.6<br>(1.89 to 14.83)   |
| Multiple sclerosis                         | 241.6<br>(144.9 to 257.6)     | 265.2<br>(161.2 to 33.4)      | 10.0<br>(50.29 to 11.29)   | 491.3<br>(15.9 to 49.1)         | 265.2<br>(15.9 to 49.1)         | 10.0<br>(2.9 to 16.15)    | 491.3<br>(40.7 to 215.3)    | 265.2<br>(10.0 to 10.0)     | 10.0<br>(6.2 to 12.9)      | 309.9<br>(317.0 to 309.9)       | 265.2<br>(10.0 to 10.0)         | 10.0<br>(3.4 to 26.5)     | 265.2<br>(6.6 to 12.5)      | 10.0<br>(12.2 to 22.5)      | 265.2<br>(45.85 to 126.5) | 10.0<br>(24.7 to 46.9)          | 10.0<br>(66.5 to 65.8)          | 10.0<br>(14.0 to 14.95)    |
| Migraine                                   | 15.5<br>(7.4 to 27.5)         | 21.7<br>(10.8 to 37.5)        | 26.3<br>(45.36 to 68.15)   | 21.7<br>(18.9 to 66.6)          | 26.3<br>(11.88 to 49.9)         | 26.3<br>(4.76 to 16.4)    | 21.7<br>(2.8 to 10.0)       | 26.3<br>(4.76 to 16.4)      | 26.3<br>(60.28 to 105.8)   | 21.7<br>(14.2 to 42.1)          | 26.3<br>(16.6 to 58.8)          | 26.3<br>(24.3 to 77.7)    | 21.7<br>(45.5 to 17.6)      | 26.3<br>(59.5 to 21.4)      | 26.3<br>(18.18 to 56.02)  | 26.3<br>(17.6 to 49.6)          | 26.3<br>(29.0 to 28.6)          | 26.3<br>(1.34 to 3.35)     |
| Tension-type headache                      | 44.4<br>(20.0 to 18.2)        | 205.2<br>(18.6 to 33.4)       | 10.0<br>(54.6 to 11.29)    | 491.3<br>(15.9 to 49.1)         | 205.2<br>(15.9 to 49.1)         | 10.0<br>(2.9 to 16.15)    | 491.3<br>(40.7 to 215.3)    | 205.2<br>(10.0 to 10.0)     | 10.0<br>(6.2 to 12.9)      | 309.9<br>(317.0 to 309.9)       | 205.2<br>(10.0 to 10.0)         | 10.0<br>(3.4 to 26.5)     | 205.2<br>(6.6 to 12.5)      | 10.0<br>(12.2 to 22.5)      | 205.2<br>(45.85 to 126.5) | 10.0<br>(24.7 to 46.9)          | 10.0<br>(66.5 to 65.8)          | 10.0<br>(14.0 to 14.95)    |
| Medication overuse headache                | 25.9<br>(18.3 to 39.6)        | 30.4<br>(22.3 to 39.6)        | 17.3<br>(20.3 to 11.49)    | 35.6<br>(20.3 to 11.49)         | 17.3<br>(20.3 to 11.49)         | 35.6<br>(6.0 to 15.6)     | 17.3<br>(6.0 to 15.6)       | 35.6<br>(6.0 to 15.6)       | 17.3<br>(6.0 to 15.6)      | 35.6<br>(2.8 to 10.5)           | 17.3<br>(2.8 to 10.5)           | 35.6<br>(4.51 to 61.81)   | 35.6<br>(6.0 to 13.8)       | 17.3<br>(6.0 to 13.8)       | 35.6<br>(49.42 to 338.5)  | 17.3<br>(6.0 to 13.8)           | 17.3<br>(6.0 to 13.8)           | 17.3<br>(5.04 to 11.6)     |
| Other neurological disorders               | 1,152.5<br>(823.0 to 1,547.8) | 1,264.6<br>(903.1 to 1,682.0) | 9.7<br>(7.88 to 11.93)     | 2,372.6<br>(1,668.4 to 3,142.9) | 1,152.5<br>(1,641.4 to 1,110.0) | 9.7<br>(2.94 to 0.03)     | 2,372.6<br>(461.6 to 744.0) | 1,152.5<br>(461.6 to 744.0) | 9.7<br>(8.67 to 13.47)     | 2,372.6<br>(1,675.6 to 3,094.7) | 1,152.5<br>(1,654.4 to 3,096.1) | 9.7<br>(2.85 to 0.92)     | 2,372.6<br>(418.6 to 802.5) | 1,152.5<br>(452.0 to 884.4) | 9.7<br>(6.25 to 11.34)    | 2,372.6<br>(1,639.2 to 1,553.1) | 1,152.5<br>(1,616.9 to 1,200.9) | 1,152.5<br>(1,358 to 0.07) |
| Schizophrenia                              | 63.1<br>(63.1 to 109.6)       | 116.3<br>(72.8 to 125.0)      | 116.3<br>(11.88 to 18.46)  | 116.3<br>(122.4 to 213.6)       | 116.3<br>(121.0 to 210.2)       | 116.3<br>(4.18 to 2.17)   | 116.3<br>(35.0 to 60.6)     | 116.3<br>(40.3 to 69.9)     | 116.3<br>(11.05 to 21.4)   | 116.3<br>(138.6 to 240.2)       | 116.3<br>(138.6 to 240.2)       | 116.3<br>(4.58 to 4.45)   | 116.3<br>(28.2 to 46.6)     | 116.3<br>(32.4 to 45.2)     | 116.3<br>(6.00 to 18.26)  | 116.3<br>(106.7 to 184.9)       | 116.3<br>(105.7 to 181.4)       | 116.3<br>(4.36 to 3.36)    |
| Alcohol use disorders                      | 37.2<br>(37.2 to 81.1)        | 116.3<br>(47.2 to 101.1)      | 21.0<br>(21.0 to 30.80)    | 116.3<br>(76.2 to 165.8)        | 116.3<br>(89.2 to 192.0)        | 21.0<br>(12.55 to 20.59)  | 116.3<br>(27.5 to 99.8)     | 116.3<br>(34.0 to 76.1)     | 21.0<br>(22.84 to 33.94)   | 116.3<br>(113.1 to 246.5)       | 116.3<br>(144.1 to 290.7)       | 21.0<br>(13.24 to 23.15)  | 116.3<br>(18.8 to 20.9)     | 116.3<br>(118.0 to 25.1)    | 21.0<br>(13.10 to 25.17)  | 116.3<br>(39.6 to 94.9)         | 116.3<br>(43.9 to 9.4)          | 116.3<br>(5.65 to 14.98)   |
| Drug use disorders                         | 137.1<br>(87.2 to 170.8)      | 127.1<br>(89.2 to 170.8)      | 127.1<br>(183.5 to 350.0)  | 127.1<br>(127.1 to 250.4)       | 127.1<br>(183.5 to 350.0)       | 127.1<br>(6.8 to 13.9)    | 127.1<br>(27.5 to 99.8)     | 127.1<br>(34.0 to 76.1)     | 127.1<br>(28.5 to 118.8)   | 127.1<br>(113.1 to 246.5)       | 127.1<br>(144.1 to 290.7)       | 127.1<br>(13.24 to 23.15) | 127.1<br>(18.8 to 20.9)     | 127.1<br>(118.0 to 25.1)    | 127.1<br>(13.10 to 25     |                                 |                                 |                            |

|                                                   |                              |                                 |                           |                                 |                                 |                           |                              |                                 |                           |                          |                          |                         |                      |                     |                      |                                 |                      |
|---------------------------------------------------|------------------------------|---------------------------------|---------------------------|---------------------------------|---------------------------------|---------------------------|------------------------------|---------------------------------|---------------------------|--------------------------|--------------------------|-------------------------|----------------------|---------------------|----------------------|---------------------------------|----------------------|
| Benign prostatic hyperplasia                      | 41.0<br>(36.0 to 57.7)       | 53.6<br>(50.0 to 57.4)          | 30.5<br>(26.5 to 34.7)    | 60.2<br>(55.0 to 65.4)          | 63.4<br>(58.0 to 68.8)          | 5.3<br>(2.0 to 8.6)       | 41.0<br>(36.0 to 46.0)       | 53.6<br>(50.0 to 57.4)          | 30.5<br>(26.5 to 34.7)    | 142.0<br>(99.2 to 194.4) | 136.4<br>(89.1 to 194.4) | -9.9<br>(-6.75 to 8.87) | --                   | --                  | --                   | --                              |                      |
| Male infertility due to other causes              | 1.4<br>(0.6 to 2.9)          | 1.5<br>(0.6 to 2.9)             | 3.6<br>(1.1 to 20.2)      | 2.9<br>(1.3 to 5.8)             | 2.9<br>(1.3 to 5.8)             | 0.4<br>(-14.38 to 16.36)  | 1.4<br>(0.6 to 2.9)          | 1.5<br>(0.6 to 2.9)             | 3.6<br>(1.1 to 20.2)      | 142.0<br>(99.2 to 194.4) | 136.4<br>(89.1 to 194.4) | -9.9<br>(-6.75 to 8.87) | --                   | --                  | --                   | --                              |                      |
| Other urinary diseases                            | 0.5<br>(0.3 to 1.7)          | 0.5<br>(0.4 to 1.8)             | 1.4<br>(-28.63 to 129.99) | 1.4<br>(0.5 to 2.9)             | 1.4<br>(0.5 to 2.4)             | 0.1<br>(-42.96 to 79.98)  | 0.5<br>(0.3 to 1.7)          | 0.5<br>(0.4 to 1.8)             | 1.4<br>(-28.63 to 129.99) | 142.0<br>(99.2 to 194.4) | 136.4<br>(89.1 to 194.4) | -9.9<br>(-6.75 to 8.87) | 0.1<br>(-0.3 to 0.5) | 0.2<br>(0.1 to 0.3) | 0.1<br>(-0.2 to 0.1) | 0.5<br>(-1.12 to 101.16)        | 0.4<br>(0.2 to 0.8)  |
| Gynecological diseases                            | 59.7<br>(38.5 to 92.1)       | 68.1<br>(43.4 to 105.8)         | 14.0<br>(8.18 to 20.77)   | 121.4<br>(77.8 to 185.4)        | 121.4<br>(77.8 to 185.4)        | 0.8<br>(-4.13 to 6.82)    | 59.7<br>(38.5 to 92.1)       | 68.1<br>(43.4 to 105.8)         | 14.0<br>(8.18 to 20.77)   | 142.0<br>(99.2 to 194.4) | 136.4<br>(89.1 to 194.4) | -9.9<br>(-6.75 to 8.87) | 0.1<br>(-0.3 to 0.5) | 0.2<br>(0.1 to 0.3) | 0.1<br>(-0.2 to 0.1) | 51.2<br>(-1.12 to 101.16)       | 0.5<br>(0.2 to 0.8)  |
| Uterine fibroids                                  | 7.7<br>(7.3 to 28.8)         | 8.4<br>(4.4 to 105.8)           | 12.3<br>(12.52 to 33.3)   | 15.7<br>(15.6 to 57.9)          | 15.7<br>(15.6 to 57.9)          | 2.1<br>(-5.75 to 11.32)   | 7.7<br>(7.3 to 28.8)         | 8.4<br>(4.4 to 105.8)           | 12.3<br>(12.52 to 33.3)   | 142.0<br>(99.2 to 194.4) | 136.4<br>(89.1 to 194.4) | -9.9<br>(-6.75 to 8.87) | 0.1<br>(-0.3 to 0.5) | 0.2<br>(0.1 to 0.3) | 0.1<br>(-0.2 to 0.1) | 14.0<br>(8.18 to 20.77)         | 0.6<br>(0.4 to 1.0)  |
| Polycystic ovary syndrome                         | 7.7<br>(3.8 to 14.7)         | 8.4<br>(4.2 to 16.2)            | 12.3<br>(12.52 to 33.3)   | 15.7<br>(15.6 to 57.9)          | 15.7<br>(15.6 to 57.9)          | 2.1<br>(-5.75 to 11.32)   | 7.7<br>(3.8 to 14.7)         | 8.4<br>(4.2 to 16.2)            | 12.3<br>(12.52 to 33.3)   | 142.0<br>(99.2 to 194.4) | 136.4<br>(89.1 to 194.4) | -9.9<br>(-6.75 to 8.87) | 0.1<br>(-0.3 to 0.5) | 0.2<br>(0.1 to 0.3) | 0.1<br>(-0.2 to 0.1) | 14.0<br>(8.18 to 20.77)         | 0.6<br>(0.4 to 1.0)  |
| Female infertility due to other causes            | 0.3<br>(0.1 to 0.7)          | 0.3<br>(0.1 to 0.9)             | 0.4<br>(-52.48 to 172.21) | 0.4<br>(0.2 to 1.5)             | 0.4<br>(0.2 to 1.5)             | 0.1<br>(-14.19 to 161.82) | 0.3<br>(0.1 to 0.7)          | 0.3<br>(0.1 to 0.9)             | 0.4<br>(-52.48 to 172.21) | 142.0<br>(99.2 to 194.4) | 136.4<br>(89.1 to 194.4) | -9.9<br>(-6.75 to 8.87) | 0.1<br>(-0.3 to 0.5) | 0.2<br>(0.1 to 0.3) | 0.1<br>(-0.2 to 0.1) | 0.4<br>(-54.27 to 161.77)       | 0.5<br>(0.2 to 0.8)  |
| Endometriosis                                     | 12.5<br>(8.3 to 17.4)        | 13.6<br>(5.08 to 25.55)         | 1.6<br>(-18.84 to 14.25)  | 25.2<br>(16.9 to 35.4)          | 25.2<br>(16.9 to 35.4)          | 0.1<br>(-13.84 to 14.25)  | 12.5<br>(8.3 to 17.4)        | 13.6<br>(5.08 to 25.55)         | 1.6<br>(-18.84 to 14.25)  | 142.0<br>(99.2 to 194.4) | 136.4<br>(89.1 to 194.4) | -9.9<br>(-6.75 to 8.87) | 0.1<br>(-0.3 to 0.5) | 0.2<br>(0.1 to 0.3) | 0.1<br>(-0.2 to 0.1) | 13.6<br>(5.08 to 25.55)         | 0.7<br>(0.4 to 1.0)  |
| Genital prolapse                                  | 9.6<br>(4.7 to 18.0)         | 11.0<br>(5.4 to 20.5)           | 15.2<br>(9.54 to 20.69)   | 18.2<br>(8.7 to 38.4)           | 18.2<br>(8.7 to 38.4)           | -2.3<br>(-6.49 to 2.64)   | 9.6<br>(4.7 to 18.0)         | 11.0<br>(5.4 to 20.5)           | 15.2<br>(9.54 to 20.69)   | 142.0<br>(99.2 to 194.4) | 136.4<br>(89.1 to 194.4) | -9.9<br>(-6.75 to 8.87) | 0.1<br>(-0.3 to 0.5) | 0.2<br>(0.1 to 0.3) | 0.1<br>(-0.2 to 0.1) | 15.2<br>(9.54 to 20.69)         | 0.9<br>(0.6 to 1.2)  |
| Premenstrual syndrome                             | 2.8<br>(2.0 to 5.2)          | 4.5<br>(2.0 to 6.6)             | 26.6<br>(5.3 to 59.01)    | 7.8<br>(5.4 to 10.7)            | 7.8<br>(5.4 to 10.7)            | 6.1<br>(-7.11 to 44.03)   | 2.8<br>(2.0 to 5.2)          | 4.5<br>(2.0 to 6.6)             | 26.6<br>(5.3 to 59.01)    | 142.0<br>(99.2 to 194.4) | 136.4<br>(89.1 to 194.4) | -9.9<br>(-6.75 to 8.87) | 0.1<br>(-0.3 to 0.5) | 0.2<br>(0.1 to 0.3) | 0.1<br>(-0.2 to 0.1) | 26.6<br>(5.3 to 59.01)          | 0.5<br>(0.2 to 0.8)  |
| Other gynecological diseases                      | 51.7<br>(46.0 to 57.4)       | 53.3<br>(35.0 to 76.4)          | 3.1<br>(-0.36 to 7.34)    | 122.1<br>(81.7 to 174.6)        | 122.1<br>(81.7 to 174.6)        | 6.4<br>(-9.57 to 2.43)    | 51.7<br>(46.0 to 57.4)       | 53.3<br>(35.0 to 76.4)          | 3.1<br>(-0.36 to 7.34)    | 142.0<br>(99.2 to 194.4) | 136.4<br>(89.1 to 194.4) | -9.9<br>(-6.75 to 8.87) | 0.1<br>(-0.3 to 0.5) | 0.2<br>(0.1 to 0.3) | 0.1<br>(-0.2 to 0.1) | 122.1<br>(81.7 to 174.6)        | 0.5<br>(0.2 to 0.8)  |
| Hemoglobinopathies and hemolytic anemias          | 0.1<br>(0.1 to 0.2)          | 0.1<br>(0.1 to 0.2)             | -10.08 to 19.42           | 0.1<br>(0.1 to 0.5)             | 0.1<br>(0.1 to 0.5)             | -12.36 to 17.80           | 0.1<br>(0.1 to 0.2)          | 0.1<br>(0.1 to 0.2)             | -10.08 to 19.42           | 142.0<br>(99.2 to 194.4) | 136.4<br>(89.1 to 194.4) | -9.9<br>(-6.75 to 8.87) | 0.1<br>(-0.3 to 0.5) | 0.2<br>(0.1 to 0.3) | 0.1<br>(-0.2 to 0.1) | 0.1<br>(-0.2 to 0.1)            | 0.1<br>(-0.2 to 0.1) |
| Thalassemias                                      | 19.5 to 41.3                 | 20.6 to 43.5                    | 15.2 to 19.2              | 45.4 to 91.3                    | 45.4 to 91.3                    | 2.6 to 5.8                | 19.5 to 41.3                 | 20.6 to 43.5                    | 15.2 to 19.2              | 142.0<br>(99.2 to 194.4) | 136.4<br>(89.1 to 194.4) | -9.9<br>(-6.75 to 8.87) | 0.1<br>(-0.3 to 0.5) | 0.2<br>(0.1 to 0.3) | 0.1<br>(-0.2 to 0.1) | 15.2 to 19.2                    | 0.5<br>(0.2 to 0.8)  |
| Sickle cell disorders                             | 0.6<br>(0.4 to 0.9)          | 0.6<br>(0.4 to 0.9)             | 10.1<br>(1.33 to 19.40)   | 1.3<br>(0.9 to 2.0)             | 1.3<br>(0.9 to 2.0)             | 2.7<br>(-5.02 to 10.21)   | 0.6<br>(0.4 to 0.9)          | 0.6<br>(0.4 to 0.9)             | 10.1<br>(1.33 to 19.40)   | 142.0<br>(99.2 to 194.4) | 136.4<br>(89.1 to 194.4) | -9.9<br>(-6.75 to 8.87) | 0.1<br>(-0.3 to 0.5) | 0.2<br>(0.1 to 0.3) | 0.1<br>(-0.2 to 0.1) | 10.1<br>(1.33 to 19.40)         | 0.8<br>(0.6 to 1.0)  |
| Sickle cell trait                                 | 10.4 to 23.2                 | 10.4 to 23.2                    | 14.89 to 22.2             | 25.5 to 56.1                    | 25.5 to 56.1                    | 2.2 to 7.13               | 10.4 to 23.2                 | 10.4 to 23.2                    | 14.89 to 22.2             | 142.0<br>(99.2 to 194.4) | 136.4<br>(89.1 to 194.4) | -9.9<br>(-6.75 to 8.87) | 0.1<br>(-0.3 to 0.5) | 0.2<br>(0.1 to 0.3) | 0.1<br>(-0.2 to 0.1) | 14.89 to 22.2                   | 0.8<br>(0.6 to 1.0)  |
| GGPD deficiency                                   | 0.1<br>(0.1 to 0.2)          | 0.1<br>(0.1 to 0.2)             | 1.78 to 2.96              | 0.1<br>(0.1 to 0.4)             | 0.1<br>(0.1 to 0.4)             | -0.7 to 0.67              | 0.1<br>(0.1 to 0.2)          | 0.1<br>(0.1 to 0.2)             | 1.78 to 2.96              | 142.0<br>(99.2 to 194.4) | 136.4<br>(89.1 to 194.4) | -9.9<br>(-6.75 to 8.87) | 0.1<br>(-0.3 to 0.5) | 0.2<br>(0.1 to 0.3) | 0.1<br>(-0.2 to 0.1) | 0.1<br>(-0.2 to 0.1)            | 0.1<br>(-0.2 to 0.1) |
| GGPD trait                                        | 0.3 to 0.8                   | 0.3 to 0.8                      | 1.0 to 2.2                | 1.3<br>(0.8 to 1.9)             | 1.3<br>(0.8 to 1.9)             | 6.2<br>(-2.7 to 15.74)    | 0.3 to 0.8                   | 0.3 to 0.8                      | 1.0 to 2.2                | 142.0<br>(99.2 to 194.4) | 136.4<br>(89.1 to 194.4) | -9.9<br>(-6.75 to 8.87) | 0.1<br>(-0.3 to 0.5) | 0.2<br>(0.1 to 0.3) | 0.1<br>(-0.2 to 0.1) | 1.0 to 2.2                      | 0.6<br>(0.4 to 1.0)  |
| Other hemoglobinopathies and hemolytic anemias    | 25.0<br>(17.2 to 33.8)       | 34.9<br>(24.0 to 33.8)          | 39.9<br>(35.1 to 39.9)    | 51.3<br>(42.3 to 76.5)          | 51.3<br>(42.3 to 76.5)          | 20.7<br>(16.4 to 25.5)    | 25.0<br>(17.2 to 33.8)       | 34.9<br>(24.0 to 33.8)          | 39.9<br>(35.1 to 39.9)    | 142.0<br>(99.2 to 194.4) | 136.4<br>(89.1 to 194.4) | -9.9<br>(-6.75 to 8.87) | 0.1<br>(-0.3 to 0.5) | 0.2<br>(0.1 to 0.3) | 0.1<br>(-0.2 to 0.1) | 39.9<br>(35.1 to 39.9)          | 0.8<br>(0.6 to 1.0)  |
| Endocrine, metabolic, blood, and immune disorders | 144.8<br>(1.039 to 1.887.5)  | 1,723.6<br>(1,240.6 to 2,278.4) | 15.5 to 23.41             | 2,618.7<br>(1,882.8 to 3,515.1) | 2,618.7<br>(1,882.8 to 3,515.1) | 1.0<br>(-2.72 to 4.44)    | 144.8<br>(1.039 to 1.887.5)  | 1,723.6<br>(1,240.6 to 2,278.4) | 15.5 to 23.41             | 142.0<br>(99.2 to 194.4) | 136.4<br>(89.1 to 194.4) | -9.9<br>(-6.75 to 8.87) | 0.1<br>(-0.3 to 0.5) | 0.2<br>(0.1 to 0.3) | 0.1<br>(-0.2 to 0.1) | 15.5 to 23.41                   | 0.8<br>(0.6 to 1.0)  |
| Rheumatoid arthritis                              | 69.4<br>(50.8 to 90.3)       | 71.6<br>(51.8 to 93.8)          | 24.0<br>(1.69 to 7.02)    | 109.9<br>(79.7 to 143.2)        | 109.9<br>(79.7 to 143.2)        | 1.8<br>(-18.64 to 11.77)  | 69.4<br>(50.8 to 90.3)       | 71.6<br>(51.8 to 93.8)          | 24.0<br>(1.69 to 7.02)    | 142.0<br>(99.2 to 194.4) | 136.4<br>(89.1 to 194.4) | -9.9<br>(-6.75 to 8.87) | 0.1<br>(-0.3 to 0.5) | 0.2<br>(0.1 to 0.3) | 0.1<br>(-0.2 to 0.1) | 109.9<br>(79.7 to 143.2)        | 0.8<br>(0.6 to 1.0)  |
| Osteoarthritis                                    | 109.8<br>(72.4 to 168.1)     | 136.1<br>(92.0 to 168.1)        | 24.0<br>(10.0 to 25.4)    | 169.0<br>(107.6 to 232.6)       | 169.0<br>(107.6 to 232.6)       | 1.8<br>(-12.7 to 10.3)    | 109.8<br>(72.4 to 168.1)     | 136.1<br>(92.0 to 168.1)        | 24.0<br>(10.0 to 25.4)    | 142.0<br>(99.2 to 194.4) | 136.4<br>(89.1 to 194.4) | -9.9<br>(-6.75 to 8.87) | 0.1<br>(-0.3 to 0.5) | 0.2<br>(0.1 to 0.3) | 0.1<br>(-0.2 to 0.1) | 169.0<br>(107.6 to 232.6)       | 0.8<br>(0.6 to 1.0)  |
| Low back and neck pain                            | 1,077.7<br>(78.3 to 1,447.0) | 1,778.4<br>(892.3 to 1,778.5)   | 18.7<br>(13.8 to 23.7)    | 2,628.6<br>(1,408.5 to 2,701.9) | 2,628.6<br>(1,408.5 to 2,701.9) | 1.0<br>(-3.89 to 5.51)    | 1,077.7<br>(78.3 to 1,447.0) | 1,778.4<br>(892.3 to 1,778.5)   | 18.7<br>(13.8 to 23.7)    | 142.0<br>(99.2 to 194.4) | 136.4<br>(89.1 to 194.4) | -9.9<br>(-6.75 to 8.87) | 0.1<br>(-0.3 to 0.5) | 0.2<br>(0.1 to 0.3) | 0.1<br>(-0.2 to 0.1) | 2,628.6<br>(1,408.5 to 2,701.9) | 0.8<br>(0.6 to 1.0)  |
| Low back pain                                     | 708.1<br>(484.1 to 969.8)    | 1,286.2<br>(573.6 to 1,772.3)   | 18.7<br>(13.8 to 23.7)    | 2,028.6<br>(1,408.5 to 2,701.9) | 2,028.6<br>(1,408.5 to 2,701.9) | 1.0<br>(-3.89 to 5.51)    | 708.1<br>(484.1 to 969.8)    | 1,286.2<br>(573.6 to 1,772.3)   | 18.7<br>(13.8 to 23.7)    | 142.0<br>(99.2 to 194.4) | 136.4<br>(89.1 to 194.4) | -9.9<br>(-6.75 to 8.87) | 0.1<br>(-0.3 to 0.5) | 0.2<br>(0.1 to 0.3) | 0.1<br>(-0.2 to 0.1) | 2,028.6<br>(1,408.5 to 2,701.9) | 0.8<br>(0.6 to 1.0)  |
| Neck pain                                         | 371.1<br>(264.1 to 518.2)    | 492.2<br>(305.1 to 599.0)       | 15.0<br>(10.9 to 20.6)    | 709.3<br>(497.1 to 977.7)       | 709.3<br>(497.1 to 977.7)       | -2.1<br>(-11.95 to 9.50)  | 371.1<br>(264.1 to 518.2)    | 492.2<br>(305.1 to 599.0)       | 15.0<br>(10.9 to 20.6)    | 142.0<br>(99.2 to 194.4) | 136.4<br>(89.1 to 194.4) | -9.9<br>(-6.75 to 8.87) | 0.1<br>(-0.3 to 0.5) | 0.2<br>(0.1 to 0.3) | 0.1<br>(-0.2 to 0.1) | 709.3<br>(497.1 to 977.7)       | 0.8<br>(0.6 to 1.0)  |
| Gout                                              | 2.3 to 4.5                   | 2.9 to 5.7                      | 26.8<br>(17.4 to 36.48)   | 5.5<br>(3.8 to 7.5)             | 5.5<br>(3.8 to 7.5)             | 4.2<br>(-6.28 to 8.88)    | 2.3 to 4.5                   | 2.9 to 5.7                      | 26.8<br>(17.4 to 36.48)   | 142.0<br>(99.2 to 194.4) | 136.4<br>(89.1 to 194.4) | -9.9<br>(-6.75 to 8.87) | 0.1<br>(-0.3 to 0.5) | 0.2<br>(0.1 to 0.3) | 0.1<br>(-0.2 to 0.1) | 26.8<br>(17.4 to 36.48)         | 0.8<br>(0.6 to 1.0)  |
| Other non-musculoskeletal disorders               | 182.1<br>(120.1 to 258.6)    | 238.0<br>(156.6 to 338.0)       | 24.0<br>(24.1 to 33.72)   | 305.2<br>(214.8 to 464.3)       | 305.2<br>(214.8 to 464.3)       | 1.8<br>(-18.64 to 11.77)  | 182.1<br>(120.1 to 258.6)    | 238.0<br>(156.6 to 338.0)       | 24.0<br>(24.1 to 33.72)   | 142.0<br>(99.2 to 194.4) | 136.4<br>(89.1 to 194.4) | -9.9<br>(-6.75 to 8.87) | 0.1<br>(-0.3 to 0.5) | 0.2<br>(0.1 to 0.3) | 0.1<br>(-0.2 to 0.1) | 305.2<br>(214.8 to 464.3)       | 0.8<br>(0.6 to 1.0)  |
| Congenital anomalies                              | 88.4<br>(66.6 to 140.3)      | 1,109.0<br>(750.1 to 1,586.1)   | 12.3<br>(9.8 to 19.42)    | 599.8<br>(1,210.7 to 2,643.3)   | 599.8<br>(1,210.7 to 2,643.3)   | -5.1<br>(-7.10 to -2.93)  | 88.4<br>(66.6 to 140.3)      | 1,109.0<br>(750.1 to 1,586.1)   | 12.3<br>(9.8 to 19.42)    | 142.0<br>(99.2 to 194.4) | 136.4<br>(89.1 to 194.4) | -9.9<br>(-6.75 to 8.87) | 0.1<br>(-0.3 to 0.5) | 0.2<br>(0.1 to 0.3) | 0.1<br>(-0.2 to 0.1) | 12.3<br>(9.8 to 19.42)          | 0.8<br>(0.6 to 1.0)  |
| Neural tube defects                               | 3.4 to 6.4                   | 3.6 to 6.9                      | 8.5<br>(10.1 to 12.70)    | 11.1<br>(15.8 to 21.56)         | 11.1<br>(15.8 to 21.56)         | 2.4<br>(-3.5 to 6.48)     | 3.4 to 6.4                   | 3.6 to 6.9                      | 8.5<br>(10.1 to 12.70)    | 142.0<br>(99.2 to 194.4) | 136.4<br>(89.1 to 194.4) | -9.9<br>(-6.75 to 8.87) | 0.1<br>(-0.3 to 0.5) | 0.2<br>(0.1 to 0.3) | 0.1<br>(-0.2 to 0.1) | 8.5<br>(10.1 to 12.70)          | 0.8<br>(0.6 to 1.0)  |
| Congenital heart anomalies                        | 15.2<br>(6.5 to 26.3)        | 33.2<br>(6.6 to 27.8)           | 3.2<br>(-1.86 to 18.30)   | 32.0<br>(14.2 to 57.6)          | 32.0<br>(14.2 to 57.6)          | -3.5<br>(-11.78 to 6.10)  | 15.2<br>(6.5 to 26.3)        | 33.2<br>(6.6 to 27.8)           | 3.2<br>(-1.86 to 18.30)   | 142.0<br>(99.2 to 194.4) | 136.4<br>(89.1 to 194.4) | -9.9<br>(-6.75 to 8.87) | 0.1<br>(-0.3 to 0.5) | 0.2<br>(0.1 to 0.3) | 0.1<br>(-0.2 to 0.1) | 33.2<br>(6.6 to 27.8)           | 0.8<br>(0.6 to 1.0)  |
| Cleft lip and palate                              | 0.1<br>(0.1 to 0.1)          | 0.1<br>(0.1 to 0.1)             | 0.1<br>(-1.38 to 1.06)    | 0.1<br>(0.1 to 0.5)             | 0.1<br>(0.1 to 0.5)             | 0.1<br>(-1.38 to 1.06)    | 0.1<br>(0.1 to 0.1)          | 0.1<br>(0.1 to 0.1)             | 0.1<br>(-1.38 to 1.06)    | 142.0<br>(99.2 to 194.4) | 136.4<br>(89.1 to 194.4) | -9.9<br>(-6.75 to 8.87) | 0.1<br>(-0.3 to 0.5) | 0.2<br>(0.1 to 0.3) | 0.1<br>(-0.2 to 0.1) | 0.1<br>(-0.2 to 0.1)            | 0.1<br>(-0.2 to 0.1) |
| Down syndrome                                     | 7.5<br>(-0.05 to 15.9)       | 12.8<br>(9.1 to 16.2)           | 29.5<br>(14.5 to 44.8)    | 19.1<br>(13.2 to 26.5)          | 19.1<br>(13.2 to 26.5)          | 8.1<br>(-6.2 to 8.1)      | 7.5<br>(-0.05 to 15.9)       | 12.8<br>(9.1 to 16.2)           | 29.5<br>(14.5 to 44.8)    | 142.0<br>(99.2 to 194.4) | 136.4<br>(89.1 to 194.4) | -9.9<br>(-6.75 to 8.87) | 0.1<br>(-0.3 to 0.5) | 0.2<br>(0.1 to 0.3) | 0.1<br>(-0.2 to 0.1) | 29.5<br>(14.5 to 44.8)          | 0.8<br>(0.6 to 1.0)  |
| Turner syndrome                                   | -0.05<br>(0.0 to 0.1)        | -0.05<br>(0.0 to 0.1)           | 0.1<br>(-0.97 to 34.99)   | 3.9<br>(0.0 to 0.1)             | 3.9<br>(0.0 to 0.1)             | -0.05<br>(-9.99 to 22.54) | -0.05<br>(0.0 to 0.1)        | -0.05<br>(0.0 to 0.1)           | 0.1<br>(-0.97 to 34.99)   | 142.0<br>(99.2 to 194.4  |                          |                         |                      |                     |                      |                                 |                      |

|  |                  |                  |                    |                    |                  |                    |                  |                   |                    |                  |                  |                      |                   |                   |                    |                  |                  |
|--|------------------|------------------|--------------------|--------------------|------------------|--------------------|------------------|-------------------|--------------------|------------------|------------------|----------------------|-------------------|-------------------|--------------------|------------------|------------------|
|  | 0.4              | 0.4              | 3.0                | 1.2                | 1.2              | 0.6                | 0.2              | 0.2               | 3.5                | 1.2              | 1.2              | -0.0                 | 0.2               | 0.2               | 2.3                | 1.1              | 1.1              |
|  | (0.2 to 0.8)     | (0.2 to 0.8)     | (1.79 to 7.50)     | (0.1 to 2.3)       | (0.1 to 2.3)     | (5.14 to 3.89)     | (0.1 to 0.2)     | (0.1 to 0.2)      | (2.21 to 10.26)    | (0.6 to 2.4)     | (0.6 to 2.4)     | (-0.23 to 0.45)      | (0.1 to 0.4)      | (0.1 to 0.4)      | (-4.37 to 0.45)    | (0.5 to 1.2)     | (0.5 to 1.2)     |
|  | 10.6             | 12.0             | 13.4               | 22.1               | 22.4             | 1.4                | 6.0              | 15.3              | 22.2               | 22.7             | 5.4              | 1.3                  | 6.0               | 6.0               | 11.7               | 22.0             | 22.2             |
|  | (4.8 to 20.3)    | (5.0 to 22.9)    | (8.19 to 18.43)    | (10.1 to 42.5)     | (10.2 to 42.8)   | (-3.21 to 5.77)    | (2.4 to 10.1)    | (2.8 to 11.5)     | (4.22 to 23.99)    | (10.0 to 43.0)   | (10.4 to 43.5)   | (7.13 to 10.02)      | (2.5 to 10.4)     | (2.7 to 11.6)     | (5.00 to 21.40)    | (10.1 to 42.8)   | (10.0 to 43.3)   |
|  | 29.4             | 29.8             | 26.5               | 56.3               | 56.3             | 2.3                | 17.6             | 21.1              | 25.7               | 26.8             | 6.1              | 0.4                  | 15.8              | 15.2              | 17.8               | 40.9             | 40.9             |
|  | (12.6 to 64.1)   | (15.7 to 81.8)   | (19.54 to 35.85)   | (22.5 to 115.1)    | (23.1 to 120.0)  | (-2.35 to 10.65)   | (7.0 to 36.2)    | (8.8 to 46.0)     | (15.09 to 38.88)   | (26.4 to 137.3)  | (26.6 to 139.0)  | (-7.85 to 10.69)     | (5.6 to 28.1)     | (5.6 to 28.2)     | (18.28 to 38.44)   | (19.0 to 95.6)   | (19.0 to 95.2)   |
|  | 105.3            | 109.1            | 158.5              | 137.7              | 137.6            | -18.9              | 41.3             | 46.5              | 146.6              | 146.6            | 121.8            | -16.9                | 64.0              | 62.6              | 62.6               | 168.6            | 168.6            |
|  | (71.6 to 183.6)  | (74.6 to 190.0)  | (-1.75 to 9.42)    | (108.4 to 216.7)   | (90.1 to 181.5)  | (-21.28 to -12.33) | (27.6 to 96.8)   | (31.5 to 64.1)    | (5.30 to 20.80)    | (98.1 to 201.5)  | (82.4 to 168.3)  | (-42.32 to -11.03)   | (43.3 to 87.7)    | (42.7 to 86.4)    | (-8.36 to -10.02)  | (114.6 to 231.9) | (99.8 to 194.8)  |
|  | 26.2             | 26.2             | 49.3               | 51.3               | 51.3             | 0.2                | 29.3             | 32.0              | 44.4               | 44.4             | 11.0             | 0.7                  | 21.7              | 21.7              | 21.7               | 58.9             | 58.9             |
|  | (16.6 to 38.7)   | (18.8 to 44.5)   | (10.84 to 17.16)   | (32.7 to 76.0)     | (32.7 to 76.0)   | (-2.66 to 2.99)    | (8.1 to 18.8)    | (8.1 to 18.8)     | (10.92 to 19.80)   | (28.5 to 66.3)   | (28.5 to 66.3)   | (-1.91 to 13.08)     | (9.6 to 25.5)     | (10.8 to 25.6)    | (9.12 to 17.08)    | (17.1 to 88.1)   | (17.1 to 88.1)   |
|  | 551.7            | 442.1            | 200.0              | 308.2              | 291.7            | 243.5              | 245.0            | 130.0             | 1,091.1            | 1,091.1          | 270.0            | 196.6                | 270.0             | 196.6             | 27.3               | 695.3            | 640.9            |
|  | (422.5 to 706.4) | (319.0 to 593.2) | (-28.53 to 11.16)  | (691.4 to 1,109.4) | (424.6 to 799.4) | (-41.00 to 28.21)  | (177.7 to 361.0) | (207.7 to 314.15) | (831.1 to 1,595.2) | (531.4 to 984.5) | (531.4 to 984.5) | (-38.74 to 1,159.73) | (200.7 to 363.42) | (38.76 to 712.22) | (-53.8 to 897.7)   | (131.1 to 996.7) | (44.30 to 28.80) |
|  | 80.7             | 59.4             | 48.5               | 31.5               | 31.5             | 150.4              | 48.5             | 31.5              | 229.7              | 97.8             | 22.0             | -56.7                | 26.9              | 26.9              | 46.7               | 26.9             | 46.7             |
|  | (60.3 to 103.4)  | (29.0 to 54.2)   | (-54.51 to -43.75) | (116.5 to 192.6)   | (44.7 to 81.4)   | (-63.41 to -54.43) | (41.1 to 69.7)   | (41.1 to 69.7)    | (52.05 to 40.78)   | (17.8 to 294.2)  | (71.1 to 129.7)  | (-61.69 to -52.74)   | (18.6 to 28.2)    | (6.9 to 32.7)     | (-41.35 to -11.65) | (5.7 to 96.7)    | (1.9 to 35.9)    |
|  | 74.8             | 74.8             | 140.0              | 140.0              | 140.0            | 40.0               | 40.0             | 40.0              | 215.0              | 215.0            | 40.0             | -40.8                | 40.0              | 40.0              | 40.0               | 140.0            | 140.0            |
|  | (56.3 to 95.8)   | (23.4 to 42.8)   | (35.6 to 178.9)    | (116.0 to 178.9)   | (35.6 to 81.6)   | (-68.57 to -61.00) | (40.9 to 69.7)   | (40.9 to 69.7)    | (58.40 to 49.95)   | (160.6 to 273.3) | (56.3 to 102.2)  | (-67.39 to -57.75)   | (15.4 to 26.0)    | (5.6 to 10.3)     | (-64.00 to -57.75) | (52.9 to 90.1)   | (19.7 to 29.2)   |
|  | 15.2             | 5.7              | 40.7               | 28.1               | 28.1             | 8.5                | 10.4             | 4.2               | 64.0               | 41.1             | 11.1             | 48.1                 | 1.8               | 1.5               | 46.7               | 16.1             | 74.1             |
|  | (11.4 to 19.8)   | (4.0 to 7.8)     | (-6.6 to 18.59)    | (21.0 to 36.5)     | (6.1 to 11.7)    | (-72.85 to 46.10)  | (7.8 to 13.6)    | (0.0 to 5.7)      | (30.8 to 54.4)     | (0.3 to 17.8)    | (71.44 to 64.61) | (-3.6 to 32.8)       | (1.6 to 6.2)      | (1.1 to 10.2)     | (-71.98 to 45.16)  | (12.1 to 21.0)   | (3.0 to 1.7)     |
|  | 7.4              | 14.2             | 43.6               | 61.3               | 61.3             | 2.7                | 4.6              | 2.1               | 68.5               | 6.8              | 2.0              | -68.5                | 1.9               | 2.0               | 73.3               | 1.9              | 73.3             |
|  | (5.6 to 9.5)     | (1.9 to 3.6)     | (-68.17 to -58.36) | (10.7 to 18.2)     | (3.1 to 5.7)     | (-73.32 to 45.14)  | (4.1 to 6.9)     | (1.5 to 2.7)      | (-66.49 to 56.27)  | (16.4 to 27.7)   | (4.9 to 9.0)     | (-72.32 to 64.03)    | (1.5 to 2.5)      | (0.4 to 0.8)      | (-41.35 to -11.65) | (5.4 to 9.3)     | (1.4 to 2.6)     |
|  | 54.1             | 53.7             | 59.4               | 26.9               | 26.9             | 4.9                | 43.2             | 12.3              | 48.3               | 14.9             | 5.4              | 48.1                 | 1.8               | 0.4               | 49.1               | 1.1              | 49.1             |
|  | (10.5 to 18.0)   | (4.1 to 7.8)     | (-9.2 to 11.5)     | (20.1 to 34.3)     | (5.2 to 11.5)    | (-71.66 to -61.82) | (8.8 to 7.3)     | (-3.1 to 2.8)     | (-62.41 to 49.86)  | (36.1 to 61.8)   | (12.1 to 22.8)   | (-69.77 to 59.85)    | (1.3 to 2.3)      | (0.3 to 0.5)      | (-42.90 to 74.31)  | (4.8 to 8.4)     | (0.8 to 1.5)     |
|  | 37.6             | 18.0             | -52.2              | 69.9               | 27.1             | -61.3              | 26.0             | 12.8              | 59.6               | 40.3             | 5.2              | -59.8                | 11.6              | 40.0              | 44.5               | 40.0             | 68.8             |
|  | (28.5 to 47.9)   | (13.2 to 23.4)   | (-56.47 to 47.66)  | (52.8 to 89.9)     | (20.0 to 35.5)   | (-64.77 to 37.45)  | (15.7 to 33.0)   | (9.4 to 16.9)     | (-54.93 to 45.59)  | (77.0 to 128.9)  | (23.8 to 52.7)   | (-63.70 to 56.69)    | (8.8 to 14.8)     | (3.8 to 6.8)      | (-60.11 to 51.03)  | (30.3 to 50.8)   | (10.7 to 29.1)   |
|  | 5.5              | 8.8              | 46.0               | 10.5               | 12.5             | 15.0               | 4.2              | 6.7               | 58.2               | 20.5             | 26.1             | 1.6                  | 1.8               | 5.1               | 4.9                | 4.0              | 40.0             |
|  | (0.4 to 0.6)     | (0.1 to 0.2)     | (-72.69 to -64.85) | (0.7 to 1.1)       | (0.2 to 0.3)     | (-77.79 to 71.16)  | (0.2 to 0.3)     | (0.0 to 0.1)      | (-78.75 to 72.69)  | (0.8 to 1.3)     | (0.1 to 0.3)     | (-82.91 to 77.94)    | (0.2 to 0.3)      | (0.1 to 0.1)      | (-65.47 to 55.12)  | (0.6 to 1.0)     | (0.2 to 0.3)     |
|  | 44.4             | 39.6             | 11.1               | 86.7               | 64.9             | -25.3              | 38.1             | 31.2              | 152.7              | 104.3            | -18.1            | 152.7                | 0.4               | 24.0              | 31.0               | 11.0             | 11.0             |
|  | (33.1 to 55.8)   | (28.2 to 53.8)   | (-1.73 to 4.38)    | (64.9 to 114.0)    | (46.6 to 89.7)   | (-30.76 to 19.60)  | (28.3 to 50.5)   | (22.3 to 42.4)    | (-24.31 to 12.23)  | (113.9 to 201.2) | (73.9 to 141.4)  | (-38.78 to 136.84)   | (4.8 to 8.4)      | (5.9 to 11.5)     | (-25.51 to 43.13)  | (18.1 to 31.3)   | (19.2 to 36.3)   |
|  | 0.5              | 0.3              | 44.7               | 0.4                | 0.5              | -44.7              | 0.4              | 0.2               | 47.1               | 1.4              | 0.4              | -54.9                | 0.1               | 0.1               | 40.5               | 0.4              | 40.5             |
|  | (0.4 to 0.6)     | (0.2 to 0.4)     | (-41.50 to 28.92)  | (0.4 to 1.2)       | (0.4 to 0.7)     | (-49.98 to 39.02)  | (0.3 to 0.5)     | (0.1 to 0.3)      | (-52.38 to 41.37)  | (1.1 to 1.8)     | (0.5 to 0.7)     | (-59.41 to 49.98)    | (0.1 to 0.1)      | (0.1 to 0.1)      | (-45.50 to 14.96)  | (0.3 to 0.5)     | (0.3 to 0.5)     |
|  | 0.4              | 0.8              | 100.3              | 0.9                | 1.9              | 62.7               | 0.5              | 0.5               | 42.9               | 1.0              | 0.2              | 42.7                 | 0.4               | 0.6               | 115.6              | 0.6              | 115.6            |
|  | (0.3 to 0.6)     | (0.6 to 1.1)     | (81.85 to 118.00)  | (0.6 to 1.1)       | (1.0 to 1.8)     | (-84.44 to 78.44)  | (0.2 to 0.3)     | (0.4 to 0.6)      | (-73.45 to 111.41) | (0.8 to 1.3)     | (1.2 to 2.1)     | (-41.14 to 71.48)    | (0.3 to 0.2)      | (0.3 to 0.5)      | (-90.89 to 130.67) | (0.5 to 0.8)     | (0.8 to 1.5)     |
|  | 43.6             | 38.5             | -11.9              | 85.0               | 63.0             | -25.9              | 37.5             | 30.6              | 102.0              | 7.9              | -82.2            | 29.3                 | 7.9               | 25.3              | 49.3               | 9.6              | 9.6              |
|  | (32.5 to 57.8)   | (27.0 to 52.3)   | (-18.22 to 15.24)  | (63.6 to 111.8)    | (45.2 to 85.3)   | (-31.23 to 20.25)  | (27.9 to 49.7)   | (21.8 to 41.5)    | (-24.65 to 12.70)  | (112.1 to 158.0) | (72.2 to 138.5)  | (-37.16 to 21.20)    | (4.6 to 8.0)      | (5.6 to 10.8)     | (-17.79 to 41.62)  | (17.3 to 30.1)   | (18.2 to 34.4)   |
|  | 2.7              | 3.3              | 19.7               | 4.7                | 4.7              | -0.1               | 1.3              | 1.6               | 26.1               | 4.8              | 0.7              | -26.1                | 1.5               | 1.7               | 14.3               | 1.7              | 14.3             |
|  | (1.7 to 4.0)     | (2.1 to 4.8)     | (-15.38 to 24.15)  | (3.0 to 7.0)       | (3.0 to 7.0)     | (-3.45 to 3.42)    | (0.8 to 1.8)     | (1.0 to 2.3)      | (-20.33 to 32.65)  | (3.0 to 7.0)     | (3.0 to 7.1)     | (-4.36 to 4.70)      | (0.9 to 2.2)      | (1.1 to 2.5)      | (-0.04 to 19.70)   | (3.0 to 7.0)     | (3.0 to 6.9)     |
|  | 1.9              | 2.4              | 30.5               | 2.8                | 2.8              | 8.0                | 1.9              | 1.9               | 28.1               | 4.9              | 1.1              | -24.4                | 1.1               | 1.1               | 22.4               | 3.4              | 4.6              |
|  | (1.4 to 2.5)     | (1.7 to 3.4)     | (-22.39 to 14.66)  | (2.6 to 4.7)       | (2.7 to 5.3)     | (-2.7 to 1.3)      | (0.7 to 1.3)     | (0.7 to 1.3)      | (-28.70 to 47.80)  | (2.9 to 5.2)     | (3.0 to 5.9)     | (-34.9 to 18.84)     | (0.6 to 1.6)      | (0.8 to 1.6)      | (-14.41 to 30.70)  | (2.3 to 4.4)     | (2.4 to 4.8)     |
|  | 0.3              | 0.3              | 24.2               | 0.5                | 0.5              | 6.5                | 0.2              | 0.2               | 29.5               | 0.6              | 0.6              | 8.4                  | 0.1               | 0.1               | 18.8               | 0.5              | 4.3              |
|  | (0.2 to 0.4)     | (0.2 to 0.5)     | (-15.77 to 32.71)  | (0.4 to 0.7)       | (0.4 to 0.8)     | (-6.93 to 13.94)   | (0.1 to 0.2)     | (0.1 to 0.2)      | (-18.39 to 40.65)  | (0.4 to 0.8)     | (0.5 to 0.8)     | (-14.10 to 18.26)    | (0.1 to 0.2)      | (0.1 to 0.2)      | (-7.13 to 39.46)   | (0.4 to 0.7)     | (0.4 to 0.7)     |
|  | 1.4              | 2.1              | 31.6               | 3.0                | 3.0              | 8.3                | 0.8              | 1.1               | 29.9               | 1.3              | 0.8              | -11.4                | 0.9               | 0.9               | 23.0               | 2.8              | 4.7              |
|  | (1.1 to 2.1)     | (1.4 to 2.9)     | (-22.91 to 39.99)  | (2.2 to 4.1)       | (2.3 to 4.6)     | (-1.00 to 15.37)   | (0.6 to 1.1)     | (0.8 to 1.6)      | (-29.39 to 50.05)  | (1.2 to 4.4)     | (2.6 to 5.2)     | (-11.11 to 20.01)    | (0.5 to 1.0)      | (0.6 to 1.3)      | (-14.66 to 32.28)  | (1.9 to 3.7)     | (2.9 to 12.78)   |
|  | 2.7              | 2.8              | 44.8               | 3.3                | 3.3              | -18.6              | 1.8              | 1.8               | 64.4               | 2.2              | 0.8              | -64.4                | 1.8               | 1.8               | 12.3               | 2.8              | 24.1             |
|  | (1.9 to 3.7)     | (1.7 to 3.7)     | (-12.36 to 3.35)   | (3.7 to 7.3)       | (2.7 to 6.3)     | (-26.88 to -11.08) | (1.2 to 2.5)     | (1.2 to 2.5)      | (-7.93 to 7.52)    | (4.9 to 10.0)    | (3.8 to 8.7)     | (-24.07 to 9.01)     | (0.7 to 1.3)      | (0.5 to 1.2)      | (-21.27 to 3.30)   | (2.5 to 4.8)     | (1.7 to 3.9)     |
|  | 0.5              | 0.4              | -24.5              | 0.3                | 0.3              | -24.5              | 0.3              | 0.3               | -24.5              | 0.3              | 0.3              | -24.5                | 0.1               | 0.1               | -12.4              | 0.5              | 23.1             |
|  | (0.4 to 0.6)     | (0.3 to 0.5)     | (-14.44 to 1.42)   | (0.7 to 1.1)       | (0.5 to 0.8)     | (-31.03 to -17.53) | (0.2 to 0.4)     | (0.2 to 0.4)      | (-32.98 to 4.11)   | (1.0 to 1.6)     | (0.8 to 1.2)     | (-30.65 to -15.92)   | (0.1 to 0.2)      | (0.1 to 0.2)      | (-20.95 to -2.73)  | (0.4 to 0.6)     | (0.3 to 0.4)     |
|  | 0.4              | 0.4              | -1.6               | 0.8                | 0.7              | -16.9              | 0.2              | 0.2               | 16.8               | 0.7              | 0.7              | -16.8                | 0.6               | 0.6               | 0.5                | 0.5              | 16.6             |
|  | (0.2 to 0.6)     | (0.2 to 0.6)     | (-9.89 to 4.75)    | (0.5 to 1.2)       | (0.5 to 1.2)     | (-20.87 to -6.49)  | (0.1 to 0.4)     | (0.1 to 0.4)      | (-5.27 to 8.16)    | (0.6 to 1.5)     | (0.5 to 1.4)     | (-18.78 to 4.87)     | (0.1 to 0.2)      | (0.1 to 0.2)      | (-17.91 to 1.10)   | (0.3 to 0.9)     | (-2.46 to 7.96)  |
|  | 1.9              | 1.8              | 21.6               | 3.6                | 3.6              | -34.4              | 1.2              | 1.2               | 41.1               | 2.2              | 0.7              | -41.1                | 1.1               | 1.1               | 2.4                | 2.4              | 25.0             |
|  | (1.3 to 2.6)     | (1.1 to 2.6)     | (-14.63 to 4.75)   | (2.4 to 5.2)       | (1.8 to 4.5)     | (-27.85 to 9.62)   | (0.8 to 1.7)     | (0.7 to 1.8)      | (-9.58 to 19.95)   | (3.2 to 7.0)     | (2.5 to 6.3)     | (-24.85 to 4.57)     | (0.5 to 0.9)      | (0.4 to 0.8)      | (-24.14 to 2.43)   | (1.7 to 3.4)     | (1.1 to 2.7)     |
|  | 15.1             | 17.0             | -32.2              | 11.1               | 11.1             | -34.3              | 30.7             | 30.7              | 28.0               | 30.7             | 20.7             | -28.0                | 12.4              | 20.7              | 40.3               | 20.7             | 40.3             |
|  | (17.9 to 34.0)   | (12.0 to 23.5)   | (-36.48 to 28.11)  | (28.9 to 54.7)     | (14.9 to 29.4)   | (-51.03 to 44.39)  | (12.0 to 22.9)   | (7.8 to 15.4)     | (-38.91 to 28.81)  | (45.1 to 86.0)   | (21.6 to 42.6)   | (-54.84 to 47.43)    | (5.9 to 11.1)     | (4.2 to 8.2)      | (-33.49 to 21.68)  | (15.0 to 28.0)   | (8.8 to 17.1)    |
|  | 4.9              | 4.1              | -30.9              | 6.1                | 6.1              | -45.5              | 4.1              | 4.1               | 27.1               | 10.5             | 1.6              | -40.8                | 1.0               | 1.0               | 40.8               | 5.7              | 50.1             |
|  | (4.4 to 7.6)     | (2.9 to 5.5)     | (-47.65 to 39.09)  | (4.4 to 8.2)       | (2.2 to 4.2)     | (-51.32 to 21.3)   | (3.2 to 5.2)     | (3.2 to 5.2)      | (-31.76 to 21.98)  | (12.3 to 21.3)   | (6.9 to 12.9)    | (-45                 |                   |                   |                    |                  |                  |



Web Table 7. DALYs in England in 1990 and 2013 for all ages and age-standardized rates (per 100,000) by sex with 95% UI and percentage change. Percent changes in bold denote a statistically significant change.

| Cause                                                                   | Both sexes combined                |                                    |                           |                                     |                                 |                           |                                 |                                 |                           |                                     |                                 |                           | Males                           |                                 |                           |                                     |                                 |                           | Females |  |  |  |  |  |
|-------------------------------------------------------------------------|------------------------------------|------------------------------------|---------------------------|-------------------------------------|---------------------------------|---------------------------|---------------------------------|---------------------------------|---------------------------|-------------------------------------|---------------------------------|---------------------------|---------------------------------|---------------------------------|---------------------------|-------------------------------------|---------------------------------|---------------------------|---------|--|--|--|--|--|
|                                                                         | DALYs (in thousands)               |                                    |                           | Age-standardized rate (per 100,000) |                                 |                           | DALYs (in thousands)            |                                 |                           | Age-standardized rate (per 100,000) |                                 |                           | DALYs (in thousands)            |                                 |                           | Age-standardized rate (per 100,000) |                                 |                           |         |  |  |  |  |  |
|                                                                         | 1990                               | 2013                               | % change                  | 1990                                | 2013                            | % change                  | 1990                            | 2013                            | % change                  | 1990                                | 2013                            | % change                  | 1990                            | 2013                            | % change                  | 1990                                | 2013                            | % change                  |         |  |  |  |  |  |
| <b>All causes</b>                                                       | 15,099.8<br>(13,546.5 to 16,639.5) | 16,688.7<br>(13,865.3 to 19,575.8) | 11.2<br>(-1.2 to 24.3)    | 26,084<br>(22,111 to 29,949.4)      | 29,793<br>(25,012 to 34,600.8)  | 11.3<br>(-2.7 to 25.0)    | 29,862<br>(25,081 to 34,643)    | 33,133<br>(28,352 to 37,914)    | 11.1<br>(-2.9 to 25.0)    | 29,862<br>(25,081 to 34,643)        | 33,133<br>(28,352 to 37,914)    | 11.1<br>(-2.9 to 25.0)    | 21,994<br>(18,612 to 25,378)    | 23,994<br>(20,610 to 27,378)    | 10.9<br>(-1.3 to 23.1)    | 23,994<br>(20,610 to 27,378)        | 27,715<br>(24,326 to 31,104)    | 11.7<br>(-0.7 to 23.1)    |         |  |  |  |  |  |
| <b>Communicable, maternal, neonatal, and nutritional diseases</b>       | 933.1<br>(841.7 to 1,054.7)        | 785.9<br>(692.9 to 905.1)          | -15.9<br>(-23.7 to -8.4)  | 1,488.8<br>(1,178.2 to 2,243.2)     | 1,368.5<br>(1,227.2 to 1,687.2) | -8.1<br>(-15.3 to 1.2)    | 2,111.7<br>(1,774.0 to 2,454.3) | 1,966.6<br>(1,620.9 to 2,312.3) | -7.3<br>(-13.6 to -1.0)   | 2,111.7<br>(1,774.0 to 2,454.3)     | 1,966.6<br>(1,620.9 to 2,312.3) | -7.3<br>(-13.6 to -1.0)   | 2,111.7<br>(1,774.0 to 2,454.3) | 1,966.6<br>(1,620.9 to 2,312.3) | -7.3<br>(-13.6 to -1.0)   | 2,111.7<br>(1,774.0 to 2,454.3)     | 1,966.6<br>(1,620.9 to 2,312.3) | -7.3<br>(-13.6 to -1.0)   |         |  |  |  |  |  |
| <b>HIV/AIDS and tuberculosis</b>                                        | 12.2<br>(7.5 to 15.0)              | 0.5<br>(0.1 to 0.9)                | -23.0<br>(-27.7 to -18.3) | 23<br>(17.1 to 24.6)                | 0.9<br>(0.4 to 1.4)             | -25.7<br>(-31.9 to -19.5) | 41.3<br>(27.7 to 40.4)          | 2.5<br>(1.5 to 3.5)             | -3.8<br>(-6.4 to -1.2)    | 41.3<br>(27.7 to 40.4)              | 2.5<br>(1.5 to 3.5)             | -3.8<br>(-6.4 to -1.2)    | 41.3<br>(27.7 to 40.4)          | 2.5<br>(1.5 to 3.5)             | -3.8<br>(-6.4 to -1.2)    | 41.3<br>(27.7 to 40.4)              | 2.5<br>(1.5 to 3.5)             | -3.8<br>(-6.4 to -1.2)    |         |  |  |  |  |  |
| <b>Diarrhoeal diseases</b>                                              | 432.2<br>(404.5 to 523.2)          | 373.3<br>(329.4 to 424.0)          | -13.9<br>(-25.9 to -7.0)  | 708.8<br>(661.0 to 842.8)           | 468.9<br>(427.0 to 521.8)       | -33.7<br>(-47.1 to -27.7) | 1,058.8<br>(959.9 to 1,157.7)   | 658.8<br>(599.9 to 717.7)       | -38.0<br>(-51.4 to -24.6) | 1,058.8<br>(959.9 to 1,157.7)       | 658.8<br>(599.9 to 717.7)       | -38.0<br>(-51.4 to -24.6) | 1,058.8<br>(959.9 to 1,157.7)   | 658.8<br>(599.9 to 717.7)       | -38.0<br>(-51.4 to -24.6) | 1,058.8<br>(959.9 to 1,157.7)       | 658.8<br>(599.9 to 717.7)       | -38.0<br>(-51.4 to -24.6) |         |  |  |  |  |  |
| <b>Intestinal infectious diseases</b>                                   | 3.3<br>(1.4 to 7.0)                | 3.7<br>(1.3 to 7.9)                | 15.2<br>(-16.3 to 37.4)   | 8.3<br>(3.5 to 17.6)                | 20.7<br>(8.1 to 34.4)           | 149.3<br>(-12.1 to 272.7) | 2.7<br>(0.7 to 4.7)             | 9.9<br>(3.1 to 16.7)            | 260.0<br>(-18.5 to 478.5) | 2.7<br>(0.7 to 4.7)                 | 9.9<br>(3.1 to 16.7)            | 260.0<br>(-18.5 to 478.5) | 2.7<br>(0.7 to 4.7)             | 9.9<br>(3.1 to 16.7)            | 260.0<br>(-18.5 to 478.5) | 2.7<br>(0.7 to 4.7)                 | 9.9<br>(3.1 to 16.7)            | 260.0<br>(-18.5 to 478.5) |         |  |  |  |  |  |
| <b>Lower respiratory infections</b>                                     | 307.9<br>(346.1 to 458.8)          | 304.1<br>(276.3 to 354.9)          | -0.9<br>(-28.7 to -9.7)   | 961.3<br>(874.9 to 1,048.2)         | 961.3<br>(874.9 to 1,048.2)     | 0.0<br>(-31.1 to 32.7)    | 1,671.1<br>(1,541.2 to 1,791.0) | 1,671.1<br>(1,541.2 to 1,791.0) | 0.0<br>(-31.1 to 32.7)    | 1,671.1<br>(1,541.2 to 1,791.0)     | 1,671.1<br>(1,541.2 to 1,791.0) | 0.0<br>(-31.1 to 32.7)    | 1,671.1<br>(1,541.2 to 1,791.0) | 1,671.1<br>(1,541.2 to 1,791.0) | 0.0<br>(-31.1 to 32.7)    | 1,671.1<br>(1,541.2 to 1,791.0)     | 1,671.1<br>(1,541.2 to 1,791.0) | 0.0<br>(-31.1 to 32.7)    |         |  |  |  |  |  |
| <b>Other communicable, maternal, neonatal, and nutritional diseases</b> | 15,099.8<br>(13,546.5 to 16,639.5) | 16,688.7<br>(13,865.3 to 19,575.8) | 11.2<br>(-1.2 to 24.3)    | 26,084<br>(22,111 to 29,949.4)      | 29,793<br>(25,012 to 34,600.8)  | 11.3<br>(-2.7 to 25.0)    | 29,862<br>(25,081 to 34,643)    | 33,133<br>(28,352 to 37,914)    | 11.1<br>(-2.9 to 25.0)    | 29,862<br>(25,081 to 34,643)        | 33,133<br>(28,352 to 37,914)    | 11.1<br>(-2.9 to 25.0)    | 21,994<br>(18,612 to 25,378)    | 23,994<br>(20,610 to 27,378)    | 10.9<br>(-1.3 to 23.1)    | 23,994<br>(20,610 to 27,378)        | 27,715<br>(24,326 to 31,104)    | 11.7<br>(-0.7 to 23.1)    |         |  |  |  |  |  |
| <b>Other communicable, maternal, neonatal, and nutritional diseases</b> | 15,099.8<br>(13,546.5 to 16,639.5) | 16,688.7<br>(13,865.3 to 19,575.8) | 11.2<br>(-1.2 to 24.3)    | 26,084<br>(22,111 to 29,949.4)      | 29,793<br>(25,012 to 34,600.8)  | 11.3<br>(-2.7 to 25.0)    | 29,862<br>(25,081 to 34,643)    | 33,133<br>(28,352 to 37,914)    | 11.1<br>(-2.9 to 25.0)    | 29,862<br>(25,081 to 34,643)        | 33,133<br>(28,352 to 37,914)    | 11.1<br>(-2.9 to 25.0)    | 21,994<br>(18,612 to 25,378)    | 23,994<br>(20,610 to 27,378)    | 10.9<br>(-1.3 to 23.1)    | 23,994<br>(20,610 to 27,378)        | 27,715<br>(24,326 to 31,104)    | 11.7<br>(-0.7 to 23.1)    |         |  |  |  |  |  |



|                                     |                        |                      |                        |                        |                     |                      |                      |                      |                    |                        |                        |                     |                      |                      |                     |                        |                        |                     |                     |
|-------------------------------------|------------------------|----------------------|------------------------|------------------------|---------------------|----------------------|----------------------|----------------------|--------------------|------------------------|------------------------|---------------------|----------------------|----------------------|---------------------|------------------------|------------------------|---------------------|---------------------|
| Chlamydial infection                | 2.8                    | 2.9                  | 4.6                    | 5.8                    | 5.8                 | 0.3                  | 2.1                  | 2.2                  | 7.2                | 8.6                    | 8.8                    | 7.2                 | 0.7                  | 0.7                  | 2.8                 | 2.9                    | 2.7                    | 2.5                 |                     |
| (1.6 to 4.9)                        | (1.6 to 5.1)           | (6.92 to 8.71)       | (8.1 to 13)            | (8.1 to 13)            | (11.02 to 13.76)    | (1.2 to 1.5)         | (1.2 to 1.8)         | (1.2 to 1.8)         | (7.30 to 7.27)     | (8.9 to 8.69)          | (8.8 to 8.53)          | (12.0 to 12.12)     | (0.4 to 0.7)         | (0.3 to 1.3)         | (2.11 to 12.91)     | (1.9 to 6)             | (1.3 to 3.7)           | (7.5 to 48.15)      |                     |
| Gonococcal infection                | 0.4                    | 0.7                  | 7.4                    | 1.6                    | 1.5                 | -10.0                | 0.4                  | 0.4                  | 7.6                | 1.8                    | 1.6                    | -1.8                | 0.4                  | 0.4                  | 4.6                 | 1.4                    | 7.3                    | 1.4                 |                     |
| (0.5 to 1)                          | (0.4 to 1.2)           | (-18.17 to 2.72)     | (1.0 to 2)             | (1.0 to 2)             | (2.08 to 0.25)      | (-21.01 to 1.03)     | (0.3 to 0.7)         | (0.2 to 0.6)         | (0.2 to 0.6)       | (1.1 to 2.9)           | (0.9 to 2.6)           | (-23.37 to 1.48)    | (0.2 to 0.6)         | (0.2 to 0.6)         | (0.9 to 2.6)        | (0.7 to 2.6)           | (-24.21 to 12.73)      | (0.2 to 4.18)       |                     |
| Trichomoniasis                      | 0.2                    | 0.2                  | 0.2                    | 0.2                    | 0.2                 | 0.2                  | 0.2                  | 0.2                  | 0.2                | 0.2                    | 0.2                    | 0.2                 | 0.2                  | 0.2                  | 0.2                 | 0.2                    | 0.2                    | 0.2                 |                     |
| (0.1 to 0.5)                        | (0.1 to 0.6)           | (-9.77 to 34.02)     | (0.2 to 1)             | (0.2 to 1)             | (-15.58 to 27.40)   | --                   | --                   | --                   | --                 | --                     | --                     | --                  | (0.1 to 0.5)         | (0.1 to 0.6)         | (0.4 to 2)          | (0.4 to 2)             | (-0.4 to 2.2)          | (-15.64 to 27.63)   |                     |
| Genital herpes                      | 1.6                    | 1.8                  | 11.0                   | 2.9                    | 2.8                 | 0.6                  | 0.6                  | 0.7                  | 14.9               | 2.3                    | 2.2                    | 4.2                 | 1.1                  | 1.1                  | 8.8                 | 3.5                    | 4.6                    | 3.5                 |                     |
| (0.5 to 3.8)                        | (0.5 to 4.3)           | (8.83 to 18.22)      | (0.9 to 7.1)           | (0.9 to 6.8)           | (-10.79 to 1.36)    | (0.2 to 1.5)         | (0.2 to 1.5)         | (0.2 to 1.7)         | (2.48 to 26.11)    | (0.7 to 5.7)           | (0.7 to 5.8)           | (-4.27 to 4.76)     | (0.3 to 2.4)         | (0.3 to 2.6)         | (-0.12 to 16.83)    | (1.1 to 8.4)           | (1.0 to 8.2)           | (-12.21 to 27.63)   |                     |
| Other sexually transmitted diseases | 0.3 to 0.4             | 0.3 to 0.4           | (-13.43 to 10.47)      | (0.5 to 0.9)           | (0.4 to 0.8)        | (-6.94 to -0.74)     | (0.0 to -0.05)       | (0.0 to -0.05)       | (-64.94 to -17.15) | (0.0 to 0.3)           | (0.0 to 0.3)           | (-70.28 to 27.14)   | (0.2 to 0.4)         | (0.2 to 0.4)         | (-0.9 to 1.5)       | (0.9 to 1.5)           | (-0.8 to 1.5)          | (-15.05 to 5.14)    |                     |
| Hepatitis                           | 1.3                    | 4.1                  | 17.3                   | 7.2                    | 7.1                 | 2.3                  | 2.8                  | 2.8                  | 32.2               | 3.8                    | 3.7                    | 1.5                 | 1.5                  | 1.5                  | 7.3                 | 3.1                    | 11.9                   | 3.1                 |                     |
| (3.0 to 4.2)                        | (3.1 to 4.9)           | (8.13 to 30.52)      | (6.0 to 8.6)           | (6.0 to 8.6)           | (-6.77 to 11.82)    | (-6.77 to 11.82)     | (-6.77 to 11.82)     | (-6.77 to 11.82)     | (16.83 to 31.1)    | (7.8 to 10.8)          | (7.8 to 10.8)          | (-14.11 to 0.46)    | (0.9 to 1.5)         | (0.9 to 1.5)         | (5.81 to 21.75)     | (8.8 to 12)            | (4.3 to 8.7)           | (2.13 to 24.31)     |                     |
| Hepatitis A                         | 1.6                    | 1.9                  | 23.5                   | 3.7                    | 3.7                 | 1.5                  | 1.1                  | 0.9                  | 8.3                | 0.9                    | 0.8                    | 26.1                | 1.3                  | 1.3                  | 1.3                 | 3.4                    | 3.4                    | 3.4                 | 3.4                 |
| (1.1 to 2.1)                        | (1.1 to 2.1)           | (12.20 to 38.38)     | (2.4 to 4.5)           | (2.4 to 4.5)           | (-1.20 to 21.37)    | (-1.20 to 21.37)     | (-1.20 to 21.37)     | (-1.20 to 21.37)     | (1.0 to 18.59)     | (2.6 to 5.5)           | (2.6 to 5.5)           | (-2.36 to 39.9)     | (0.5 to 0.9)         | (0.5 to 0.9)         | (12.12 to 42.64)    | (2.1 to 4.1)           | (2.1 to 4.1)           | (2.18 to 27.39)     |                     |
| Hepatitis B                         | 1.7                    | 1.7                  | 4.2                    | 1.1                    | 1.1                 | 2.9                  | 1.1                  | 1.1                  | 1.1                | 1.1                    | 1.1                    | 1.1                 | 1.1                  | 1.1                  | 1.1                 | 1.1                    | 1.1                    | 1.1                 | 1.1                 |
| (1.3 to 2.1)                        | (1.3 to 2.1)           | (2.0 to 6.4)         | (1.0 to 1.4)           | (1.0 to 1.4)           | (-2.5 to 4.1)       | (-2.5 to 4.1)        | (-2.5 to 4.1)        | (-2.5 to 4.1)        | (-17.33 to 19.02)  | (0.9 to 1.8)           | (0.9 to 1.8)           | (-31.82 to 2.19)    | (0.3 to 0.5)         | (0.3 to 0.5)         | (0.3 to 0.7)        | (1.1 to 2.0)           | (1.0 to 2.3)           | (-1.14 to 22.12)    |                     |
| Hepatitis C                         | 0.2                    | 0.2                  | 55.1                   | 0.4                    | 0.4                 | 0.1                  | 0.1                  | 0.1                  | 64.9               | 0.6                    | 0.6                    | 41.2                | 0.4                  | 0.4                  | 41.2                | 0.4                    | 2.3                    | 2.3                 | 2.3                 |
| (0.1 to 0.4)                        | (0.2 to 0.7)           | (11.12 to 118.42)    | (0.2 to 0.8)           | (0.2 to 0.8)           | (-0.2 to 0.6)       | (-0.2 to 0.6)        | (-0.2 to 0.6)        | (-0.2 to 0.6)        | (4.48 to 74.88)    | (0.3 to 0.9)           | (0.3 to 0.9)           | (-4.28 to 91.35)    | (0.1 to 0.1)         | (0.1 to 0.2)         | (1.47 to 91.25)     | (0.2 to 0.5)           | (0.2 to 0.7)           | (-1.34 to 64.71)    |                     |
| Leptony                             | -0.05                  | -0.05                | -0.05                  | -0.05                  | -0.05               | -0.05                | -0.05                | -0.05                | -0.05              | -0.05                  | -0.05                  | -0.05               | -0.05                | -0.05                | -0.05               | -0.05                  | -0.05                  | -0.05               | -0.05               |
| (0.0 to -0.05)                      | (0.0 to -0.05)         | (0.0 to -0.05)       | (0.0 to -0.05)         | (0.0 to -0.05)         | (0.0 to -0.05)      | (0.0 to -0.05)       | (0.0 to -0.05)       | (0.0 to -0.05)       | (0.0 to -0.05)     | (0.0 to -0.05)         | (0.0 to -0.05)         | (0.0 to -0.05)      | (0.0 to -0.05)       | (0.0 to -0.05)       | (0.0 to -0.05)      | (0.0 to -0.05)         | (0.0 to -0.05)         | (0.0 to -0.05)      | (0.0 to -0.05)      |
| Other infectious diseases           | 16.9                   | 16.4                 | 0.7                    | 29.0                   | 29.3                | 10.2                 | 10.5                 | 9.5                  | 49.5               | 6.3                    | 6.3                    | -10.0               | 6.3                  | 6.3                  | 3.9                 | 3.6                    | 3.6                    | 3.6                 | 3.6                 |
| (13.5 to 22.8)                      | (11.4 to 21.2)         | (24.2 to 34.5)       | (31.0 to 51.9)         | (31.0 to 51.9)         | (-39.74 to 19.99)   | (8.3 to 34.9)        | (8.3 to 34.9)        | (8.3 to 34.9)        | (-32.22 to 25.00)  | (5.8 to 6.9)           | (5.8 to 6.9)           | (-38.00 to 12.44)   | (5.0 to 8.9)         | (5.0 to 8.9)         | (-0.7 to 12.44)     | (2.2 to 40.5)          | (2.2 to 40.5)          | (-48.89 to 50.20)   | (-48.89 to 50.20)   |
| Non-communicable diseases           | 13,006.6               | 12,062.3             | 7.3                    | 21,935.7               | 21,935.7            | 21.9                 | 5,989.1              | 5,989.1              | 24,700.8           | 17,893.5               | 27.6                   | 6,420.0             | 6,073.2              | 6,073.2              | 19,913.6            | 16,562.4               | 16,562.4               | 16,562.4            | 16,562.4            |
| (11,649.4 to 14,501.9)              | (10,431.9 to 13,863.2) | (-11,000.4 to 4,406) | (14,000.3 to 20,242.1) | (14,000.3 to 20,242.1) | (-25,276 to 18,989) | (5,970.3 to 7,252.9) | (5,970.3 to 7,252.9) | (5,970.3 to 7,252.9) | (-43,388 to 5,333) | (22,300.4 to 27,401.3) | (15,440.9 to 20,583.8) | (-31,366 to 24,399) | (5,654.0 to 7,274.7) | (5,654.0 to 7,274.7) | (-9,465 to 4,88)    | (17,255.0 to 22,804.1) | (13,400.5 to 19,562.1) | (-20,400 to 13,660) | (-20,400 to 13,660) |
| Neoplasms                           | 2,980.2                | 2,940.1              | -27.1                  | 1,430.9                | 1,430.9             | -3.3                 | 3,639.3              | 3,639.3              | 4,899.3            | 3,743.3                | 1,997.3                | 1,004               | 2,795.5              | 2,795.5              | 1,004               | 3,792.5                | 3,792.5                | 3,792.5             | 3,792.5             |
| (2,504.9 to 2,677.7)                | (2,196.9 to 2,468.1)   | (-14,340 to -41.3)   | (4,039.4 to 4,309.0)   | (4,039.4 to 4,309.0)   | (-31,06 to 23,46)   | (1,314.7 to 1,400.8) | (1,314.7 to 1,400.8) | (1,314.7 to 1,400.8) | (-45,132 to 1,82)  | (4,696.5 to 4,998.8)   | (3,184.4 to 3,624.2)   | (-35,57 to 2,30)    | (1,814.1 to 1,326.5) | (1,814.1 to 1,326.5) | (-988.1 to 1,187.5) | (4,891 to 2,46)        | (3,522 to 3,998.5)     | (2,508 to 2,983.2)  | (-32,37 to 11,662)  |
| Esophageal cancer                   | 91.7                   | 111.0                | 21.1                   | 146.1                  | 146.0               | -2.9                 | 82.1                 | 82.1                 | 214.0              | 150.7                  | 220.4                  | 3.0                 | 31.2                 | 31.2                 | 28.9                | 7.1                    | 84.2                   | 84.2                | 84.2                |
| (89.9 to 100.9)                     | (97.5 to 136.5)        | (132.4 to 158.6)     | (122.5 to 171.0)       | (122.5 to 171.0)       | (-15.31 to 12.63)   | (52.6 to 68.9)       | (52.6 to 68.9)       | (52.6 to 68.9)       | (13.97 to 64.47)   | (186.3 to 244.5)       | (186.3 to 244.5)       | (-13.41 to 24.09)   | (29.7 to 33.7)       | (29.7 to 33.7)       | (25.8 to 32.7)      | (80.2 to 90.6)         | (80.2 to 90.6)         | (-31.27 to -11.08)  | (-31.27 to -11.08)  |
| Stomach cancer                      | 141.6                  | 140.3                | 45.5                   | 103.3                  | 103.3               | -47.3                | 35.4                 | 35.4                 | 47.3               | 40.2                   | 46.5                   | 53.3                | 30.9                 | 30.9                 | 14.6                | 68.4                   | 68.4                   | 68.4                | 68.4                |
| (154 to 188.8)                      | (74.9 to 95.6)         | (-49.57 to -40.56)   | (215 to 255.8)         | (215 to 255.8)         | (91.1 to 115.7)     | (98.3 to 103.6)      | (98.3 to 103.6)      | (98.3 to 103.6)      | (-51.81 to -47.26) | (343.9 to 363.2)       | (128.5 to 137.4)       | (-49.91 to -57.17)  | (40.6 to 68.2)       | (40.6 to 68.2)       | (-22.8 to 40.6)     | (-49.14 to 28.74)      | (107.4 to 179.3)       | (51.0 to 69.5)      | (-56.99 to -41.14)  |
| Liver cancer                        | 28.4                   | 28.4                 | 64.1                   | 31.4                   | 31.4                | 64.1                 | 18.4                 | 18.4                 | 41.4               | 30.8                   | 46.5                   | 17.8                | 11.4                 | 11.4                 | 7.8                 | 27.8                   | 27.8                   | 27.8                | 27.8                |
| (24.7 to 35.3)                      | (27.5 to 37.2)         | (80.89 to 109.35)    | (39.9 to 57.0)         | (39.9 to 57.0)         | (49.4 to 74.2)      | (6.34 to 66.45)      | (14.7 to 24.9)       | (14.7 to 24.9)       | (-6.34 to 120.23)  | (52.5 to 88.3)         | (57.1 to 104.5)        | (-15.49 to 67.69)   | (9.6 to 13.4)        | (9.6 to 13.4)        | (12.9 to 21.1)      | (16.83 to 105.62)      | (28.4 to 37.6)         | (31.6 to 50.8)      | (-1.32 to 16.4)     |
| Liver cancer due to hepatitis B     | 6.3                    | 6.3                  | 10.8                   | 6.3                    | 6.3                 | 10.8                 | 4.1                  | 4.1                  | 8.3                | 4.1                    | 4.1                    | 11.4                | 3.0                  | 3.0                  | 1.2                 | 11.4                   | 11.4                   | 11.4                | 11.4                |
| (4.9 to 7.9)                        | (8.9 to 15.0)          | (39.89 to 129.55)    | (13.3 to 20.6)         | (13.3 to 20.6)         | (-12.2 to 6.5)      | (13.72 to 115.42)    | (1.2 to 6.0)         | (1.2 to 6.0)         | (-22.24 to 132.70) | (10.3 to 21.7)         | (10.3 to 21.7)         | (-10.32 to 19.01)   | (2.9 to 6.0)         | (2.9 to 6.0)         | (4.6 to 8.0)        | (46.06 to 290.05)      | (46.06 to 290.05)      | (46.06 to 290.05)   | (46.06 to 290.05)   |
| Liver cancer due to hepatitis C     | 6.3                    | 6.3                  | 305.6                  | 9.9                    | 9.9                 | 227.0                | 3.2                  | 3.2                  | 47.3               | 22.2                   | 22.2                   | 20.3                | 9.5                  | 9.5                  | 3.6                 | 22.2                   | 22.2                   | 22.2                | 22.2                |
| (5.0 to 8.0)                        | (18.8 to 30.7)         | (191.32 to 149.16)   | (7.9 to 12.7)          | (7.9 to 12.7)          | (24.1 to 39.3)      | (136.75 to 338.72)   | (1.0 to 5.7)         | (1.0 to 5.7)         | (136.67 to 474.04) | (10.5 to 24.3)         | (10.5 to 24.3)         | (-27.4 to 55.4)     | (1.7 to 10.0)        | (1.7 to 10.0)        | (-168.82 to 484.69) | (4.8 to 8.5)           | (16.4 to 28.0)         | (128.24 to 398.55)  | (128.24 to 398.55)  |
| Liver cancer due to alcohol use     | 13.9                   | 13.9                 | 9.9                    | 29.2                   | 29.2                | 9.9                  | 12.2                 | 12.2                 | 29.2               | 8.7                    | 8.7                    | 8.1                 | 8.7                  | 8.7                  | 8.1                 | 8.7                    | 8.7                    | 8.7                 | 8.7                 |
| (10.9 to 16.7)                      | (6.8 to 12.5)          | (-50.65 to 1.57)     | (17.1 to 26.2)         | (17.1 to 26.2)         | (8.4 to 15.5)       | (-60.35 to -20.16)   | (6.4 to 11.8)        | (6.4 to 11.8)        | (-4.3 to 9.7)      | (-51.79 to 27.20)      | (-22.4 to 15.9)        | (-11.4 to 25.9)     | (4.0 to 5.9)         | (4.0 to 5.9)         | (-62.42 to 23.49)   | (11.0 to 16.4)         | (4.2 to 7.4)           | (-40.78 to -40.21)  | (-40.78 to -40.21)  |
| Liver cancer due to other causes    | 2.9                    | 2.9                  | 10.4                   | 4.9                    | 4.9                 | 28.2                 | 1.1                  | 1.1                  | 4.7                | 4.2                    | 4.2                    | 5.9                 | 1.9                  | 1.9                  | 9.0                 | 4.9                    | 10.9                   | 10.9                | 10.9                |
| (1.9 to 3.5)                        | (1.9 to 3.5)           | (-40.75 to 31.9)     | (-4.0 to 13.9)         | (-4.0 to 13.9)         | (-18.2 to 6.3)      | (-46.47 to 6.89)     | (0.8 to 1.0)         | (0.8 to 1.0)         | (-6.47 to 6.89)    | (1.8 to 6.8)           | (1.8 to 6.8)           | (-13.3 to 4.5)      | (1.3 to 2.5)         | (1.3 to 2.5)         | (-35.05 to 63.07)   | (4.2 to 9.9)           | (5.5 to 9.9)           | (-4.2 to 9.9)       | (-4.2 to 9.9)       |
| Larynx cancer                       | 13.7                   | 13.5                 | -34.1                  | 28.8                   | 27.3                | 14.7                 | 30.7                 | 30.7                 | 27.3               | 28.2                   | 28.2                   | 2.7                 | 8.2                  | 8.2                  | 7.0                 | 8.2                    | 8.2                    | 8.2                 | 8.2                 |
| (13.7 to 22.0)                      | (10.7 to 16.8)         | (-28.12 to -34.87)   | (22.2 to 35.7)         | (22.2 to 35.7)         | (13.7 to 21.4)      | (-47.07 to -32.97)   | (10.8 to 18.7)       | (10.8 to 18.7)       | (-7.7 to 13.8)     | (37.96 to 16.50)       | (38.2 to 66.4)         | (-21.0 to 37.2)     | (-52.59 to 36.96)    | (-52.59 to 36.96)    | (21.04 to 2)        | (18.9 to 40)           | (28.19 to 13.42)       | (62.12 to 6)        | (45.10 to 10)       |
| Trachea, bronchus and lung cancer   | 643.3                  | 643.3                | 506.8                  | 458.7                  | 458.7               | 506.8                | 458.7                | 458.7                | 506.8              | 458.7                  | 458.7                  | 458.7               | 458.7                | 458.7                | 458.7               | 458.7                  | 458.7                  | 458.7               | 458.7               |
| (626.7 to 675.7)                    | (463.0 to 548.8)       | (-28.26 to -14.28)   | (975.3 to 1,049.1)     | (975.3 to 1,049.1)     | (578.3 to 687.1)    | (-42.43 to 31.32)    | (431.0 to 45.3)      | (431.0 to 45.3)      | (258.7 to 326.9)   | (-42.40 to -25.97)     | (1,505.5 to 1,572.9)   | (678.3 to 860.7)    | (-56.58 to 43.96)    | (189.9 to 20.23)     | (174.3 to 235.9)    | (-13.69 to 20.23)      | (535.3 to 661.0)       | (422.2 to 564.9)    | (-26.87 to 30.4)    |
| Breast cancer                       | 913.9                  | 913.9                | 239.1                  | 332.6                  | 332.6               | 239.1                | 332.6                | 332.6                | 239.1              | 1.6                    | 6.3                    | 4.0                 | 34.5                 | 34.5                 | 31.2                | 23.8                   | 1,022.1                | 620.3               | 620.3               |
| (263.6 to 364.2)                    | (192.3 to 264.4)       | (-30.08 to 24.04)    | (448.9 to 615.5)       | (448.9 to 615.5)       | (26.3 to 28.3)      | (-44.82 to 24.04)    | (0.8 to 3.7)         | (0.8 to 3.7)         | (-0.8 to 3.7)      | (-34.26 to 19.22)      | (3.0 to 13.2)          | (2.4 to 7.4)        | (-50.00 to -10.58)   | (-21.2 to 18.22)     | (-34.54 to 33.63)   | (114.3 to 156.4)       | (59.7 to 24.8)         | (-90.74 to 74.2)    | (-44.00 to 30.87)   |
| Cervical cancer                     | 43.2                   | 45.2                 | 24.7                   | 41.4                   | 41.4                | 24.7                 | 75.4                 | 75.4                 | 41.4               | 30.2                   | 30.2                   | 30.2                | 30.2                 | 30.2                 | 30.2                | 30.2                   | 30.2                   | 30.2                | 30.2                |
| (33.1 to 42.2)                      | (20.4 to 28.7)         | (-19.30 to -33.63)   | (59.2 to 81.0)         | (59.2 to 81.0)         | (-30.2 to 47.0)     | (-57.70 to 44.20)    | (9.1 to 43.3)        | (9.1 to 43.3)        | (-9.1 to 43.3)     | (38.2 to 66.4)         | (-21.0 to 37.2)        | (-52.59 to 36.96)   | (-52.59 to 36.96)    | (-52.59 to 36.96)    | (21.04 to 2)        | (18.9 to 40)           | (28.19 to 13.42)       | (62.12 to 6)        | (45.10 to 10)       |
| Uterine cancer                      | 28.1                   | 28.1                 | 41.1                   | 28.1                   | 28.1                | 41.1                 | 28.1                 | 28.1                 | 41.1               | 28.1                   | 28.1                   | 28.1                | 28.1                 | 28.1                 | 28.1                | 28.1                   | 28.1                   | 28.1                | 28.1                |
| (17.0 to 23.3)                      | (19.4 to 30.4)         | (-2.22 to 65.65)     | (19.4 to 30.4)         | (19.4 to 30.4)         | (-2.22 to 65.65)    | (-2.22 to 65.65)     | (-2.22 to 65.65)     | (-2.22 to 65.65)     | (-2.22 to 65.65)   | (-2.22 to 65.65)       | (-2.22 to 65.65)       | (-2.22 to 65.65)    | (-2.22 to 65.65)     | (-2.22 to 65.65)     | (-2.22 to 65.65)    | (-2.22 to 65.65)       | (-2.22 to 65.65)       | (-2.22 to 65.65)    | (-2.22 to 65.65)    |
| Prostate cancer                     | 119.1                  | 119.1                | 21.1                   | 154.1                  | 154.1               | 21.1                 | 114.7                | 114.7                | 21.1               | 114.7                  | 114.7                  | 34.4                | -34.2                | -34.2                | 114.7               | 114.7                  | 114.7                  | 114.7               | 114.7               |
| (89.1 to 126.3)                     | (91.3 to 126.3)        | (-11.21 to 126.3)    | (129.1 to 209.2)       | (129.1 to 209.2)       | (-11.21 to 126.3)   | (-11.21 to 12        |                      |                      |                    |                        |                        |                     |                      |                      |                     |                        |                        |                     |                     |

|                                                     |                    |                    |                  |                      |                      |                  |                  |                  |                   |                      |                      |                      |                  |                  |                  |                      |                  |                      |
|-----------------------------------------------------|--------------------|--------------------|------------------|----------------------|----------------------|------------------|------------------|------------------|-------------------|----------------------|----------------------|----------------------|------------------|------------------|------------------|----------------------|------------------|----------------------|
| Pneumococci                                         | 74                 | 72                 | 24               | 106                  | 80                   | 282              | 68               | 68               | 0.7               | 23.9                 | 16.7                 | -28.7                | 0.6              | 0.4              | -35.5            | 1.8                  | 4.4              | 97.5                 |
|                                                     | (5.1 to 9.9)       | (4.1 to 10.3)      | (25.1 to 31.0)   | (7.7 to 14.2)        | (5.1 to 11.3)        | (4.1 to 10.5)    | (6.7 to 9.4)     | (6.4 to 9.3)     | (2.4 to 3.6)      | (16.6 to 33.1)       | (13.0 to 31.2)       | (-4.7 to 21.5)       | (0.5 to 0.8)     | (0.2 to 0.5)     | (-45.1 to 13.8)  | (1.4 to 4.4)         | (0.9 to 4.1)     | (49.9 to 26.3)       |
| Silicosis                                           | 0.4                | 0.3                | 53.6             | 0.5                  | 58.1                 | 0.5              | 0.2              | 0.2              | 57.9              | 2.0                  | 4.6                  | 47.0                 | 0.1              | -0.5             | 9.9              | 0.2                  | 9.7              | 0.0                  |
|                                                     | (0.0 to 0.4)       | (0.0 to 0.4)       | (63.7 to 38.7)   | (0.0 to 0.5)         | (66.7 to 48.0)       | (0.0 to 0.7)     | (0.0 to 0.3)     | (0.0 to 0.3)     | (68.3 to 41.5)    | (1.4 to 2.6)         | (0.4 to 0.9)         | (7.6 to 56.3)        | (0.0 to 0.1)     | (0.0 to 0.1)     | (2.6 to 16.5)    | (0.2 to 0.3)         | (0.1 to 0.2)     | (28.1 to 6.9)        |
| Asbestosis                                          | 1.3                | 1.1                | 118              | 1.3                  | 118                  | 1.3              | 1.3              | 1.3              | 118               | 2.1                  | 2.1                  | 118                  | 1.1              | 1.1              | 118              | 1.1                  | 1.1              | 118                  |
|                                                     | (1.0 to 2.1)       | (2.2 to 4.9)       | (67.4 to 228.1)  | (1.5 to 3.0)         | (2.4 to 5.4)         | (31.5 to 147.9)  | (1.0 to 2.0)     | (1.0 to 4.8)     | (68.9 to 236.1)   | (3.4 to 7.0)         | (5.2 to 11.8)        | (31.2 to 155.3)      | (0.0 to 0.1)     | (0.0 to 0.1)     | (1.1 to 18.5)    | (0.2 to 0.3)         | (0.2 to 0.3)     | (17.3 to 54.7)       |
| Coal workers pneumoconiosis                         | 2.6                | 2.3                | 11.8             | 3.7                  | 11.1                 | 2.6              | 2.3              | 2.3              | 11.1              | 5.6                  | 5.6                  | 11.1                 | 0.1              | -0.5             | 2.2              | 0.1                  | 2.2              | 0.2                  |
|                                                     | (1.8 to 3.4)       | (1.3 to 3.4)       | (1.9 to 21.0)    | (2.8 to 5.0)         | (1.1 to 2.6)         | (1.8 to 8.6)     | (1.5 to 2.4)     | (1.5 to 8.4)     | (1.9 to 8.6)      | (2.0 to 12.6)        | (3.6 to 8.2)         | (1.9 to 11.1)        | (0.0 to 0.1)     | (0.0 to -0.05)   | (0.5 to 4.8)     | (0.2 to 0.3)         | (0.1 to 0.2)     | (4.7 to 13.8)        |
| Other pneumoconiosis                                | 2.7                | 2.4                | 49.8             | 2.4                  | 49.8                 | 2.4              | 2.4              | 2.4              | 49.8              | 2.2                  | 2.2                  | 49.8                 | 1.1              | 1.1              | 49.8             | 1.1                  | 1.1              | 49.8                 |
|                                                     | (2.0 to 3.4)       | (0.9 to 1.8)       | (61.9 to 27.0)   | (2.9 to 5.0)         | (1.1 to 2.0)         | (1.5 to 3.0)     | (0.7 to 1.5)     | (0.5 to 1.0)     | (65.0 to 36.7)    | (1.5 to 10.9)        | (1.7 to 3.8)         | (3.0 to 0.6)         | (0.2 to 0.3)     | (0.3 to 0.6)     | (9.9 to 1.6)     | (0.4 to 0.8)         | (0.4 to 0.8)     | (47.2 to 48.3)       |
| Asthma                                              | 139.3              | 135                | 254.2            | 139.3                | 254.2                | 139.3            | 139.3            | 139.3            | 254.2             | 247.0                | 247.0                | 254.2                | 139.3            | 139.3            | 254.2            | 139.3                | 139.3            | 254.2                |
|                                                     | (103.0 to 190.9)   | (94.9 to 182.0)    | (113.0 to 332.1) | (187.3 to 339.5)     | (246.4 to 319.2)     | (147.9 to 379.4) | (42.0 to 311.0)  | (16.7 to 276.5)  | (183.0 to 324.2)  | (167.9 to 276.5)     | (183.0 to 324.2)     | (167.9 to 276.5)     | (42.0 to 311.0)  | (16.7 to 276.5)  | (183.0 to 324.2) | (167.9 to 276.5)     | (183.0 to 324.2) | (167.9 to 276.5)     |
| Interstitial lung disease and pulmonary sarcoidosis | 21.6               | 44.1               | 79.6             | 20.8                 | 54.1                 | 79.6             | 20.8             | 54.1             | 79.6              | 20.8                 | 54.1                 | 79.6                 | 20.8             | 54.1             | 79.6             | 20.8                 | 54.1             | 79.6                 |
|                                                     | (15.3 to 33.4)     | (21.3 to 63.7)     | (15.6 to 260.2)  | (23.8 to 50.9)       | (20.1 to 76.0)       | (31.0 to 181.6)  | (10.8 to 24.4)   | (12.0 to 37.7)   | (25.1 to 218.1)   | (8.4 to 85.7)        | (11.5 to 97.7)       | (4.4 to 147.7)       | (4.2 to 14.3)    | (6.2 to 29.2)    | (11.1 to 156.3)  | (12.0 to 39.5)       | (14.7 to 65.5)   | (25.9 to 282.5)      |
| Other chronic respiratory diseases                  | 35.1               | 35.1               | 48.6             | 48.6                 | 48.6                 | 48.6             | 48.6             | 48.6             | 48.6              | 48.6                 | 48.6                 | 48.6                 | 48.6             | 48.6             | 48.6             | 48.6                 | 48.6             | 48.6                 |
|                                                     | (28.4 to 45.4)     | (3.4 to 5.2)       | (46.7 to 73.8)   | (4.9 to 7.5)         | (14.2 to 19.2)       | (87.8 to 81.8)   | (19.2 to 25.0)   | (19.2 to 25.0)   | (5.9 to 76.7)     | (5.9 to 76.7)        | (5.9 to 76.7)        | (48.1 to 47.1)       | (13.0 to 28.0)   | (1.2 to 2.6)     | (37.4 to 39.5)   | (3.5 to 6.9)         | (3.5 to 6.9)     | (42.56 to 48.62)     |
| Cirrhosis                                           | 96.7               | 181.0              | 69.1             | 267.2                | 50.0                 | 50.0             | 118.8            | 118.8            | 50.0              | 214.5                | 351.7                | 64.9                 | 42.9             | 64.2             | 144.0            | 144.0                | 144.0            | 275.1                |
|                                                     | (86.1 to 102.8)    | (169.0 to 192.5)   | (69.1 to 94.5)   | (173.0 to 193.3)     | (40.1 to 60.2)       | (51.1 to 98.2)   | (107.4 to 126.2) | (107.4 to 126.2) | (40.1 to 60.2)    | (208.1 to 219.9)     | (323.0 to 351.7)     | (51.1 to 79.2)       | (41.1 to 45.9)   | (57.9 to 69.9)   | (35.6 to 63.7)   | (37.4 to 115.7)      | (165.4 to 200.0) | (157.9 to 94.4)      |
| Cirrhosis due to hepatitis B                        | 10.5               | 18.6               | 80.3             | 18.6                 | 76.5                 | 18.6             | 76.5             | 18.6             | 76.5              | 22.1                 | 41.5                 | 27.7                 | 4.6              | 5.7              | 15.3             | 15.3                 | 15.3             | 23.7                 |
|                                                     | (9.0 to 12.6)      | (15.0 to 22.5)     | (38.2 to 122.5)  | (15.8 to 22.4)       | (21.8 to 32.8)       | (13.6 to 82.9)   | (4.8 to 7.1)     | (4.8 to 7.1)     | (33.5 to 122.9)   | (18.0 to 26.8)       | (24.6 to 39.5)       | (7.3 to 78.24)       | (3.5 to 6.2)     | (6.1 to 10.9)    | (22.9 to 165.04) | (11.5 to 27.1)       | (16.9 to 30.5)   | (27.2 to 123.70)     |
| Cirrhosis due to hepatitis C                        | 33.6 to 42.5       | 75.8 to 95.3       | 94.1 to 113.75   | 94.1 to 113.75       | 94.1 to 113.75       | 94.1 to 113.75   | 94.1 to 113.75   | 94.1 to 113.75   | 94.1 to 113.75    | 94.1 to 113.75       | 94.1 to 113.75       | 94.1 to 113.75       | 94.1 to 113.75   | 94.1 to 113.75   | 94.1 to 113.75   | 94.1 to 113.75       | 94.1 to 113.75   | 94.1 to 113.75       |
| Cirrhosis due to alcohol use                        | 41.7               | 53.2               | 27.9             | 72.9                 | 76.3                 | 5.2              | 26.4             | 43.1             | 63.8              | 98.8                 | 29.8                 | 29.8                 | 15.3             | 10.1             | 38.5             | 48.4                 | 48.4             | 48.8                 |
|                                                     | (36.1 to 46.1)     | (44.8 to 61.1)     | (7.2 to 10.0)    | (65.7 to 81.9)       | (65.4 to 88.1)       | (1.1 to 24.7)    | (21.2 to 29.7)   | (35.9 to 49.8)   | (33.6 to 103.6)   | (61.3 to 111.3)      | (105.1 to 148.0)     | (5.7 to 69.9)        | (12.8 to 13.7)   | (50.8 to 36.30)  | (38.6 to 57.0)   | (20.0 to 34.8)       | (20.0 to 34.8)   | (59.8 to 28.28)      |
| Cirrhosis due to other causes                       | 8.6 to 11.7        | 20.6 to 27.7       | 194.9 to 193.64  | 16.6 to 23.2         | 13.0 to 43.4         | 1.1 to 16.4      | 1.1 to 16.4      | 1.1 to 16.4      | 1.1 to 16.4       | 1.1 to 16.4          | 1.1 to 16.4          | 1.1 to 16.4          | 1.1 to 16.4      | 1.1 to 16.4      | 1.1 to 16.4      | 1.1 to 16.4          | 1.1 to 16.4      | 1.1 to 16.4          |
| Digestive diseases                                  | 253.6 to 317.4     | 260.8 to 347.6     | 3.9 to 16.83     | 395.8 to 502.0       | 329.8 to 474.5       | 2.2 to 6.78      | 113.5 to 141.8   | 329.8 to 474.5   | 2.2 to 6.78       | 113.5 to 141.8       | 329.8 to 474.5       | 2.2 to 6.78          | 113.5 to 141.8   | 329.8 to 474.5   | 2.2 to 6.78      | 113.5 to 141.8       | 329.8 to 474.5   | 2.2 to 6.78          |
| Peptic ulcer disease                                | 65.1               | 111.9              | 42.5             | 51.2                 | 55.2                 | 31.0             | 27.0             | 41.0             | 51.2              | 126.1                | 56.2                 | 57.1                 | 21.0             | 54.6             | 100.4            | 100.4                | 100.4            | 56.6                 |
|                                                     | (70.1 to 86.9)     | (36.0 to 55.8)     | (5.24 to 26.38)  | (9.6 to 128.5)       | (40.3 to 62.8)       | (62.19 to 44.11) | (25.7 to 45.0)   | (16.3 to 32.0)   | (42.35 to 2.23)   | (106.9 to 147.9)     | (42.3 to 81.5)       | (45.44 to 20.27)     | (33.4 to 49.8)   | (17.1 to 28.1)   | (54.98 to 40.84) | (82.1 to 122.2)      | (14.2 to 25.0)   | (45.6 to 45.52)      |
| Gastritis and duodenitis                            | 4.8 to 8.3         | 7.4 to 12.4        | 29.89 to 68.72   | 8.3 to 14.5          | 10.3 to 17.7         | 1.4 to 2.7       | 2.0 to 4.2       | 2.0 to 4.2       | 1.4 to 2.7        | 5.4 to 10.5          | 6.0 to 12.4          | 1.3 to 2.6           | 1.2 to 2.6       | 1.3 to 2.6       | 1.2 to 2.6       | 1.2 to 2.6           | 1.2 to 2.6       | 1.2 to 2.6           |
| Appendicitis                                        | 4.3 to 6.5         | 1.3 to 6.6         | 43.93 to 24.52   | 1.3 to 6.6           | 43.93 to 24.52       | 1.3 to 6.6       | 43.93 to 24.52   | 1.3 to 6.6       | 43.93 to 24.52    | 1.3 to 6.6           | 43.93 to 24.52       | 1.3 to 6.6           | 43.93 to 24.52   | 1.3 to 6.6       | 43.93 to 24.52   | 1.3 to 6.6           | 43.93 to 24.52   | 1.3 to 6.6           |
| Paralytic ileus and intestinal obstruction          | 12.2 to 25.0       | 23.9               | 46.5             | 25.1                 | 23.9                 | 46.5             | 25.1             | 23.9             | 46.5              | 25.1                 | 23.9                 | 46.5                 | 25.1             | 23.9             | 46.5             | 25.1                 | 23.9             | 46.5                 |
|                                                     | (16.0 to 35.0)     | (13.0 to 30.7)     | (8.8 to 79.28)   | (18.3 to 37.5)       | (15.4 to 35.9)       | (27.74 to 39.9)  | (4.8 to 12.6)    | (4.7 to 14.9)    | (21.50 to 114.74) | (18.0 to 46.9)       | (12.8 to 39.8)       | (41.79 to 52.43)     | (3.3 to 15.5)    | (6.3 to 38.6)    | (4.55 to 64.06)  | (13.4 to 39.1)       | (13.3 to 38.4)   | (20.79 to 35.00)     |
| Inguinal, femoral, and abdominal hernia             | 9.9 to 18.3        | 7.9 to 26.3        | 1.36 to 123.54   | 14.7 to 27.1         | 10.1 to 28.8         | 1.50 to 19.75    | 1.50 to 19.75    | 1.50 to 19.75    | 1.50 to 19.75     | 1.50 to 19.75        | 1.50 to 19.75        | 1.50 to 19.75        | 1.50 to 19.75    | 1.50 to 19.75    | 1.50 to 19.75    | 1.50 to 19.75        | 1.50 to 19.75    | 1.50 to 19.75        |
| Inflammatory bowel disease                          | 40.3 to 49.0       | 53.2 to 106.13     | 33.6             | 95.9                 | 106.5                | 36.1             | 95.9             | 106.5            | 36.1              | 95.9                 | 106.5                | 36.1                 | 95.9             | 106.5            | 36.1             | 95.9                 | 106.5            | 36.1                 |
| Vascular intestinal disorders                       | 23.0               | 33.9               | 33.4             | 10.1                 | 33.4                 | 10.1             | 33.4             | 10.1             | 33.4              | 10.1                 | 33.4                 | 10.1                 | 33.4             | 10.1             | 33.4             | 10.1                 | 33.4             | 10.1                 |
|                                                     | (14.0 to 35.1)     | (17.0 to 44.3)     | (11.0 to 78.45)  | (23.9 to 51.9)       | (20.8 to 51.0)       | (29.56 to 37.34) | (4.7 to 20.2)    | (4.8 to 24.2)    | (23.0 to 135.41)  | (16.5 to 71.5)       | (12.4 to 62.6)       | (41.1 to 64.83)      | (7.5 to 23.4)    | (7.2 to 26.4)    | (16.69 to 72.54) | (18.9 to 37.8)       | (15.3 to 56.0)   | (40.4 to 42.73)      |
| Gallbladder and biliary diseases                    | 17.1               | 26.8               | 43.1             | 26.8                 | 43.1                 | 26.8             | 43.1             | 26.8             | 43.1              | 26.8                 | 43.1                 | 26.8                 | 43.1             | 26.8             | 43.1             | 26.8                 | 43.1             | 26.8                 |
| Pancreatitis                                        | 20.0               | 23.1               | 15.8             | 33.8                 | 32.0                 | 11.1             | 13.8             | 25.0             | 41.7              | 8.9                  | 8.9                  | 41.7                 | 8.9              | 8.9              | 41.7             | 8.9                  | 8.9              | 41.7                 |
|                                                     | (16.2 to 25.4)     | (18.1 to 28.4)     | (3.37 to 29.47)  | (27.0 to 29.2)       | (27.0 to 29.2)       | (4.0 to 15.4)    | (2.0 to 39.2)    | (4.0 to 15.4)    | (4.0 to 15.4)     | (2.0 to 39.2)        | (4.0 to 15.4)        | (2.0 to 39.2)        | (4.0 to 15.4)    | (2.0 to 39.2)    | (4.0 to 15.4)    | (2.0 to 39.2)        | (4.0 to 15.4)    | (2.0 to 39.2)        |
| Other digestive diseases                            | 49.7               | 55.0               | 76.9             | 90.9                 | 88.3                 | 27.9             | 14.3             | 27.9             | 14.3              | 27.9                 | 14.3                 | 27.9                 | 14.3             | 27.9             | 14.3             | 27.9                 | 14.3             | 27.9                 |
| Neurological disorders                              | 911.1              | 1,138.4            | 22.1             | 1,546.7              | 460.1                | 22.1             | 1,546.7          | 460.1            | 22.1              | 1,546.7              | 460.1                | 22.1                 | 1,546.7          | 460.1            | 22.1             | 1,546.7              | 460.1            | 22.1                 |
|                                                     | (755.4 to 1,103.9) | (923.0 to 1,348.0) | (35.28 to 29.16) | (1,236.1 to 1,901.0) | (1,236.9 to 1,903.6) | (4.17 to 3.79)   | (301.0 to 420.5) | (391.9 to 542.7) | (21.00 to 38.1)   | (1,188.8 to 1,668.2) | (1,134.0 to 1,623.2) | (1,134.0 to 1,623.2) | (452.0 to 862.6) | (527.9 to 866.4) | (9.88 to 26.61)  | (1,312.2 to 1,819.9) | (4.21 to 9.07)   | (1,312.2 to 1,819.9) |
| Alzheimer disease and other dementias               | 350.3              | 463.4              | 15.8             | 452.9                | 442.4                | 2.2              | 72.2             | 198.0            | 485.5             | 459.9                | 22.8                 | 22.8                 | 22.8             | 22.8             | 48.1             | 43.1                 | 43.1             | 43.1                 |
|                                                     | (314.2 to 390.7)   | (412.8 to 514.6)   | (9.79 to 43.48)  | (406.1 to 504.7)     | (414.5 to 510.9)     | (1.16 to 3.68)   | (74.8 to 216.0)  | (174.8 to 216.0) | (485.5 to 496.9)  | (485.5 to 496.9)     | (1.16 to 3.68)       | (74.8 to 216.0)      | (174.8 to 216.0) | (485.5 to 496.9) | (1.16 to 3.68)   | (74.8 to 216.0)      | (174.8 to 216.0) | (485.5 to 496.9)     |
| Parkinson disease                                   | 45.4               | 50.1               | 10.6             | 60.8                 | 53.3                 | 10.3             | 25.0             | 30.3             | 34.7              | 88.4                 | 29.4                 | 29.4                 | 29.4             | 29.4             | 29.4             | 29.4                 | 29.4             | 29.4                 |
|                                                     | (42.1 to 50.8)     | (42.1 to 57.2)     | (10.6 to 19.49)  | (50.2 to 67.3)       | (49.0 to 61.0)       | (2.15 to 5.17)   | (21.0 to 27.0)   | (25.0 to 34.4)   | (6.80 to 34.0)    | (74.2 to 95.6)       | (40.4 to 83.7)       | (26.86 to 7.93)      | (15.3 to 23.2)   | (14.5 to 23.6)   | (33.5 to 50.7)   | (27.0 to 44.6)       | (27.0 to 44.6)   | (55.4 to 5.46)       |
| Epilepsy                                            | 98.1               | 106.0              | 10.1             | 106.0                | 106.0                | 10.1             | 106.0            | 106.0            | 10.1              | 106.0                | 106.0                | 10.1                 | 106.0            | 106.0            | 10.1             | 106.0                | 106.0            | 10.1                 |
|                                                     | (71.2 to 122.5)    | (66.2 to 121.2)    | (2.61 to 25.83)  | (148.2 to 254.8)     | (122.2 to 223.0)     | (34.0 to 11.17)  | (39.6 to 67.7)   | (37.4 to 66.1)   | (25.69 to 24.09)  | (367.9 to 287.1)     | (138.7 to 247.1)     | (34.58 to 10.85)     | (31.5 to 55.7)   | (28.9 to 9.48)   | (28.1 to 29.35)  | (105.4 to 198.9)     | (35.5 to 35.36)  | (35.5 to 35.36)      |
| Multiple sclerosis                                  | 85.4               | 65.6               | 37.5             | 48.6                 | 37.5                 | 54.1             | 12.7             | 12.7             | 37.5              | 31.8                 | 42.0                 | 42.0                 | 42.0             | 42.0             | 42.0             | 42.0                 | 42.0             | 42.0                 |
|                                                     | (28.2 to 47.6)     | (38.1 to 60.0)     | (12.3 to 56.32)  | (52.8 to 87.5)       | (50.9 to 92.6)       | (4.10 to 29.77)  | (9.1 to 19.1)    | (11.9 to 23.4)   | (7.75 to 60.65)   | (35.0 to 72.5)       | (37.5 to 72.8)       | (23.62 to 11.38)     | (17.9 to 31.1)   | (24.3 to 10.99)  | (16.68 to 63.09) | (64.6 to 111.6)      | (73.4 to 120.5)  | (1.39 to 36.80)      |
| Migraine                                            | 144.4 to 157.6     | 161.2 to 187.2     | 295.6 to 727.7   | 161.2 to 187.2       | 295.6 to 727.7       | 161.2 to 187.2   | 295.6 to 727.7   | 161.2 to 187.2   | 295.6 to 727.7    | 161.2 to 187.2       | 295.6 to 727.7       | 161.2 to 187.2       | 295.6 to 727.7   | 161.2 to 187.2   | 295.6 to 727.7   | 161.2 to 187.2       | 295.6 to 727.7   | 161.2 to 187.2       |
| Tension-type headache                               | 15.5               | 21.7               | 40.9             | 30.6                 | 38.3                 | 9.8              | 9.8              | 9.8              | 42.8              | 23.7                 | 33.8                 | 8.1                  | 8.1              | 8.1              | 27.3             | 27.3                 | 27.3             | 27.3                 |
|                                                     | (7.4 to 24.0)      | (10.6 to 37.4)     | (25.33 to 66.4)  | (14.6 to 37.4)       | (18.1 to 45.4)       | (1.16 to 16.41)  | (2.16 to 42.1)   | (2.16 to 42.1)   | (1.16 to 16.41)   | (16.6 to 46.6)       | (16.6 to 46.6)       | (24.43 to 10.74)     | (4.5 to 17.61)   | (5.9 to 21.42)   | (8.18 to 50.02)  | (20.8 to 47.4)       | (3.34 to 15.35)  | (3.34 to 15.35)      |
| Medication overuse headache                         | 54.4               | 104.5              | 16.6             | 51.8                 | 57.2                 | 38.5             | 38.5             | 38.5             | 57.2              | 38.5                 | 38.5                 | 57.2                 | 38.5             | 38.5             |                  |                      |                  |                      |



|                                    |                                |                               |                               |                                |                                |                                  |                              |                               |                               |                                |                               |                                  |                               |                              |                                  |                               |                               |                                |                        |
|------------------------------------|--------------------------------|-------------------------------|-------------------------------|--------------------------------|--------------------------------|----------------------------------|------------------------------|-------------------------------|-------------------------------|--------------------------------|-------------------------------|----------------------------------|-------------------------------|------------------------------|----------------------------------|-------------------------------|-------------------------------|--------------------------------|------------------------|
| Cataract                           | 10.2<br>(6.0 to 14.8)          | 9.3<br>(6.0 to 13.9)          | 7.7<br>(1.7 to 13.8)          | 13.7<br>(8.0 to 21.3)          | 9.5<br>(6.0 to 13.9)           | 30.7<br>(17.0 to 47.5)           | 3.1<br>(0.0 to 5.1)          | 3.3<br>(0.0 to 5.1)           | 7.1<br>(1.0 to 12.0)          | 11.6<br>(7.1 to 16.9)          | 8.0<br>(4.9 to 12.1)          | 31.0<br>(42.06 to 20.1)          | 7.1<br>(4.6 to 9.6)           | 6.1<br>(3.9 to 8.9)          | -33.6<br>(-36.9 to -30.7)        | 15.1<br>(9.8 to 21.1)         | 10.6<br>(6.9 to 15.3)         | 29.2<br>(19.0 to 41.5)         |                        |
| Macular degeneration               | 14.4<br>(9.3 to 20.5)          | 17.3<br>(11.3 to 24.9)        | 20.5<br>(10.66 to 33.7)       | 20.2<br>(13.1 to 28.7)         | 25.3<br>(12.0 to 35.9)         | 9.4<br>(-15.79 to -1.65)         | 4.5<br>(2.9 to 6.5)          | 6.5<br>(4.2 to 9.2)           | 63.9<br>(29.36 to 64.9)       | 16.7<br>(10.8 to 24.0)         | 10.5<br>(6.0 to 22.9)         | 3.8<br>(1.2 to 6.49)             | 3.9<br>(6.2 to 14.3)          | 5.7<br>(7.0 to 15.8)         | 9.7<br>(1.26 to 17.2)            | 22.1<br>(14.4 to 31.3)        | 19.9<br>(13.0 to 28.3)        | 9.8<br>(18.22 to 1.12)         |                        |
| Uncorrected refractive error       | 78.7<br>(44.8 to 129.8)        | 98.3<br>(50.3 to 149.6)       | 12.7<br>(4.49 to 21.8)        | 12.7<br>(7.1 to 22.0)          | 12.7<br>(7.1 to 22.0)          | 12.7<br>(-14.70 to -0.39)        | 12.7<br>(2.1 to 26.7)        | 12.7<br>(25.9 to 82.0)        | 12.7<br>(5.89 to 36.40)       | 12.7<br>(83.8 to 227.3)        | 12.7<br>(77.8 to 242.7)       | 12.7<br>(1.398 to 5.45)          | 12.7<br>(22.8 to 61.1)        | 12.7<br>(24.2 to 61.1)       | 12.7<br>(-3.17 to 14.50)         | 12.7<br>(68.8 to 192.8)       | 12.7<br>(62.4 to 179.2)       | 12.7<br>(16.7 to 4.78)         |                        |
| Age-related and other hearing loss | 230.7<br>(153.0 to 329.0)      | 283.3<br>(187.4 to 401.7)     | 21.7<br>(15.20 to 28.63)      | 21.7<br>(23.9 to 49.92)        | 21.7<br>(216.1 to 466.4)       | 21.7<br>(-137.80 to -1.19)       | 21.7<br>(80.1 to 171.2)      | 21.7<br>(103.1 to 218.1)      | 21.7<br>(21.0 to 38.35)       | 21.7<br>(404.4 to 633.1)       | 21.7<br>(288.4 to 576.8)      | 21.7<br>(1463.1 to -2.07)        | 21.7<br>(71.6 to 186.1)       | 21.7<br>(81.9 to 184.0)      | 21.7<br>(58.96 to 22.00)         | 21.7<br>(17.6 to 40.12)       | 21.7<br>(166.0 to 284.5)      | 21.7<br>(1.12 to 61.9)         |                        |
| Other vision loss                  | 7.2 to 10.5<br>(2.0 to 13.2)   | 10.8 to 15.0<br>(6.0 to 17.3) | 11.8 to 24.7<br>(3.1 to 17.3) | 11.8 to 24.7<br>(11.8 to 24.7) | 11.8 to 24.7<br>(11.8 to 24.7) | 11.8 to 24.7<br>(-11.8 to -24.7) | 11.8 to 24.7<br>(8.1 to 6.7) | 11.8 to 24.7<br>(11.8 to 6.7) | 11.8 to 24.7<br>(8.9 to 19.1) | 11.8 to 24.7<br>(12.9 to 26.8) | 11.8 to 24.7<br>(8.9 to 19.1) | 11.8 to 24.7<br>(37.95 to 15.95) | 11.8 to 24.7<br>(8.9 to 19.1) | 11.8 to 24.7<br>(2.9 to 6.6) | 11.8 to 24.7<br>(30.27 to 15.95) | 11.8 to 24.7<br>(7.1 to 15.8) | 11.8 to 24.7<br>(8.9 to 19.1) | 11.8 to 24.7<br>(1.12 to 61.9) |                        |
| Other sense organ diseases         | 30.3<br>(18.0 to 50.3)         | 34.5<br>(21.0 to 50.3)        | 13.8<br>(10.92 to 16.65)      | 13.8<br>(38.4 to 64.71)        | 13.8<br>(38.4 to 64.71)        | 13.8<br>(-2.03 to 17.9)          | 13.8<br>(2.03 to 17.9)       | 13.8<br>(12.0 to 17.9)        | 13.8<br>(12.0 to 17.9)        | 13.8<br>(12.0 to 17.9)         | 13.8<br>(12.0 to 17.9)        | 13.8<br>(12.0 to 17.9)           | 13.8<br>(12.0 to 17.9)        | 13.8<br>(12.0 to 17.9)       | 13.8<br>(12.0 to 17.9)           | 13.8<br>(12.0 to 17.9)        | 13.8<br>(12.0 to 17.9)        | 13.8<br>(12.0 to 17.9)         | 13.8<br>(12.0 to 17.9) |
| Oral disorders                     | 174.0<br>(109.0 to 256.3)      | 174.0<br>(120.0 to 284.1)     | 8.6<br>(5.8 to 13.79)         | 8.6<br>(181.9 to 433.1)        | 8.6<br>(165.1 to 401.4)        | 8.6<br>(-11.84 to -5.32)         | 8.6<br>(46.5 to 112.9)       | 8.6<br>(54.2 to 131.4)        | 8.6<br>(11.16 to 21.18)       | 8.6<br>(17.1 to 42.6)          | 8.6<br>(15.8 to 39.2)         | 8.6<br>(12.69 to 4.41)           | 8.6<br>(6.7 to 14.0)          | 8.6<br>(6.3 to 15.2)         | 8.6<br>(10.18 to 6.0)            | 8.6<br>(189.1 to 44.3)        | 8.6<br>(17.2 to 41.1)         | 8.6<br>(12.2 to 4.51)          |                        |
| Deciduous caries                   | 0.4<br>(0.2 to 0.8)            | 0.4<br>(0.5 to 3.0)           | 0.4<br>(0.5 to 3.0)           | 0.4<br>(0.5 to 3.0)            | 0.4<br>(0.5 to 3.0)            | 0.4<br>(-1.79 to 0.54)           | 0.4<br>(0.1 to 0.4)          | 0.4<br>(0.1 to 0.4)           | 0.4<br>(0.1 to 0.4)           | 0.4<br>(0.6 to 2.4)            | 0.4<br>(0.6 to 2.4)           | 0.4<br>(0.6 to 2.4)              | 0.4<br>(0.1 to 0.4)           | 0.4<br>(0.6 to 2.4)          | 0.4<br>(0.1 to 0.4)              | 0.4<br>(0.5 to 2.2)           | 0.4<br>(0.5 to 2.2)           | 0.4<br>(0.5 to 2.2)            | 0.4<br>(0.5 to 2.2)    |
| Permanent caries                   | 10.6<br>(4.8 to 16.3)          | 12.0<br>(5.0 to 22.9)         | 13.4<br>(10.1 to 18.43)       | 12.0<br>(10.1 to 42.5)         | 12.0<br>(10.1 to 42.5)         | 12.0<br>(-1.13 to 5.77)          | 12.0<br>(2.4 to 10.3)        | 12.0<br>(2.8 to 11.3)         | 12.0<br>(4.2 to 13.99)        | 12.0<br>(10.0 to 43.0)         | 12.0<br>(10.4 to 43.5)        | 12.0<br>(7.13 to 10.02)          | 12.0<br>(2.5 to 10.5)         | 12.0<br>(2.7 to 11.6)        | 12.0<br>(5.00 to 12.40)          | 12.0<br>(10.0 to 42.8)        | 12.0<br>(10.0 to 43.3)        | 12.0<br>(5.4 to 15.48)         |                        |
| Periodontal diseases               | 31.4<br>(12.6 to 64.3)         | 39.8<br>(15.7 to 81.8)        | 26.5<br>(19.54 to 35.85)      | 26.5<br>(22.5 to 115.1)        | 26.5<br>(23.1 to 120.0)        | 26.5<br>(-2.35 to 10.65)         | 26.5<br>(7.0 to 36.2)        | 26.5<br>(8.8 to 46.0)         | 26.5<br>(15.09 to 38.88)      | 26.5<br>(26.4 to 137.3)        | 26.5<br>(26.6 to 139.0)       | 26.5<br>(7.85 to 10.69)          | 26.5<br>(5.6 to 28.1)         | 26.5<br>(7.0 to 36.2)        | 26.5<br>(19.28 to 38.44)         | 26.5<br>(19.0 to 95.6)        | 26.5<br>(19.8 to 102.4)       | 26.5<br>(0.48 to 15.06)        |                        |
| Edentulous and severe tooth loss   | 105.9<br>(71.0 to 143.1)       | 109.1<br>(74.0 to 150.0)      | 1.8<br>(17.6 to 145.0)        | 1.8<br>(106.4 to 216.7)        | 1.8<br>(106.4 to 216.7)        | 1.8<br>(-1.75 to 9.42)           | 1.8<br>(31.5 to 64.1)        | 1.8<br>(27.6 to 56.8)         | 1.8<br>(5.30 to 20.61)        | 1.8<br>(28.1 to 203.5)         | 1.8<br>(28.4 to 168.3)        | 1.8<br>(22.32 to 11.03)          | 1.8<br>(42.4 to 88.4)         | 1.8<br>(8.36 to 4.02)        | 1.8<br>(114.6 to 231.9)          | 1.8<br>(9.8 to 154.8)         | 1.8<br>(114.6 to 231.9)       | 1.8<br>(-21.67 to 10.93)       |                        |
| Other oral disorders               | 26.2<br>(16.0 to 38.7)         | 29.9<br>(18.0 to 44.5)        | 13.9<br>(10.84 to 17.34)      | 13.9<br>(32.9 to 76.8)         | 13.9<br>(32.9 to 76.8)         | 13.9<br>(-2.56 to 2.99)          | 13.9<br>(7.0 to 16.8)        | 13.9<br>(8.0 to 18.8)         | 13.9<br>(10.92 to 18.80)      | 13.9<br>(28.5 to 66.3)         | 13.9<br>(28.4 to 66.3)        | 13.9<br>(1.91 to 13.87)          | 13.9<br>(0.6 to 15.2)         | 13.9<br>(0.6 to 15.2)        | 13.9<br>(12.12 to 13.08)         | 13.9<br>(37.2 to 87.2)        | 13.9<br>(37.2 to 87.2)        | 13.9<br>(3.15 to 10.08)        |                        |
| Sudden infant death syndrome       | 10.2<br>(3.0 to 17.8)          | 10.2<br>(12.0 to 36.6)        | 28.4<br>(83.19 to 23.74)      | 28.4<br>(93.4 to 223.6)        | 28.4<br>(33.4 to 101.5)        | 28.4<br>(-83.54 to -25.32)       | 28.4<br>(18.0 to 46.6)       | 28.4<br>(7.1 to 20.9)         | 28.4<br>(83.01 to 27.57)      | 28.4<br>(89.4 to 257.9)        | 28.4<br>(88.6 to 113.1)       | 28.4<br>(43.37 to 29.99)         | 28.4<br>(11.0 to 35.2)        | 28.4<br>(4.5 to 18.9)        | 28.4<br>(43.95 to -8.73)         | 28.4<br>(64.1 to 204.2)       | 28.4<br>(25.7 to 107.3)       | 28.4<br>(44.28 to 10.63)       |                        |
| Injuries                           | 1266.2<br>(1036.4 to 1322.9)   | 856.6<br>(708.5 to 985.1)     | 286.4<br>(193.4 to 22.74)     | 286.4<br>(1133.9 to 1484.2)    | 286.4<br>(1133.9 to 1484.2)    | 286.4<br>(-84.54 to -36.73)      | 286.4<br>(657.9 to 811.3)    | 286.4<br>(453.1 to 611.2)     | 286.4<br>(32.67 to 22.36)     | 286.4<br>(269.1 to 3290.8)     | 286.4<br>(154.8 to 2028.1)    | 286.4<br>(43.32 to 36.36)        | 286.4<br>(37.0 to 51.4)       | 286.4<br>(23.2 to 37.6)      | 286.4<br>(117.1 to 1535.5)       | 286.4<br>(66.8 to 951.4)      | 286.4<br>(66.8 to 951.4)      | 286.4<br>(-4.15 to 35.08)      |                        |
| Transport injuries                 | 298.1<br>(175.4 to 521.9)      | 142.5<br>(127.8 to 158.5)     | 52.2<br>(55.21 to 48.87)      | 52.2<br>(579.3 to 688.7)       | 52.2<br>(263.0 to 289.3)       | 52.2<br>(-60.50 to -54.48)       | 52.2<br>(218.4 to 245.3)     | 52.2<br>(98.6 to 122.9)       | 52.2<br>(55.18 to 47.79)      | 52.2<br>(901.0 to 1035.2)      | 52.2<br>(80.2 to 458.7)       | 52.2<br>(40.59 to 35.89)         | 52.2<br>(59.3 to 77.5)        | 52.2<br>(27.6 to 37.6)       | 52.2<br>(57.11 to 49.21)         | 52.2<br>(240.1 to 412.3)      | 52.2<br>(100.2 to 116.1)      | 52.2<br>(42.08 to 54.69)       |                        |
| Road injuries                      | 285.5<br>(263.8 to 307.8)      | 8.2<br>(116.2 to 142.3)       | 1.7<br>(47.61 to 51.50)       | 1.7<br>(156.7 to 641.3)        | 1.7<br>(218.4 to 264.4)        | 1.7<br>(-62.30 to -56.35)        | 1.7<br>(202.9 to 234.7)      | 1.7<br>(89.5 to 110.6)        | 1.7<br>(57.43 to 50.65)       | 1.7<br>(864.1 to 989.8)        | 1.7<br>(339.2 to 415.2)       | 1.7<br>(66.73 to 55.86)          | 1.7<br>(56.7 to 74.1)         | 1.7<br>(25.2 to 34.5)        | 1.7<br>(59.18 to 51.49)          | 1.7<br>(28.0 to 299.7)        | 1.7<br>(92.8 to 125.9)        | 1.7<br>(43.77 to 24.64)        |                        |
| Pedestrian road injuries           | 66.2<br>(2.0 to 82.3)          | 26.1<br>(21.1 to 34.3)        | 40.7<br>(43.42 to 55.15)      | 40.7<br>(37.7 to 62.8)         | 40.7<br>(37.7 to 62.8)         | 40.7<br>(-1.80 to 17.33)         | 40.7<br>(13.4 to 62.5)       | 40.7<br>(13.4 to 62.5)        | 40.7<br>(-62.90 to 41.34)     | 40.7<br>(14.5 to 120.3)        | 40.7<br>(15.1 to 108.6)       | 40.7<br>(47.9 to 30.45)          | 40.7<br>(14.7 to 29.9)        | 40.7<br>(5.3 to 0.0)         | 40.7<br>(47.9 to 30.45)          | 40.7<br>(97.8 to 9.69)        | 40.7<br>(18.2 to 119.6)       | 40.7<br>(17.53 to 63.08)       |                        |
| Cyclist road injuries              | 20.4<br>(16.8 to 24.2)         | 8.2<br>(6.5 to 9.8)           | 59.9<br>(44.6 to 55.10)       | 59.9<br>(36.0 to 53.3)         | 59.9<br>(36.0 to 53.3)         | 59.9<br>(-12.0 to 19.6)          | 59.9<br>(12.0 to 19.6)       | 59.9<br>(4.7 to 7.8)          | 59.9<br>(-66.00 to 54.35)     | 59.9<br>(50.0 to 87.0)         | 59.9<br>(32.8 to 29.8)        | 59.9<br>(-71.27 to 60.92)        | 59.9<br>(3.7 to 5.5)          | 59.9<br>(1.4 to 2.4)         | 59.9<br>(43.89 to 57.88)         | 59.9<br>(15.4 to 22.8)        | 59.9<br>(5.3 to 9.0)          | 59.9<br>(47.80 to 56.51)       |                        |
| Motorcycle road injuries           | 44.1 to 68.8<br>(41.1 to 68.8) | 49.3<br>(18.3 to 29.7)        | 50.9<br>(9.9 to 29.7)         | 50.9<br>(34.8 to 58.3)         | 50.9<br>(34.8 to 58.3)         | 50.9<br>(-65.91 to -58.82)       | 50.9<br>(39.0 to 63.6)       | 50.9<br>(17.0 to 28.2)        | 50.9<br>(61.90 to 48.92)      | 50.9<br>(163.8 to 267.9)       | 50.9<br>(64.7 to 109.1)       | 50.9<br>(65.50 to 43.62)         | 50.9<br>(3.0 to 7.5)          | 50.9<br>(0.8 to 2.5)         | 50.9<br>(74.28 to 43.62)         | 50.9<br>(3.0 to 7.5)          | 50.9<br>(8.6 to 8.6)          | 50.9<br>(12.0 to 31.2)         | 50.9<br>(3.0 to 7.5)   |
| Motor vehicle road injuries        | 141.2<br>(121.7 to 159.8)      | 69.3<br>(58.0 to 78.3)        | 50.9<br>(54.50 to 41.28)      | 50.9<br>(252.4 to 330.4)       | 50.9<br>(252.4 to 330.4)       | 50.9<br>(-55.70 to -45.13)       | 50.9<br>(110.7 to 146.0)     | 50.9<br>(85.0 to 65.1)        | 50.9<br>(55.70 to 45.60)      | 50.9<br>(58.0 to 390.2)        | 50.9<br>(15.0 to 43.0)        | 50.9<br>(40.33 to 60.53)         | 50.9<br>(15.3 to 33.6)        | 50.9<br>(5.5 to 10.0)        | 50.9<br>(54.56 to 45.34)         | 50.9<br>(23.3 to 177.3)       | 50.9<br>(55.7 to 30.0)        | 50.9<br>(53.25 to 50.40)       |                        |
| Other road injuries                | 2.0<br>(1.3 to 2.4)            | 0.7<br>(0.6 to 1.1)           | 43.0<br>(49.21 to 45.82)      | 43.0<br>(2.7 to 5.0)           | 43.0<br>(2.7 to 5.0)           | 43.0<br>(-73.72 to 53.01)        | 43.0<br>(1.0 to 1.2)         | 43.0<br>(0.2 to 0.5)          | 43.0<br>(-79.61 to 57.80)     | 43.0<br>(2.7 to 6.6)           | 43.0<br>(1.2 to 2.0)          | 43.0<br>(42.11 to 63.31)         | 43.0<br>(0.6 to 1.0)          | 43.0<br>(0.3 to 0.6)         | 43.0<br>(57.28 to 46.38)         | 43.0<br>(2.2 to 4.1)          | 43.0<br>(0.9 to 2.1)          | 43.0<br>(42.11 to 63.31)       |                        |
| Other transport injuries           | 12.4<br>(10.7 to 14.7)         | 12.4<br>(10.7 to 14.7)        | 12.4<br>(10.7 to 14.7)        | 12.4<br>(10.7 to 14.7)         | 12.4<br>(10.7 to 14.7)         | 12.4<br>(10.7 to 14.7)           | 12.4<br>(10.7 to 14.7)       | 12.4<br>(10.7 to 14.7)        | 12.4<br>(10.7 to 14.7)        | 12.4<br>(10.7 to 14.7)         | 12.4<br>(10.7 to 14.7)        | 12.4<br>(10.7 to 14.7)           | 12.4<br>(10.7 to 14.7)        | 12.4<br>(10.7 to 14.7)       | 12.4<br>(10.7 to 14.7)           | 12.4<br>(10.7 to 14.7)        | 12.4<br>(10.7 to 14.7)        | 12.4<br>(10.7 to 14.7)         | 12.4<br>(10.7 to 14.7) |
| Unintentional injuries             | 600.5<br>(511.4 to 752.7)      | 538.1<br>(428.0 to 648.1)     | 13.3<br>(21.16 to 30.78)      | 13.3<br>(875.1 to 158.7)       | 13.3<br>(875.1 to 158.7)       | 13.3<br>(-13.07 to 152.57)       | 13.3<br>(26.2 to 101.1)      | 13.3<br>(150.9 to 307.7)      | 13.3<br>(13.07 to 152.57)     | 13.3<br>(740.2 to 540.0)       | 13.3<br>(210.9 to 676.2)      | 13.3<br>(22.06 to 20.51)         | 13.3<br>(18.0 to 21.2)        | 13.3<br>(30.09 to 10.49)     | 13.3<br>(30.09 to 10.49)         | 13.3<br>(64.0 to 377.5)       | 13.3<br>(64.0 to 377.5)       | 13.3<br>(37.66 to 22.59)       |                        |
| Falls                              | 428.8<br>(388.7 to 530.7)      | 390.6<br>(296.3 to 499.7)     | 26.1<br>(-20.43 to 2.17)      | 26.1<br>(28.0 to 82.8)         | 26.1<br>(37.3 to 63.9)         | 26.1<br>(-34.70 to 17.59)        | 26.1<br>(147.6 to 225.5)     | 26.1<br>(158.8 to 251.9)      | 26.1<br>(-35.11 to 16.67)     | 26.1<br>(558.1 to 867.9)       | 26.1<br>(438.4 to 734.4)      | 26.1<br>(-28.87 to 30.20)        | 26.1<br>(194.1 to 307.0)      | 26.1<br>(145.7 to 250.2)     | 26.1<br>(-33.34 to 45.7)         | 26.1<br>(47.1 to 70.2)        | 26.1<br>(304.4 to 58.1)       | 26.1<br>(31.3 to 22.60)        |                        |
| Drowning                           | 56.8<br>(18.8 to 19.4)         | 53.2<br>(7.7 to 11.9)         | 42.9<br>(50.32 to 32.53)      | 42.9<br>(31.9 to 44.9)         | 42.9<br>(31.9 to 44.9)         | 42.9<br>(-56.06 to 39.73)        | 42.9<br>(16.0 to 15.6)       | 42.9<br>(10.4 to 15.6)        | 42.9<br>(-50.70 to 31.54)     | 42.9<br>(47.9 to 72.1)         | 42.9<br>(24.3 to 39.7)        | 42.9<br>(55.89 to 39.05)         | 42.9<br>(3.0 to 4.3)          | 42.9<br>(1.8 to 10.7)        | 42.9<br>(55.82 to 32.59)         | 42.9<br>(1.8 to 10.7)         | 42.9<br>(1.8 to 10.7)         | 42.9<br>(1.8 to 10.7)          |                        |
| Fire, heat, and hot substances     | 28.6<br>(12.8 to 33.4)         | 16.3<br>(12.8 to 33.4)        | 42.9<br>(51.20 to 21.48)      | 42.9<br>(48.3 to 67.8)         | 42.9<br>(48.3 to 67.8)         | 42.9<br>(-59.20 to 36.12)        | 42.9<br>(11.3 to 31.0)       | 42.9<br>(17.3 to 31.0)        | 42.9<br>(-60.70 to 36.12)     | 42.9<br>(56.6 to 83.0)         | 42.9<br>(28.0 to 64.6)        | 42.9<br>(-61.00 to 36.12)        | 42.9<br>(0.6 to 10.5)         | 42.9<br>(0.6 to 10.5)        | 42.9<br>(42.90 to 25.91)         | 42.9<br>(16.5 to 15.7)        | 42.9<br>(17.1 to 12.38)       | 42.9<br>(41.06 to 30.43)       |                        |
| Poisonings                         | 18.5<br>(11.6 to 20.5)         | 6.2<br>(5.0 to 11.2)          | 64.8<br>(74.78 to 27.13)      | 64.8<br>(21.9 to 42.4)         | 64.8<br>(21.9 to 42.4)         | 64.8<br>(-6.8 to 14.1)           | 64.8<br>(9.1 to 20.0)        | 64.8<br>(6.8 to 14.1)         | 64.8<br>(-78.91 to 29.65)     | 64.8<br>(11.0 to 29.2)         | 64.8<br>(1.0 to 2.0)          | 64.8<br>(81.00 to 39.53)         | 64.8<br>(1.1 to 6.1)          | 64.8<br>(1.2 to 2.4)         | 64.8<br>(66.62 to 13.69)         | 64.8<br>(12.4 to 24.7)        | 64.8<br>(6.7 to 15.8)         | 64.8<br>(71.10 to 26.09)       |                        |
| Exposure to mechanical forces      | 1.4<br>(45.5 to 71.2)          | 0.7<br>(41.9 to 67.6)         | 3.0<br>(17.15 to 0.13)        | 3.0<br>(92.1 to 142.1)         | 3.0<br>(75.5 to 136.9)         | 3.0<br>(-28.88 to 21.36)         | 3.0<br>(39.0 to 61.0)        | 3.0<br>(32.7 to 52.7)         | 3.0<br>(-23.02 to 4.71)       | 3.0<br>(160.3 to 248.1)        | 3.0<br>(117.9 to 184.1)       | 3.0<br>(34.72 to 20.55)          | 3.0<br>(6.6 to 10.5)          |                              |                                  |                               |                               |                                |                        |



Web Table 8: DALYs (in thousands) attributable-risk factors or risk factor clusters and median percent change of age-standardized DALYs PAFs in England for both sexes, males, and females.

|                                                           | 1990 DALYs<br>(in thousands) Male | 2013 DALYs<br>(in thousands) Male | median percent change<br>of age-standardized DALYs<br>PAF Male | 1990 DALYs<br>(in thousands) Female | 2013 DALYs<br>(in thousands) Female | median percent change<br>of age-standardized DALYs<br>PAF Female | 1990 DALYs<br>(in thousands)<br>Both sexes | 2013 DALYs<br>(in thousands)<br>Both sexes | median percent change<br>of age-standardized DALYs<br>PAF<br>Both sexes |
|-----------------------------------------------------------|-----------------------------------|-----------------------------------|----------------------------------------------------------------|-------------------------------------|-------------------------------------|------------------------------------------------------------------|--------------------------------------------|--------------------------------------------|-------------------------------------------------------------------------|
| All risk factors                                          | 4,178<br>(3,942 - 4,431)          | 3,032<br>(2,733 - 3,363)          | -19.02%<br>(-21.32% - -16.90%)                                 | 3,086<br>(2,849 - 3,338)            | 2,385<br>(2,122 - 2,670)            | -15.60%<br>(-18.09% - -12.64%)                                   | 7,264<br>(6,793 - 7,759)                   | 5,417<br>(4,872 - 5,987)                   | -17.80%<br>(-19.56% - -16.14%)                                          |
| Environmental risks                                       | 654<br>(598 - 720)                | 421<br>(360 - 480)                | -27.37%<br>(-36.72% - -19.04%)                                 | 350<br>(319 - 381)                  | 227<br>(195 - 260)                  | -26.79%<br>(-33.14% - -20.29%)                                   | 1,005<br>(927 - 1,092)                     | 648<br>(565 - 730)                         | -27.99%<br>(-34.49% - -22.36%)                                          |
| Unsafe water, sanitation, and handwashing                 | 2<br>(1 - 2)                      | 3<br>(2 - 4)                      | 104.78%<br>(67.07% - 142.24%)                                  | 1<br>(1 - 2)                        | 4<br>(3 - 5)                        | 113.28%<br>(66.78% - 165.72%)                                    | 3<br>(2 - 4)                               | 7<br>(5 - 9)                               | 107.84%<br>(70.75% - 149.71%)                                           |
| Unsafe water source                                       |                                   |                                   |                                                                |                                     |                                     |                                                                  |                                            |                                            |                                                                         |
| Unsafe sanitation                                         |                                   |                                   |                                                                |                                     |                                     |                                                                  |                                            |                                            |                                                                         |
| No handwashing with soap                                  | 2<br>(1 - 2)                      | 3<br>(2 - 4)                      | 104.78%<br>(67.07% - 142.24%)                                  | 1<br>(1 - 2)                        | 4<br>(3 - 5)                        | 113.28%<br>(66.78% - 165.72%)                                    | 3<br>(2 - 4)                               | 7<br>(5 - 9)                               | 107.84%<br>(70.75% - 149.71%)                                           |
| Air pollution                                             | 400<br>(388 - 411)                | 141<br>(128 - 155)                | -62.66%<br>(-65.50% - -59.75%)                                 | 244<br>(227 - 254)                  | 101<br>(90 - 113)                   | -57.81%<br>(-61.82% - -52.75%)                                   | 644<br>(620 - 662)                         | 242<br>(220 - 265)                         | -61.22%<br>(-64.06% - -58.24%)                                          |
| Ambient particulate matter pollution                      | 397<br>(385 - 409)                | 132<br>(119 - 146)                | -64.82%<br>(-67.61% - -61.98%)                                 | 242<br>(225 - 252)                  | 93<br>(83 - 106)                    | -60.75%<br>(-64.71% - -55.66%)                                   | 639<br>(616 - 658)                         | 225<br>(204 - 247)                         | -63.63%<br>(-66.39% - -60.55%)                                          |
| Household air pollution from solid fuels                  |                                   |                                   |                                                                |                                     |                                     |                                                                  |                                            |                                            |                                                                         |
| Ambient ozone pollution                                   | 3<br>(1 - 4)                      | 9<br>(7 - 13)                     | 296.55%<br>(114.90% - 663.72%)                                 | 2<br>(1 - 3)                        | 8<br>(5 - 10)                       | 369.39%<br>(150.14% - 803.88%)                                   | 4<br>(2 - 7)                               | 17<br>(12 - 23)                            | 334.01%<br>(141.02% - 738.00%)                                          |
| Other environmental risks                                 | 48<br>(26 - 79)                   | 25<br>(14 - 40)                   | -44.04%<br>(-61.29% - -15.88%)                                 | 28<br>(14 - 48)                     | 19<br>(10 - 31)                     | -27.07%<br>(-48.68% - 12.79%)                                    | 76<br>(41 - 125)                           | 44<br>(24 - 71)                            | -38.23%<br>(-56.14% - -7.59%)                                           |
| Residential radon                                         | 24<br>(13 - 38)                   | 16<br>(9 - 27)                    | -24.78%<br>(-58.65% - 26.26%)                                  | 11<br>(6 - 17)                      | 12<br>(6 - 19)                      | 17.72%<br>(-36.24% - 95.83%)                                     | 34<br>(19 - 55)                            | 28<br>(16 - 44)                            | -11.53%<br>(-51.09% - 49.22%)                                           |
| Lead exposure                                             | 24<br>(7 - 53)                    | 9<br>(2 - 21)                     | -65.02%<br>(-73.50% - -56.07%)                                 | 18<br>(6 - 37)                      | 7<br>(2 - 17)                       | -61.43%<br>(-70.46% - -49.84%)                                   | 42<br>(13 - 90)                            | 16<br>(4 - 38)                             | -63.77%<br>(-71.43% - -54.95%)                                          |
| Occupational risks                                        | 233<br>(184 - 303)                | 270<br>(211 - 324)                | 32.80%<br>(-1.42% - 63.11%)                                    | 84<br>(64 - 108)                    | 108<br>(83 - 136)                   | 33.36%<br>(10.58% - 58.04%)                                      | 317<br>(253 - 401)                         | 377<br>(299 - 455)                         | 30.09%<br>(3.65% - 52.61%)                                              |
| Occupational asthmagens                                   | 8<br>(6 - 11)                     | 8<br>(5 - 11)                     | 9.55%<br>(-5.47% - 25.57%)                                     | 4<br>(3 - 5)                        | 4<br>(3 - 6)                        | 21.91%<br>(1.10% - 42.79%)                                       | 12<br>(9 - 16)                             | 12<br>(8 - 17)                             | 10.61%<br>(0.59% - 22.52%)                                              |
| Occupational particulate matter, gases, and fumes         | 17<br>(13 - 23)                   | 15<br>(10 - 21)                   | -2.00%<br>(-12.39% - 8.18%)                                    | 3<br>(2 - 4)                        | 3<br>(2 - 5)                        | 13.74%<br>(-1.58% - 29.73%)                                      | 21<br>(15 - 27)                            | 18<br>(13 - 25)                            | -2.22%<br>(-11.28% - 6.26%)                                             |
| Occupational noise                                        | 12<br>(6 - 20)                    | 12<br>(6 - 21)                    | 14.46%<br>(-4.56% - 31.18%)                                    | 3<br>(1 - 5)                        | 4<br>(2 - 8)                        | 31.19%<br>(3.82% - 62.30%)                                       | 15<br>(8 - 26)                             | 16<br>(8 - 28)                             | 13.36%<br>(-2.67% - 26.93%)                                             |
| Occupational injuries                                     | 46<br>(23 - 83)                   | 50<br>(26 - 85)                   | 46.04%<br>(-44.69% - 212.97%)                                  | 24<br>(12 - 42)                     | 29<br>(15 - 46)                     | 36.85%<br>(-41.93% - 166.20%)                                    | 71<br>(42 - 112)                           | 79<br>(48 - 118)                           | 33.50%<br>(-31.98% - 135.50%)                                           |
| Occupational ergonomic factors                            | 67<br>(45 - 94)                   | 72<br>(49 - 100)                  | 30.11%<br>(16.44% - 45.80%)                                    | 38<br>(26 - 54)                     | 51<br>(34 - 72)                     | 43.57%<br>(29.59% - 58.55%)                                      | 105<br>(72 - 148)                          | 123<br>(83 - 171)                          | 32.75%<br>(22.39% - 44.91%)                                             |
| Occupational carcinogens                                  | 82<br>(64 - 134)                  | 117<br>(72 - 142)                 | 57.41%<br>(-23.89% - 100.23%)                                  | 14<br>(11 - 22)                     | 22<br>(14 - 27)                     | 63.02%<br>(-8.41% - 101.57%)                                     | 96<br>(77 - 151)                           | 139<br>(90 - 165)                          | 58.00%<br>(-17.57% - 98.08%)                                            |
| Occupational exposure to asbestos                         | 74<br>(55 - 127)                  | 113<br>(67 - 137)                 | 70.90%<br>(-23.33% - 121.17%)                                  | 11<br>(9 - 20)                      | 19<br>(11 - 25)                     | 77.85%<br>(-11.18% - 126.27%)                                    | 85<br>(65 - 141)                           | 132<br>(83 - 158)                          | 72.16%<br>(-16.78% - 120.57%)                                           |
| Occupational exposure to trichloroethylene                | 0<br>(0 - 0)                      | 0<br>(0 - 0)                      | 5.04%<br>(-8.33% - 18.87%)                                     | 0<br>(0 - 0)                        | 0<br>(0 - 0)                        | 9.31%<br>(-6.72% - 26.89%)                                       | 0<br>(0 - 0)                               | 0<br>(0 - 0)                               | 3.95%<br>(-8.91% - 15.40%)                                              |
| Occupational exposure to arsenic                          | 0<br>(0 - 0)                      | 0<br>(0 - 0)                      | -40.24%<br>(-48.83% - -32.28%)                                 | 0<br>(0 - 0)                        | 0<br>(0 - 0)                        | 1.44%<br>(-16.36% - 17.71%)                                      | 0<br>(0 - 0)                               | 0<br>(0 - 0)                               | -34.77%<br>(-42.43% - -26.99%)                                          |
| Occupational exposure to benzene                          | 0<br>(0 - 0)                      | 0<br>(0 - 0)                      | 18.68%<br>(-0.97% - 31.80%)                                    | 0<br>(0 - 0)                        | 0<br>(0 - 1)                        | 9.41%<br>(-10.18% - 27.66%)                                      | 1<br>(1 - 1)                               | 1<br>(1 - 1)                               | 14.10%<br>(-0.29% - 26.86%)                                             |
| Occupational exposure to beryllium                        | 0<br>(0 - 0)                      | 0<br>(0 - 0)                      | -28.09%<br>(-38.69% - -18.55%)                                 | 0<br>(0 - 0)                        | 0<br>(0 - 0)                        | 10.86%<br>(-3.54% - 23.48%)                                      | 0<br>(0 - 0)                               | 0<br>(0 - 0)                               | -13.50%<br>(-23.06% - -5.03%)                                           |
| Occupational exposure to cadmium                          | 0<br>(0 - 0)                      | 0<br>(0 - 0)                      | -38.31%<br>(-47.08% - -30.41%)                                 | 0<br>(0 - 0)                        | 0<br>(0 - 0)                        | 7.46%<br>(-9.73% - 21.84%)                                       | 0<br>(0 - 0)                               | 0<br>(0 - 0)                               | -31.41%<br>(-39.49% - -23.54%)                                          |
| Occupational exposure to chromium                         | 0<br>(0 - 0)                      | 0<br>(0 - 0)                      | -41.12%<br>(-49.17% - -34.06%)                                 | 0<br>(0 - 0)                        | 0<br>(0 - 0)                        | 9.33%<br>(-8.01% - 22.61%)                                       | 0<br>(0 - 0)                               | 0<br>(0 - 0)                               | -32.13%<br>(-39.02% - -25.18%)                                          |
| Occupational exposure to diesel engine exhaust            | 3<br>(3 - 4)                      | 2<br>(1 - 2)                      | -38.65%<br>(-47.28% - -30.39%)                                 | 1<br>(1 - 1)                        | 1<br>(0 - 1)                        | 3.02%<br>(-15.61% - 19.89%)                                      | 4<br>(3 - 4)                               | 2<br>(2 - 3)                               | -32.25%<br>(-39.71% - -24.66%)                                          |
| Occupational exposure to second-hand smoke                | 3<br>(2 - 3)                      | 2<br>(1 - 2)                      | -32.06%<br>(-40.79% - -23.90%)                                 | 1<br>(1 - 1)                        | 1<br>(1 - 1)                        | 22.89%<br>(4.30% - 36.60%)                                       | 4<br>(3 - 4)                               | 3<br>(2 - 3)                               | -17.04%<br>(-24.50% - -9.11%)                                           |
| Occupational exposure to formaldehyde                     | 0<br>(0 - 0)                      | 0<br>(0 - 0)                      | -6.55%<br>(-20.16% - 5.00%)                                    | 0<br>(0 - 0)                        | 0<br>(0 - 0)                        | -5.36%<br>(-19.54% - 10.03%)                                     | 0<br>(0 - 0)                               | 0<br>(0 - 0)                               | -8.04%<br>(-18.90% - 1.09%)                                             |
| Occupational exposure to nickel                           | 1<br>(1 - 1)                      | 0<br>(0 - 1)                      | -43.43%<br>(-52.01% - -35.73%)                                 | 0<br>(0 - 0)                        | 0<br>(0 - 0)                        | 0.49%<br>(-17.23% - 15.75%)                                      | 1<br>(1 - 1)                               | 1<br>(0 - 1)                               | -37.28%<br>(-45.40% - -29.23%)                                          |
| Occupational exposure to polycyclic aromatic hydrocarbons | 0<br>(0 - 1)                      | 0<br>(0 - 0)                      | -36.71%<br>(-45.47% - -28.63%)                                 | 0<br>(0 - 0)                        | 0<br>(0 - 0)                        | 12.40%<br>(-5.28% - 27.35%)                                      | 1<br>(0 - 1)                               | 0<br>(0 - 0)                               | -27.70%<br>(-35.59% - -19.41%)                                          |
| Occupational exposure to silica                           | 2<br>(2 - 2)                      | 1<br>(1 - 1)                      | -32.23%<br>(-41.42% - -23.69%)                                 | 0<br>(0 - 0)                        | 0<br>(0 - 0)                        | -6.14%<br>(-22.11% - 5.96%)                                      | 2<br>(2 - 2)                               | 1<br>(1 - 2)                               | -30.90%<br>(-39.21% - -22.67%)                                          |

|                                         |                          |                          |                                |                          |                          |                                |                          |                          |                                |
|-----------------------------------------|--------------------------|--------------------------|--------------------------------|--------------------------|--------------------------|--------------------------------|--------------------------|--------------------------|--------------------------------|
| Occupational exposure to sulfuric acid  | 0<br>(0 - 1)             | 0<br>(0 - 0)             | -33.21%<br>(-43.49% - -20.94%) | 0<br>(0 - 0)             | 0<br>(0 - 0)             | -4.38%<br>(-27.86% - 21.32%)   | 0<br>(0 - 1)             | 0<br>(0 - 0)             | -31.83%<br>(-41.79% - -19.76%) |
| Behavioral risks                        | 3,350<br>(3,162 - 3,524) | 2,248<br>(2,041 - 2,464) | -24.29%<br>(-27.12% - -21.44%) | 2,168<br>(2,013 - 2,322) | 1,566<br>(1,400 - 1,739) | -21.33%<br>(-24.45% - -17.81%) | 5,517<br>(5,190 - 5,829) | 3,814<br>(3,475 - 4,159) | -23.35%<br>(-25.68% - -20.99%) |
| Child and maternal malnutrition         | 77<br>(55 - 108)         | 79<br>(54 - 114)         | 33.56%<br>(25.12% - 42.03%)    | 76<br>(54 - 107)         | 75<br>(50 - 108)         | 13.44%<br>(2.00% - 23.10%)     | 152<br>(108 - 215)       | 154<br>(104 - 224)       | 22.61%<br>(14.46% - 30.25%)    |
| Childhood underweight                   | 0<br>(0 - 0)             | 0<br>(0 - 0)             | -41.94%<br>(-66.34% - -12.73%) | 0<br>(0 - 0)             | 0<br>(0 - 0)             | -58.97%<br>(-76.12% - -32.93%) | 0<br>(0 - 0)             | 0<br>(0 - 0)             | -51.54%<br>(-70.21% - -25.36%) |
| Suboptimal breastfeeding                | 8<br>(2 - 12)            | 3<br>(1 - 5)             | -41.11%<br>(-61.67% - -16.29%) | 6<br>(2 - 10)            | 2<br>(1 - 4)             | -51.27%<br>(-68.67% - -28.45%) | 14<br>(4 - 22)           | 6<br>(2 - 9)             | -46.63%<br>(-63.78% - -24.21%) |
| Discontinued breastfeeding              | 0<br>(0 - 0)             | 0<br>(0 - 0)             | 144.76%<br>(-71.89% - 827.84%) | 0<br>(0 - 0)             | 0<br>(0 - 0)             | 166.05%<br>(-67.71% - 920.78%) | 0<br>(0 - 0)             | 0<br>(0 - 0)             | 148.48%<br>(-68.96% - 879.04%) |
| Non-exclusive breastfeeding             | 8<br>(2 - 12)            | 3<br>(1 - 5)             | -41.11%<br>(-61.67% - -16.29%) | 6<br>(2 - 10)            | 2<br>(1 - 4)             | -51.27%<br>(-68.67% - -28.45%) | 14<br>(4 - 22)           | 6<br>(2 - 9)             | -46.63%<br>(-63.78% - -24.21%) |
| Iron deficiency                         | 69<br>(46 - 99)          | 76<br>(50 - 110)         | 43.54%<br>(37.35% - 50.73%)    | 69<br>(47 - 100)         | 72<br>(48 - 105)         | 21.26%<br>(8.96% - 30.16%)     | 138<br>(93 - 198)        | 148<br>(99 - 216)        | 31.42%<br>(23.93% - 38.01%)    |
| Vitamin A deficiency                    | 0<br>(0 - 0)             | 0<br>(0 - 0)             | -17.86%<br>(-60.85% - 44.26%)  | 0<br>(0 - 0)             | 0<br>(0 - 0)             | -17.05%<br>(-63.32% - 57.63%)  | 0<br>(0 - 0)             | 0<br>(0 - 0)             | -19.17%<br>(-61.07% - 34.15%)  |
| Zinc deficiency                         | 0<br>(0 - 0)             | 0<br>(0 - 0)             | -3.45%<br>(-55.97% - 110.22%)  | 0<br>(0 - 0)             | 0<br>(0 - 0)             | -1.94%<br>(-60.94% - 136.34%)  | 0<br>(0 - 1)             | 0<br>(0 - 0)             | -4.24%<br>(-57.55% - 112.75%)  |
| Tobacco smoke                           | 1,524<br>(1,404 - 1,648) | 847<br>(756 - 943)       | -40.99%<br>(-47.37% - -34.82%) | 856<br>(766 - 949)       | 612<br>(523 - 689)       | -26.79%<br>(-35.85% - -17.67%) | 2,380<br>(2,230 - 2,538) | 1,459<br>(1,338 - 1,595) | -36.09%<br>(-40.97% - -31.43%) |
| Smoking                                 | 1,480<br>(1,353 - 1,609) | 835<br>(744 - 933)       | -40.00%<br>(-46.59% - -33.44%) | 829<br>(734 - 925)       | 605<br>(517 - 682)       | -25.27%<br>(-34.80% - -15.47%) | 2,309<br>(2,152 - 2,471) | 1,440<br>(1,320 - 1,576) | -34.90%<br>(-40.00% - -29.85%) |
| Secondhand smoke                        | 44<br>(37 - 52)          | 11<br>(10 - 13)          | -72.73%<br>(-76.83% - -67.79%) | 27<br>(23 - 32)          | 7<br>(6 - 8)             | -73.43%<br>(-77.67% - -68.05%) | 71<br>(62 - 81)          | 18<br>(16 - 20)          | -73.33%<br>(-76.44% - -69.93%) |
| Alcohol and drug use                    | 473<br>(400 - 550)       | 531<br>(455 - 609)       | 34.80%<br>(21.75% - 45.42%)    | 301<br>(255 - 351)       | 257<br>(219 - 295)       | -5.92%<br>(-11.40% - -0.68%)   | 774<br>(658 - 894)       | 789<br>(681 - 894)       | 15.96%<br>(8.02% - 22.71%)     |
| Alcohol use                             | 352<br>(293 - 413)       | 356<br>(297 - 418)       | 16.72%<br>(7.24% - 25.14%)     | 250<br>(207 - 295)       | 197<br>(164 - 230)       | -16.68%<br>(-22.28% - -11.36%) | 602<br>(505 - 701)       | 553<br>(464 - 641)       | 0.60%<br>(-5.85% - 6.12%)      |
| Drug use                                | 126<br>(98 - 157)        | 194<br>(158 - 227)       | 95.71%<br>(56.86% - 122.58%)   | 54<br>(41 - 67)          | 71<br>(58 - 85)          | 47.97%<br>(34.42% - 63.98%)    | 180<br>(140 - 223)       | 265<br>(219 - 312)       | 74.64%<br>(49.98% - 95.50%)    |
| Dietary risks                           | 1,636<br>(1,454 - 1,803) | 904<br>(773 - 1,033)     | -41.03%<br>(-44.83% - -37.05%) | 994<br>(832 - 1,137)     | 566<br>(459 - 695)       | -39.63%<br>(-45.44% - -30.35%) | 2,630<br>(2,307 - 2,935) | 1,470<br>(1,248 - 1,688) | -41.04%<br>(-44.34% - -36.35%) |
| Diet low in fruits                      | 427<br>(250 - 606)       | 231<br>(130 - 339)       | -42.34%<br>(-51.64% - -33.38%) | 242<br>(132 - 356)       | 139<br>(70 - 218)        | -40.13%<br>(-54.15% - -24.24%) | 669<br>(385 - 951)       | 370<br>(209 - 547)       | -42.34%<br>(-50.38% - -34.44%) |
| Diet low in vegetables                  | 288<br>(226 - 357)       | 147<br>(114 - 183)       | -45.35%<br>(-50.64% - -39.52%) | 194<br>(147 - 244)       | 104<br>(79 - 138)        | -44.62%<br>(-52.55% - -31.84%) | 482<br>(380 - 594)       | 251<br>(198 - 309)       | -45.63%<br>(-50.10% - -40.34%) |
| Diet low in whole grains                | 247<br>(177 - 322)       | 132<br>(92 - 174)        | -41.71%<br>(-46.18% - -36.55%) | 160<br>(110 - 208)       | 93<br>(63 - 128)         | -36.91%<br>(-44.35% - -25.81%) | 407<br>(291 - 529)       | 225<br>(157 - 300)       | -40.65%<br>(-45.03% - -35.44%) |
| Diet low in nuts and seeds              | 333<br>(242 - 430)       | 146<br>(104 - 192)       | -52.43%<br>(-56.48% - -46.62%) | 172<br>(123 - 227)       | 82<br>(56 - 116)         | -49.55%<br>(-56.87% - -33.80%) | 505<br>(368 - 649)       | 228<br>(162 - 301)       | -52.27%<br>(-56.22% - -46.07%) |
| Diet low in milk                        | 17<br>(5 - 30)           | 16<br>(4 - 29)           | -1.58%<br>(-14.58% - 11.36%)   | 14<br>(4 - 25)           | 11<br>(3 - 19)           | -22.18%<br>(-32.80% - -11.21%) | 32<br>(9 - 54)           | 27<br>(7 - 47)           | -10.65%<br>(-19.63% - -1.20%)  |
| Diet high in red meat                   | 19<br>(10 - 27)          | 25<br>(15 - 37)          | 52.92%<br>(19.15% - 94.04%)    | 20<br>(11 - 28)          | 23<br>(14 - 33)          | 27.53%<br>(-3.01% - 68.37%)    | 38<br>(22 - 55)          | 48<br>(30 - 68)          | 39.62%<br>(14.47% - 71.51%)    |
| Diet high in processed meat             | 281<br>(177 - 401)       | 182<br>(103 - 270)       | -27.64%<br>(-58.06% - 11.76%)  | 125<br>(77 - 181)        | 81<br>(38 - 133)         | -28.11%<br>(-63.05% - 16.57%)  | 406<br>(266 - 573)       | 262<br>(157 - 385)       | -29.38%<br>(-53.54% - -0.31%)  |
| Diet high in sugar-sweetened beverages  | 12<br>(5 - 21)           | 18<br>(9 - 30)           | 93.59%<br>(4.25% - 262.52%)    | 11<br>(5 - 20)           | 15<br>(7 - 25)           | 50.68%<br>(-25.49% - 191.97%)  | 23<br>(12 - 38)          | 33<br>(18 - 53)          | 66.88%<br>(11.52% - 150.70%)   |
| Diet low in fiber                       | 259<br>(169 - 346)       | 133<br>(84 - 186)        | -44.11%<br>(-63.77% - -18.57%) | 128<br>(82 - 174)        | 61<br>(34 - 93)          | -49.19%<br>(-70.68% - -23.53%) | 386<br>(273 - 502)       | 194<br>(132 - 263)       | -47.07%<br>(-62.90% - -30.06%) |
| Diet suboptimal in calcium              | 30<br>(25 - 38)          | 33<br>(24 - 44)          | 10.57%<br>(-20.69% - 32.59%)   | 12<br>(6 - 19)           | 10<br>(3 - 18)           | -11.35%<br>(-65.99% - 69.52%)  | 43<br>(35 - 50)          | 43<br>(32 - 54)          | 5.06%<br>(-22.25% - 34.53%)    |
| Diet low in seafood omega-3 fatty acids | 106<br>(62 - 158)        | 48<br>(27 - 73)          | -51.06%<br>(-61.77% - -36.27%) | 50<br>(27 - 78)          | 24<br>(13 - 39)          | -51.38%<br>(-63.62% - -28.08%) | 157<br>(93 - 229)        | 72<br>(42 - 107)         | -52.25%<br>(-60.78% - -40.47%) |
| Diet low in polyunsaturated fatty acids | 148<br>(117 - 178)       | 59<br>(45 - 75)          | -56.94%<br>(-63.14% - -49.43%) | 75<br>(55 - 95)          | 30<br>(21 - 42)          | -59.17%<br>(-68.61% - -43.45%) | 224<br>(177 - 269)       | 89<br>(70 - 111)         | -58.33%<br>(-64.27% - -51.28%) |
| Diet high in trans fatty acids          | 216<br>(142 - 292)       | 28<br>(8 - 54)           | -86.37%<br>(-94.69% - -77.24%) | 101<br>(64 - 140)        | 13<br>(4 - 26)           | -86.85%<br>(-95.01% - -77.19%) | 317<br>(215 - 422)       | 42<br>(14 - 78)          | -86.83%<br>(-94.01% - -78.85%) |
| Diet high in sodium                     | 336<br>(136 - 605)       | 165<br>(66 - 302)        | -48.12%<br>(-55.13% - -41.82%) | 154<br>(53 - 334)        | 86<br>(26 - 185)         | -45.51%<br>(-55.52% - -33.28%) | 500<br>(192 - 941)       | 251<br>(92 - 488)        | -47.64%<br>(-54.35% - -41.07%) |
| Sexual abuse and violence               | 22<br>(12 - 35)          | 16<br>(9 - 25)           | -10.74%<br>(-24.72% - 16.62%)  | 84<br>(60 - 114)         | 65<br>(44 - 92)          | -14.33%<br>(-20.57% - -7.89%)  | 106<br>(76 - 143)        | 81<br>(56 - 112)         | -10.91%<br>(-16.91% - -2.57%)  |
| Childhood sexual abuse                  | 22<br>(12 - 35)          | 16<br>(9 - 25)           | -10.74%<br>(-24.72% - 16.62%)  | 25<br>(13 - 40)          | 19<br>(10 - 32)          | -13.24%<br>(-21.87% - -2.84%)  | 47<br>(27 - 74)          | 35<br>(20 - 56)          | -12.16%<br>(-20.13% - 3.79%)   |
| Intimate Partner Violence               | --                       | --                       | --                             | 64<br>(47 - 89)          | 49<br>(34 - 71)          | -16.34%<br>(-23.14% - -9.46%)  | 64<br>(47 - 89)          | 49<br>(34 - 71)          | -11.42%<br>(-18.97% - -4.03%)  |
| Unsafe sex                              | 14<br>(11 - 17)          | 10<br>(7 - 14)           | -8.43%<br>(-29.05% - 14.67%)   | 48<br>(39 - 53)          | 31<br>(26 - 36)          | -31.90%<br>(-39.95% - -24.13%) | 62<br>(53 - 70)          | 41<br>(35 - 49)          | -25.17%<br>(-33.94% - -16.42%) |
| Low physical activity                   | 378<br>(319 - 451)       | 207<br>(174 - 244)       | -41.94%<br>(-46.48% - -36.85%) | 305<br>(263 - 349)       | 188<br>(160 - 228)       | -35.45%<br>(-41.88% - -24.77%) | 683<br>(588 - 797)       | 396<br>(340 - 461)       | -39.57%<br>(-44.24% - -33.74%) |



|                                |                          |                          |                                |                          |                          |                                |                          |                          |                                |
|--------------------------------|--------------------------|--------------------------|--------------------------------|--------------------------|--------------------------|--------------------------------|--------------------------|--------------------------|--------------------------------|
| Metabolic                      | 2,225<br>(2,094 - 2,380) | 1,392<br>(1,227 - 1,577) | -33.01%<br>(-36.15% - -29.77%) | 1,810<br>(1,609 - 1,984) | 1,228<br>(1,049 - 1,427) | -26.08%<br>(-30.64% - -19.03%) | 4,035<br>(3,727 - 4,349) | 2,621<br>(2,299 - 2,973) | -30.43%<br>(-33.42% - -27.27%) |
| High fasting plasma glucose    | 417<br>(350 - 488)       | 340<br>(272 - 417)       | -10.99%<br>(-23.13% - 2.71%)   | 409<br>(335 - 490)       | 343<br>(273 - 424)       | -8.41%<br>(-21.31% - 5.26%)    | 826<br>(693 - 968)       | 683<br>(556 - 832)       | -9.92%<br>(-20.47% - 1.26%)    |
| High total cholesterol         | 859<br>(616 - 1,110)     | 346<br>(258 - 466)       | -56.96%<br>(-60.40% - -51.86%) | 367<br>(236 - 538)       | 155<br>(100 - 243)       | -57.05%<br>(-63.42% - -43.25%) | 1,226<br>(863 - 1,644)   | 501<br>(362 - 684)       | -57.62%<br>(-61.23% - -51.39%) |
| High systolic blood pressure   | 1,429<br>(1,262 - 1,573) | 597<br>(512 - 686)       | -55.80%<br>(-58.82% - -52.75%) | 1,044<br>(890 - 1,166)   | 473<br>(398 - 570)       | -51.11%<br>(-55.60% - -43.70%) | 2,474<br>(2,188 - 2,716) | 1,070<br>(920 - 1,235)   | -54.05%<br>(-56.93% - -50.71%) |
| High body-mass index           | 778<br>(653 - 897)       | 703<br>(587 - 824)       | -0.37%<br>(-7.63% - 8.16%)     | 626<br>(521 - 725)       | 601<br>(494 - 714)       | 3.32%<br>(-5.15% - 13.21%)     | 1,404<br>(1,188 - 1,610) | 1,304<br>(1,090 - 1,525) | 0.39%<br>(-6.15% - 7.93%)      |
| Low bone mineral density       | 104<br>(81 - 132)        | 90<br>(67 - 120)         | -16.49%<br>(-28.03% - -3.57%)  | 186<br>(145 - 230)       | 123<br>(93 - 160)        | -32.34%<br>(-43.12% - -21.04%) | 290<br>(225 - 363)       | 214<br>(160 - 281)       | -27.07%<br>(-37.86% - -15.51%) |
| Low glomerular filtration rate | 291<br>(219 - 372)       | 218<br>(163 - 276)       | -18.37%<br>(-26.12% - -10.91%) | 315<br>(238 - 402)       | 249<br>(189 - 312)       | -12.06%<br>(-20.19% - -3.49%)  | 606<br>(461 - 767)       | 467<br>(354 - 584)       | -15.12%<br>(-22.80% - -7.82%)  |

**Web Table 9: GBD 2013 region-level covariates for the nine regions of England\***

|                                                                                                                                                                                                               |
|---------------------------------------------------------------------------------------------------------------------------------------------------------------------------------------------------------------|
| Education (years per capita)                                                                                                                                                                                  |
| Lag distributed income per capita (LDI)                                                                                                                                                                       |
| Cholesterol (total, mean per capita)                                                                                                                                                                          |
| Systolic blood pressure (mmHg)                                                                                                                                                                                |
| Diabetes fasting plasma glucose (mmol/L)                                                                                                                                                                      |
| Mean body mass index (BMI)                                                                                                                                                                                    |
| Prevalence of obesity                                                                                                                                                                                         |
| Prevalence of obesity (age-standardized)                                                                                                                                                                      |
| Prevalence of overweight and obesity                                                                                                                                                                          |
| Prevalence of smoking                                                                                                                                                                                         |
| Alcohol (liters per capita)                                                                                                                                                                                   |
| Diphtheria-tetanus-pertussis (DTP3) immunization coverage (proportion)                                                                                                                                        |
| Tetanus Toxoid vaccine coverage smooth (proportion)                                                                                                                                                           |
| Measles vaccine coverage (proportion)                                                                                                                                                                         |
| Antenatal care (1 visit) coverage (proportion)                                                                                                                                                                |
| Antenatal care (4 visits) coverage (proportion)                                                                                                                                                               |
| Hemoglobinopathies prevalence x excess mortality                                                                                                                                                              |
| Hemoglobinopathies prevalence x excess mortality (excluding G6PD deficiency)                                                                                                                                  |
| Log age-standardized melanoma incidence                                                                                                                                                                       |
| Age-standardized death rate for endocrine, metabolic, blood, and immune disorders                                                                                                                             |
| Age-standardized prevalence of chronic kidney disease (CKD) stage 3                                                                                                                                           |
| Age-standardized prevalence of chronic kidney disease (CKD) stage 4                                                                                                                                           |
| Seroprevalence of varicella                                                                                                                                                                                   |
| Animal fats (kcal per capita)                                                                                                                                                                                 |
| Fruits (kcal per capita)                                                                                                                                                                                      |
| Lognormal milk (kcal per capita)                                                                                                                                                                              |
| Nuts and seeds (kcal per capita)                                                                                                                                                                              |
| Percent of total calories consumed as animal fat                                                                                                                                                              |
| Percent of total calories consumed as fruits                                                                                                                                                                  |
| Percent of total calories consumed as legumes                                                                                                                                                                 |
| Percent of total calories consumed as milk                                                                                                                                                                    |
| Percent of total calories consumed as nuts and seeds                                                                                                                                                          |
| Percent of total calories consumed as pig meat                                                                                                                                                                |
| Percent of total calories consumed as PUFA3                                                                                                                                                                   |
| Percent of total calories consumed as PUFA6                                                                                                                                                                   |
| Percent of total calories consumed as red meat                                                                                                                                                                |
| Percent of total calories consumed as red meat (without pig meat)                                                                                                                                             |
| Percent of total calories consumed as saturated fat                                                                                                                                                           |
| Percent of total calories consumed as saturated and animal fats                                                                                                                                               |
| Percent of total calories consumed as sugar                                                                                                                                                                   |
| Percent of total calories consumed as vegetables                                                                                                                                                              |
| Percent of total calories consumed as non-wheat whole grains                                                                                                                                                  |
| Pig meat (kg per capita)                                                                                                                                                                                      |
| Polyunsaturated fatty acid (PUFA) omega 3 - seafood (kcal per capita)                                                                                                                                         |
| Polyunsaturated fatty acid (PUFA) omega 6 - vegetable oils (kcal per capita)                                                                                                                                  |
| Pulses and legumes (kcal per capita)                                                                                                                                                                          |
| Red meat (kcal per capita)                                                                                                                                                                                    |
| Red meat without pig meat (kcal per capita)                                                                                                                                                                   |
| Saturated fats (kcal per capita)                                                                                                                                                                              |
| Saturated fats and animal fats (kcal per capita)                                                                                                                                                              |
| Stimulants (kcal per capita)                                                                                                                                                                                  |
| Sugar (kcal per capita)                                                                                                                                                                                       |
| Total calories (kcal per capita)                                                                                                                                                                              |
| Vegetables (kcal per capita)                                                                                                                                                                                  |
| Whole grains (kcal per capita)                                                                                                                                                                                |
| *The nine regions of England include: Greater London, West Midlands, East Midlands, South West England, South East England, North West England, North East England, East of England, Yorkshire and the Humber |
